# Supplementary material for: The combination of asymmetric hydrogenation of olefins and direct reductive amination
Source: PubMed Central journal article supplement (PMC6992772; doi:10.1038/s41467-020-14475-x), 2020-01-30
Supplement: 41467_2020_14475_MOESM2_ESM.pdf [file 41467_2020_14475_MOESM2_ESM.pdf]

Supplementary Information

**The Combination of Asymmetric Hydrogenation of Olefin  
and Direct Reductive Amination**

Yuan et al.

## Supplementary methods

**General remarks.** All reactions were performed in the nitrogen-filled glovebox or under nitrogen using standard Schlenk techniques unless otherwise noted. Column chromatography was performed using silica gel 60 (200–300 mesh).  $^1\text{H}$  NMR,  $^{13}\text{C}$  NMR spectral data were obtained from Bruker 500 MHz or Bruker AVANCE III HD (400 MHz) spectrometers. Chemical shifts are reported in ppm. Enantiomeric excess values were determined by chiral HPLC on an Agilent 1220 Series instrument. All new products were further characterized by HRMS. A positive ion mass spectrum of sample was acquired on a Thermo Scientific LTQ Orbitrap XL mass spectrometer.

### General procedure A for the synthesis of substrate:

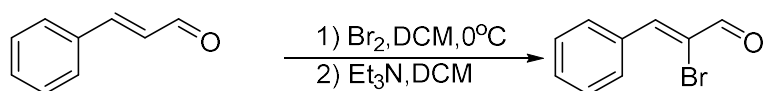

**Supplementary Figure 1.** Bromination of the  $\alpha,\beta$ -unsaturated aldehyde.

**Step 1:** To a solution of cinnamaldehyde (10.0g, 75.5 mmol) in DCM (100 mL) was added  $\text{Br}_2$  (4.7 mL, 91.5 mmol, 1.2 equiv.) at  $0^\circ\text{C}$ . The reaction mixture was stirred for 15 min, followed by the addition of  $\text{Et}_3\text{N}$  (18.0 mL, 129 mmol, 1.7 equiv.). After stirring for an additional 15 min, the reaction mixture was diluted with DCM and washed sequentially with a 10%  $\text{NaHSO}_3$  solution,  $\text{H}_2\text{O}$ , and brine. The organic layer was separated and dried over anhydrous  $\text{Na}_2\text{SO}_4$ , filtered, and concentrated to yield orange oil. After keeping for 3 days at room temperature, the mixture crystallized completely as a bright yellow solid which was confirmed to be the desired (Z)-2-bromo-3-phenylacrylaldehyde (15.6 g, 98% yield).<sup>[1]</sup>

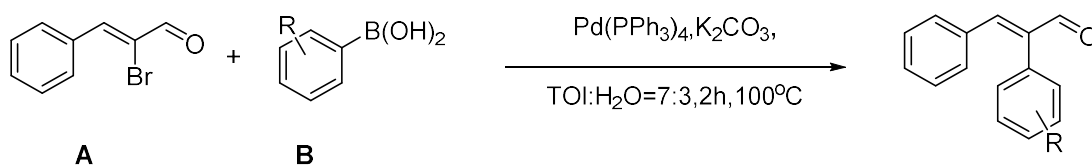

**Supplementary Figure 2.** Synthesis of 2,3-diphenyl acrolein and its derivatives.

**Step 2:** A mixture of A (10 mmol), B (1.1 equiv, 11 mmol),  $\text{Pd}(\text{PPh}_3)_4$  (2%, 0.2 mmol), and  $\text{K}_2\text{CO}_3$  (4 equiv, 40 mmol) in toluene: $\text{H}_2\text{O}$  (7:3, 25 mL) was heated at  $100^\circ\text{C}$  for 2 h. The reaction mixture was passed through a plug of Florisil® eluting with hexane:AcOEt = 5:1, and then concentrated under reduced pressure. The residue was purified by column chromatography on silica gel (hexane:AcOEt = 15:1) to afford **1a–1q**.<sup>[2]</sup>

**General procedure B for the synthesis of substrate:**

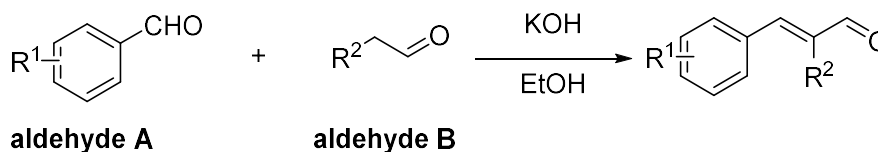

**Supplementary Figure 3.** Synthesis of 2,3-diphenyl acrolein and its derivatives.

To a stirred solution of KOH (0.56g, 0.01 mol) in EtOH (25 mL, 95%) was added aldehyde A (0.01 mol), the mixture was cooled to 0 °C and aldehyde B (0.02 mol) was added slowly so that the reaction temperature did not exceed 10 °C. After being stirred for 6 h, the reaction was quenched by addition of HCl (25 mL, 3 M, aq.) and extraction with Et<sub>2</sub>O (3×20 mL). The organic layer was dried over MgSO<sub>4</sub> and concentrated to give the crude product as a color residue. The crude product was purified by column chromatography on silica gel (petroleum ether/EtOAc = 9/1) to afford substituted cinnamyl aldehydes **1r–1za**.<sup>[3]</sup>

Known Compounds: **1a**<sup>[4]</sup>, **1b**<sup>[5]</sup>, **1c**<sup>[6]</sup>, **1e**<sup>[7]</sup>, **1g**<sup>[8]</sup>, **1k**<sup>[8]</sup>, **1l**<sup>[8]</sup>, **1r**<sup>[9]</sup>, **1s**<sup>[4]</sup>, **1u**<sup>[4]</sup>, **1v**<sup>[4]</sup>, **1za**<sup>[10]</sup>.

**(E)-2-([1,1'-biphenyl]-4-yl)-3-phenylacrylaldehyde (1d):** White solid; <sup>1</sup>H NMR (400 MHz, CDCl<sub>3</sub>): δ 9.72 (s, 1H), 7.69–7.49 (m, 4H), 7.44–7.35 (m, 2H), 7.34 (s, 1H), 7.32–7.11 (m, 8H); <sup>13</sup>C NMR (100 MHz, CDCl<sub>3</sub>): δ 192.94, 149.35, 140.33, 140.00, 139.53, 132.98, 131.14, 129.72, 129.26, 128.82, 128.79, 127.78, 127.53, 126.49, 126.45, 126.05. HRMS (ESI) m/z calcd for C<sub>21</sub>H<sub>17</sub>O<sup>+</sup> (M+H)<sup>+</sup> 285.12739, found 285.12762.

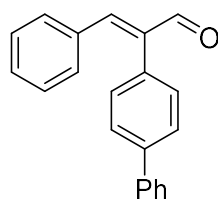

**(E)-2-(4-chlorophenyl)-3-phenylacrylaldehyde (1f):** White solid; <sup>1</sup>H NMR (400 MHz, CDCl<sub>3</sub>): δ 9.75 (s, 1H), 7.72–6.90 (m, 10H); <sup>13</sup>C NMR (100 MHz, CDCl<sub>3</sub>): δ 192.46, 149.72, 139.51, 133.34, 132.66, 130.58, 129.85, 129.64, 129.44, 128.12, 127.62. HRMS (ESI) m/z calcd for C<sub>15</sub>H<sub>12</sub>ClO<sup>+</sup> (M+H)<sup>+</sup> 243.05712, found 243.05711.

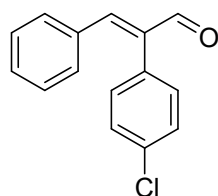

**(E)-2-(3-methoxyphenyl)-3-phenylacrylaldehyde (1h):** White solid; <sup>1</sup>H NMR (400 MHz, CDCl<sub>3</sub>): δ 9.68 (s, 1H), 7.30 (s, 1H), 7.29–7.11 (m, 6H), 6.92–6.79 (m, 1H), 6.72–6.67 (m, 1H), 6.66 (dd, *J* = 2.6, 1.4 Hz, 1H), 3.69 (s, 3H); <sup>13</sup>C NMR (100 MHz, CDCl<sub>3</sub>): δ 192.74, 158.91, 149.05, 140.60, 133.69, 132.88, 129.77, 129.27, 128.98, 127.49, 120.50, 113.53, 113.07, 54.19. HRMS (ESI) m/z calcd for C<sub>16</sub>H<sub>15</sub>O<sub>2</sub><sup>+</sup> (M+H)<sup>+</sup> 239.10666, found 239.10670.

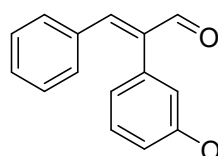

**(E)-N-(3-(3-oxo-1-phenylprop-1-en-2-yl)phenyl)acetamide (1i):** White solid; <sup>1</sup>H NMR (400 MHz, CDCl<sub>3</sub>): δ 9.74 (s, 1H), 7.92 (s, 1H), 7.64 (d, *J* = 2.2 Hz, 1H), 7.40 (s, 1H), 7.36–7.17 (m, 7H), 6.85 (d, *J* = 7.5 Hz, 1H), 2.00 (s, 3H); <sup>13</sup>C NMR (100 MHz, CDCl<sub>3</sub>): δ 194.52, 168.60, 151.20, 141.29, 139.03, 133.88, 133.67, 130.94, 130.58, 129.63, 128.60, 124.50, 120.10, 119.80, 24.44. HRMS (ESI) m/z calcd for C<sub>17</sub>H<sub>16</sub>NO<sub>2</sub><sup>+</sup> (M+H)<sup>+</sup> 266.11756, found 266.11777.

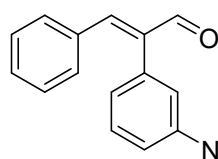

**(E)-2-(3,5-dimethylphenyl)-3-phenylacrylaldehyde (1j):** White solid;  $^1\text{H}$  NMR (400 MHz,  $\text{CDCl}_3$ ):  $\delta$  9.75 (s, 1H), 7.34 (s, 1H), 7.32–7.19 (m, 5H), 7.01 (s, 1H), 6.79 (s, 2H), 2.30 (s, 6H);  $^{13}\text{C}$  NMR (100 MHz,  $\text{CDCl}_3$ ):  $\delta$  194.22, 149.77, 142.13, 138.41, 134.12, 133.24, 130.84, 130.18, 130.04, 128.46, 126.69, 21.34. HRMS (ESI)  $m/z$  calcd for  $\text{C}_{17}\text{H}_{17}\text{O}^+$  ( $\text{M}+\text{H}$ ) $^+$  237.12739, found 237.12732.

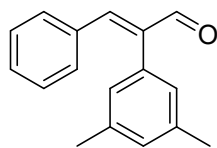

**(E)-2-(2-fluorophenyl)-3-phenylacrylaldehyde (1m):** Pale yellow solid;  $^1\text{H}$  NMR (500 MHz,  $\text{CDCl}_3$ ):  $\delta$  9.77 (s, 1H), 7.54 (s, 1H), 7.45–7.36 (m, 1H), 7.35–7.29 (m, 1H), 7.27–7.10 (m, 7H);  $^{13}\text{C}$  NMR (125 MHz,  $\text{CDCl}_3$ ):  $\delta$  192.85, 160.85, 158.88, 151.59, 136.11, 133.91, 131.36, 130.66, 130.41, 128.71, 124.60, 124.58, 121.37, 116.23. HRMS (ESI)  $m/z$  calcd for  $\text{C}_{15}\text{H}_{12}\text{FO}^+$  ( $\text{M}+\text{H}$ ) $^+$  227.08667, found 227.08652.

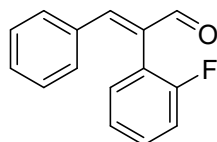

**(E)-2-(2-chlorophenyl)-3-phenylacrylaldehyde (1n):** Pale yellow solid;  $^1\text{H}$  NMR (400 MHz,  $\text{CDCl}_3$ ):  $\delta$  9.76 (s, 1H), 7.53 (s, 1H), 7.51 (dd,  $J = 7.9, 1.4$  Hz, 1H), 7.40–7.28 (m, 3H), 7.28–7.21 (m, 2H), 7.19–7.09 (m, 3H);  $^{13}\text{C}$  NMR (100 MHz,  $\text{CDCl}_3$ ):  $\delta$  191.71, 149.72, 138.47, 132.74, 132.52, 132.10, 129.89, 129.63, 129.48, 128.94, 128.85, 127.69, 126.33. HRMS (ESI)  $m/z$  calcd for  $\text{C}_{15}\text{H}_{12}\text{ClO}^+$  ( $\text{M}+\text{H}$ ) $^+$  243.05712, found 243.05714.

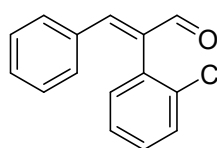

**(E)-2-(naphthalen-2-yl)-3-phenylacrylaldehyde (1o):** White solid;  $^1\text{H}$  NMR (400 MHz,  $\text{CDCl}_3$ ):  $\delta$  9.84 (s, 1H), 7.95–7.78 (m, 3H), 7.75 (s, 1H), 7.57–7.47 (m, 2H), 7.46 (s, 1H), 7.33–7.13 (m, 6H);  $^{13}\text{C}$  NMR (100 MHz,  $\text{CDCl}_3$ ):  $\delta$  193.95, 150.38, 141.51, 133.97, 133.50, 133.07, 130.79, 130.70, 130.30, 128.75, 128.54, 128.51, 128.26, 127.75, 127.02, 126.41, 126.13. HRMS (ESI)  $m/z$  calcd for  $\text{C}_{19}\text{H}_{15}\text{O}^+$  ( $\text{M}+\text{H}$ ) $^+$  259.11174, found 259.11185.

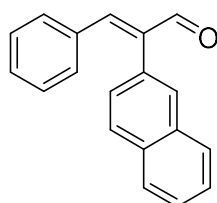

**(E)-2-(naphthalen-1-yl)-3-phenylacrylaldehyde (1p):** White solid;  $^1\text{H}$  NMR (400 MHz,  $\text{CDCl}_3$ ):  $\delta$  9.92 (s, 1H), 7.96–7.87 (m, 2H), 7.70 (s, 1H), 7.61 (d,  $J = 1.1$  Hz, 1H), 7.56–7.40 (m, 2H), 7.42–7.32 (m, 1H), 7.28 (dd,  $J = 7.1, 1.2$  Hz, 1H), 7.25–7.17 (m, 1H), 7.15–6.98 (m, 4H);  $^{13}\text{C}$  NMR (100 MHz,  $\text{CDCl}_3$ ):  $\delta$  192.94, 150.14, 139.42, 132.80, 132.76, 130.69, 130.07, 129.81, 129.43, 127.82, 127.57, 127.54, 125.97, 125.50, 125.16, 124.79, 123.81. HRMS (ESI)  $m/z$  calcd for  $\text{C}_{19}\text{H}_{15}\text{O}^+$  ( $\text{M}+\text{H}$ ) $^+$  259.11174, found 259.11194.

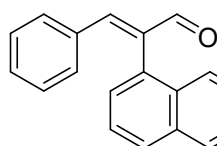

**(Z)-3-phenyl-2-(thiophen-2-yl)acrylaldehyde (1q):** Brown solid;  $^1\text{H}$  NMR (400 MHz,  $\text{CDCl}_3$ ):  $\delta$  9.73 (s, 1H), 7.44 (s, 1H), 7.43 (dd,  $J = 4.9, 1.4$  Hz, 1H), 7.40–7.26 (m, 5H), 7.12–7.02 (m, 2H);  $^{13}\text{C}$  NMR (125 MHz,  $\text{CDCl}_3$ ):  $\delta$  191.77, 149.96, 133.64, 132.93, 131.66, 129.41, 129.38, 127.58, 127.39, 126.48, 126.22. HRMS (ESI)  $m/z$  calcd for  $\text{C}_{13}\text{H}_{11}\text{OS}^+$  ( $\text{M}+\text{H}$ ) $^+$  215.05251, found 215.05241.

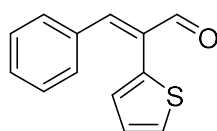

**(E)-3-(4-(tert-butyl)phenyl)-2-phenylacrylaldehyde (1t):** White solid;  $^1\text{H}$  NMR (400 MHz,  $\text{CDCl}_3$ ):  $\delta$  9.67 (s, 1H), 7.39–7.31 (m, 3H), 7.28 (s, 1H), 7.21–7.11 (m, 4H), 7.10–7.04 (m, 2H), 1.19 (s, 9H);  $^{13}\text{C}$  NMR (100 MHz,  $\text{CDCl}_3$ ):  $\delta$  194.03, 154.02, 150.25, 141.08, 133.71, 131.18, 130.77, 129.28, 128.88, 128.20, 125.55, 34.88, 31.02. HRMS (ESI)  $m/z$  calcd for  $\text{C}_{19}\text{H}_{21}\text{O}^+$  ( $\text{M}+\text{H}$ ) $^+$  265.15869, found 265.15881.

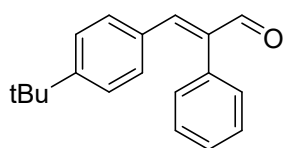

**(E)-2-phenyl-3-(3-(trifluoromethyl)phenyl)acrylaldehyde (1w):** White solid;  $^1\text{H}$  NMR (400 MHz,  $\text{CDCl}_3$ ):  $\delta$  9.81 (s, 1H), 7.59–7.50 (m, 1H), 7.48–7.38 (m, 5H), 7.37–7.30 (m, 2H), 7.24–7.12 (m, 2H);  $^{13}\text{C}$  NMR (125 MHz,  $\text{CDCl}_3$ ):  $\delta$  192.40, 146.55, 142.17, 133.73, 132.37, 131.50, 128.10, 128.03, 127.96, 127.71, 126.31 (q,  $J = 4.0$  Hz), 125.44 (q,  $J = 3.7$  Hz), 123.87, 121.16. HRMS (ESI)  $m/z$  calcd for  $\text{C}_{16}\text{H}_{12}\text{F}_3\text{O}^+$  ( $\text{M}+\text{H}$ ) $^+$  277.08348, found 277.08362.

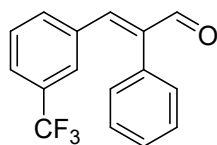

**(E)-3-(3,5-dichlorophenyl)-2-phenylacrylaldehyde (1x):** Pale yellow solid;  $^1\text{H}$  NMR (400 MHz,  $\text{CDCl}_3$ ):  $\delta$  9.77 (s, 1H), 7.48–7.40 (m, 3H), 7.27 (t,  $J = 1.9$  Hz, 1H), 7.25 (s, 1H), 7.19–7.12 (m, 2H), 7.04 (d,  $J = 1.8$  Hz, 2H);  $^{13}\text{C}$  NMR (100 MHz,  $\text{CDCl}_3$ ):  $\delta$  193.18, 145.99, 143.73, 136.84, 135.05, 132.08, 129.66, 129.08, 129.04, 128.95, 128.56. HRMS (ESI)  $m/z$  calcd for  $\text{C}_{15}\text{H}_{11}\text{Cl}_2\text{O}^+$  ( $\text{M}+\text{H}$ ) $^+$  277.01815, found 277.01849.

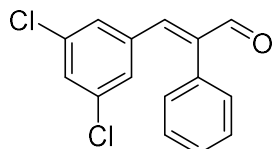

**(E)-3-(2-chlorophenyl)-2-phenylacrylaldehyde (1y):** White solid;  $^1\text{H}$  NMR (400 MHz,  $\text{CDCl}_3$ ):  $\delta$  9.86 (s, 1H), 7.72 (s, 1H), 7.44 (dd,  $J = 8.1, 1.2$  Hz, 1H), 7.39–7.28 (m, 3H), 7.25–7.09 (m, 3H), 7.00–6.85 (m, 2H);  $^{13}\text{C}$  NMR (100 MHz,  $\text{CDCl}_3$ ):  $\delta$  193.56, 145.99, 143.06, 135.12, 132.60, 132.27, 131.04, 130.71, 129.81, 129.59, 128.63, 128.42, 126.32. HRMS (ESI)  $m/z$  calcd for  $\text{C}_{15}\text{H}_{12}\text{ClO}^+$  ( $\text{M}+\text{H}$ ) $^+$  243.05712, found 243.05719.

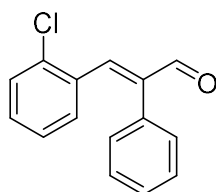

**(E)-3-(2-fluorophenyl)-2-phenylacrylaldehyde (1z):** White solid;  $^1\text{H}$  NMR (400 MHz,  $\text{CDCl}_3$ ):  $\delta$  9.81 (s, 1H), 7.64 (s, 1H), 7.47–7.33 (m, 3H), 7.32–7.24 (m, 1H), 7.23–7.16 (m, 2H), 7.14–7.03 (m, 1H), 6.98–6.88 (m, 1H), 6.87–6.80 (m, 1H);  $^{13}\text{C}$  NMR (100 MHz,  $\text{CDCl}_3$ ):  $\delta$  192.57, 161.40, 158.88, 141.87, 131.79, 130.94, 129.41, 129.39, 128.27, 127.78, 122.79, 122.76, 114.86. HRMS (ESI)  $m/z$  calcd for  $\text{C}_{15}\text{H}_{12}\text{FO}^+$  ( $\text{M}+\text{H}$ ) $^+$  227.08667, found 227.08650.

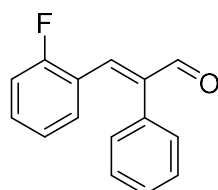

### General Procedure for Asymmetric Reductive Amination

In a nitrogen-filled glovebox,  $[\text{Rh}(\text{COD})\text{Cl}]_2$  (5  $\mu\text{mol}$ ) and L (11  $\mu\text{mol}$ ) was dissolved in anhydrous  $\text{CH}_3\text{COOCH}_3$  (1.0 mL), stirred for 20 min, and equally divided into 10 vials charged with aldehyde (0.1 mmol) and aniline (0.1 mmol) in anhydrous  $\text{CH}_3\text{COOCH}_3$  solution (0.5 mL). Then 4Cl- $\text{PhSO}_3\text{H}$  (0.3 equiv.),  $\text{NaSbF}_6$  (0.05 equiv.), were added and the total solution was made to 2.0 mL ( $\text{MeOAc}:\text{DMF} = 4:1$ ) for each vial. The resulting vials were transferred to an autoclave, which was charged with 50 atm of  $\text{H}_2$ , and stirred at 60  $^\circ\text{C}$  for 24 h. The hydrogen gas was released slowly and the solution was quenched with aqueous sodium bicarbonate solution. The organic phase was concentrated and passed through a short column of silica gel to remove the metal complex to give the crude products, which were purified by column chromatography and then analyzed by chiral HPLC determine the enantiomeric excesses.

***N*-(2,3-diphenylpropyl)aniline (3a)**: 98% yield, 98% ee, colorless oil. <sup>1</sup>H NMR (500 MHz, CDCl<sub>3</sub>): δ 7.38 (t, *J* = 7.5 Hz, 2H), 7.34–7.28 (m, 3H), 7.26 (d, *J* = 7.4 Hz, 3H), 7.22 – 7.12 (m, 4H), 6.76 (t, *J* = 7.3 Hz, 1H), 6.54 (d, *J* = 7.9 Hz, 2H), 3.54 (dd, *J* = 12.2, 5.0 Hz, 1H), 3.39–3.31 (m, 1H), 3.31–3.23 (m, 1H), 3.07 (dd, *J* = 7.3, 3.5 Hz, 2H); <sup>13</sup>C NMR (125 MHz, CDCl<sub>3</sub>): δ 148.04, 142.72, 139.94, 129.27, 129.17, 128.77, 128.40, 127.97, 126.93, 126.25, 117.48, 113.09, 48.58, 47.07, 41.14. HRMS (ESI) *m/z* calcd for C<sub>21</sub>H<sub>22</sub>N<sup>+</sup> (M+H)<sup>+</sup> 288.17468, found 288.17487. Enantiomeric excess was determined by chiral HPLC: Chiralpak IA–3 column, Hex/IPA=95:5, 1 mL/min, 220 nm, 6.76 min (minor), 8.53 min (major).

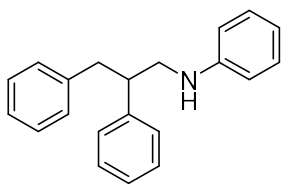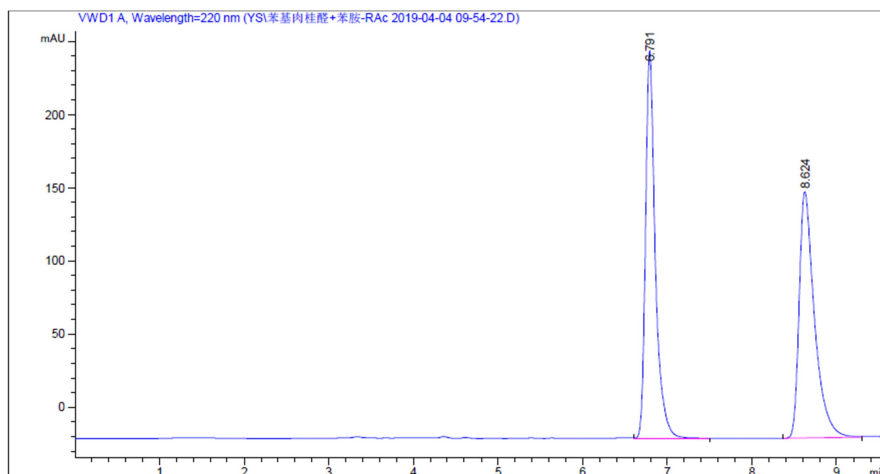

| 峰 # | 保留时间 [min] | 类型 | 峰宽 [min] | 峰面积 [mAU*s] | 峰高 [mAU]  | 峰面积 %   |
|-----|------------|----|----------|-------------|-----------|---------|
| 1   | 6.791      | VB | 0.1198   | 2128.31982  | 264.57648 | 50.1104 |
| 2   | 8.624      | BV | 0.1868   | 2118.93872  | 168.37059 | 49.8896 |

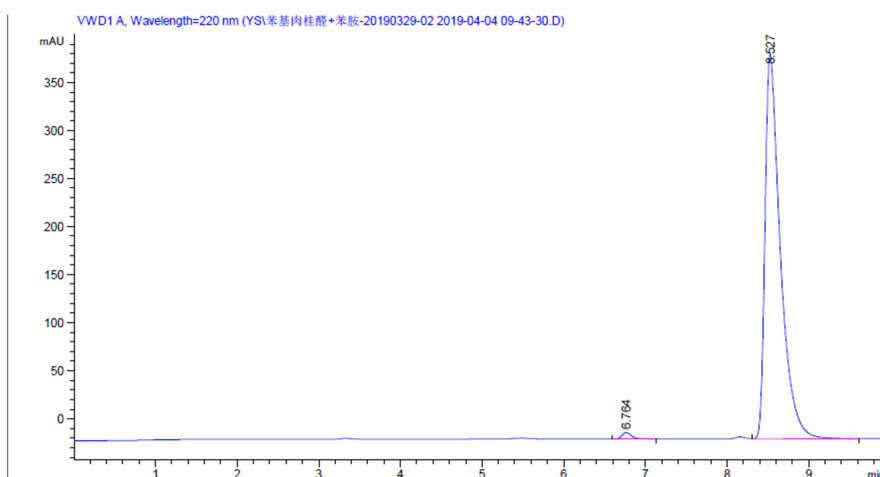

| 峰 # | 保留时间 [min] | 类型 | 峰宽 [min] | 峰面积 [mAU*s] | 峰高 [mAU]  | 峰面积 %   |
|-----|------------|----|----------|-------------|-----------|---------|
| 1   | 6.764      | BB | 0.1235   | 57.07546    | 6.90130   | 1.0796  |
| 2   | 8.527      | VV | 0.1922   | 5229.55566  | 400.91171 | 98.9204 |

**Supplementary Figure 4.** HPLC spectra for racemic and chiral **3a**.

***N*-(3-phenyl-2-(*p*-tolyl)propyl)aniline (**3b**):** 95% yield, 99% ee, colorless oil.  $^1\text{H}$  NMR (500 MHz,  $\text{CDCl}_3$ ):  $\delta$  7.25–7.20 (m, 2H), 7.19–7.13 (m, 1H), 7.13–7.03 (m, 8H), 6.65 (t,  $J = 7.3$  Hz, 1H), 6.42 (d,  $J = 7.8$  Hz, 2H), 3.41 (dd,  $J = 12.1, 4.8$  Hz, 1H), 3.55–3.30 (m, 2H), 3.18–3.10 (m, 1H), 2.96 (d,  $J = 7.3$  Hz, 2H), 2.31 (s, 3H);  $^{13}\text{C}$  NMR (125 MHz,  $\text{CDCl}_3$ ):  $\delta$  148.14, 140.10, 139.66, 136.43, 129.48, 129.26, 129.19, 128.40, 127.82, 126.22, 117.45, 113.13, 48.67, 46.63, 41.24, 21.18. HRMS (ESI)  $m/z$  calcd for  $\text{C}_{22}\text{H}_{24}\text{N}^+$  ( $\text{M}+\text{H}$ ) $^+$  302.19033, found 302.19040. Enantiomeric excess was determined by chiral HPLC: Chiralpak IA–3 column, Hex/IPA=90:10, 1 mL/min, 220 nm, 5.44 min (minor), 6.03 min (major).

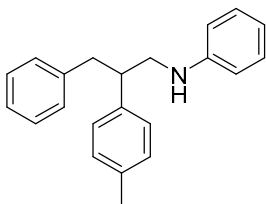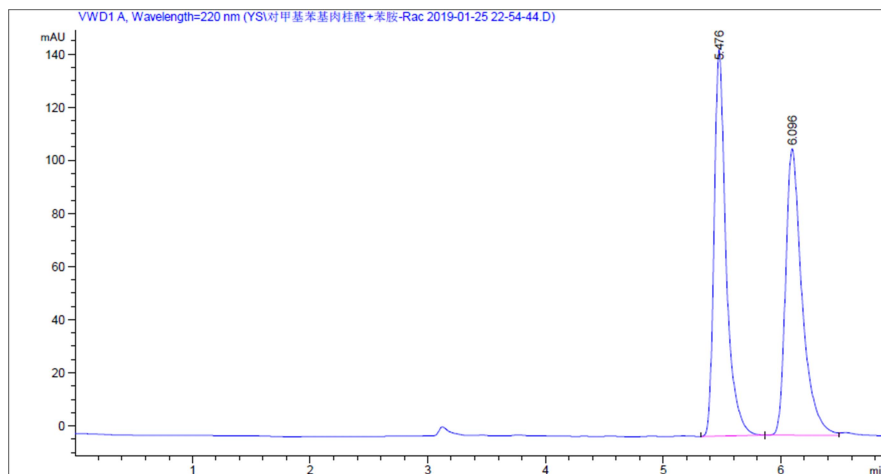

| 峰 # | 保留时间 [min] | 类型 | 峰宽 [min] | 峰面积 [mAU*s] | 峰高 [mAU]  | 峰面积 %   |
|-----|------------|----|----------|-------------|-----------|---------|
| 1   | 5.476      | BB | 0.1055   | 1029.08850  | 145.46310 | 49.5194 |
| 2   | 6.096      | BV | 0.1445   | 1049.06323  | 107.85089 | 50.4806 |

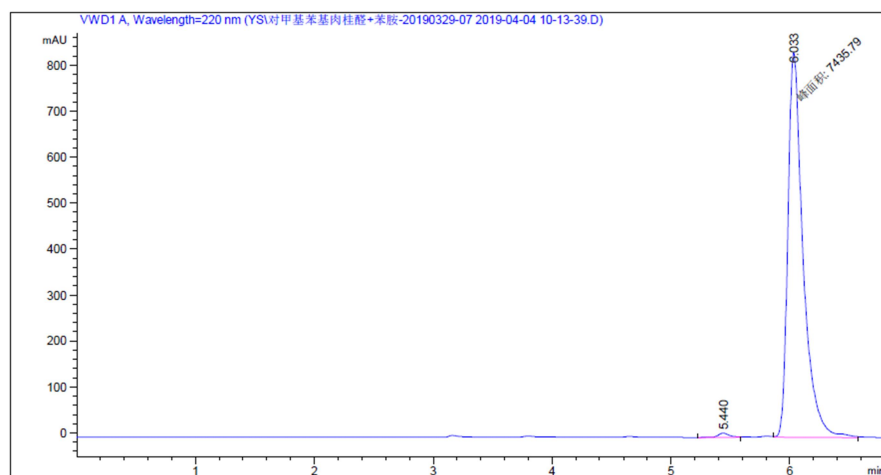

| 峰 # | 保留时间 [min] | 类型 | 峰宽 [min] | 峰面积 [mAU*s] | 峰高 [mAU]  | 峰面积 %   |
|-----|------------|----|----------|-------------|-----------|---------|
| 1   | 5.440      | BV | 0.0951   | 57.06266    | 9.10463   | 0.7606  |
| 2   | 6.033      | VB | 0.1318   | 7445.01904  | 836.95844 | 99.2394 |

**Supplementary Figure 5.** HPLC spectra for racemic and chiral **3b**.

***N*-(2-(4-(*tert*-butyl)phenyl)-3-phenylpropyl)aniline (3c)**: 97% yield, 97% ee, colorless oil. <sup>1</sup>H

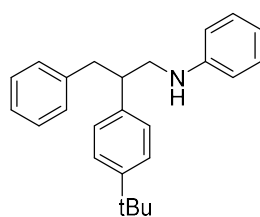

NMR (500 MHz, CDCl<sub>3</sub>): δ 7.32 (d, *J* = 8.0 Hz, 2H), 7.27–7.05 (m, 9H), 6.64 (t, *J* = 7.3 Hz, 1H), 6.41 (d, *J* = 7.9 Hz, 2H), 3.47 (s, 1H), 3.40 (dd, *J* = 12.0, 4.5 Hz, 1H), 3.26–3.10 (m, 2H), 3.05–2.90 (m, 2H), 1.31 (s, 9H); <sup>13</sup>C NMR (125 MHz, CDCl<sub>3</sub>): δ 149.72, 148.15, 140.24, 139.80, 129.25, 129.22, 128.43, 127.52, 126.25, 125.67, 117.41, 113.13, 48.47, 46.44, 41.16, 34.57, 31.52. HRMS (ESI) *m/z* calcd for C<sub>25</sub>H<sub>30</sub>N<sup>+</sup> (M+H)<sup>+</sup>

344.23728, found 344.23734. Enantiomeric excess was determined by chiral HPLC: Chiralpak IA-3 column, Hex/IPA=99:1, 1 mL/min, 220 nm, 5.80 min (major), 6.41 min (minor).

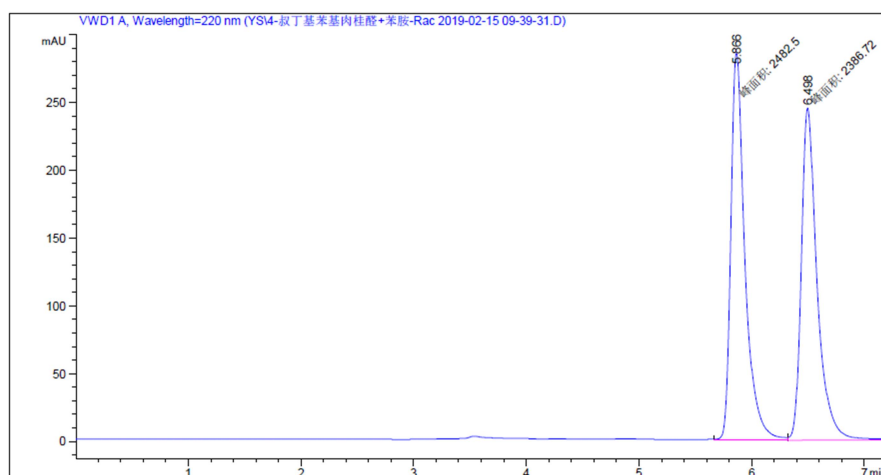

| 峰 # | 保留时间 [min] | 类型 | 峰宽 [min] | 峰面积 [mAU*s] | 峰高 [mAU]  | 峰面积 %   |
|-----|------------|----|----------|-------------|-----------|---------|
| 1   | 5.866      | MF | 0.1450   | 2482.49634  | 285.29184 | 50.9835 |
| 2   | 6.498      | FM | 0.1625   | 2386.72168  | 244.79846 | 49.0165 |

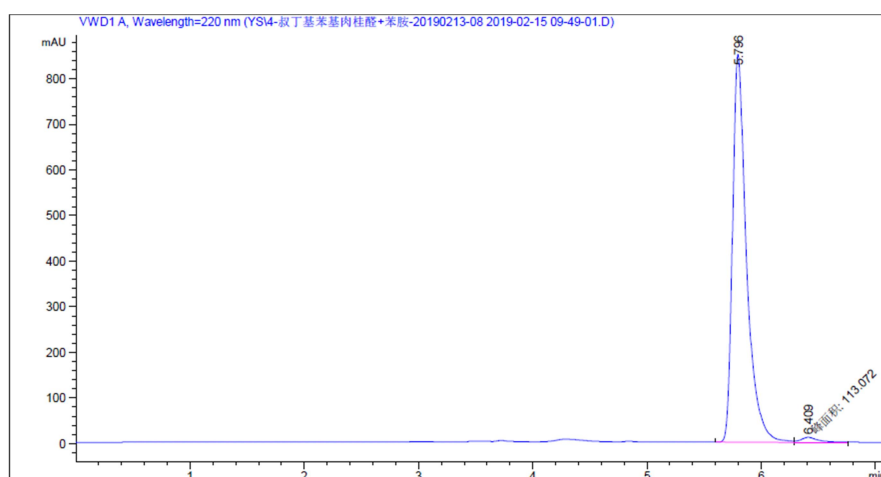

| 峰 # | 保留时间 [min] | 类型 | 峰宽 [min] | 峰面积 [mAU*s] | 峰高 [mAU]  | 峰面积 %   |
|-----|------------|----|----------|-------------|-----------|---------|
| 1   | 5.796      | BV | 0.1274   | 7246.18359  | 850.37054 | 98.4635 |
| 2   | 6.409      | MF | 0.1739   | 113.07193   | 10.83664  | 1.5365  |

**Supplementary Figure 6.** HPLC spectra for racemic and chiral **3c**.



***N*-(2-((1, 1'-biphenyl)-4-yl)-3-phenylpropyl)aniline (3d)**: 94% yield, 97% ee, colorless oil.

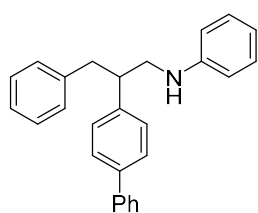

$^1\text{H}$  NMR (500 MHz,  $\text{CDCl}_3$ ):  $\delta$  7.58 (d,  $J = 7.7$  Hz, 2H), 7.53 (d,  $J = 7.9$  Hz, 2H), 7.42 (t,  $J = 7.6$  Hz, 2H), 7.35–7.03 (m, 10H), 6.66 (t,  $J = 7.3$  Hz, 1H), 6.45 (d,  $J = 8.0$  Hz, 2H), 3.47 (dd,  $J = 11.8, 4.5$  Hz, 2H), 3.36–3.16 (m, 2H), 3.01 (d,  $J = 7.0$  Hz, 2H);  $^{13}\text{C}$  NMR (125 MHz,  $\text{CDCl}_3$ ):  $\delta$  148.06, 141.88, 140.89, 139.93, 139.78, 129.32, 129.22, 128.90, 128.47, 128.40, 127.46, 127.34, 127.11, 126.32, 117.55, 113.15, 48.64, 46.76,

41.15. HRMS (ESI)  $m/z$  calcd for  $\text{C}_{27}\text{H}_{26}\text{N}^+$  ( $\text{M}+\text{H}$ ) $^+$  364.20598, found 364.20612. Enantiomeric excess was determined by chiral HPLC: Chiralpak IA-3 column, Hex/IPA=90:10, 1 mL/min, 220 nm, 7.21 min (major), 7.76 min (minor).

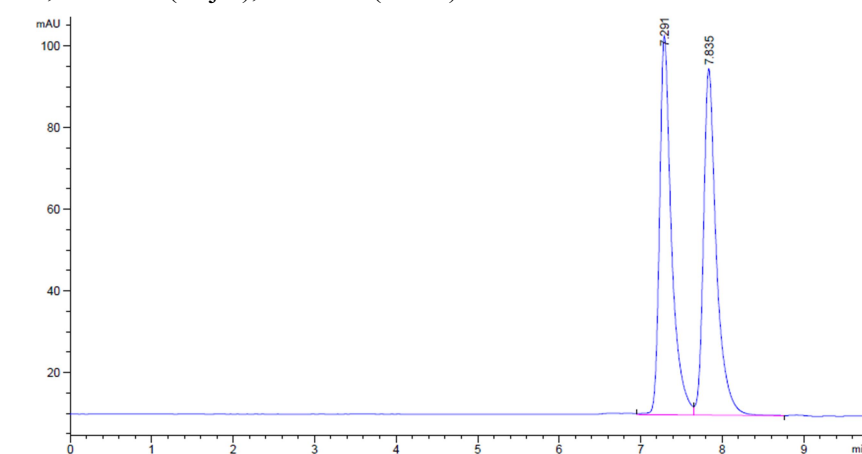

| 峰 # | 保留时间 [min] | 类型 | 峰宽 [min] | 峰面积 [mAU*s] | 峰高 [mAU] | 峰面积 %   |
|-----|------------|----|----------|-------------|----------|---------|
| 1   | 7.291      | VV | 0.1507   | 944.66406   | 92.81993 | 50.3038 |
| 2   | 7.835      | VB | 0.1633   | 933.25568   | 84.87425 | 49.6962 |

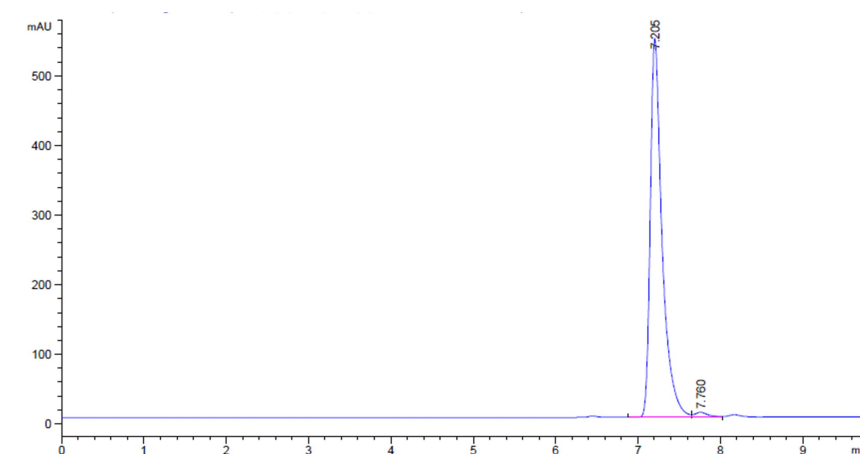

| 峰 # | 保留时间 [min] | 类型 | 峰宽 [min] | 峰面积 [mAU*s] | 峰高 [mAU]  | 峰面积 %   |
|-----|------------|----|----------|-------------|-----------|---------|
| 1   | 7.205      | BV | 0.1484   | 5425.64746  | 543.58844 | 98.5133 |
| 2   | 7.760      | VV | 0.1673   | 81.87818    | 7.05830   | 1.4867  |

**Supplementary Figure 7.** HPLC spectra for racemic and chiral **3d**.

**4-(1-phenyl-3-(phenylamino)propan-2-yl)phenol (3e):** 92% yield, 97% ee, colorless oil.  $^1\text{H}$  NMR  $\delta$  7.25–7.18 (m, 2H), 7.16 (d,  $J = 7.4$  Hz, 1H), 7.14–7.08 (m, 2H), 7.08–7.02 (m, 3H), 7.00 (d,  $J = 8.5$  Hz, 2H), 6.74–6.68 (m, 3H), 6.46 (s, 2H), 4.07 (d,  $J = 1.5$  Hz, 1H), 3.42 (dd,  $J = 12.1, 4.8$  Hz, 1H), 3.19 (dd,  $J = 12.1, 9.1$  Hz, 1H), 3.15–3.08 (m, 1H), 2.98–2.86 (m, 2H);  $^{13}\text{C}$  NMR (125 MHz,  $\text{CD}_3\text{OHD}$ ):  $\delta$  153.93, 146.76, 138.76, 132.04, 127.23, 127.04, 127.00, 126.08, 123.84, 115.09, 113.25, 111.23, 47.23, 44.49, 38.93. HRMS (ESI)  $m/z$  calcd for  $\text{C}_{21}\text{H}_{22}\text{NO}^+$  ( $\text{M}+\text{H}$ ) $^+$  304.16959, found 304.16980. Enantiomeric excess was determined by chiral HPLC: Chiralpak IA-3 column, Hex/IPA = 90:10, 1 mL/min, 220 nm, 16.17 min (major), 20.48 min (minor).

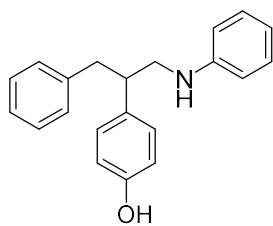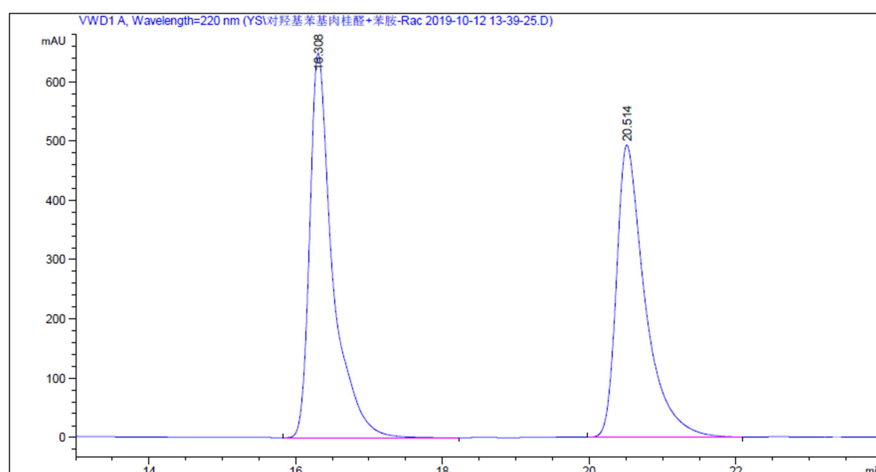

| 峰 # | 保留时间 [min] | 类型 | 峰宽 [min] | 峰面积 [mAU*s] | 峰高 [mAU]  | 峰面积 %   |
|-----|------------|----|----------|-------------|-----------|---------|
| 1   | 16.308     | BB | 0.3157   | 1.41043e4   | 648.59125 | 51.3497 |
| 2   | 20.514     | VV | 0.3961   | 1.33628e4   | 493.23627 | 48.6503 |

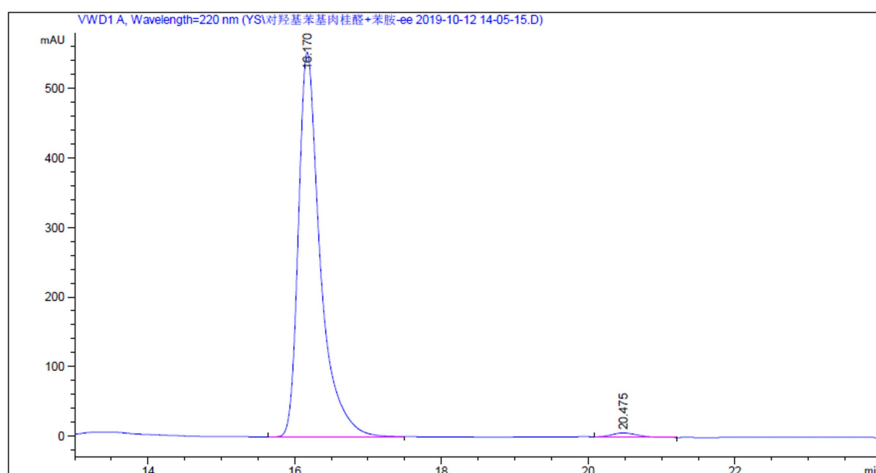

| 峰 # | 保留时间 [min] | 类型 | 峰宽 [min] | 峰面积 [mAU*s] | 峰高 [mAU]  | 峰面积 %   |
|-----|------------|----|----------|-------------|-----------|---------|
| 1   | 16.170     | BV | 0.3073   | 1.14380e4   | 553.03314 | 98.5934 |
| 2   | 20.475     | VB | 0.3918   | 163.18629   | 6.48101   | 1.4066  |

**Supplementary Figure 8.** HPLC spectra for racemic and chiral **3e**.

***N*-(2-(4-chlorophenyl)-3-phenylpropyl)aniline (3f)**: 98% yield, 97% ee, colorless oil. <sup>1</sup>H

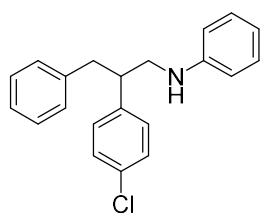

NMR (500 MHz, CDCl<sub>3</sub>): δ 7.27–6.99 (m, 11H), 6.66 (t, *J* = 7.3 Hz, 1H), 6.43 (d, *J* = 8.0 Hz, 2H), 3.43 (dd, *J* = 12.2, 4.9 Hz, 2H), 3.26–3.11 (m, 2H), 3.02–2.84 (m, 2H); <sup>13</sup>C NMR (125 MHz, CDCl<sub>3</sub>): δ 147.85, 141.18, 139.50, 132.58, 129.34, 129.13, 128.87, 128.46, 126.37, 117.67, 113.11, 48.68, 46.59, 40.99. HRMS (ESI) *m/z* calcd for C<sub>21</sub>H<sub>21</sub>ClN<sup>+</sup> (M+H)<sup>+</sup> 322.13570, found 322.13586. Enantiomeric excess was

determined by chiral HPLC: Chiralpak IB–3 column, Hex/IPA=95:5, 1 mL/min, 220 nm, 9.90 min (minor), 11.04 min (major).

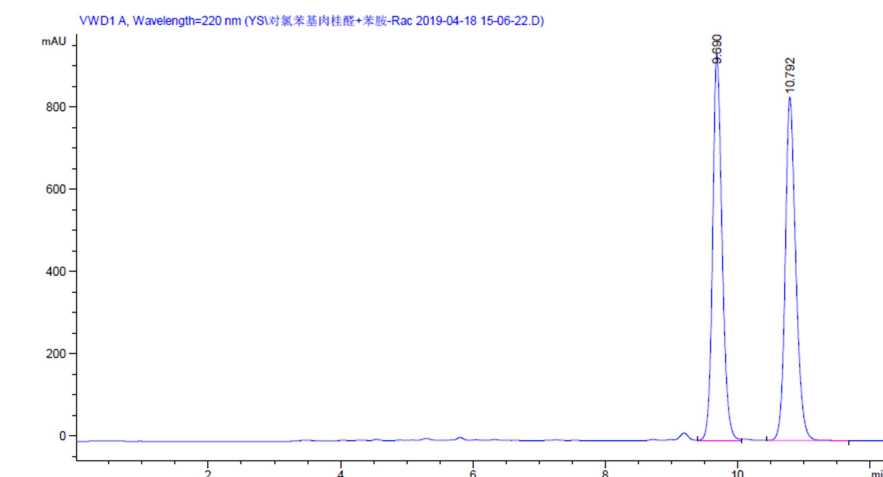

| 峰 # | 保留时间 [min] | 类型 | 峰宽 [min] | 峰面积 [mAU*s] | 峰高 [mAU]  | 峰面积 %   |
|-----|------------|----|----------|-------------|-----------|---------|
| 1   | 9.690      | BV | 0.1490   | 9270.61230  | 940.41315 | 50.0575 |
| 2   | 10.792     | VB | 0.1674   | 9249.30859  | 834.14990 | 49.9425 |

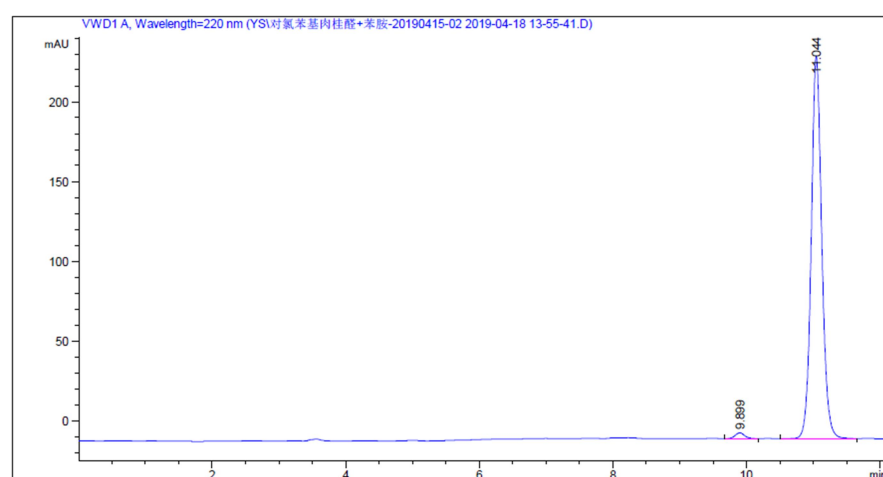

| 峰 # | 保留时间 [min] | 类型 | 峰宽 [min] | 峰面积 [mAU*s] | 峰高 [mAU]  | 峰面积 %   |
|-----|------------|----|----------|-------------|-----------|---------|
| 1   | 9.899      | VV | 0.1548   | 38.92135    | 3.78913   | 1.4568  |
| 2   | 11.044     | BV | 0.1682   | 2632.84131  | 239.59183 | 98.5432 |

**Supplementary Figure 9.** HPLC spectra for racemic and chiral **3f**.

***N*-(3-phenyl-2-(4-(trifluoromethyl)phenyl)propyl)aniline (3g)**: 98% yield, 97% ee, colorless oil. <sup>1</sup>H NMR (500 MHz, CDCl<sub>3</sub>): δ 7.66 (d, *J* = 7.7 Hz, 2H), 7.41–7.26 (m, 5H), 7.24 (t, *J* = 7.9 Hz, 2H), 7.19–7.14 (m, 2H), 6.80 (t, *J* = 7.3 Hz, 1H), 6.56 (d, *J* = 8.2 Hz, 2H), 3.58 (dd, *J* = 19.1, 9.5 Hz, 2H), 3.45–3.32 (m, 2H), 3.19–3.00 (m, 2H); <sup>13</sup>C NMR (125 MHz, CDCl<sub>3</sub>): δ 147.72, 147.01, 139.28, 129.39, 129.33, 129.12, 129.07, 128.54, 128.36, 126.50, 125.67 (q, *J* = 3.7 Hz), 125.41, 123.25, 117.77, 113.09, 48.58, 47.06, 40.81. HRMS (ESI) *m/z* calcd for C<sub>22</sub>H<sub>21</sub>F<sub>3</sub>N<sup>+</sup> (M+H)<sup>+</sup> 356.16206, found 356.16217. Enantiomeric excess was determined by chiral HPLC: Chiralpak IB–3 column, Hex/IPA=95:5, 1 mL/min, 220 nm, 13.10 min (minor), 14.49 min (major).

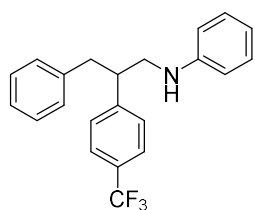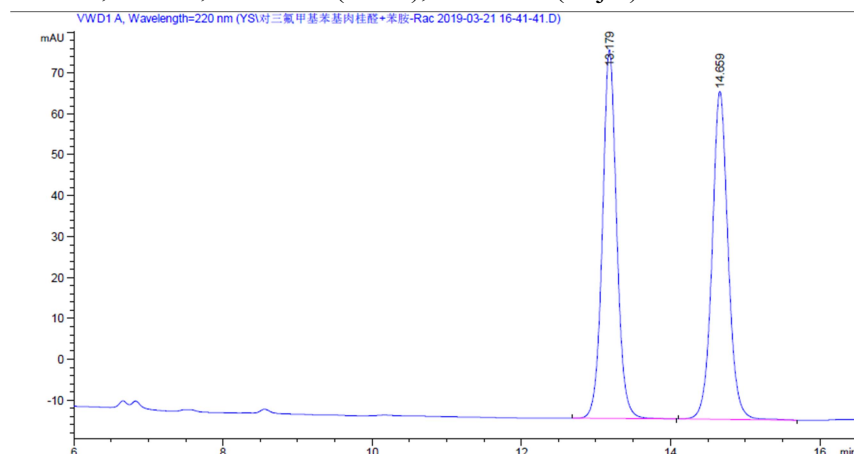

| 峰 # | 保留时间 [min] | 类型 | 峰宽 [min] | 峰面积 [mAU*s] | 峰高 [mAU] | 峰面积 %   |
|-----|------------|----|----------|-------------|----------|---------|
| 1   | 13.179     | BB | 0.2010   | 1197.93445  | 90.14127 | 50.0599 |
| 2   | 14.659     | BB | 0.2259   | 1195.06787  | 80.19238 | 49.9401 |

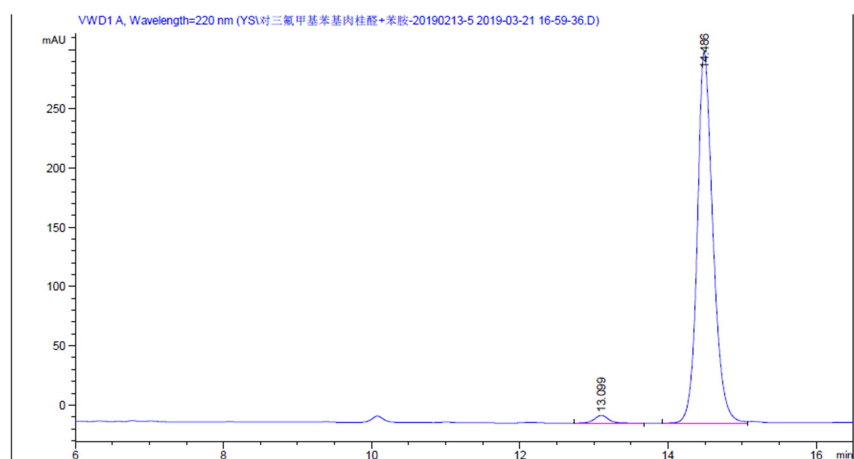

| 峰 # | 保留时间 [min] | 类型 | 峰宽 [min] | 峰面积 [mAU*s] | 峰高 [mAU]  | 峰面积 %   |
|-----|------------|----|----------|-------------|-----------|---------|
| 1   | 13.099     | VB | 0.1957   | 83.05169    | 6.47145   | 1.7682  |
| 2   | 14.486     | BV | 0.2199   | 4613.85059  | 313.09222 | 98.2318 |

**Supplementary Figure 10.** HPLC spectra for racemic and chiral **3g**.

***N*-(2-(3-methoxyphenyl)-3-phenylpropyl)aniline (3h)**: 98% yield, 98% ee, colorless oil. <sup>1</sup>H NMR (500 MHz, CDCl<sub>3</sub>): 7.28–7.14 (m, 4H), 7.14–7.06 (m, 4H), 6.82–6.73 (m, 2H), 6.73–6.62 (m, 2H), 6.43 (t, *J* = 6.0 Hz, 2H), 3.77–3.71 (m, 3H), 3.61–3.38 (m, 2H), 3.27–3.11 (m, 2H), 2.97 (t, *J* = 6.6 Hz, 2H); <sup>13</sup>C NMR (125 MHz, CDCl<sub>3</sub>): δ 159.89, 148.04, 144.45, 139.92, 129.73, 129.26, 129.16, 128.40, 126.25, 120.23, 117.47, 113.89, 113.12, 112.06, 55.24, 48.56, 47.10, 41.02. HRMS (ESI) *m/z* calcd for C<sub>22</sub>H<sub>24</sub>NO<sup>+</sup> (M+H)<sup>+</sup> 318.18524, found 318.18509. Enantiomeric excess was determined by chiral HPLC: Chiralpak IB–3 column, Hex/IPA=95:5, 1 mL/min, 220 nm, 10.11 min (major), 11.13 min (minor).

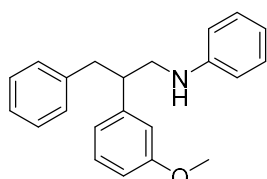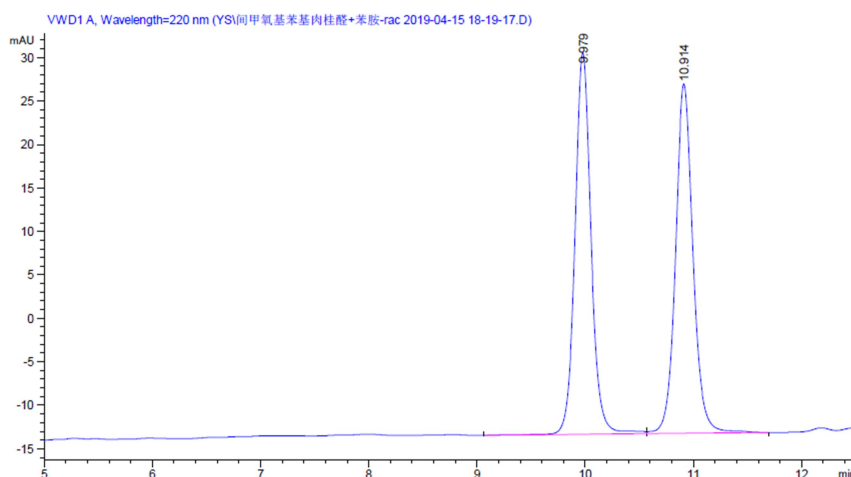

| 峰 # | 保留时间 [min] | 类型 | 峰宽 [min] | 峰面积 [mAU*s] | 峰高 [mAU] | 峰面积 %   |
|-----|------------|----|----------|-------------|----------|---------|
| 1   | 9.979      | BV | 0.1564   | 453.24146   | 43.92325 | 50.0865 |
| 2   | 10.914     | VB | 0.1711   | 451.67603   | 40.18555 | 49.9135 |

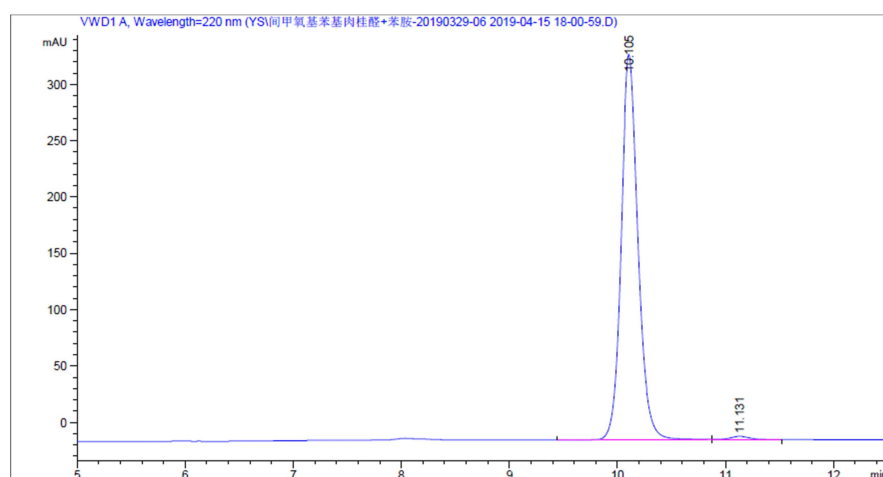

| 峰 # | 保留时间 [min] | 类型 | 峰宽 [min] | 峰面积 [mAU*s] | 峰高 [mAU]  | 峰面积 %   |
|-----|------------|----|----------|-------------|-----------|---------|
| 1   | 10.105     | BV | 0.1637   | 3686.14868  | 342.07248 | 98.9467 |
| 2   | 11.131     | VV | 0.1983   | 39.24051    | 2.96728   | 1.0533  |

**Supplementary Figure 11.** HPLC spectra for racemic and chiral **3h**.

***N*-(3-(1-phenyl-3-(phenylamino)propan-2-yl)phenyl)acetamide (3i)**: 91% yield, 95% ee, colorless oil.  $^1\text{H}$  NMR (500 MHz,  $\text{CDCl}_3$ ):  $\delta$  7.48 (s, 1H), 7.44–7.38 (m, 1H), 7.32 (s, 1H), 7.27–7.19 (m, 4H), 7.19–7.13 (m, 1H), 7.13–7.04 (m, 4H), 6.91 (d,  $J = 7.6$  Hz, 1H), 6.65 (t,  $J = 7.3$  Hz, 1H), 6.42 (d,  $J = 8.0$  Hz, 2H), 3.50 (s, 1H), 3.41 (dd,  $J = 12.3, 4.9$  Hz, 1H), 3.23 (dd,  $J = 12.2, 8.9$  Hz, 1H), 3.20–3.10 (m, 1H), 2.96 (d,  $J = 7.3$  Hz, 2H), 2.12 (s, 3H);  $^{13}\text{C}$  NMR (125 MHz,  $\text{CDCl}_3$ ):  $\delta$  168.57, 147.93, 143.73, 139.75, 138.34, 129.31, 129.23, 129.10, 128.37, 126.23, 123.85, 119.15, 118.44, 117.42, 113.00, 48.47, 47.01, 40.91, 24.64. HRMS (ESI)  $m/z$  calcd for  $\text{C}_{23}\text{H}_{25}\text{N}_2\text{O}^+$  ( $\text{M}+\text{H}$ ) $^+$  345.19614, found 345.19608. Enantiomeric excess was determined by chiral HPLC: Chiralpak IA-3 column, Hex/IPA=90:10, 1 mL/min, 220 nm, 19.06 min (major), 21.66 min (minor).

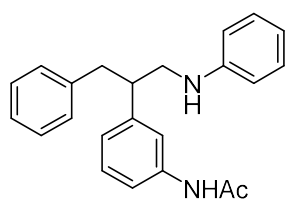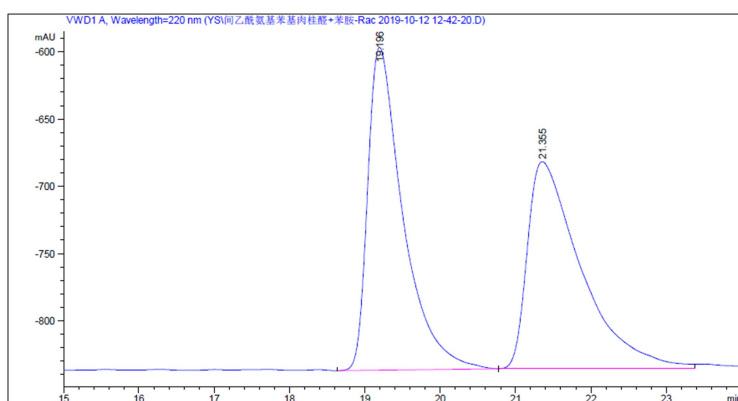

| 峰 # | 保留时间 [min] | 类型 | 峰宽 [min] | 峰面积 [mAU*s] | 峰高 [mAU]  | 峰面积 %   |
|-----|------------|----|----------|-------------|-----------|---------|
| 1   | 19.196     | BB | 0.4815   | 7799.98584  | 239.79781 | 50.5370 |
| 2   | 21.355     | BV | 0.7306   | 7634.20801  | 153.92505 | 49.4630 |

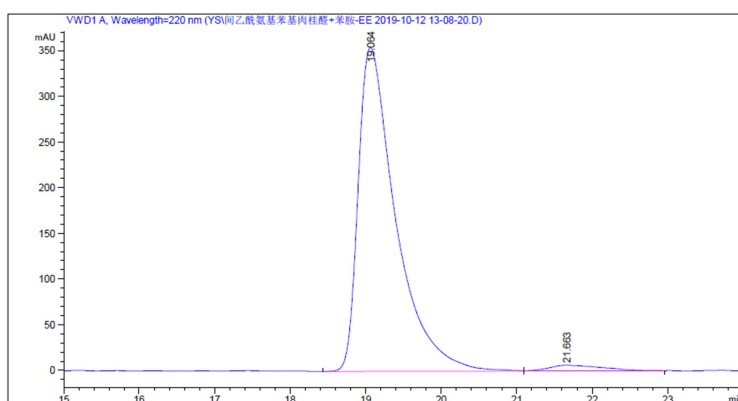

| 峰 # | 保留时间 [min] | 类型 | 峰宽 [min] | 峰面积 [mAU*s] | 峰高 [mAU]  | 峰面积 %   |
|-----|------------|----|----------|-------------|-----------|---------|
| 1   | 19.064     | BV | 0.5087   | 1.22374e4   | 354.50641 | 97.3088 |
| 2   | 21.663     | VV | 0.7995   | 338.44708   | 6.37347   | 2.6912  |

**Supplementary Figure 12.** HPLC spectra for racemic and chiral **3i**.

***N*-(2-(3,5-dimethylphenyl)-3-phenylpropyl)aniline (3j)**: 97% yield, 98% ee, colorless oil. <sup>1</sup>H NMR (500 MHz, CDCl<sub>3</sub>): δ 7.24 (t, *J* = 7.4 Hz, 2H), 7.21–7.04 (m, 5H), 6.87 (s, 1H), 6.80 (s, 2H), 6.65 (t, *J* = 7.3 Hz, 1H), 6.42 (d, *J* = 7.9 Hz, 2H), 3.39 (dd, *J* = 12.2, 4.9 Hz, 2H), 3.20 (dd, *J* = 12.2, 8.9 Hz, 1H), 3.15–3.06 (m, 1H), 3.02–2.88 (m, 2H), 2.28 (s, 6H); <sup>13</sup>C NMR (125 MHz, CDCl<sub>3</sub>): δ 148.02, 142.68, 140.08, 138.06, 129.10, 129.05, 128.47, 128.27, 126.09, 125.58, 117.29, 113.02, 48.32, 46.76, 41.14, 21.33. HRMS (ESI) *m/z* calcd for C<sub>23</sub>H<sub>26</sub>N<sup>+</sup> (M+H)<sup>+</sup> 316.20598, found 316.20593. Enantiomeric excess was determined by chiral HPLC: Chiralpak IB–3 column, Hex/IPA=99.2:0.8, 1 mL/min, 220 nm, 10.89 min (minor), 11.62 min (major).

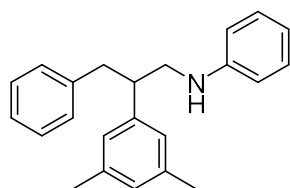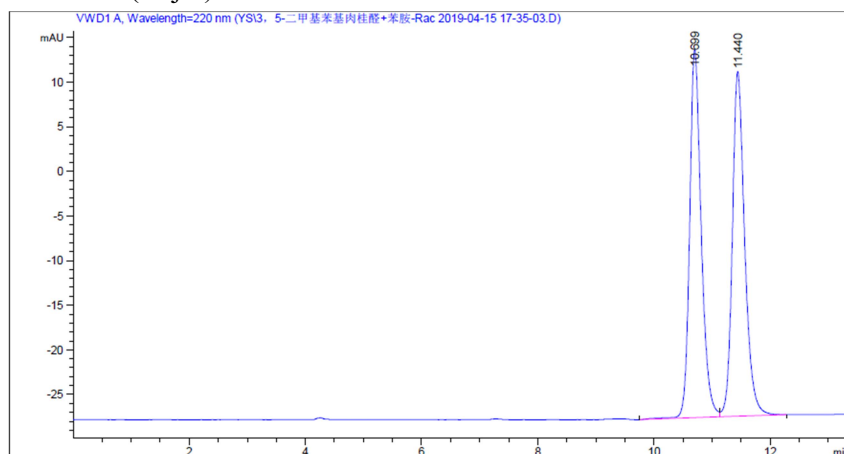

| 峰 # | 保留时间 [min] | 类型 | 峰宽 [min] | 峰面积 [mAU*s] | 峰高 [mAU] | 峰面积 %   |
|-----|------------|----|----------|-------------|----------|---------|
| 1   | 10.699     | BV | 0.2075   | 570.63269   | 41.23009 | 50.0493 |
| 2   | 11.440     | VB | 0.2220   | 569.50891   | 38.61846 | 49.9507 |

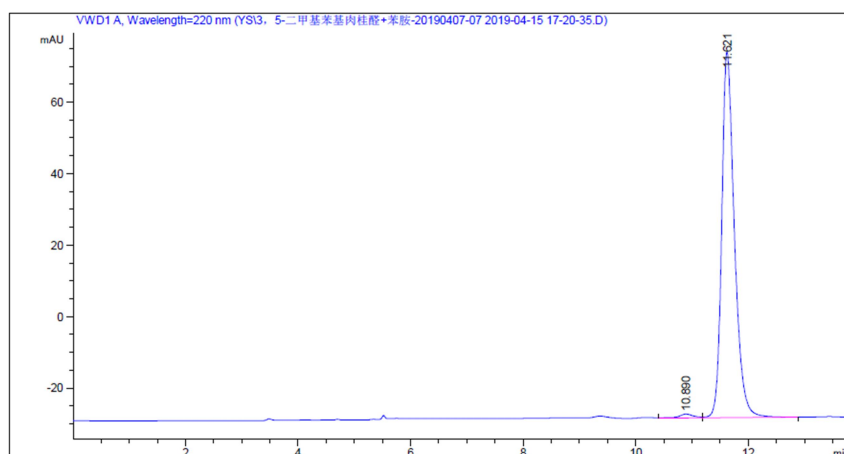

| 峰 # | 保留时间 [min] | 类型 | 峰宽 [min] | 峰面积 [mAU*s] | 峰高 [mAU]  | 峰面积 %   |
|-----|------------|----|----------|-------------|-----------|---------|
| 1   | 10.890     | VV | 0.2808   | 21.19745    | 1.09025   | 1.3048  |
| 2   | 11.621     | VB | 0.2348   | 1603.39832  | 102.33669 | 98.6952 |

**Supplementary Figure 13.** HPLC spectra for racemic and chiral **3j**.

**3-(1-phenyl-3-(phenylamino)propan-2-yl)benzonitrile (3k)**: 94% yield, 95% ee, colorless oil.

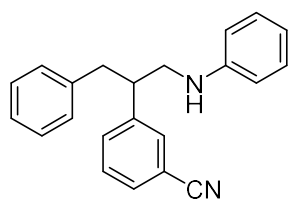

$^1\text{H}$  NMR (500 MHz,  $\text{CDCl}_3$ ):  $\delta$  7.54–7.45 (m, 1H), 7.42 (s, 1H), 7.40–7.34 (m, 2H), 7.27–7.20 (m, 2H), 7.20–7.15 (m, 1H), 7.13 (t,  $J$  = 8.5, 7.2 Hz, 2H), 7.03 (d,  $J$  = 6.8 Hz, 1H), 6.73–6.65 (m, 1H), 6.45 (d,  $J$  = 7.5 Hz, 2H), 3.55–3.40 (m, 2H), 3.33–3.19 (m, 2H), 3.04 (dd,  $J$  = 13.7, 6.7 Hz, 1H), 2.91 (dd,  $J$  = 13.7, 7.5 Hz, 1H);  $^{13}\text{C}$  NMR (125 MHz,  $\text{CDCl}_3$ ):  $\delta$  147.50, 144.30, 138.84, 132.57, 131.52, 130.62,

129.42, 129.36, 129.01, 128.52, 126.54, 118.86, 117.84, 113.00, 112.71, 48.51, 46.92, 40.64. HRMS (ESI)  $m/z$  calcd for  $\text{C}_{22}\text{H}_{21}\text{N}_2^+$  ( $\text{M}+\text{H}$ ) $^+$  313.16993, found 313.17020. Enantiomeric excess was determined by chiral HPLC: Chiralpak IB-3 column, Hex/IPA=80:20, 1 mL/min, 220 nm, 13.57 min (minor), 14.71 min (major).

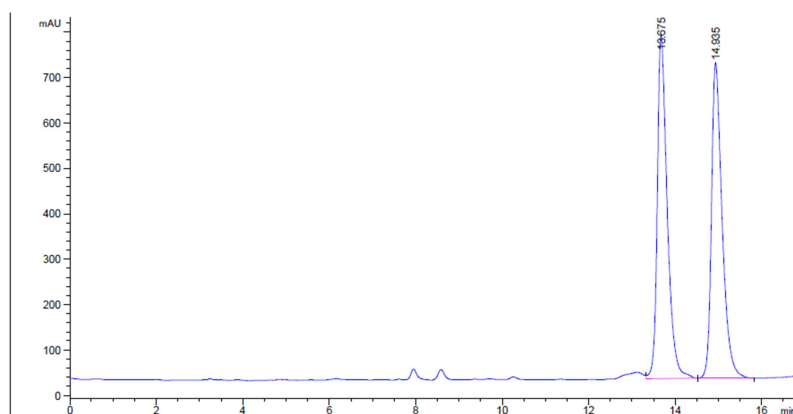

| 峰 # | 保留时间 [min] | 类型 | 峰宽 [min] | 峰面积 [mAU*s] | 峰高 [mAU]  | 峰面积 %   |
|-----|------------|----|----------|-------------|-----------|---------|
| 1   | 13.675     | VB | 0.2376   | 1.20504e4   | 757.48792 | 50.3621 |
| 2   | 14.935     | BB | 0.2554   | 1.18771e4   | 694.92328 | 49.6379 |

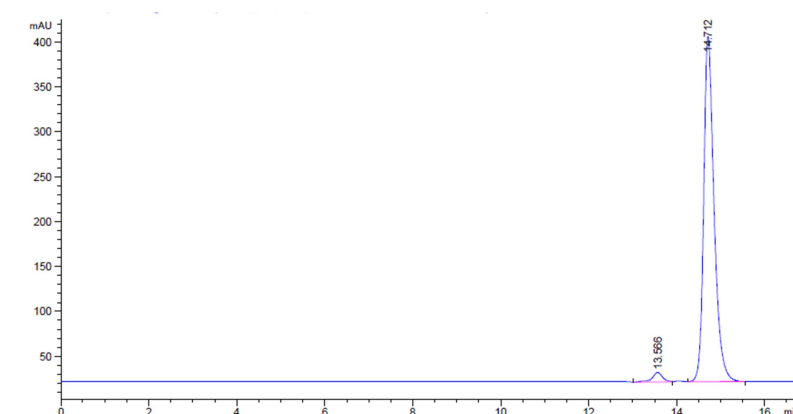

| 峰 # | 保留时间 [min] | 类型 | 峰宽 [min] | 峰面积 [mAU*s] | 峰高 [mAU]  | 峰面积 %   |
|-----|------------|----|----------|-------------|-----------|---------|
| 1   | 13.566     | BV | 0.2409   | 172.39459   | 10.59290  | 2.6691  |
| 2   | 14.712     | VB | 0.2459   | 6286.61426  | 384.10437 | 97.3309 |

**Supplementary Figure 14. HPLC spectra for racemic and chiral 3k.**



***N*-(3-phenyl-2-(*o*-tolyl)propyl)aniline (31)**: 94% yield, 96% ee, colorless oil.  $^1\text{H}$  NMR (500 MHz,  $\text{CDCl}_3$ ):  $\delta$  7.28 (d,  $J = 7.8$  Hz, 1H), 7.25–7.02 (m, 10H), 6.65 (t,  $J = 7.3$  Hz, 1H), 6.44 (d,  $J = 7.9$  Hz, 2H), 3.61–3.36 (m, 3H), 3.31 (dd,  $J = 11.9, 8.4$  Hz, 1H), 3.03–2.85 (m, 2H), 2.08 (s, 3H);  $^{13}\text{C}$  NMR (125 MHz,  $\text{CDCl}_3$ ):  $\delta$  148.19, 140.95, 140.08, 137.10, 130.64, 129.30, 129.15, 128.41, 126.58, 126.50, 126.27, 125.98, 117.51, 113.13, 48.31, 41.90, 41.45, 19.71. HRMS (ESI)  $m/z$  calcd for  $\text{C}_{22}\text{H}_{24}\text{N}^+$  ( $\text{M}+\text{H}$ ) $^+$  302.19033, found 302.19019. Enantiomeric excess was determined by chiral HPLC: Chiralpak IB–3 column, Hex/IPA=98:2, 1 mL/min, 220 nm, 11.01 min (minor), 12.01 min (major).

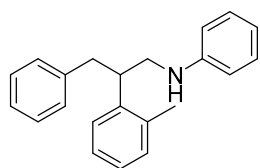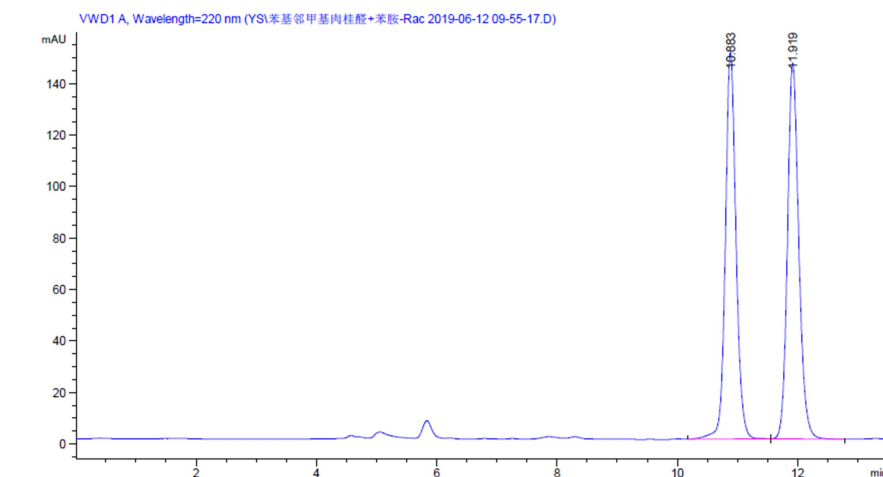

| 峰 # | 保留时间 [min] | 类型 | 峰宽 [min] | 峰面积 [mAU*s] | 峰高 [mAU]  | 峰面积 %   |
|-----|------------|----|----------|-------------|-----------|---------|
| 1   | 10.883     | VB | 0.1875   | 1850.68555  | 150.44888 | 49.2235 |
| 2   | 11.919     | BB | 0.1986   | 1909.07202  | 145.98317 | 50.7765 |

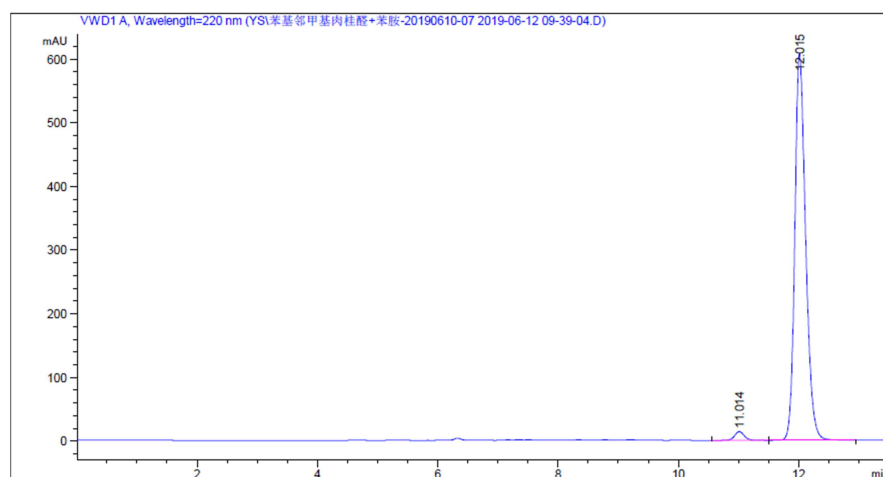

| 峰 # | 保留时间 [min] | 类型 | 峰宽 [min] | 峰面积 [mAU*s] | 峰高 [mAU]  | 峰面积 %   |
|-----|------------|----|----------|-------------|-----------|---------|
| 1   | 11.014     | BB | 0.1699   | 154.74762   | 13.89967  | 1.9958  |
| 2   | 12.015     | BV | 0.1901   | 7598.97803  | 606.95984 | 98.0042 |

**Supplementary Figure 15.** HPLC spectra for racemic and chiral **31**.

***N*-(2-(2-fluorophenyl)-3-phenylpropyl)aniline (3m)**: 88% yield, 97% ee, colorless oil. <sup>1</sup>H

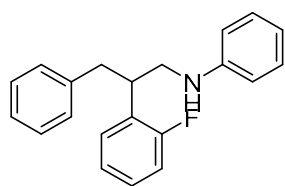

NMR (500 MHz, CDCl<sub>3</sub>): δ 7.29–6.96 (m, 11H), 6.66 (t, *J* = 7.3 Hz, 1H), 6.46 (d, *J* = 7.9 Hz, 2H), 3.60–3.32 (m, 4H), 3.08–2.95 (m, 2H); <sup>13</sup>C NMR (125 MHz, CDCl<sub>3</sub>): δ 162.42, 160.47, 148.04, 139.75, 129.51, 129.40, 129.30, 129.24, 129.12, 128.43, 128.38, 128.32, 126.33, 124.38, 124.36, 117.52, 115.91, 115.73, 113.01, 47.54, 41.17,

39.66. HRMS (ESI) *m/z* calcd for C<sub>21</sub>H<sub>21</sub>FN<sup>+</sup> (M+H)<sup>+</sup> 306.16525, found 306.16534. Enantiomeric excess was determined by chiral HPLC: Chiralpak IA–3 column, Hex/IPA=95:5, 1 mL/min, 220 nm, 7.26 min (minor), 7.87 min (major).

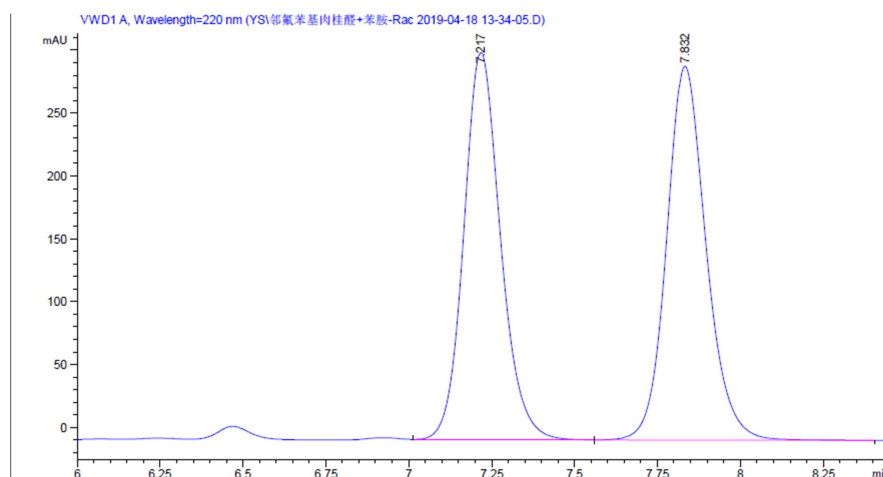

| 峰 # | 保留时间 [min] | 类型 | 峰宽 [min] | 峰面积 [mAU*s] | 峰高 [mAU]  | 峰面积 %   |
|-----|------------|----|----------|-------------|-----------|---------|
| 1   | 7.217      | VB | 0.1176   | 2362.55835  | 307.68054 | 49.0445 |
| 2   | 7.832      | BB | 0.1265   | 2454.61230  | 296.84650 | 50.9555 |

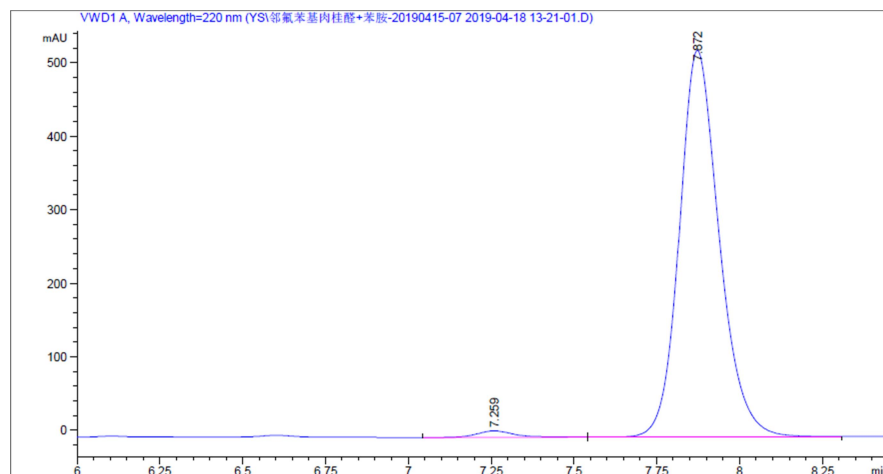

| 峰 # | 保留时间 [min] | 类型 | 峰宽 [min] | 峰面积 [mAU*s] | 峰高 [mAU]  | 峰面积 %   |
|-----|------------|----|----------|-------------|-----------|---------|
| 1   | 7.259      | BV | 0.1231   | 73.49397    | 8.82854   | 1.6354  |
| 2   | 7.872      | VV | 0.1280   | 4420.58057  | 526.37775 | 98.3646 |

**Supplementary Figure 16.** HPLC spectra for racemic and chiral **3m**.

**2-(2-chlorophenyl)-N-(4-methoxybenzyl)-3-phenylpropan-1-amine (3n):** 92% yield, 96%

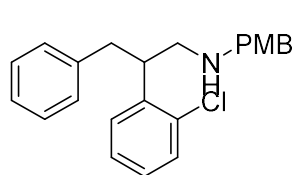

ee, colorless oil.  $^1\text{H}$  NMR (500 MHz,  $\text{CDCl}_3$ ):  $\delta$  7.32 (dd,  $J = 7.9, 1.4$  Hz, 1H), 7.27–7.05 (m, 8H), 6.70 (d,  $J = 8.9$  Hz, 2H), 6.41 (d,  $J = 9.0$  Hz, 2H), 3.93–3.78 (m, 1H), 3.67 (s, 3H), 3.40–3.25 (m, 2H), 3.18 (s, 1H), 3.02–2.83 (m, 2H);  $^{13}\text{C}$  NMR (125 MHz,  $\text{CDCl}_3$ ):  $\delta$  152.22, 142.35, 140.19, 139.57, 134.81, 129.98, 129.21, 128.46, 128.10,

127.92, 127.25, 126.38, 114.92, 114.32, 55.87, 48.43, 42.72, 40.09. HRMS (ESI)  $m/z$  calcd for  $\text{C}_{22}\text{H}_{23}\text{ClNO}^+$  ( $\text{M}+\text{H}$ ) $^+$  352.14627, found 352.14603. Enantiomeric excess was determined by chiral HPLC: Chiralpak AS-H column, Hex/IPA=95:5, 1 mL/min, 220 nm, 9.83 min (minor), 10.62 min (major).

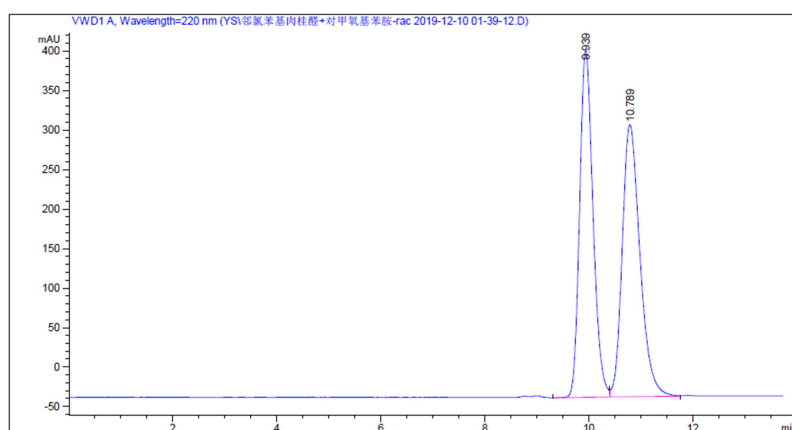

| 峰 # | 保留时间 [min] | 类型 | 峰宽 [min] | 峰面积 [mAU*s] | 峰高 [mAU]  | 峰面积 %   |
|-----|------------|----|----------|-------------|-----------|---------|
| 1   | 9.939      | BV | 0.2755   | 7843.07959  | 438.90320 | 49.0480 |
| 2   | 10.789     | VV | 0.3631   | 8147.53174  | 344.22058 | 50.9520 |

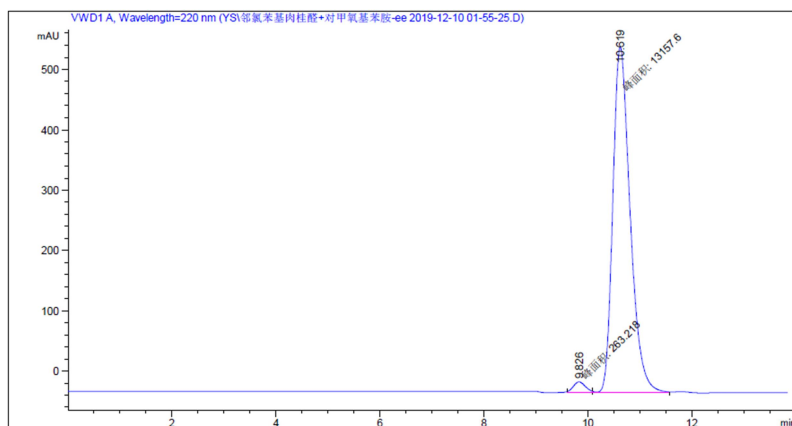

| 峰 # | 保留时间 [min] | 类型 | 峰宽 [min] | 峰面积 [mAU*s] | 峰高 [mAU]  | 峰面积 %   |
|-----|------------|----|----------|-------------|-----------|---------|
| 1   | 9.826      | MF | 0.2613   | 263.21762   | 16.78812  | 1.9613  |
| 2   | 10.619     | FM | 0.3834   | 1.31576e4   | 572.04242 | 98.0387 |

**Supplementary Figure 17.** HPLC spectra for racemic and chiral **3n**.

***N*-(2-(naphthalen-2-yl)-3-phenylpropyl)aniline (3o)**: 95% yield, 98% ee, colorless oil. <sup>1</sup>H

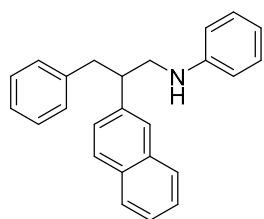

NMR (500 MHz, CDCl<sub>3</sub>): δ 7.83–7.69 (m, 3H), 7.58 (s, 1H), 7.47–7.37 (m, 2H), 7.32 (dd, *J* = 8.5, 1.9 Hz, 1H), 7.20 (t, *J* = 7.3 Hz, 2H), 7.17–7.05 (m, 5H), 6.65 (t, *J* = 7.3 Hz, 1H), 6.42 (d, *J* = 7.9 Hz, 2H), 3.75–3.43 (m, 2H), 3.40–3.28 (m, 2H), 3.06 (d, *J* = 6.5 Hz, 2H).; <sup>13</sup>C NMR (125 MHz, CDCl<sub>3</sub>): δ 147.85, 140.00, 139.72, 133.48, 132.53, 129.14, 129.03, 128.41, 128.28, 127.62, 127.61, 126.75, 126.14,

126.06, 125.75, 125.56, 117.41, 113.01, 48.43, 47.09, 40.95. HRMS (ESI) *m/z* calcd for C<sub>25</sub>H<sub>24</sub>N<sup>+</sup> (M+H)<sup>+</sup> 338.19033, found 338.19052. Enantiomeric excess was determined by chiral HPLC: Chiralpak IB-3 column, Hex/IPA=95:5, 1 mL/min, 220 nm, 10.29 min (minor), 11.19 min (major).

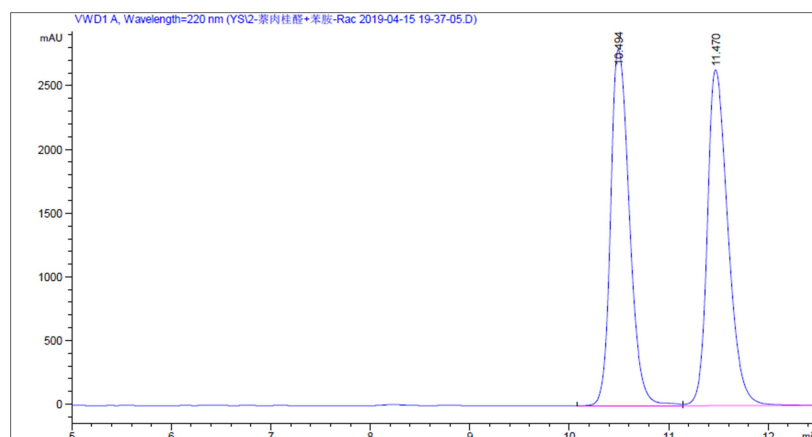

| 峰 # | 保留时间 [min] | 类型 | 峰宽 [min] | 峰面积 [mAU*s] | 峰高 [mAU]   | 峰面积 %   |
|-----|------------|----|----------|-------------|------------|---------|
| 1   | 10.494     | BV | 0.2038   | 3.68553e4   | 2795.11304 | 49.2628 |
| 2   | 11.470     | VB | 0.2221   | 3.79584e4   | 2633.85449 | 50.7372 |

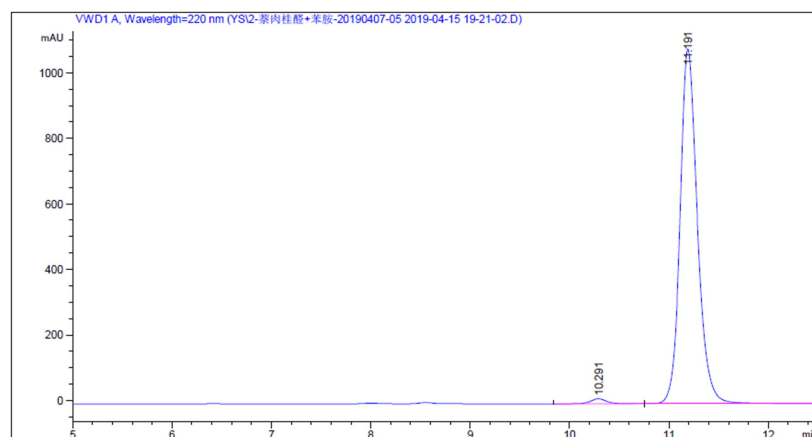

| 峰 # | 保留时间 [min] | 类型 | 峰宽 [min] | 峰面积 [mAU*s] | 峰高 [mAU]   | 峰面积 %   |
|-----|------------|----|----------|-------------|------------|---------|
| 1   | 10.291     | BB | 0.1673   | 169.46053   | 15.53405   | 1.2746  |
| 2   | 11.191     | BV | 0.1834   | 1.31261e4   | 1082.87939 | 98.7254 |

**Supplementary Figure 18.** HPLC spectra for racemic and chiral **3o**.

***N*-(2-(naphthalen-1-yl)-3-phenylpropyl)aniline (3p)**: 95% yield, 96% ee, colorless oil. <sup>1</sup>H

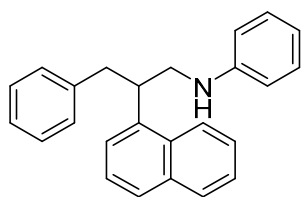

NMR (500 MHz, CDCl<sub>3</sub>): δ 8.11–7.99 (m, 1H), 7.89–7.82 (m, 1H), 7.76 (d, *J* = 7.6 Hz, 1H), 7.58–7.37 (m, 4H), 7.28–7.11 (m, 5H), 7.08 (t, *J* = 7.7 Hz, 2H), 6.64 (t, *J* = 7.3 Hz, 1H), 6.38 (d, *J* = 8.0 Hz, 2H), 4.20–4.05 (m, 1H), 3.55 (dd, *J* = 12.3, 5.3 Hz, 1H), 3.52–3.30 (m, 2H), 3.21–2.99 (m, 2H); <sup>13</sup>C NMR (125 MHz, CDCl<sub>3</sub>): δ 147.96,

139.89, 138.79, 134.02, 132.12, 129.10, 129.08, 129.00, 128.36, 127.26, 126.24, 126.07, 125.56, 125.52, 122.90, 117.32, 112.88, 47.71, 40.89. HRMS (ESI) *m/z* calcd for C<sub>25</sub>H<sub>24</sub>N<sup>+</sup> (M+H)<sup>+</sup> 338.19033, found 338.19019. Enantiomeric excess was determined by chiral HPLC: Chiralpak IB-3 column, Hex/IPA=95:5, 1 mL/min, 220 nm, 14.88 min (minor), 16.27 min (major).

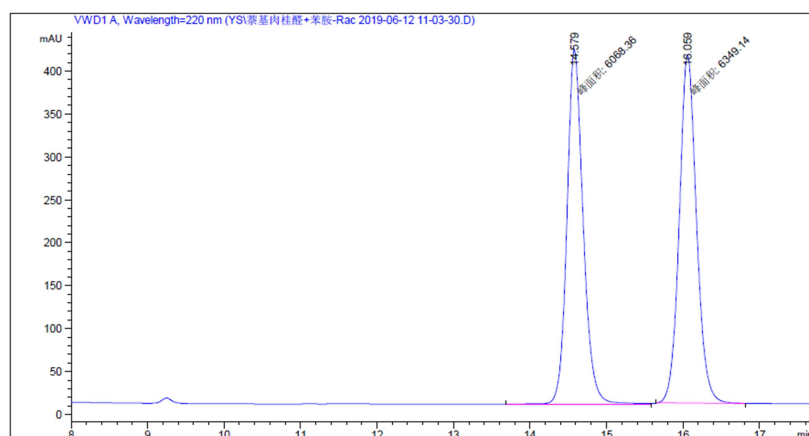

| 峰 # | 保留时间 [min] | 类型 | 峰宽 [min] | 峰面积 [mAU*s] | 峰高 [mAU]  | 峰面积 %   |
|-----|------------|----|----------|-------------|-----------|---------|
| 1   | 14.579     | MM | 0.2452   | 6068.35693  | 412.50659 | 48.8694 |
| 2   | 16.059     | MM | 0.2610   | 6349.13867  | 405.41147 | 51.1306 |

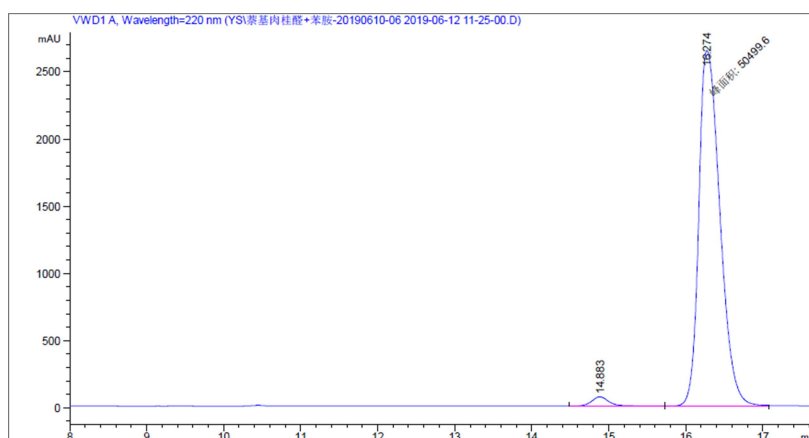

| 峰 # | 保留时间 [min] | 类型 | 峰宽 [min] | 峰面积 [mAU*s] | 峰高 [mAU]   | 峰面积 %   |
|-----|------------|----|----------|-------------|------------|---------|
| 1   | 14.883     | VB | 0.2332   | 1054.66724  | 68.65220   | 2.0457  |
| 2   | 16.274     | MF | 0.3182   | 5.04996e4   | 2644.81958 | 97.9543 |

**Supplementary Figure 19.** HPLC spectra for racemic and chiral **3p**.

***N*-(3-phenyl-2-(thiophen-2-yl)propyl)aniline (3q)**: 95% yield, 95% ee, colorless oil. <sup>1</sup>H NMR (500 MHz, CDCl<sub>3</sub>): δ 7.25 (t, *J* = 7.4 Hz, 2H), 7.22–7.15 (m, 2H), 7.15–7.07 (m, 4H), 6.92 (dd, *J* = 5.2, 3.4 Hz, 1H), 6.78 (d, *J* = 3.4 Hz, 1H), 6.67 (t, *J* = 7.3 Hz, 1H), 6.45 (d, *J* = 7.9 Hz, 2H), 3.65 (s, 1H), 3.55–3.41 (m, 2H), 3.22 (dd, *J* = 12.4, 8.2 Hz, 1H), 3.03 (d, *J* = 7.3 Hz, 2H); <sup>13</sup>C NMR (125 MHz, CDCl<sub>3</sub>): δ 147.71, 146.37, 139.36, 129.18, 128.99, 128.33, 126.72, 126.32, 124.71, 123.71, 117.52, 113.08, 49.33, 42.50, 41.72. HRMS (ESI) *m/z* calcd for C<sub>19</sub>H<sub>20</sub>NS<sup>+</sup> (M+H)<sup>+</sup> 294.13110, found 294.13116. Enantiomeric excess was determined by chiral HPLC: Chiralpak IB–3 column, Hex/IPA=95:5, 1 mL/min, 220 nm, 7.52 min (minor), 8.24 min (major).

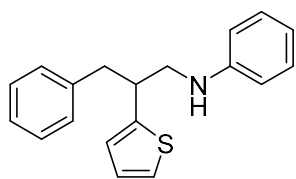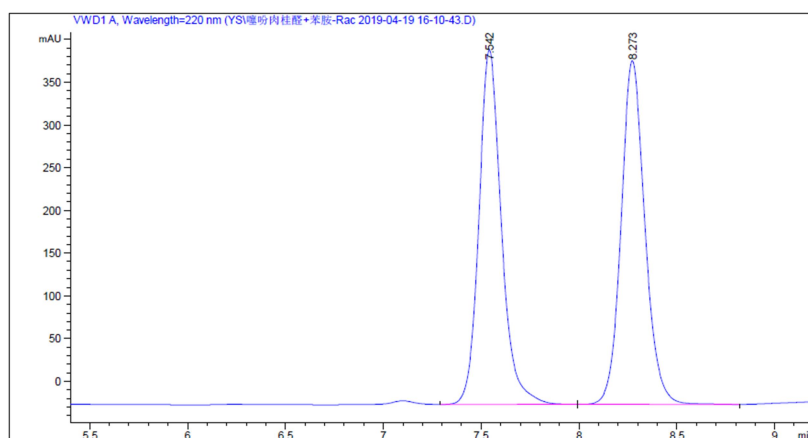

| 峰 # | 保留时间 [min] | 类型 | 峰宽 [min] | 峰面积 [mAU*s] | 峰高 [mAU]  | 峰面积 %   |
|-----|------------|----|----------|-------------|-----------|---------|
| 1   | 7.542      | VB | 0.1214   | 3319.08691  | 414.49908 | 49.3874 |
| 2   | 8.273      | BB | 0.1288   | 3401.42725  | 401.82404 | 50.6126 |

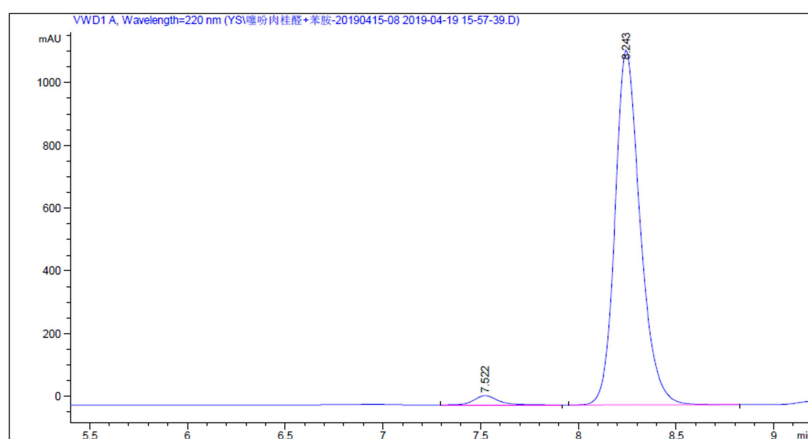

| 峰 # | 保留时间 [min] | 类型 | 峰宽 [min] | 峰面积 [mAU*s] | 峰高 [mAU]   | 峰面积 %   |
|-----|------------|----|----------|-------------|------------|---------|
| 1   | 7.522      | VB | 0.1276   | 253.25006   | 29.67105   | 2.4444  |
| 2   | 8.243      | BB | 0.1353   | 1.01071e4   | 1130.37097 | 97.5556 |

**Supplementary Figure 20.** HPLC spectra for racemic and chiral **3q**.

***N*-(2-methyl-3-phenylpropyl)aniline (3r)**: 92% yield, 94% ee, colorless oil.  $^1\text{H}$  NMR(500 MHz,  $\text{CDCl}_3$ ):  $\delta$  7.27 (t,  $J = 7.4$  Hz, 2H), 7.22–7.09 (m, 5H), 6.67 (t,  $J = 7.3$  Hz, 1H), 6.52 (d,  $J = 7.9$  Hz, 2H), 3.65 (s, 1H), 3.07 (dd,  $J = 12.5, 6.0$  Hz, 1H), 2.93 (dd,  $J = 12.5, 7.0$  Hz, 1H), 2.74 (dd,  $J = 13.5, 6.4$  Hz, 1H), 2.48 (dd,  $J = 13.5, 7.8$  Hz, 1H), 2.14–1.98 (m, 1H), 0.96 (d,  $J = 6.8$  Hz, 3H);  $^{13}\text{C}$  NMR (125 MHz,  $\text{CDCl}_3$ ):  $\delta$  148.35, 140.47, 129.17, 129.10, 128.26, 125.93, 117.08, 112.72, 49.85, 41.36, 35.00, 18.04. Enantiomeric excess was determined by chiral HPLC: Chiralpak IB–3 column, Hex/IPA=98:2, 1 mL/min, 220 nm, 7.69 min (minor), 8.11 min (major).

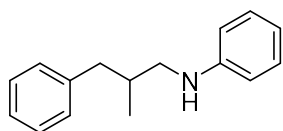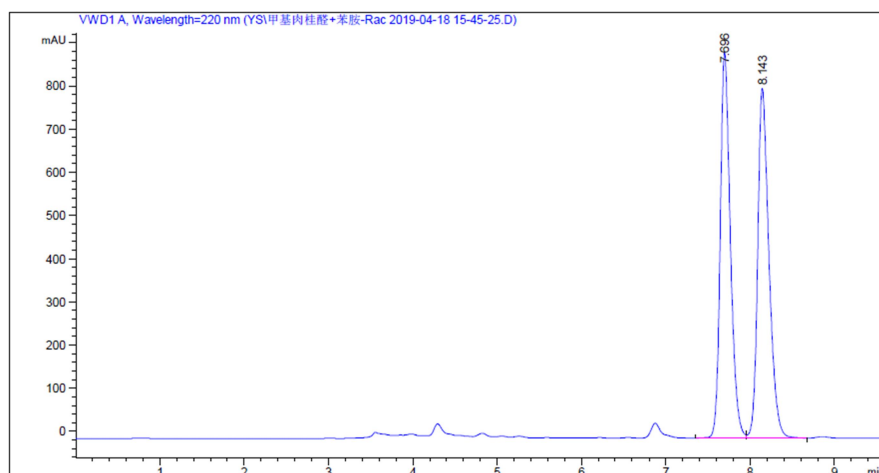

| 峰 # | 保留时间 [min] | 类型 | 峰宽 [min] | 峰面积 [mAU*s] | 峰高 [mAU]  | 峰面积 %   |
|-----|------------|----|----------|-------------|-----------|---------|
| 1   | 7.696      | BV | 0.1271   | 7431.67188  | 892.74091 | 49.8292 |
| 2   | 8.143      | VB | 0.1398   | 7482.60840  | 809.60950 | 50.1708 |

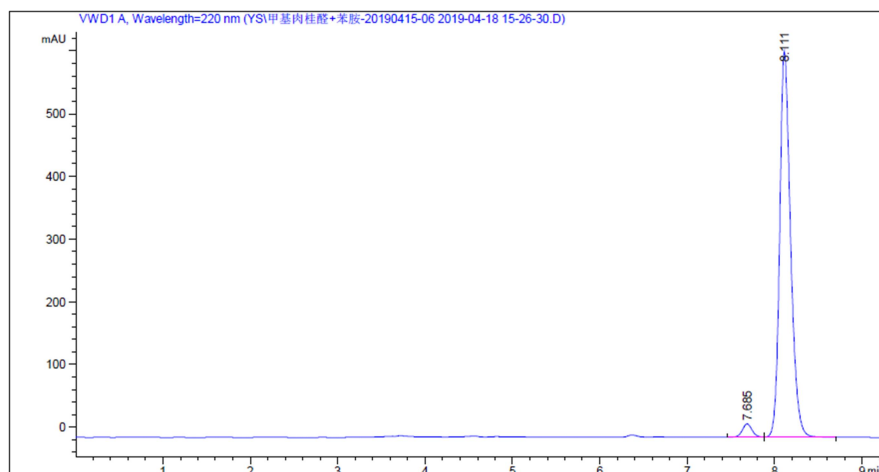

| 峰 # | 保留时间 [min] | 类型 | 峰宽 [min] | 峰面积 [mAU*s] | 峰高 [mAU]  | 峰面积 %   |
|-----|------------|----|----------|-------------|-----------|---------|
| 1   | 7.685      | BV | 0.1207   | 166.50104   | 21.42282  | 3.0359  |
| 2   | 8.111      | VV | 0.1308   | 5317.93506  | 615.53784 | 96.9641 |

**Supplementary Figure 21.** HPLC spectra for racemic and chiral **3r**.

***N*-(2-phenyl-3-(*p*-tolyl)propyl)aniline (**3s**):** 92% yield, 99% ee, colorless oil.  $^1\text{H}$  NMR(500 MHz,  $\text{CDCl}_3$ ):  $\delta$  7.29 (t,  $J = 7.6$  Hz, 2H), 7.24–7.14 (m, 3H), 7.13–7.06 (m, 2H), 7.03 (d,  $J = 7.8$  Hz, 2H), 6.97 (d,  $J = 8.1$  Hz, 2H), 6.65 (t,  $J = 7.4$  Hz, 1H), 6.46–6.40 (m, 2H), 3.54–3.38 (m, 2H), 3.23 (dd,  $J = 12.1, 8.9$  Hz, 1H), 2.94 (d,  $J = 7.3$  Hz, 2H), 2.29 (s, 3H);  $^{13}\text{C}$  NMR (125 MHz,  $\text{CDCl}_3$ ):  $\delta$  147.96, 142.73, 136.66, 135.53, 129.11, 128.94, 128.89, 128.60, 127.84, 126.73, 117.30, 112.96, 48.45, 46.96, 40.56, 20.99. HRMS (ESI)  $m/z$  calcd for  $\text{C}_{22}\text{H}_{24}\text{N}^+$  ( $\text{M}+\text{H}$ ) $^+$  302.19033, found 302.19049. Enantiomeric excess was determined by chiral HPLC: Chiralpak IA–3 column, Hex/IPA=90:10, 1 mL/min, 220 nm, 5.16 min (minor), 5.94 min (major).

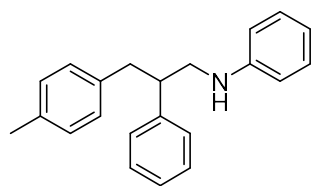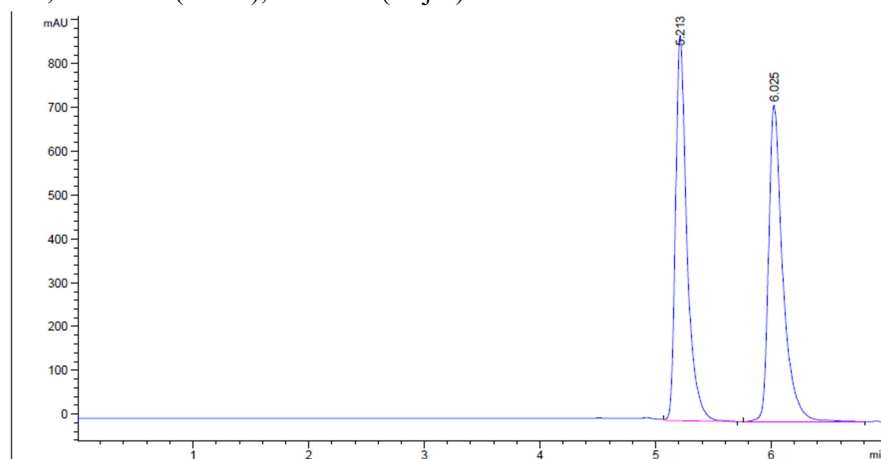

| 峰 # | 保留时间 [min] | 类型 | 峰宽 [min] | 峰面积 [mAU*s] | 峰高 [mAU]  | 峰面积 %   |
|-----|------------|----|----------|-------------|-----------|---------|
| 1   | 5.213      | VB | 0.1017   | 6011.88379  | 879.87762 | 49.4247 |
| 2   | 6.025      | BB | 0.1253   | 6151.84668  | 722.65240 | 50.5753 |

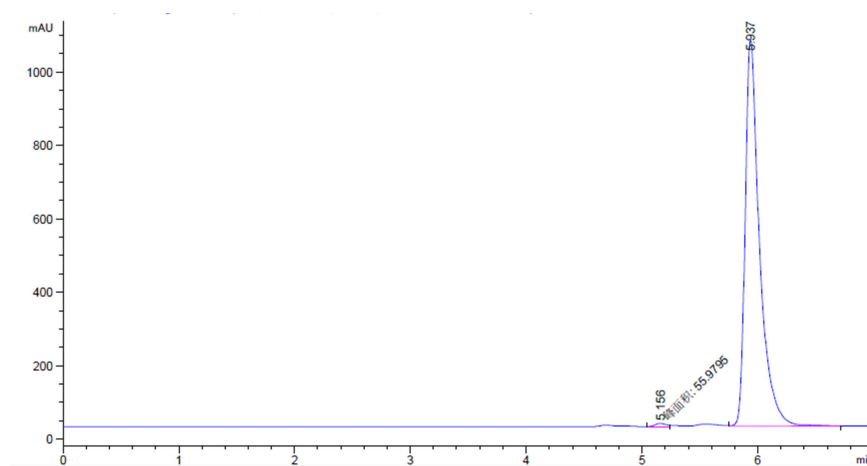

| 峰 # | 保留时间 [min] | 类型 | 峰宽 [min] | 峰面积 [mAU*s] | 峰高 [mAU]   | 峰面积 %   |
|-----|------------|----|----------|-------------|------------|---------|
| 1   | 5.156      | MF | 0.1063   | 55.97951    | 8.77294    | 0.6119  |
| 2   | 5.937      | VB | 0.1269   | 9092.93359  | 1051.77014 | 99.3881 |

**Supplementary Figure 22.** HPLC spectra for racemic and chiral **3s**.



***N*-(3-(4-(*tert*-butyl)phenyl)-2-phenylpropyl)aniline (3t):** 97% yield, 98% ee, colorless oil.<sup>1</sup>H

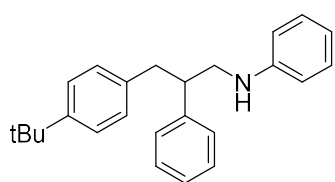

NMR(500 MHz, CDCl<sub>3</sub>): δ 7.47–7.29 (m, 7H), 7.24–7.14 (m, 4H), 6.77 (t, *J* = 7.3 Hz, 1H), 6.52 (d, *J* = 8.0 Hz, 2H), 3.56 (dd, *J* = 12.1, 4.8 Hz, 2H), 3.41–3.25 (m, 2H), 3.15–3.01 (m, 2H), 1.42 (s, 9H); <sup>13</sup>C NMR (125 MHz, CDCl<sub>3</sub>): δ148.91, 147.91, 143.01, 136.77, 129.07, 128.66, 128.61, 127.78, 126.71, 125.15, 117.26,

112.93, 48.46, 46.80, 40.47, 34.32, 31.36. HRMS (ESI) *m/z* calcd for C<sub>25</sub>H<sub>30</sub>N<sup>+</sup> (M+H)<sup>+</sup> 344.23728, found 344.23737. Enantiomeric excess was determined by chiral HPLC: Chiralpak IA–3 column, Hex/IPA=99:1, 1 mL/min, 220 nm, 5. 65 min (minor), 7. 15 min (major).

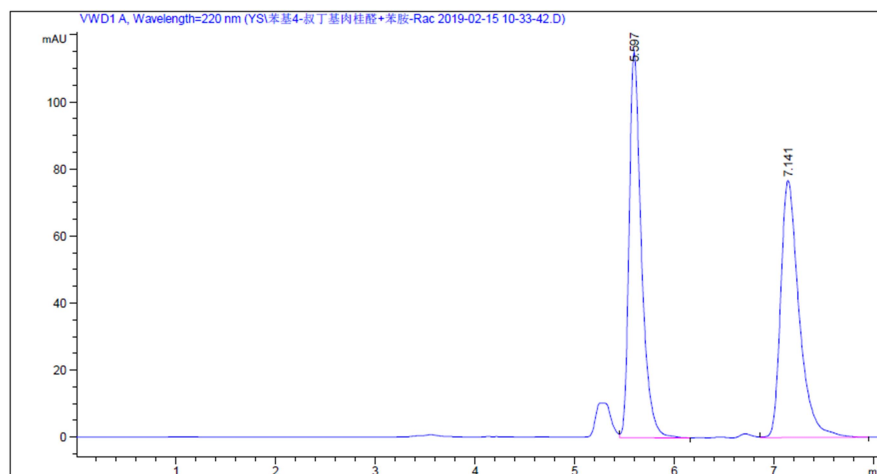

| 峰 # | 保留时间 [min] | 类型 | 峰宽 [min] | 峰面积 [mAU*s] | 峰高 [mAU]  | 峰面积 %   |
|-----|------------|----|----------|-------------|-----------|---------|
| 1   | 5.597      | VB | 0.1284   | 980.59686   | 115.10069 | 49.8791 |
| 2   | 7.141      | VB | 0.1940   | 985.35120   | 76.63815  | 50.1209 |

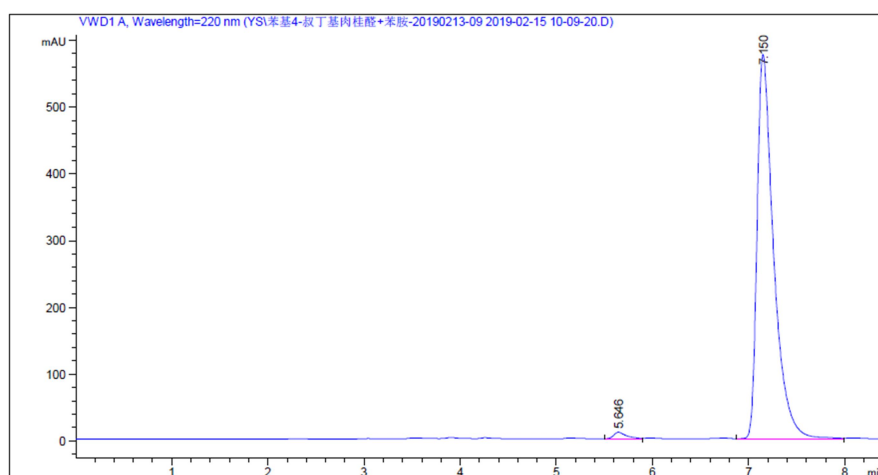

| 峰 # | 保留时间 [min] | 类型 | 峰宽 [min] | 峰面积 [mAU*s] | 峰高 [mAU]  | 峰面积 %   |
|-----|------------|----|----------|-------------|-----------|---------|
| 1   | 5.646      | VV | 0.1330   | 89.41028    | 9.75174   | 1.2832  |
| 2   | 7.150      | VV | 0.1774   | 6878.23047  | 575.55450 | 98.7168 |

**Supplementary Figure 23.** HPLC spectra for racemic and chiral **3t**.

***N*-(3-(4-chlorophenyl)-2-phenylpropyl)aniline (3u)**: 97% yield, 96% ee, colorless oil.<sup>1</sup>H NMR(500 MHz, CDCl<sub>3</sub>): δ 7.29 (t, *J* = 7.4 Hz, 2H), 7.25–7.19 (m, 1H), 7.19–7.07 (m, 6H), 6.96 (d, *J* = 8.1 Hz, 2H), 6.67 (t, *J* = 7.3 Hz, 1H), 6.46 (d, *J* = 8.0 Hz, 2H), 3.48 (s, 1H), 3.43 (dd, *J* = 12.4, 5.3 Hz, 1H), 3.26 (dd, *J* = 12.4, 8.8 Hz, 1H), 3.19–3.08 (m, 1H), 3.04–2.85 (m, 2H); <sup>13</sup>C NMR (125 MHz, CDCl<sub>3</sub>): δ 147.84, 141.99, 138.22, 131.85, 130.34, 129.19, 128.69, 128.32, 127.83, 126.93, 117.51, 113.00, 48.55, 46.98, 40.18. HRMS (ESI) *m/z* calcd for C<sub>21</sub>H<sub>21</sub>ClN<sup>+</sup> (M+H)<sup>+</sup> 322.13570, found 322.13599. Enantiomeric excess was determined by chiral HPLC: Chiralpak IB–3 column, Hex/IPA=98:2, 1 mL/min, 220 nm, 11.62 min (minor), 12.10 min (major).

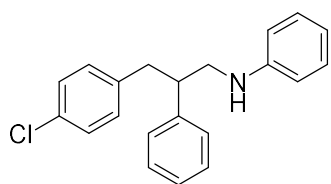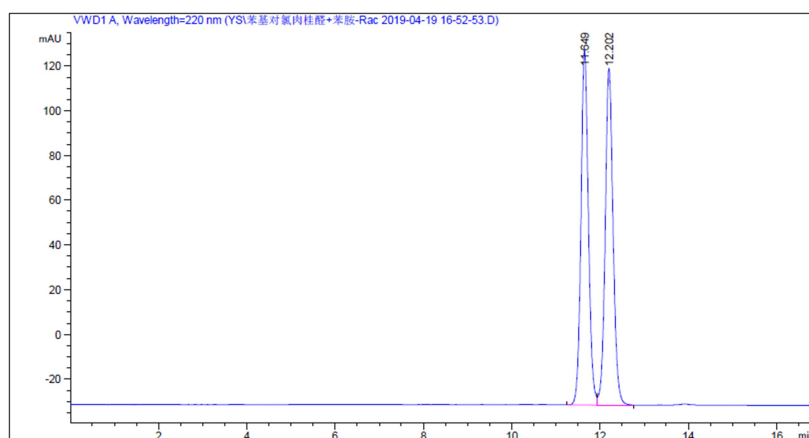

| 峰 # | 保留时间 [min] | 类型 | 峰宽 [min] | 峰面积 [mAU*s] | 峰高 [mAU]  | 峰面积 %   |
|-----|------------|----|----------|-------------|-----------|---------|
| 1   | 11.649     | BV | 0.1780   | 1849.40295  | 158.70419 | 49.7987 |
| 2   | 12.202     | VB | 0.1886   | 1864.35669  | 150.42131 | 50.2013 |

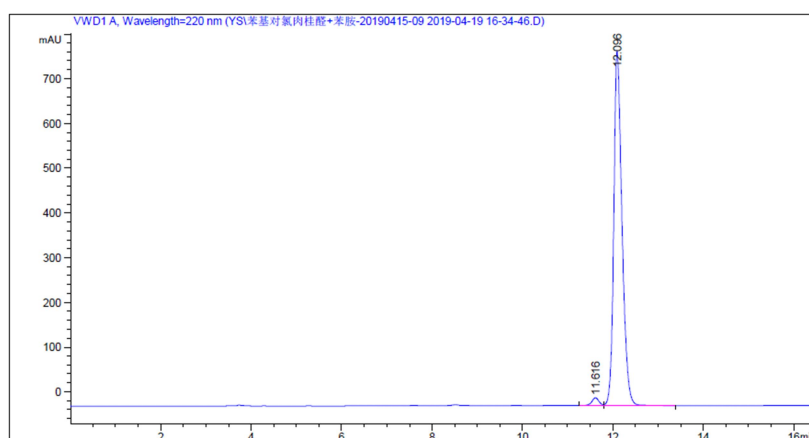

| 峰 # | 保留时间 [min] | 类型 | 峰宽 [min] | 峰面积 [mAU*s] | 峰高 [mAU]  | 峰面积 %   |
|-----|------------|----|----------|-------------|-----------|---------|
| 1   | 11.616     | VV | 0.1758   | 210.19321   | 18.05209  | 2.0496  |
| 2   | 12.096     | VV | 0.1898   | 1.00451e4   | 793.01660 | 97.9504 |

**Supplementary Figure 24.** HPLC spectra for racemic and chiral **3u**.

***N*-(2-phenyl-3-(*m*-tolyl)propyl)aniline (3v):** 98% yield, 97% ee, colorless oil. <sup>1</sup>H NMR(500 MHz, CDCl<sub>3</sub>): δ 7.29 (t, *J* = 7.5 Hz, 2H), 7.25–7.04 (m, 6H), 6.98 (d, *J* = 7.6 Hz, 1H), 6.91 (s, 1H), 6.88 (d, *J* = 7.6 Hz, 1H), 6.65 (t, *J* = 7.3 Hz, 1H), 6.41 (d, *J* = 7.9 Hz, 2H), 3.42 (dd, *J* = 12.1, 4.8 Hz, 2H), 3.28–3.11 (m, 2H), 3.00–2.86 (m, 2H), 2.28 (s, 3H); <sup>13</sup>C NMR (125 MHz, CDCl<sub>3</sub>): δ 147.92, 142.80, 139.72, 137.77, 129.81, 129.10, 128.60, 128.12, 127.80, 126.84, 126.73, 126.04, 117.29, 112.96, 48.42, 46.81, 40.94, 21.33. HRMS (ESI) *m/z* calcd for C<sub>22</sub>H<sub>24</sub>N<sup>+</sup> (*M*+*H*)<sup>+</sup> 302.19033, found 302.19040. Enantiomeric excess was determined by chiral HPLC: Chiralpak IB–3 column, Hex/IPA=95:5, 1 mL/min, 220 nm, 6.70 min (minor), 7.10 min (major).

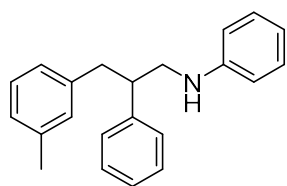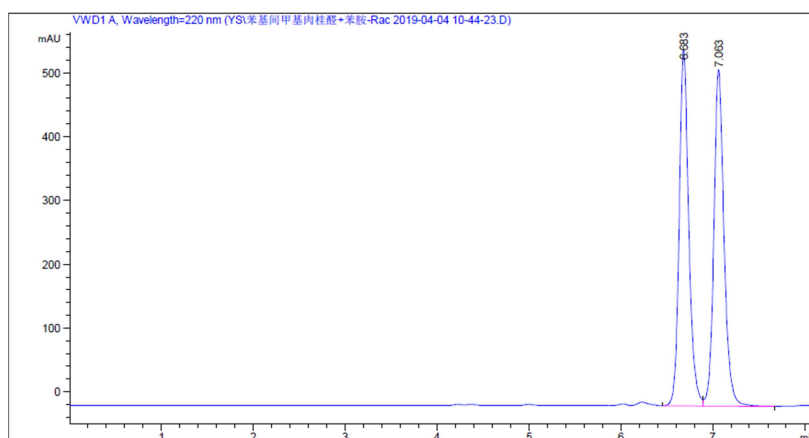

| 峰 # | 保留时间 [min] | 类型 | 峰宽 [min] | 峰面积 [mAU*s] | 峰高 [mAU]  | 峰面积 %   |
|-----|------------|----|----------|-------------|-----------|---------|
| 1   | 6.683      | BV | 0.1094   | 4032.63550  | 557.24103 | 49.9109 |
| 2   | 7.063      | VB | 0.1166   | 4047.03345  | 526.90094 | 50.0891 |

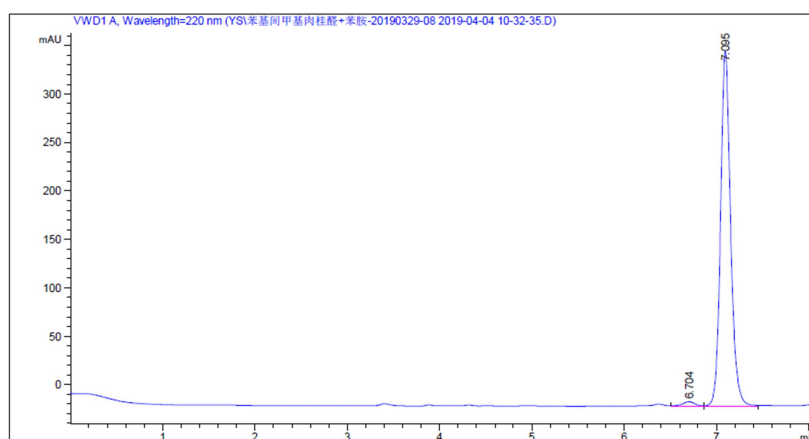

| 峰 # | 保留时间 [min] | 类型 | 峰宽 [min] | 峰面积 [mAU*s] | 峰高 [mAU]  | 峰面积 %   |
|-----|------------|----|----------|-------------|-----------|---------|
| 1   | 6.704      | VV | 0.1375   | 41.85034    | 4.62759   | 1.4905  |
| 2   | 7.095      | VV | 0.1141   | 2765.93213  | 366.09775 | 98.5095 |

**Supplementary Figure 25.** HPLC spectra for racemic and chiral 3v.

***N*-(2-phenyl-3-(3-(trifluoromethyl)phenyl)propyl)aniline (3w)**: 98% yield, 95% ee, colorless oil.

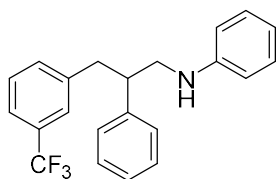

$^1\text{H}$  NMR(500 MHz,  $\text{CDCl}_3$ ):  $\delta$  7.41 (d,  $J = 7.7$  Hz, 1H), 7.35–7.25 (m, 4H), 7.25–7.16 (m, 2H), 7.16–7.07 (m, 4H), 6.68 (t,  $J = 7.3$  Hz, 1H), 6.46 (d,  $J = 7.9$  Hz, 2H), 3.44 (dd,  $J = 12.5, 5.3$  Hz, 2H), 3.29 (dd,  $J = 12.5, 8.8$  Hz, 1H), 3.23–3.13 (m, 1H), 3.12–2.94 (m, 2H);  $^{13}\text{C}$  NMR (125 MHz,  $\text{CDCl}_3$ ):  $\delta$  147.78, 141.70, 140.70, 132.41,

130.53 (q,  $J = 32.0$  Hz), 129.22, 128.74, 128.60, 127.82, 127.05, 125.72 (q,  $J = 3.8$  Hz), 125.22, 123.14, 117.62, 113.03, 48.53, 46.92, 40.61. HRMS (ESI)  $m/z$  calcd for  $\text{C}_{22}\text{H}_{21}\text{F}_3\text{N}^+$  (M+H) $^+$  356.16206, found 356.16229. Enantiomeric excess was determined by chiral HPLC: Chiralpak IB-3 column, Hex/IPA=95:5, 1 mL/min, 220 nm, 10.06 min (minor), 10.72 min (major).

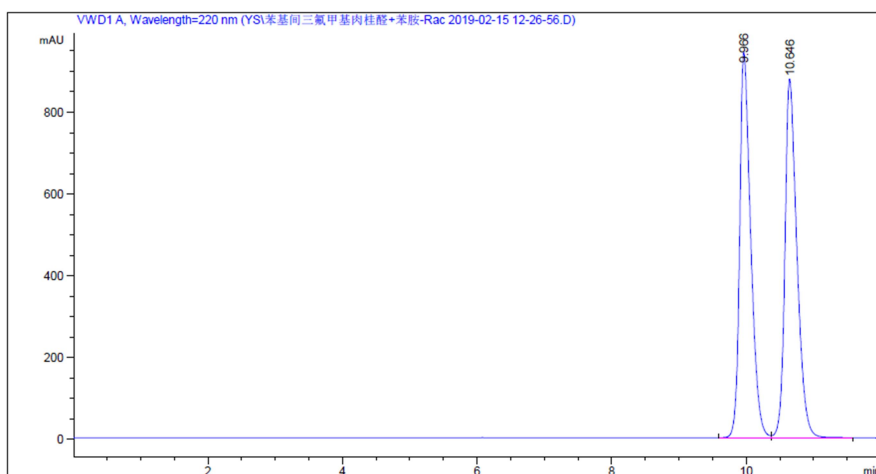

Z

| 峰 # | 保留时间 [min] | 类型 | 峰宽 [min] | 峰面积 [mAU*s] | 峰高 [mAU]  | 峰面积 %   |
|-----|------------|----|----------|-------------|-----------|---------|
| 1   | 9.966      | BV | 0.1700   | 1.07392e4   | 942.21100 | 49.7864 |
| 2   | 10.646     | VV | 0.1850   | 1.08313e4   | 877.53125 | 50.2136 |

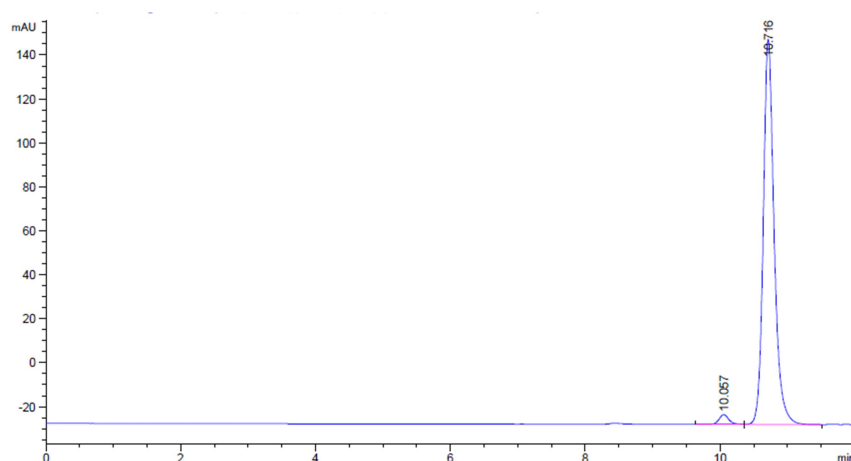

| 峰 # | 保留时间 [min] | 类型 | 峰宽 [min] | 峰面积 [mAU*s] | 峰高 [mAU]  | 峰面积 %   |
|-----|------------|----|----------|-------------|-----------|---------|
| 1   | 10.057     | BV | 0.1565   | 46.51004    | 4.50388   | 2.3198  |
| 2   | 10.716     | VB | 0.1685   | 1958.40039  | 175.08743 | 97.6802 |

**Supplementary Figure 26.** HPLC spectra for racemic and chiral **3w**.

***N*-[3-(3,5-dichlorophenyl)-2-phenylpropyl]aniline (3x)**: 93% yield, 91% ee, colorless oil.<sup>1</sup>H

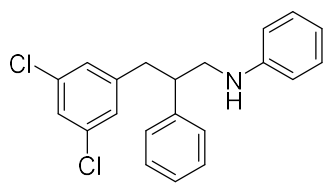

NMR(500 MHz, CDCl<sub>3</sub>): δ 7.31 (t, *J* = 7.4 Hz, 2H), 7.27–7.20 (m, 1H), 7.18–7.09 (m, 5H), 6.92 (d, *J* = 1.8 Hz, 2H), 6.69 (t, *J* = 7.3 Hz, 1H), 6.51–6.44 (m, 2H), 3.42 (dd, *J* = 12.5, 5.4 Hz, 2H), 3.26 (dd, *J* = 12.6, 8.7 Hz, 1H), 3.19–3.09 (m, 1H), 3.01–2.83 (m, 2H);  
<sup>13</sup>C NMR (125 MHz, CDCl<sub>3</sub>): δ 147.66, 143.14, 141.37, 134.58,

129.25, 128.80, 127.74, 127.47, 127.17, 126.39, 117.66, 113.03, 48.51, 46.60, 40.15. HRMS (ESI) *m/z* calcd for C<sub>21</sub>H<sub>20</sub>Cl<sub>2</sub>N<sup>+</sup> (M+H)<sup>+</sup> 356.09673, found 356.09702. Enantiomeric excess was determined by chiral HPLC: Chiralpak IA–3 column, Hex/IPA=98:2, 1 mL/min, 220 nm, 7.45 min (minor), 7.86 min (major).

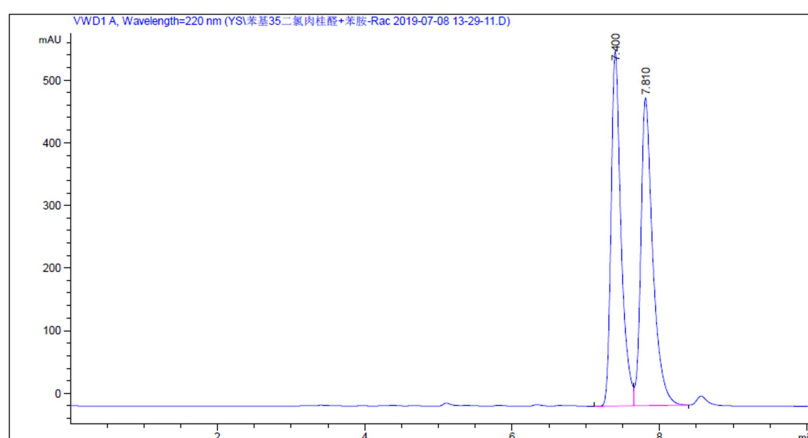

| 峰 # | 保留时间 [min] | 类型 | 峰宽 [min] | 峰面积 [mAU*s] | 峰高 [mAU]  | 峰面积 %   |
|-----|------------|----|----------|-------------|-----------|---------|
| 1   | 7.400      | BV | 0.1421   | 5339.85889  | 565.96735 | 49.0489 |
| 2   | 7.810      | VB | 0.1678   | 5546.94775  | 491.05417 | 50.9511 |

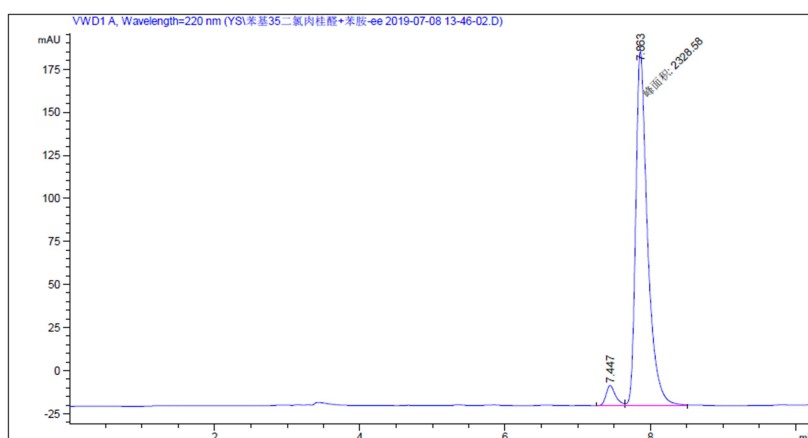

| 峰 # | 保留时间 [min] | 类型 | 峰宽 [min] | 峰面积 [mAU*s] | 峰高 [mAU]  | 峰面积 %   |
|-----|------------|----|----------|-------------|-----------|---------|
| 1   | 7.447      | BV | 0.1381   | 108.87811   | 11.75020  | 4.4669  |
| 2   | 7.863      | MF | 0.1886   | 2328.58008  | 205.77347 | 95.5331 |

**Supplementary Figure 27.** HPLC spectra for racemic and chiral **3x**.

**3-(2-chlorophenyl)-N-(4-methoxybenzyl)-2-phenylpropan-1-amine (3y):** 63% yield, 94% ee, colorless oil. <sup>1</sup>H NMR(500 MHz, CDCl<sub>3</sub>): δ 7.37–7.27 (m, 3H), 7.22 (d, *J* = 7.3 Hz, 1H), 7.20–7.16 (m, 2H), 7.14–7.09 (m, 1H), 7.08–7.04 (m, 1H), 6.96 (d, *J* = 7.6 Hz, 1H), 3.72 (s, 3H), 3.47–3.38 (m, 1H), 3.34–3.26 (m, 2H), 3.24–3.17 (m, 1H), 3.03–2.94 (m, 1H); <sup>13</sup>C NMR (125 MHz, CDCl<sub>3</sub>): δ 152.15, 142.37, 142.19, 137.57, 134.21, 131.36, 129.57, 128.71, 127.91, 127.68, 126.93, 126.53, 114.85, 114.35, 55.82, 49.37, 45.25, 38.77. HRMS (ESI) *m/z* calcd for C<sub>22</sub>H<sub>23</sub>ClNO<sup>+</sup> (M+H)<sup>+</sup> 352.14627, found 352.14472. Enantiomeric excess was determined by chiral HPLC: Chiralpak IB–3 column, Hex/IPA=98:2, 1 mL/min, 220 nm, 11.41 min (minor), 12.03 min (major).

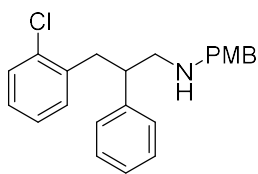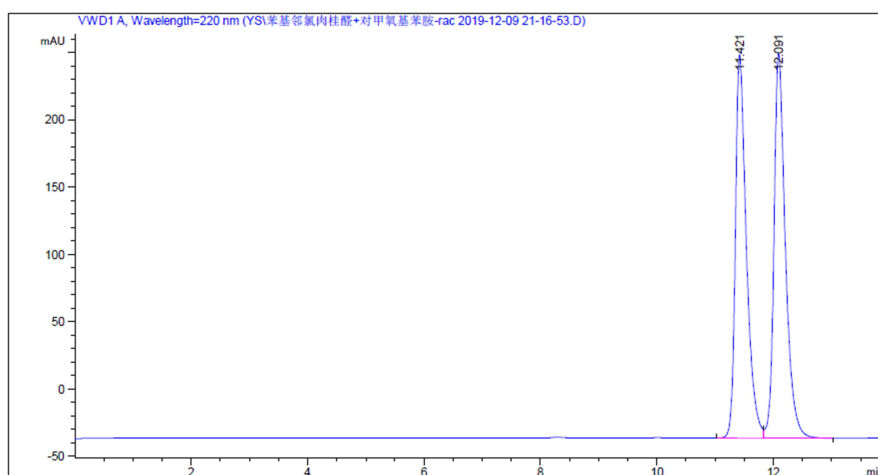

| 峰 # | 保留时间 [min] | 类型 | 峰宽 [min] | 峰面积 [mAU*s] | 峰高 [mAU]  | 峰面积 %   |
|-----|------------|----|----------|-------------|-----------|---------|
| 1   | 11.421     | BV | 0.1974   | 3745.24170  | 284.87762 | 48.9943 |
| 2   | 12.091     | VB | 0.2030   | 3898.99023  | 286.09387 | 51.0057 |

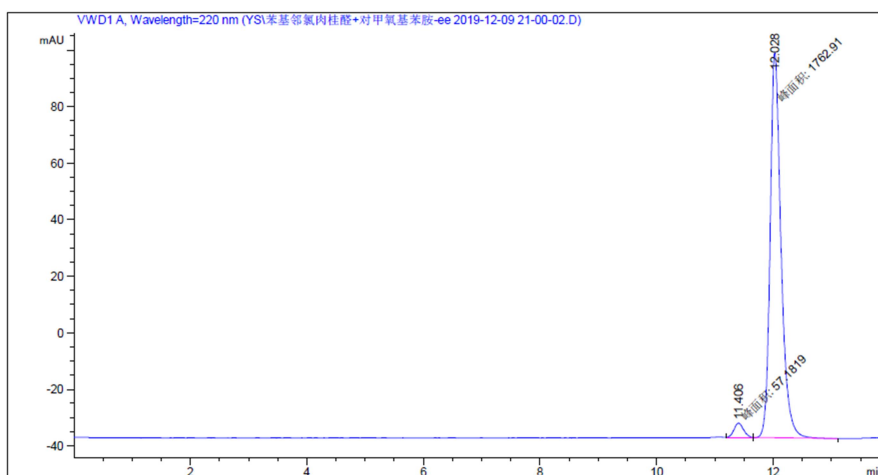

| 峰 # | 保留时间 [min] | 类型 | 峰宽 [min] | 峰面积 [mAU*s] | 峰高 [mAU]  | 峰面积 %   |
|-----|------------|----|----------|-------------|-----------|---------|
| 1   | 11.406     | MF | 0.1890   | 57.18188    | 5.04131   | 3.1417  |
| 2   | 12.028     | FM | 0.2155   | 1762.90735  | 136.31967 | 96.8583 |

**Supplementary Figure 28.** HPLC spectra for racemic and chiral **3y**.

**3-(2-fluorophenyl)-N-(4-methoxybenzyl)-2-phenylpropan-1-amine (3z):** 91% yield, 95%

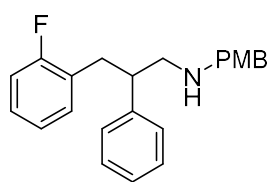

ee, colorless oil. <sup>1</sup>H NMR (500 MHz, CDCl<sub>3</sub>): δ 7.29 (t, *J* = 7.4 Hz, 2H), 7.26–7.08 (m, 4H), 7.05–6.91 (m, 3H), 6.72 (d, *J* = 8.9 Hz, 2H), 6.43 (d, *J* = 8.9 Hz, 2H), 3.42 (dd, *J* = 11.4, 4.1 Hz, 1H), 3.34–3.16 (m, 2H), 3.01 (ddd, *J* = 78.1, 13.6, 6.7 Hz, 2H); <sup>13</sup>C NMR (125 MHz, CDCl<sub>3</sub>): δ 162.21, 160.27, 152.18, 142.40, 142.20, 131.36 (d, *J* = 4.7 Hz), 128.68, 127.94 (d, *J* = 8.0 Hz), 127.85, 126.92, 123.84 (d, *J* = 3.5 Hz), 115.34, 115.16, 114.87, 114.39, 99.99, 55.82, 49.49, 45.86, 34.11. HRMS (ESI) *m/z* calcd for C<sub>22</sub>H<sub>23</sub>FNO<sup>+</sup> (M+H)<sup>+</sup> 336.17582, found 336.17575. Enantiomeric excess was determined by chiral HPLC: Chiralpak IB–3 column, Hex/IPA=98:2, 1 mL/min, 220 nm, 10.74 min (major), 11.46 min (minor).

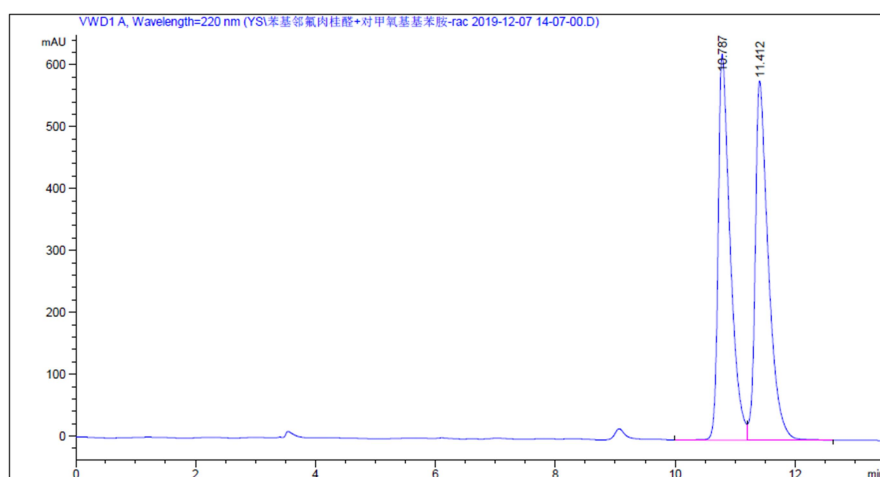

| 峰 # | 保留时间 [min] | 类型 | 峰宽 [min] | 峰面积 [mAU*s] | 峰高 [mAU]  | 峰面积 %   |
|-----|------------|----|----------|-------------|-----------|---------|
| 1   | 10.787     | BV | 0.2046   | 8689.03516  | 623.41895 | 49.5598 |
| 2   | 11.412     | VB | 0.2238   | 8843.37695  | 580.33606 | 50.4402 |

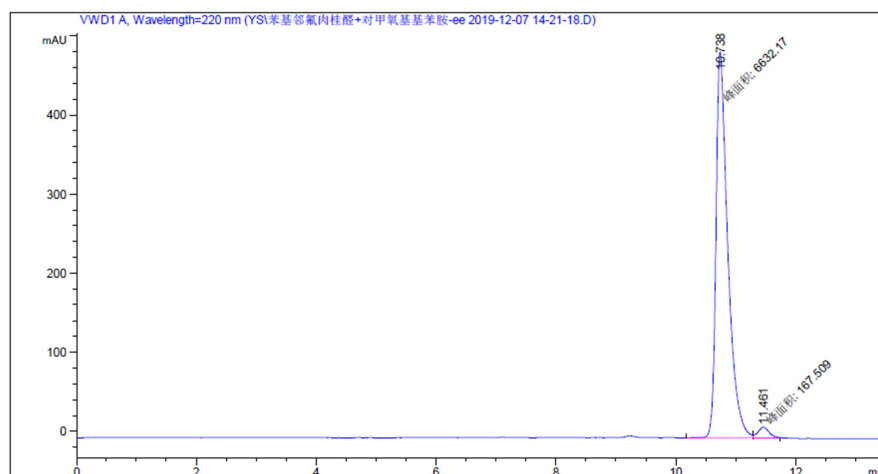

| 峰 # | 保留时间 [min] | 类型 | 峰宽 [min] | 峰面积 [mAU*s] | 峰高 [mAU]  | 峰面积 %   |
|-----|------------|----|----------|-------------|-----------|---------|
| 1   | 10.738     | MF | 0.2270   | 6632.17139  | 486.95319 | 97.5365 |
| 2   | 11.461     | FM | 0.2098   | 167.50859   | 13.30424  | 2.4635  |

**Supplementary Figure 29.** HPLC spectra for racemic and chiral **3z**.

***N*-(3-(furan-2-yl)-2-phenylpropyl)aniline (3za)**: 93% yield, 95% ee, colorless oil.<sup>1</sup>H

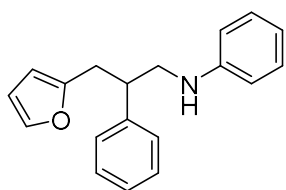

NMR(500 MHz, CDCl<sub>3</sub>): δ 7.35–7.27 (m, 3H), 7.26–7.21 (m, 1H), 7.18 (d, *J* = 7.5 Hz, 2H), 7.12 (t, *J* = 7.7 Hz, 2H), 6.67 (t, *J* = 7.3 Hz, 1H), 6.49 (d, *J* = 7.9 Hz, 2H), 6.24 (t, *J* = 2.4 Hz, 1H), 5.90 (d, *J* = 3.1 Hz, 1H), 3.51 (s, 1H), 3.47 (dd, *J* = 11.7, 4.5 Hz, 1H), 3.35–3.20 (m, 2H), 3.08–2.92 (m, 2H); <sup>13</sup>C NMR (125 MHz, CDCl<sub>3</sub>): δ 153.66,

147.90, 142.33, 141.10, 129.18, 128.67, 127.64, 126.91, 117.40, 112.98, 110.21, 106.49, 48.64, 44.18, 32.95. HRMS (ESI) *m/z* calcd for C<sub>19</sub>H<sub>20</sub>NO<sup>+</sup> (M+H)<sup>+</sup> 278.15394, found 278.15408. Enantiomeric excess was determined by chiral HPLC: Chiralpak IA-3 column, Hex/IPA=90:10, 1 mL/min, 220 nm, 6.07 min (minor), 7.38 min (major).

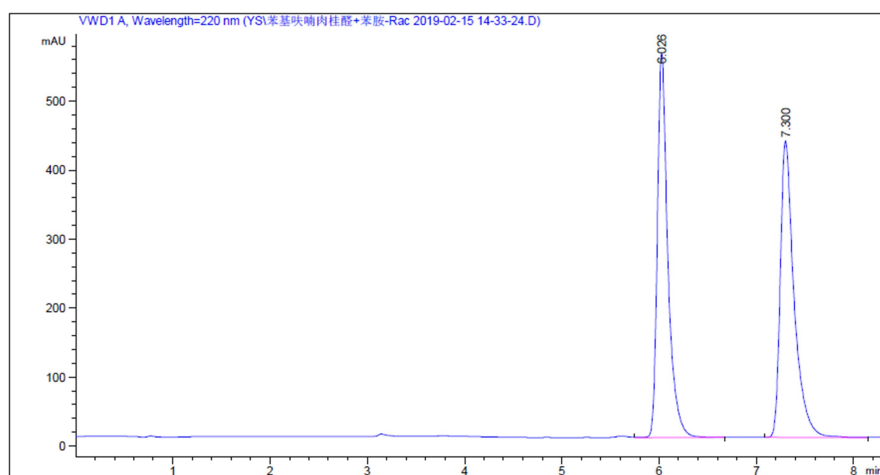

| 峰 # | 保留时间 [min] | 类型 | 峰宽 [min] | 峰面积 [mAU*s] | 峰高 [mAU]  | 峰面积 %   |
|-----|------------|----|----------|-------------|-----------|---------|
| 1   | 6.026      | VV | 0.1116   | 4179.08398  | 556.56714 | 49.7188 |
| 2   | 7.300      | BV | 0.1447   | 4226.35156  | 430.06265 | 50.2812 |

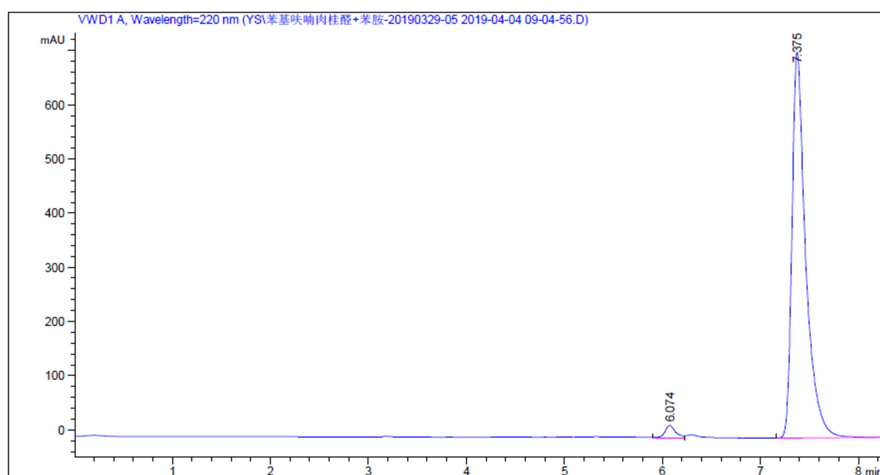

| 峰 # | 保留时间 [min] | 类型  | 峰宽 [min] | 峰面积 [mAU*s] | 峰高 [mAU]  | 峰面积 %   |
|-----|------------|-----|----------|-------------|-----------|---------|
| 1   | 6.074      | VV  | 0.1081   | 167.73373   | 22.71933  | 2.3639  |
| 2   | 7.375      | BBA | 0.1437   | 6927.76758  | 710.86682 | 97.6361 |

**Supplementary Figure 30.** HPLC spectra for racemic and chiral **3za**.



***N*-(2-methylpentyl)aniline (3zb)**: 56% yield, 17% ee, colorless oil.  $^1\text{H}$  NMR(500 MHz,  $\text{CDCl}_3$ ):

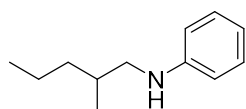

$\delta$  7.18 (d,  $J = 7.5$  Hz, 2H), 6.68 (t,  $J = 7.2$  Hz, 1H), 6.60 (d,  $J = 7.9$  Hz, 2H), 3.67 (s, 1H), 3.06 (dd,  $J = 12.2, 5.9$  Hz, 1H), 2.89 (dd,  $J = 12.2, 7.2$  Hz, 1H), 1.80–1.71 (m, 1H), 1.50–1.38 (m, 2H), 1.37–1.29 (m, 1H), 1.23–1.12 (m, 1H), 0.97 (d,  $J = 6.7$  Hz, 3H), 0.92 (t,  $J = 6.9$  Hz, 3H);  $^{13}\text{C}$  NMR (125 MHz,  $\text{CDCl}_3$ ):  $\delta$  148.65, 129.21, 116.92, 112.63, 50.35, 37.09, 32.72, 20.10, 18.04, 14.35. HRMS (ESI)  $m/z$  calcd for  $\text{C}_{12}\text{H}_{20}\text{N}^+$  ( $\text{M}+\text{H}$ ) $^+$  178.15903, found 178.15909. Enantiomeric excess was determined by chiral HPLC: Chiralpak OJ–3 column, Hex/IPA=99:1, 1 mL/min, 220 nm, 9.33 min (major), 9.72 min (minor).

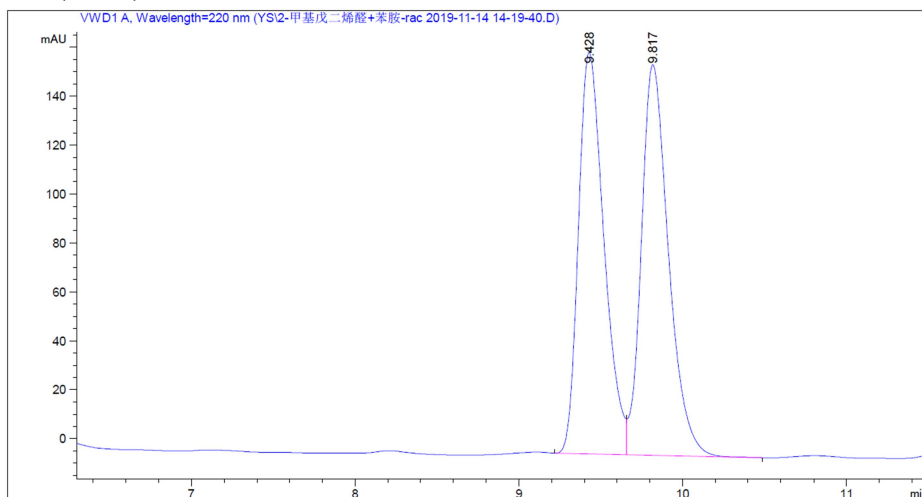

| 峰 # | 保留时间 [min] | 类型 | 峰宽 [min] | 峰面积 [mAU*s] | 峰高 [mAU]  | 峰面积 %   |
|-----|------------|----|----------|-------------|-----------|---------|
| 1   | 9.428      | BV | 0.1665   | 1780.13843  | 164.15874 | 49.1294 |
| 2   | 9.817      | VB | 0.1766   | 1843.22949  | 159.70799 | 50.8706 |

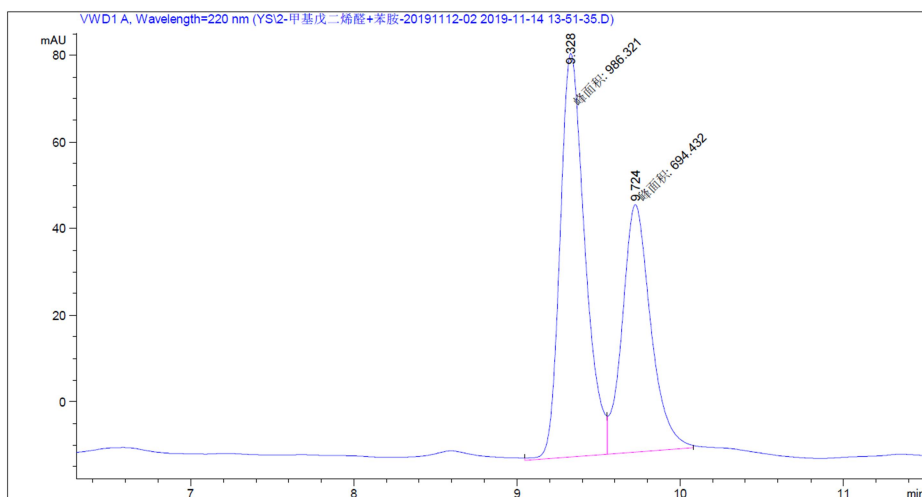

| 峰 # | 保留时间 [min] | 类型 | 峰宽 [min] | 峰面积 [mAU*s] | 峰高 [mAU] | 峰面积 %   |
|-----|------------|----|----------|-------------|----------|---------|
| 1   | 9.328      | MF | 0.1764   | 986.32117   | 93.21584 | 58.6833 |
| 2   | 9.724      | FM | 0.2023   | 694.43164   | 57.19940 | 41.3167 |

**Supplementary Figure 31.** HPLC spectra for racemic and chiral **3zb**.

***N*-(3-phenylbutyl)aniline (3zc)**<sup>[11]</sup>: 34% yield, <5% ee, colorless oil.<sup>1</sup>H NMR(500 MHz, CDCl<sub>3</sub>): δ 7.31 (dd, *J* = 8.2, 7.0 Hz, 2H), 7.23–7.18 (m, 3H), 7.13 (dd, *J* = 8.5, 7.2 Hz, 2H), 6.71–6.63 (m, 1H), 6.50 (d, *J* = 7.5 Hz, 2H), 3.49 (s, 1H), 3.09–2.93 (m, 2H), 2.85 (h, *J* = 7.1 Hz, 1H), 1.98–1.80 (m, 2H), 1.30 (d, *J* = 6.9 Hz, 3H). Enantiomeric excess was determined by chiral HPLC: Chiralpak IB–3 column, Hex/IPA=99:1, 1 mL/min, 220 nm, 15.20 min (minor), 15.90 min (major).

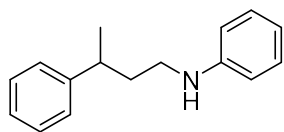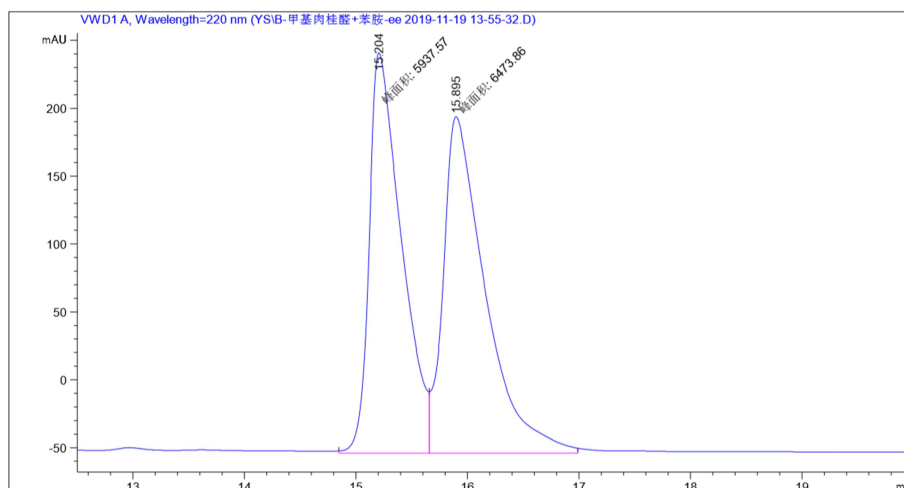

| 峰 # | 保留时间 [min] | 类型 | 峰宽 [min] | 峰面积 [mAU*s] | 峰高 [mAU]  | 峰面积 %   |
|-----|------------|----|----------|-------------|-----------|---------|
| 1   | 15.204     | MF | 0.3355   | 5937.57373  | 294.95187 | 47.8395 |
| 2   | 15.895     | FM | 0.4353   | 6473.85938  | 247.85402 | 52.1605 |

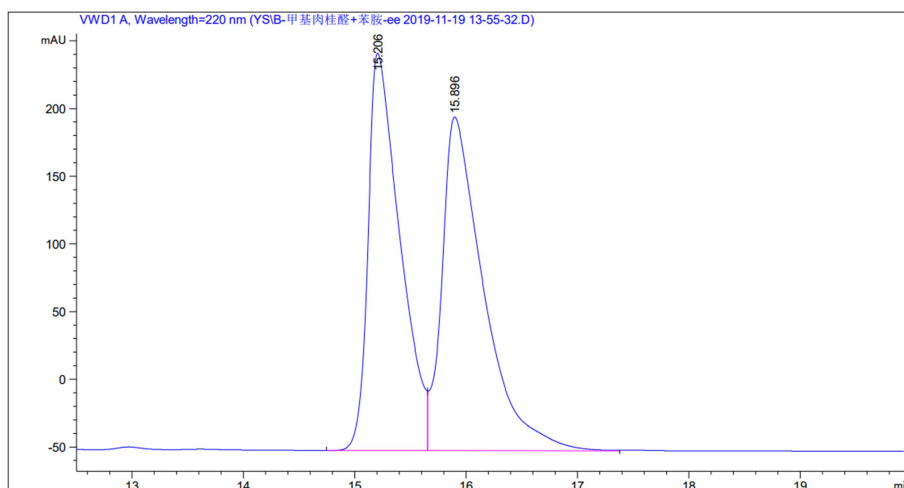

| 峰 # | 保留时间 [min] | 类型 | 峰宽 [min] | 峰面积 [mAU*s] | 峰高 [mAU]  | 峰面积 %   |
|-----|------------|----|----------|-------------|-----------|---------|
| 1   | 15.206     | BV | 0.2906   | 5851.93359  | 293.47162 | 47.7690 |
| 2   | 15.896     | VV | 0.3750   | 6398.56299  | 246.37225 | 52.2310 |

**Supplementary Figure 32.** HPLC spectra for racemic and chiral **3zc**.

***N*-phenethyl-2,3-diphenylpropan-1-amine (3zd)**: 70% yield, 26% ee, colorless oil. <sup>1</sup>H NMR(500

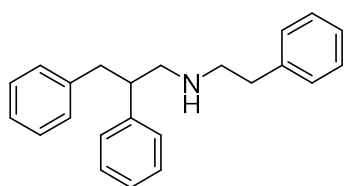

MHz, CDCl<sub>3</sub>): δ 7.25–7.10 (m, 11H), 7.06 (d, *J* = 7.5 Hz, 2H), 7.03 (d, *J* = 7.3 Hz, 2H), 3.13–3.03 (m, 1H), 2.98–2.57 (m, 9H). <sup>13</sup>C NMR (125 MHz, CDCl<sub>3</sub>): δ 143.16, 140.20, 140.03, 129.09, 128.62, 128.54, 128.39, 128.17, 127.80, 126.55, 126.04, 125.93, 54.45, 51.16, 47.84, 41.30, 36.27. HRMS (ESI) *m/z* calcd for

C<sub>23</sub>H<sub>26</sub>N<sup>+</sup> (*M*+*H*)<sup>+</sup> 316.20598, found 316.20624. Enantiomeric excess was determined by chiral HPLC: Chiralpak OD-H column, Hex/IPA=90:10, DEA 0.1%, TFA 0.2%, 1 mL/min, 220 nm, 8.93 min (minor), 10.17 min (major).

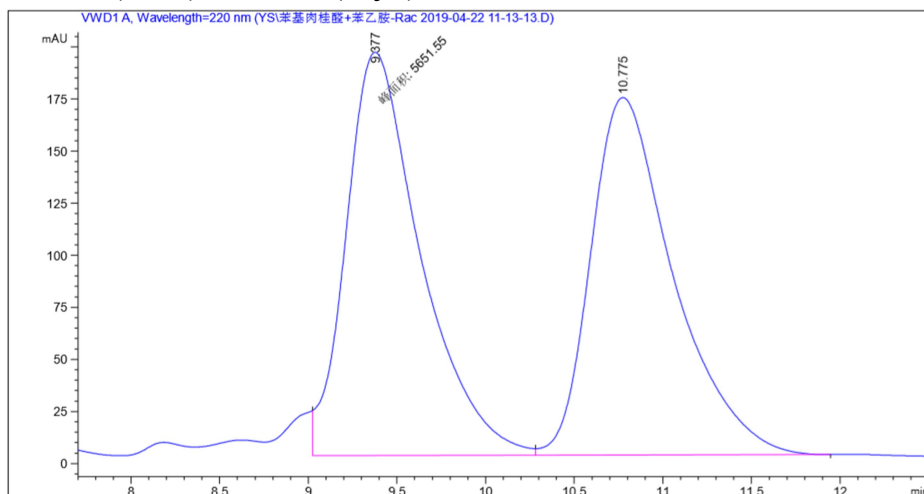

| 峰 # | 保留时间 [min] | 类型 | 峰宽 [min] | 峰面积 [mAU*s] | 峰高 [mAU]  | 峰面积 %   |
|-----|------------|----|----------|-------------|-----------|---------|
| 1   | 9.377      | FM | 0.4870   | 5651.54883  | 193.42178 | 50.4421 |
| 2   | 10.775     | VB | 0.4837   | 5552.47314  | 171.51688 | 49.5579 |

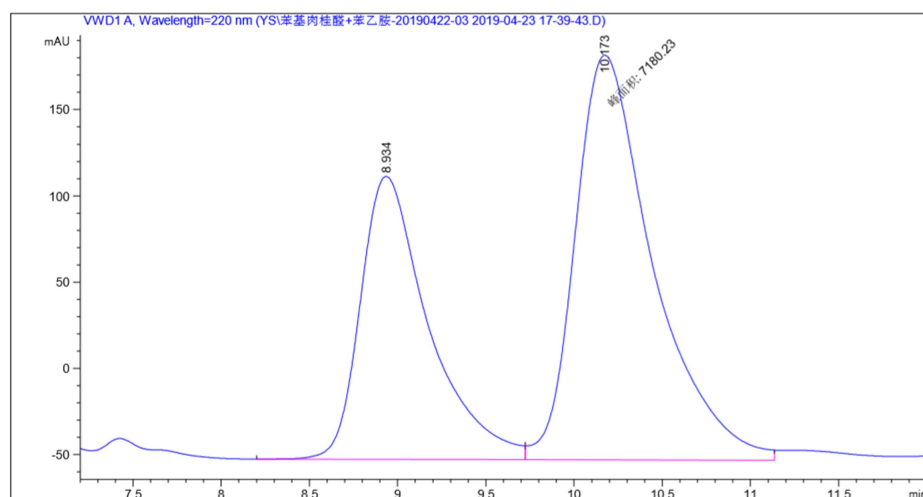

| 峰 # | 保留时间 [min] | 类型 | 峰宽 [min] | 峰面积 [mAU*s] | 峰高 [mAU]  | 峰面积 %   |
|-----|------------|----|----------|-------------|-----------|---------|
| 1   | 8.934      | BV | 0.3950   | 4399.76611  | 164.01610 | 37.9945 |
| 2   | 10.173     | MF | 0.5103   | 7180.23486  | 234.50676 | 62.0055 |

**Supplementary Figure 33.** HPLC spectra for racemic and chiral **3zd**.

***N*-(2,3-diphenylpropyl)-4-methoxyaniline (3ab)**: 93% yield, 98% ee, colorless oil.<sup>1</sup>H

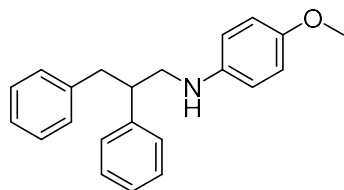

NMR(500 MHz, CDCl<sub>3</sub>): δ 7.29 (t, *J* = 7.4 Hz, 2H), 7.24–7.19 (m, 3H), 7.18–7.13 (m, 3H), 7.10–7.03 (m, 2H), 6.70 (d, *J* = 8.5 Hz, 2H), 6.39 (d, *J* = 8.6 Hz, 2H), 3.70 (s, 3H), 3.39 (dd, *J* = 11.5, 4.1 Hz, 1H), 3.29–3.08 (m, 3H), 2.97 (dd, *J* = 7.1, 3.3 Hz, 2H);

<sup>13</sup>C NMR (125 MHz, CDCl<sub>3</sub>): δ 152.06, 142.67, 142.12, 139.85, 129.01, 128.59, 128.21, 127.82, 126.73, 126.05, 114.77, 114.34, 55.71, 49.51, 46.93, 41.01. HRMS (ESI) *m/z* calcd for C<sub>22</sub>H<sub>24</sub>NO<sup>+</sup> (M+H)<sup>+</sup> 318.18524, found 318.18527. Enantiomeric excess was determined by chiral HPLC: Chiralpak IB–3 column, Hex/IPA=95:5, 1 mL/min, 220 nm, 9.18 min (major), 9.85 min (minor).

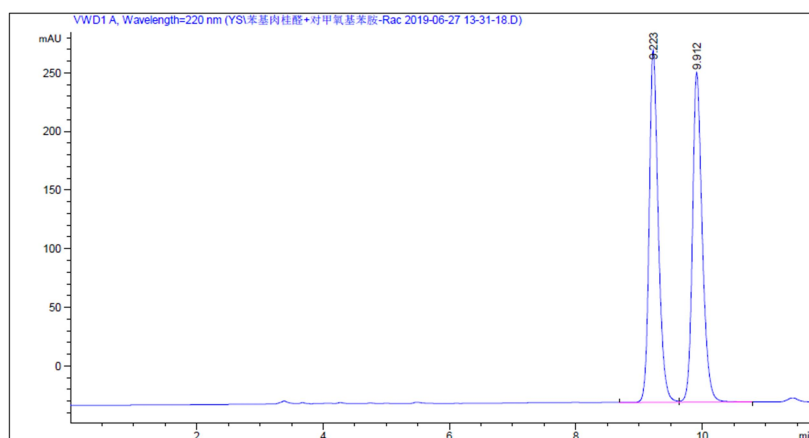

| 峰 # | 保留时间 [min] | 类型 | 峰宽 [min] | 峰面积 [mAU*s] | 峰高 [mAU]  | 峰面积 %   |
|-----|------------|----|----------|-------------|-----------|---------|
| 1   | 9.223      | VV | 0.1509   | 3011.13843  | 300.49478 | 49.8923 |
| 2   | 9.912      | VB | 0.1615   | 3024.13696  | 281.03146 | 50.1077 |

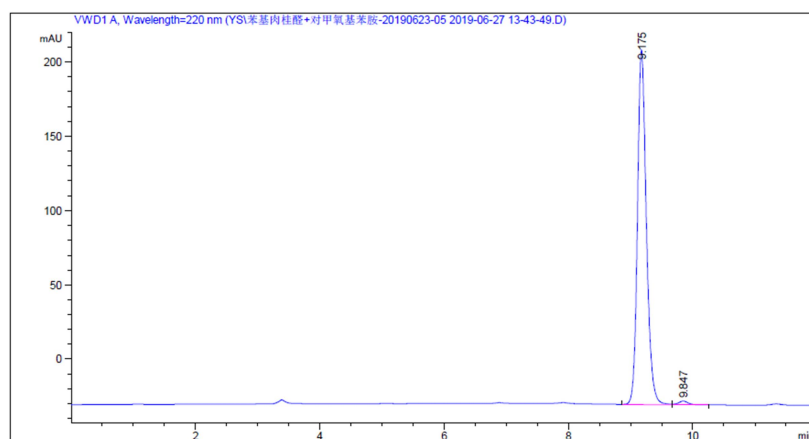

| 峰 # | 保留时间 [min] | 类型 | 峰宽 [min] | 峰面积 [mAU*s] | 峰高 [mAU]  | 峰面积 %   |
|-----|------------|----|----------|-------------|-----------|---------|
| 1   | 9.175      | BV | 0.1518   | 2367.91138  | 238.60042 | 98.8734 |
| 2   | 9.847      | VV | 0.1628   | 26.98104    | 2.48252   | 1.1266  |

**Supplementary Figure 34.** HPLC spectra for racemic and chiral **3ab**.

***N*-(2,3-diphenylpropyl)-4-methylaniline (3ac)**: 96% yield, 97% ee, colorless oil. <sup>1</sup>H NMR(500 MHz, CDCl<sub>3</sub>): δ 7.38–7.13 (m, 8H), 7.07 (d, *J* = 7.7 Hz, 2H), 6.91 (d, *J* = 8.3 Hz, 2H), 6.35 (d, *J* = 8.3 Hz, 2H), 3.42 (dd, *J* = 11.7, 4.5 Hz, 1H), 3.34 (s, 1H), 3.29–3.12 (m, 2H), 3.09–2.90 (m, 2H), 2.20 (s, 3H); <sup>13</sup>C NMR (125 MHz, CDCl<sub>3</sub>): δ 145.66, 142.69, 139.86, 129.62, 129.03, 128.59, 128.22, 127.84, 126.72, 126.54, 126.06, 113.18, 48.89, 46.92, 41.00, 20.33. HRMS (ESI) *m/z* calcd for C<sub>22</sub>H<sub>24</sub>N<sup>+</sup> (M+H)<sup>+</sup> 302.19033, found 302.19031. Enantiomeric excess was determined by chiral HPLC: Chiralpak IB–3 column, Hex/IPA=95:5, 1 mL/min, 220 nm, 5.83 min (minor), 6.119 min (major).

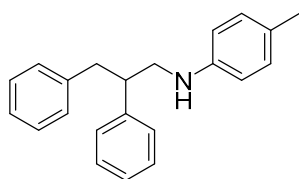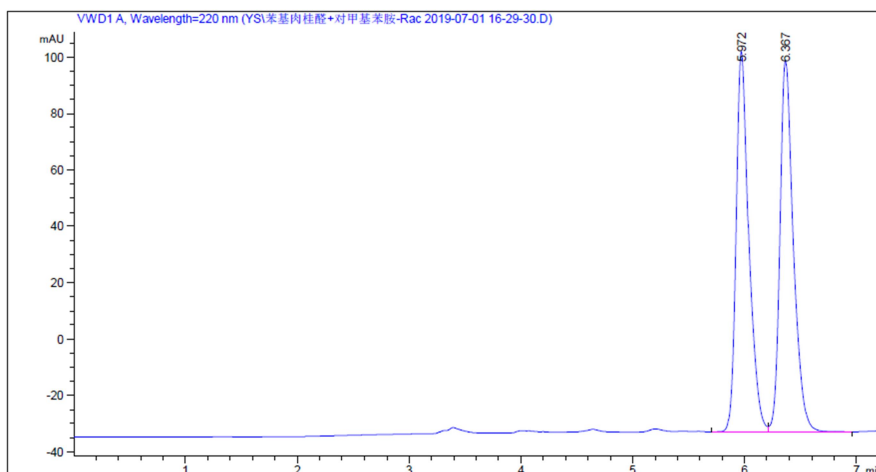

| 峰 # | 保留时间 [min] | 类型 | 峰宽 [min] | 峰面积 [mAU*s] | 峰高 [mAU]  | 峰面积 %   |
|-----|------------|----|----------|-------------|-----------|---------|
| 1   | 5.972      | BV | 0.1167   | 1072.30322  | 134.90921 | 49.4613 |
| 2   | 6.367      | VB | 0.1230   | 1095.65918  | 131.75912 | 50.5387 |

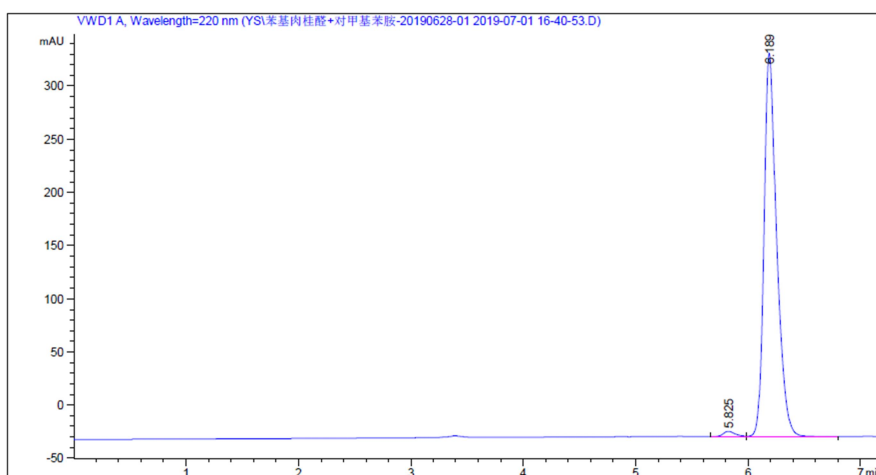

| 峰 # | 保留时间 [min] | 类型 | 峰宽 [min] | 峰面积 [mAU*s] | 峰高 [mAU]  | 峰面积 %   |
|-----|------------|----|----------|-------------|-----------|---------|
| 1   | 5.825      | BV | 0.1093   | 36.34295    | 4.97291   | 1.2624  |
| 2   | 6.189      | VB | 0.1180   | 2842.46240  | 360.44916 | 98.7376 |

**Supplementary Figure 35.** HPLC spectra for racemic and chiral **3ac**.

***N*-(2,3-diphenylpropyl)-4-fluoroaniline (3ad)**: 98% yield, 98% ee, colorless oil.  $^1\text{H}$  NMR (500 MHz,  $\text{CDCl}_3$ ):  $\delta$  7.30 (t,  $J = 7.4$  Hz, 2H), 7.23 (dd,  $J = 7.4, 4.9$  Hz, 3H), 7.19–7.13 (m, 3H), 7.10–7.05 (m, 2H), 6.80 (t,  $J = 8.7$  Hz, 2H), 6.37–6.28 (m, 2H), 3.39 (dd,  $J = 11.8, 4.5$  Hz, 1H), 3.33 (s, 1H), 3.25–3.09 (m, 2H), 2.97 (d,  $J = 7.1$  Hz, 2H);  $^{13}\text{C}$  NMR (125 MHz,  $\text{CDCl}_3$ ):  $\delta$  156.68, 154.82, 144.24, 142.53, 139.76, 129.01, 128.67, 128.29, 127.79, 126.85, 126.15, 115.61, 115.43, 113.82, 113.77, 49.14, 46.89, 41.01. HRMS (ESI)  $m/z$  calcd for  $\text{C}_{21}\text{H}_{21}\text{FN}^+$  ( $\text{M}+\text{H}$ ) $^+$  306.16525, found 306.16510. Enantiomeric excess was determined by chiral HPLC: Chiralpak IA–3 column, Hex/IPA=90:10, 1 mL/min, 220 nm, 5.81 min (minor), 7.65 min (major).

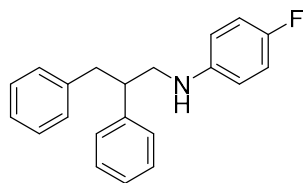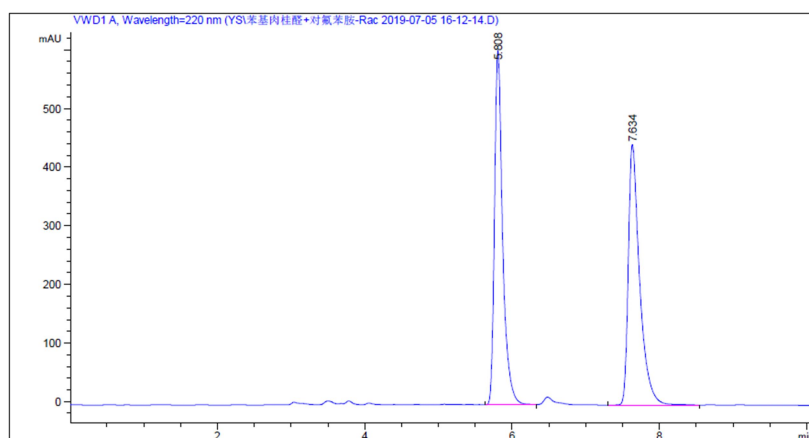

| 峰 # | 保留时间 [min] | 类型 | 峰宽 [min] | 峰面积 [mAU*s] | 峰高 [mAU]  | 峰面积 %   |
|-----|------------|----|----------|-------------|-----------|---------|
| 1   | 5.808      | BV | 0.1159   | 4653.00244  | 603.90485 | 49.4571 |
| 2   | 7.634      | BV | 0.1570   | 4755.16504  | 443.92905 | 50.5429 |

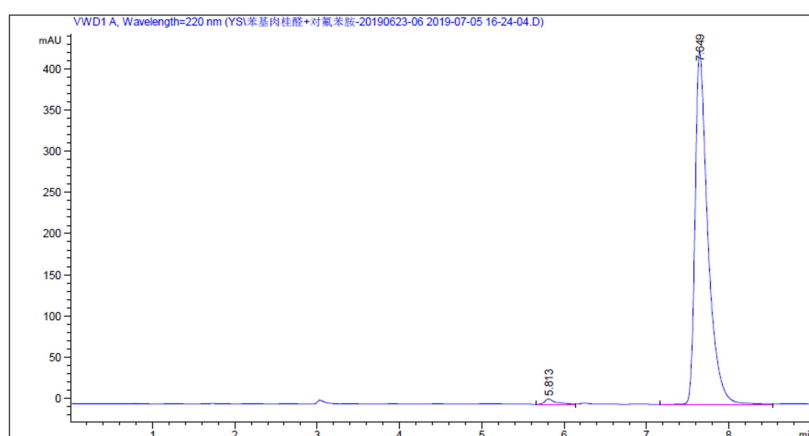

| 峰 # | 保留时间 [min] | 类型 | 峰宽 [min] | 峰面积 [mAU*s] | 峰高 [mAU]  | 峰面积 %   |
|-----|------------|----|----------|-------------|-----------|---------|
| 1   | 5.813      | BV | 0.1336   | 58.61099    | 6.23826   | 1.2488  |
| 2   | 7.649      | BV | 0.1583   | 4634.95020  | 428.10815 | 98.7512 |

**Supplementary Figure 36.** HPLC spectra for racemic and chiral **3ad**.

***N*-(2,3-diphenylpropyl)-3-methylaniline (3ae)**: 98% yield, 98% ee, colorless oil.  $^1\text{H}$  NMR (500 MHz,  $\text{CDCl}_3$ ):  $\delta$  7.34–7.25 (m, 2H), 7.26–7.19 (m, 3H), 7.19–7.12 (m, 3H), 7.08 (d,  $J = 7.4$  Hz, 2H), 6.99 (t,  $J = 7.7$  Hz, 1H), 6.48 (d,  $J = 7.5$  Hz, 1H), 6.27–6.17 (m, 2H), 3.43 (dd,  $J = 12.1, 4.8$  Hz, 2H), 3.28–3.10 (m, 2H), 3.03–2.91 (m, 2H), 2.20 (s, 3H);  $^{13}\text{C}$  NMR (125 MHz,  $\text{CDCl}_3$ ):  $\delta$  147.93, 142.71, 139.86, 138.85, 129.05, 128.98, 128.60, 128.24, 127.82, 126.74, 126.08, 118.28, 113.68, 110.16, 48.46, 46.95, 40.94, 21.53. HRMS (ESI)  $m/z$  calcd for  $\text{C}_{22}\text{H}_{24}\text{N}^+$  ( $\text{M}+\text{H}$ ) $^+$  302.19033, found 302.19034. Enantiomeric excess was determined by chiral HPLC: Chiralpak IA–3 column, Hex/IPA=90:10, 1 mL/min, 220 nm, 4.92 min (minor), 5.67 min (major).

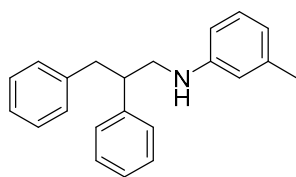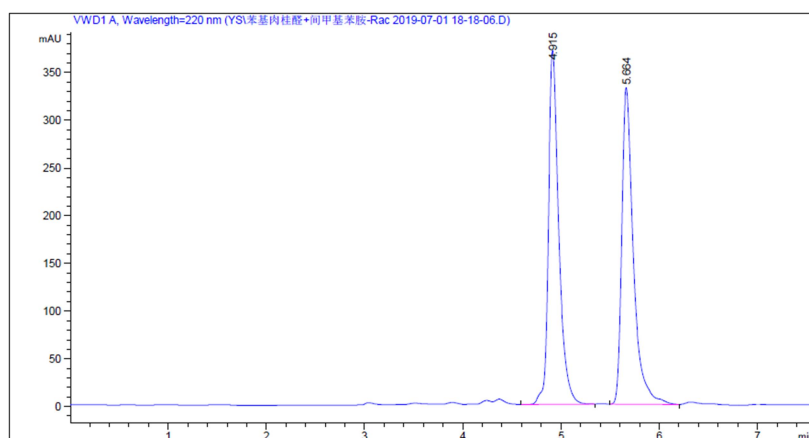

| 峰 # | 保留时间 [min] | 类型 | 峰宽 [min] | 峰面积 [mAU*s] | 峰高 [mAU]  | 峰面积 %   |
|-----|------------|----|----------|-------------|-----------|---------|
| 1   | 4.915      | BV | 0.1093   | 2711.49365  | 370.76077 | 49.8140 |
| 2   | 5.664      | BV | 0.1221   | 2731.74292  | 331.65561 | 50.1860 |

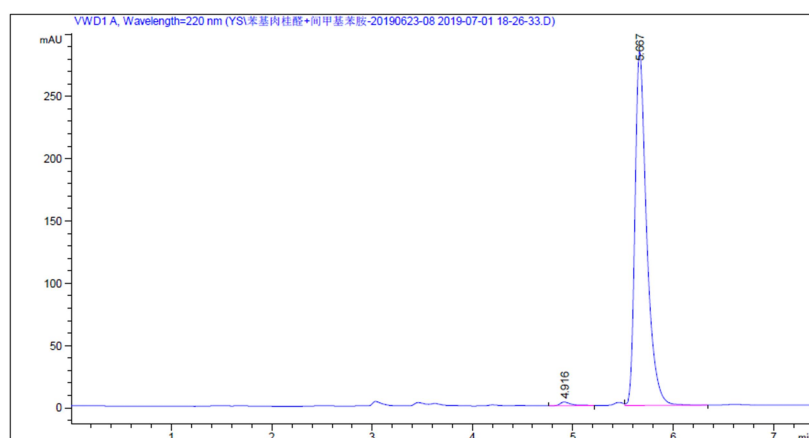

| 峰 # | 保留时间 [min] | 类型 | 峰宽 [min] | 峰面积 [mAU*s] | 峰高 [mAU]  | 峰面积 %   |
|-----|------------|----|----------|-------------|-----------|---------|
| 1   | 4.916      | BB | 0.1120   | 22.65114    | 2.96972   | 0.9737  |
| 2   | 5.667      | VB | 0.1215   | 2303.65649  | 284.39969 | 99.0263 |

**Supplementary Figure 37.** HPLC spectra for racemic and chiral **3ae**.

***N*-(2,3-diphenylpropyl)-3-(trifluoromethyl)aniline (3af)**: 98% yield, 95% ee, colorless oil.<sup>1</sup>H

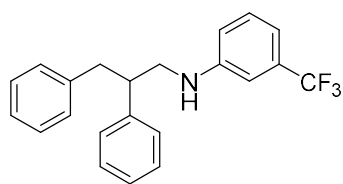

NMR(500 MHz, CDCl<sub>3</sub>): δ 7.30 (t, *J* = 7.4 Hz, 2H), 7.27–7.12 (m, 7H), 7.09 (d, *J* = 7.4 Hz, 2H), 6.87 (d, *J* = 7.6 Hz, 1H), 6.59 (s, 1H), 6.51 (dd, *J* = 8.2, 2.3 Hz, 1H), 3.63 (s, 1H), 3.44 (dd, *J* = 12.4, 4.9 Hz, 1H), 3.26 (dd, *J* = 12.4, 9.0 Hz, 1H), 3.21–3.12 (m, 1H), 3.05–2.90 (m, 2H).; <sup>13</sup>C NMR (125 MHz, CDCl<sub>3</sub>): δ148.03,

142.31, 139.60, 131.45 (q, *J* = 31.7 Hz), 129.48, 128.97, 128.76, 128.39, 127.76, 126.99, 126.28, 125.39, 123.23, 115.90, 113.66 (q, *J* = 4.0 Hz), 108.94 (q, *J* = 3.9 Hz), 48.18, 46.83, 40.94. HRMS (ESI) *m/z* calcd for C<sub>22</sub>H<sub>21</sub>F<sub>3</sub>N<sup>+</sup> (M+H)<sup>+</sup> 356.16206, found 356.16202. Enantiomeric excess was determined by chiral HPLC: Chiralpak IA–3 column, Hex/IPA=98:2, 1 mL/min, 220 nm, 6.53 min (minor), 7.45 min (major).

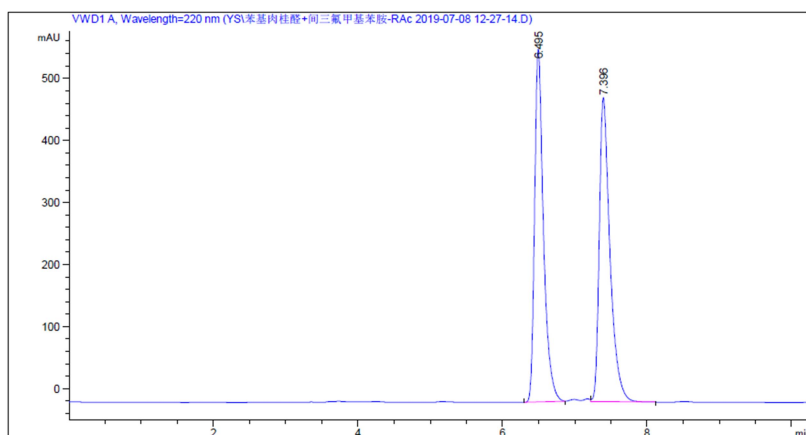

| 峰 # | 保留时间 [min] | 类型 | 峰宽 [min] | 峰面积 [mAU*s] | 峰高 [mAU]  | 峰面积 %   |
|-----|------------|----|----------|-------------|-----------|---------|
| 1   | 6.495      | BB | 0.1276   | 4857.46875  | 568.76630 | 49.1170 |
| 2   | 7.396      | VB | 0.1539   | 5032.11475  | 489.67462 | 50.8830 |

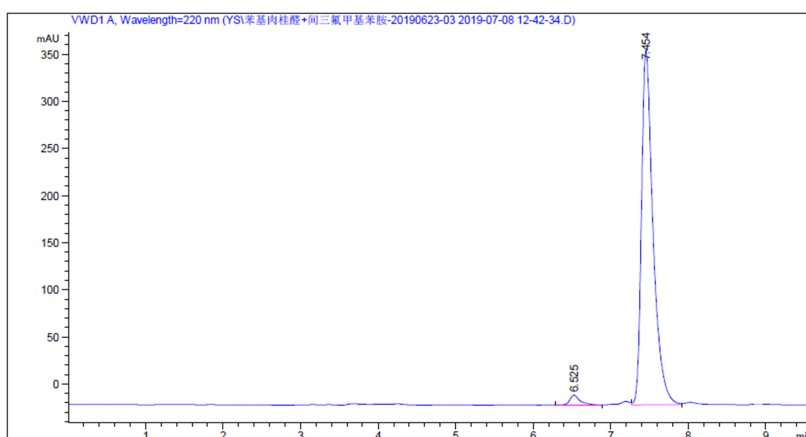

| 峰 # | 保留时间 [min] | 类型 | 峰宽 [min] | 峰面积 [mAU*s] | 峰高 [mAU]  | 峰面积 %   |
|-----|------------|----|----------|-------------|-----------|---------|
| 1   | 6.525      | VB | 0.1343   | 96.02958    | 10.43823  | 2.3974  |
| 2   | 7.454      | VV | 0.1551   | 3909.54980  | 376.52710 | 97.6026 |

**Supplementary Figure 38.** HPLC spectra for racemic and chiral **3af**.



***N*-(2,3-diphenylpropyl)-3,5-dimethylaniline (3ag)**: 95% yield, 96% ee, colorless oil.<sup>1</sup>H

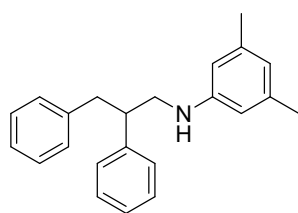

NMR(500 MHz, CDCl<sub>3</sub>): δ 7.29 (t, *J* = 7.5 Hz, 2H), 7.26–7.14 (m, 6H), 7.13–7.05 (m, 2H), 6.32 (s, 1H), 6.05 (s, 2H), 3.43 (dd, *J* = 12.0, 4.5 Hz, 1H), 3.38 (s, 1H), 3.27–3.09 (m, 2H), 2.97 (dd, *J* = 7.2, 2.1 Hz, 2H), 2.17 (s, 6H); <sup>13</sup>C NMR (125 MHz, CDCl<sub>3</sub>): δ 148.00, 142.82, 139.92, 138.73, 129.08, 128.59, 128.25, 127.83, 126.72, 126.08, 119.36, 110.91, 48.46, 46.99, 40.92, 21.41. HRMS (ESI) *m/z* calcd for C<sub>23</sub>H<sub>26</sub>N<sup>+</sup> (*M*+H)<sup>+</sup> 316.20598, found 316.20578. Enantiomeric excess was determined by chiral HPLC: Chiralpak IB–3 column, Hex/IPA=95:5, 1 mL/min, 220 nm, 5.59 min (major), 6.69 min (minor).

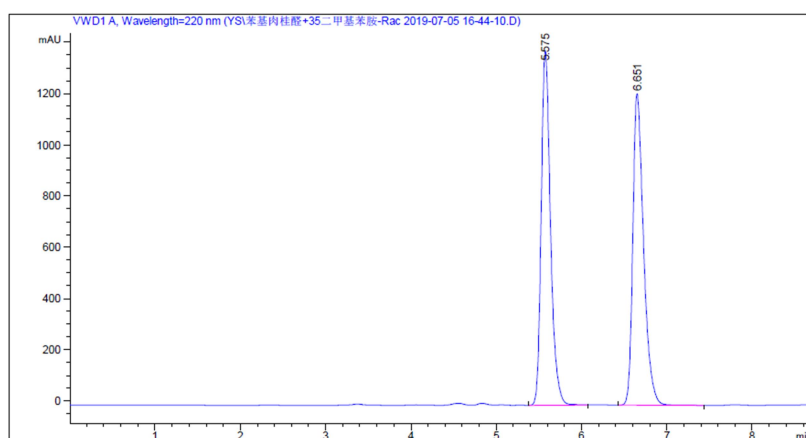

| 峰 # | 保留时间 [min] | 类型 | 峰宽 [min] | 峰面积 [mAU*s] | 峰高 [mAU]   | 峰面积 %   |
|-----|------------|----|----------|-------------|------------|---------|
| 1   | 5.575      | BV | 0.1165   | 1.04815e4   | 1381.78674 | 49.6330 |
| 2   | 6.651      | BB | 0.1321   | 1.06365e4   | 1215.89832 | 50.3670 |

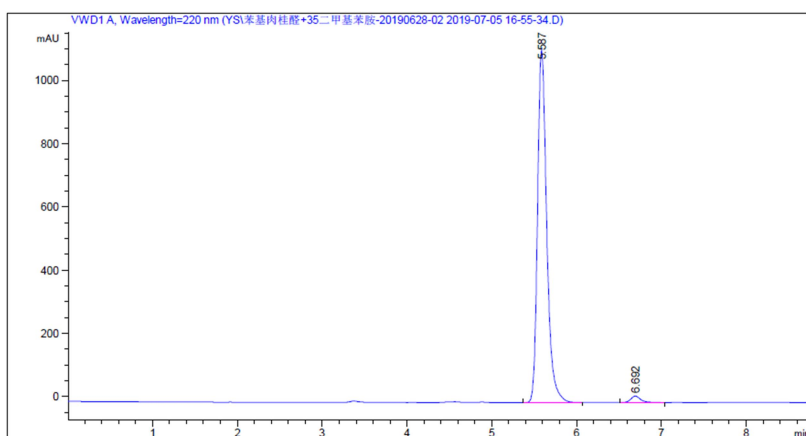

| 峰 # | 保留时间 [min] | 类型 | 峰宽 [min] | 峰面积 [mAU*s] | 峰高 [mAU]   | 峰面积 %   |
|-----|------------|----|----------|-------------|------------|---------|
| 1   | 5.587      | BV | 0.1148   | 8385.06445  | 1114.56799 | 98.0653 |
| 2   | 6.692      | VB | 0.1230   | 165.42299   | 20.32131   | 1.9347  |

**Supplementary Figure 39.** HPLC spectra for racemic and chiral **3ag**.

***N*-(2,3-diphenylpropyl)-2-methylaniline (3ah)**: 96% yield, 97% ee, colorless oil.  $^1\text{H}$  NMR (500 MHz,  $\text{CDCl}_3$ ):  $\delta$  7.29 (t,  $J = 7.5$  Hz, 2H), 7.26–7.14 (m, 6H), 7.11 (d,  $J = 7.4$  Hz, 2H), 7.08–7.02 (m, 1H), 6.96 (d,  $J = 7.2$  Hz, 1H), 6.61 (t,  $J = 7.3$  Hz, 1H), 6.48 (d,  $J = 8.0$  Hz, 1H), 3.49 (dd,  $J = 10.0, 6.6$  Hz, 1H), 3.32 (s, 1H), 3.28–3.19 (m, 2H), 3.02 (d,  $J = 6.2$  Hz, 2H), 1.80 (s, 3H);  $^{13}\text{C}$  NMR (125 MHz,  $\text{CDCl}_3$ ):  $\delta$  145.86, 142.67, 139.86, 129.95, 129.02, 128.65, 128.29, 127.76, 127.00, 126.83, 126.13, 122.10, 116.88, 109.83, 48.61, 46.85, 40.83, 17.01. HRMS (ESI)  $m/z$  calcd for  $\text{C}_{22}\text{H}_{24}\text{N}^+$  ( $\text{M}+\text{H}$ ) $^+$  302.19033, found 302.19034. Enantiomeric excess was determined by chiral HPLC: Chiralpak IB–3 column, Hex/IPA=95:5, 1 mL/min, 220 nm, 6.40 min (minor), 7.50 min (major).

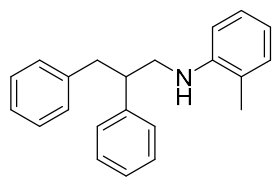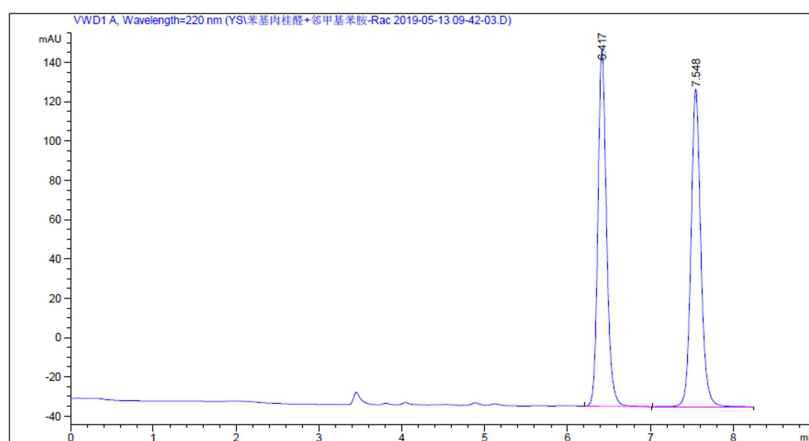

| 峰 # | 保留时间 [min] | 类型  | 峰宽 [min] | 峰面积 [mAU*s] | 峰高 [mAU]  | 峰面积 %   |
|-----|------------|-----|----------|-------------|-----------|---------|
| 1   | 6.417      | VB  | 0.1105   | 1311.97095  | 181.12910 | 49.6629 |
| 2   | 7.548      | BBA | 0.1261   | 1329.78149  | 161.48921 | 50.3371 |

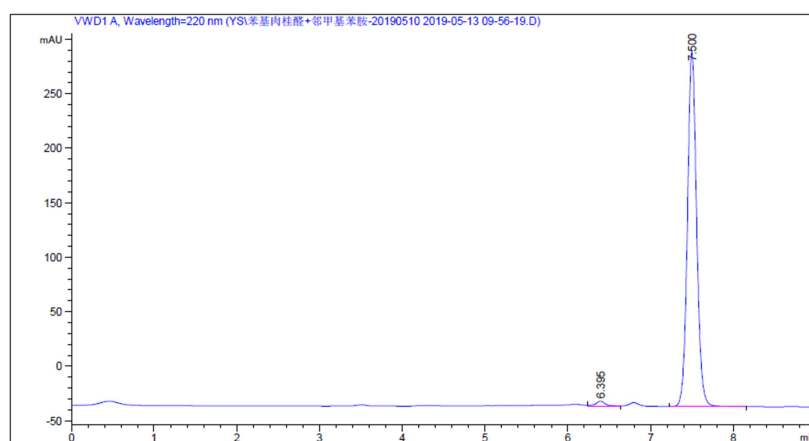

| 峰 # | 保留时间 [min] | 类型 | 峰宽 [min] | 峰面积 [mAU*s] | 峰高 [mAU]  | 峰面积 %   |
|-----|------------|----|----------|-------------|-----------|---------|
| 1   | 6.395      | VB | 0.1143   | 33.24929    | 4.39539   | 1.3083  |
| 2   | 7.500      | BB | 0.1178   | 2508.10645  | 325.97748 | 98.6917 |

**Supplementary Figure 40.** HPLC spectra for racemic and chiral **3ah**.

**2-((2,3-diphenylpropyl)amino)phenol (3ai):** 93% yield, 97% ee, brown oil.  $^1\text{H}$  NMR(500 MHz,  $\text{CDCl}_3$ ):  $\delta$  7.31–7.11 (m, 9H), 7.05 (d,  $J = 7.4$  Hz, 2H), 6.77 (t,  $J = 7.6$  Hz, 1H), 6.63–6.51 (m, 2H), 3.41 (dd,  $J = 12.2, 5.2$  Hz, 1H), 3.26 (dd,  $J = 12.2, 8.5$  Hz, 1H), 3.19 (p,  $J = 7.1$  Hz, 1H), 3.07–2.90 (m, 2H);  $^{13}\text{C}$  NMR (125 MHz,  $\text{CDCl}_3$ ):  $\delta$  144.02, 142.63, 139.84, 136.72, 129.04, 128.54, 128.18, 127.81, 126.68, 126.01, 121.32, 117.93, 114.42, 112.73, 49.11, 47.04, 40.75. HRMS (ESI)  $m/z$  calcd for  $\text{C}_{21}\text{H}_{22}\text{NO}^+$  (M+H) $^+$  304.16959, found 304.16949. Enantiomeric excess was determined by chiral HPLC: Chiralpak IA–3 column, Hex/IPA=90:10, 1 mL/min, 220 nm, 16.93 min (major), 18.00 min (minor).

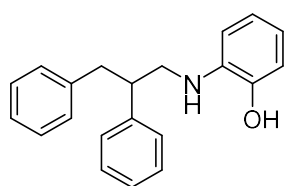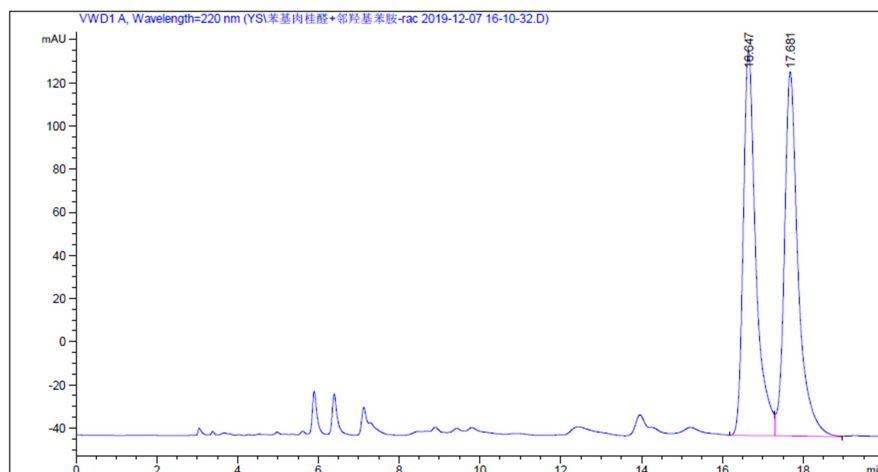

| 峰 # | 保留时间 [min] | 类型 | 峰宽 [min] | 峰面积 [mAU*s] | 峰高 [mAU]  | 峰面积 %   |
|-----|------------|----|----------|-------------|-----------|---------|
| 1   | 16.647     | BV | 0.3240   | 3879.57593  | 178.17125 | 49.2528 |
| 2   | 17.681     | VV | 0.3499   | 3997.29199  | 169.02762 | 50.7472 |

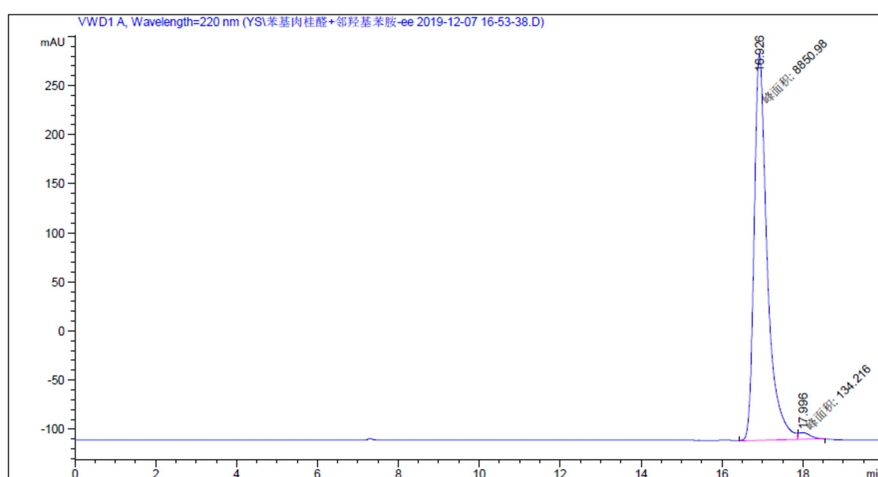

| 峰 # | 保留时间 [min] | 类型 | 峰宽 [min] | 峰面积 [mAU*s] | 峰高 [mAU]  | 峰面积 %   |
|-----|------------|----|----------|-------------|-----------|---------|
| 1   | 16.926     | MF | 0.3755   | 8850.97559  | 392.81287 | 98.5062 |
| 2   | 17.996     | FM | 0.3355   | 134.21637   | 6.66814   | 1.4938  |

**Supplementary Figure 41.** HPLC spectra for racemic and chiral **3ai**.

**2-chloro-*N*-(2,3-diphenylpropyl)aniline (3aj)**: 88% yield, 99% ee, colorless oil.  $^1\text{H}$  NMR (500 MHz,  $\text{CDCl}_3$ ):  $\delta$  7.31 (t,  $J = 7.5$  Hz, 2H), 7.26–7.13 (m, 7H), 7.10 (d,  $J = 7.5$  Hz, 2H), 7.05 (t,  $J = 7.7$  Hz, 1H), 6.57 (t,  $J = 7.6$  Hz, 1H), 6.48 (d,  $J = 8.1$  Hz, 1H), 4.21 (s, 1H), 3.52–3.39 (m, 1H), 3.33–3.15 (m, 2H), 3.03 (d,  $J = 7.3$  Hz, 2H);  $^{13}\text{C}$  NMR (125 MHz,  $\text{CDCl}_3$ ):  $\delta$  143.72, 142.31, 139.71, 129.04, 128.69, 128.31, 127.74, 127.66, 126.90, 126.18, 119.28, 117.08, 111.24, 48.25, 46.84, 40.47. HRMS (ESI)  $m/z$  calcd for  $\text{C}_{21}\text{H}_{21}\text{ClN}^+$  ( $\text{M}+\text{H}$ ) $^+$  322.13570, found 322.13568. Enantiomeric excess was determined by chiral HPLC: Chiralpak IB-3 column, Hex/IPA=99:1, 1 mL/min, 220 nm, 6.04 min (minor), 6.25 min (major).

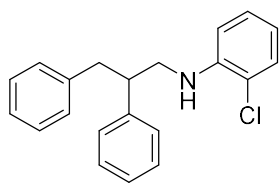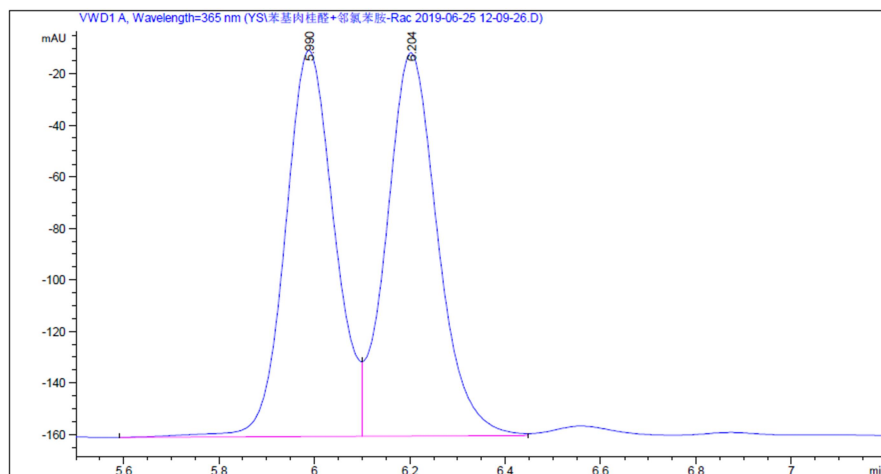

| 峰 # | 保留时间 [min] | 类型 | 峰宽 [min] | 峰面积 [mAU*s] | 峰高 [mAU]  | 峰面积 %   |
|-----|------------|----|----------|-------------|-----------|---------|
| 1   | 5.990      | BV | 0.1091   | 1068.76929  | 149.98941 | 49.0297 |
| 2   | 6.204      | VV | 0.1140   | 1111.07312  | 148.90907 | 50.9703 |

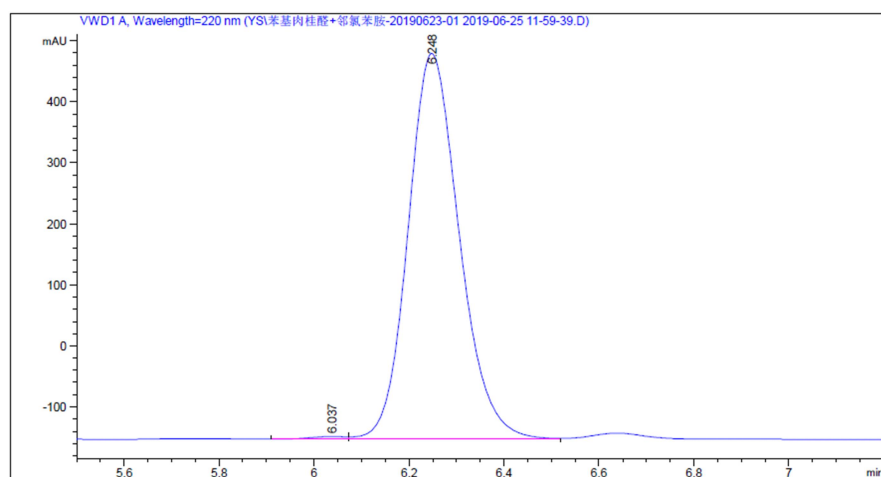

| 峰 # | 保留时间 [min] | 类型 | 峰宽 [min] | 峰面积 [mAU*s] | 峰高 [mAU]  | 峰面积 %   |
|-----|------------|----|----------|-------------|-----------|---------|
| 1   | 6.037      | BV | 0.0797   | 22.78313    | 4.45034   | 0.4782  |
| 2   | 6.248      | VV | 0.1155   | 4741.33984  | 631.84583 | 99.5218 |

**Supplementary Figure 42.** HPLC spectra for racemic and chiral **3aj**.

***N*-(2,3-diphenylpropyl)naphthalen-1-amine (3ak)**: 95% yield, 97% ee, colorless oil.  $^1\text{H}$  NMR(500 MHz,  $\text{CDCl}_3$ ):  $\delta$  7.72 (d,  $J = 8.1$  Hz, 1H), 7.41–7.08 (m, 15H), 6.47 (d,  $J = 7.5$  Hz, 1H), 4.18 (s, 1H), 3.58 (dd,  $J = 11.1, 4.4$  Hz, 1H), 3.44–3.28 (m, 2H), 3.07 (d,  $J = 6.8$  Hz, 2H);  $^{13}\text{C}$  NMR (125 MHz,  $\text{CDCl}_3$ ):  $\delta$  143.11, 142.66, 139.84, 134.22, 129.08, 128.77, 128.50, 128.36, 127.78, 126.95, 126.52, 126.18, 125.58, 124.52, 123.41, 119.66, 117.31, 104.35, 48.75, 46.88, 41.06. HRMS (ESI)  $m/z$  calcd for  $\text{C}_{25}\text{H}_{24}\text{N}^+$  ( $\text{M}+\text{H}$ ) $^+$  338.19033, found 338.19031. Enantiomeric excess was determined by chiral HPLC: Chiralpak IB-3 column, Hex/IPA=90:10, 1 mL/min, 220 nm, 9.15 min (minor), 11.56 min (major).

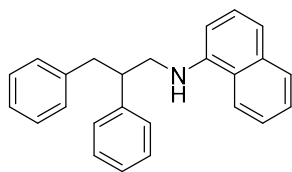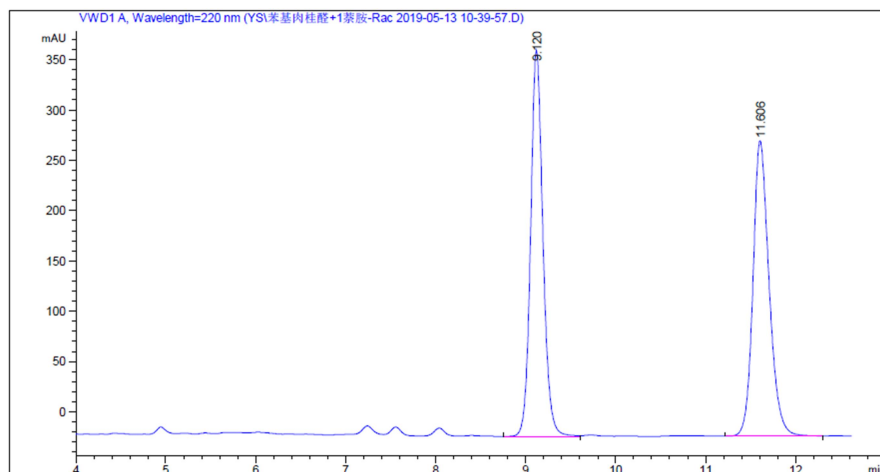

| 峰 # | 保留时间 [min] | 类型 | 峰宽 [min] | 峰面积 [mAU*s] | 峰高 [mAU]  | 峰面积 %   |
|-----|------------|----|----------|-------------|-----------|---------|
| 1   | 9.120      | BV | 0.1452   | 3654.87012  | 383.45068 | 49.9773 |
| 2   | 11.606     | BV | 0.1873   | 3658.18970  | 293.81552 | 50.0227 |

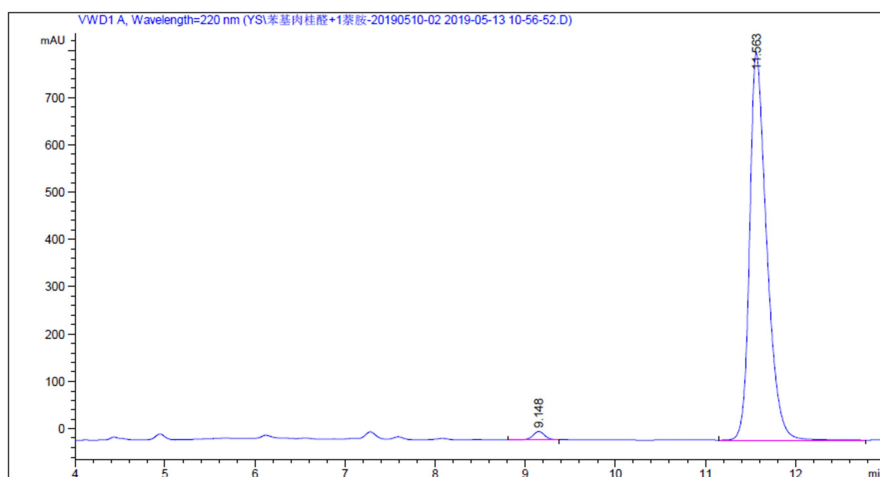

| 峰 # | 保留时间 [min] | 类型 | 峰宽 [min] | 峰面积 [mAU*s] | 峰高 [mAU]  | 峰面积 %   |
|-----|------------|----|----------|-------------|-----------|---------|
| 1   | 9.148      | BV | 0.1438   | 170.15536   | 18.08735  | 1.5568  |
| 2   | 11.563     | BB | 0.1973   | 1.07598e4   | 818.93884 | 98.4432 |

**Supplementary Figure 43.** HPLC spectra for racemic and chiral **3ak**.

**(E)-N-(2,3-diphenylallyl)aniline (4):** colorless oil.  $^1\text{H}$  NMR(500 MHz,  $\text{CDCl}_3$ ):  $\delta$  7.38–7.25 (m, 3H), 7.25–7.13 (m, 4H), 7.11–7.03 (m, 3H), 6.98–6.90 (m, 2H), 6.71 (t,  $J = 7.3$  Hz, 1H), 6.65 (d,  $J = 8.3$  Hz, 3H), 4.10 (s, 2H), 3.94 (s, 1H);  $^{13}\text{C}$  NMR (125 MHz,  $\text{CDCl}_3$ ):  $\delta$  147.99, 139.56, 139.36, 136.70, 129.28, 129.24, 128.85, 128.68, 127.97, 127.51, 127.19, 126.71, 117.64, 113.19, 52.28 .

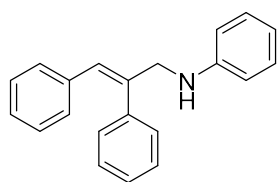

### Procedure for the derivatization of 3y and 3n

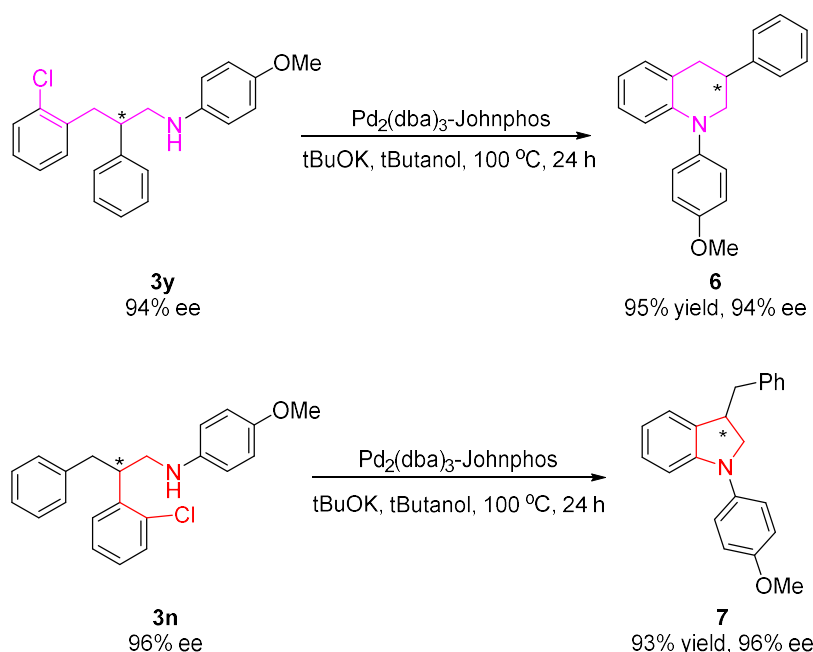

**Supplementary Figure 44.** Derivatization of **3y** and **3n** for the synthesis of cyclic chiral amine **6** and **7**.

#### General procedure:<sup>[12]</sup>

An oven-dried vial equipped with a magnetic stir bar and fitted with a Teflon septum was charged with  $\text{Pd}_2(\text{dba})_3$  (0.05 equiv) and JohnPhos (0.1 equiv). The vessel was evacuated three times and backfilled with argon. Subsequently, the TAA (3 mL) was added via a syringe and the mixture was preheated at 100 °C for 30 min. Another oven-dried vial was charged with tBuOK (1.4 equiv) and substrate **3y** or **3n**. Also, this vessel was evacuated three times and backfilled with argon. The solution of the activated catalyst was transferred from the first vial into the second one via a syringe. The vessel was then heated at 100 °C until the starting component was fully consumed (control by TLC). The mixture was then diluted with EtOAc and filtered through a small plug of Celite® S which was subsequently thoroughly washed with EtOAc. The filtrate was concentrated in vacuo and the residue was purified by column chromatography.

**1-(4-methoxyphenyl)-3-phenyl-1,2,3,4-tetrahydroquinoline(6):** 95% yield, 94% ee, colorless

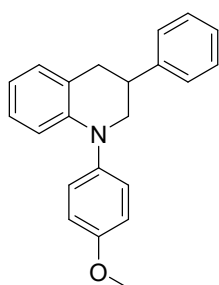

oil.  $^1\text{H}$  NMR (500 MHz,  $\text{CDCl}_3$ ):  $\delta$  7.44–7.36 (m, 2H), 7.36–7.30 (m, 3H), 7.27–7.20 (m, 2H), 7.14 (dd,  $J = 7.4, 1.4$  Hz, 1H), 7.04–6.94 (m, 3H), 6.78–6.72 (m, 1H), 6.63 (dd,  $J = 8.3, 1.2$  Hz, 1H), 3.87 (s, 3H), 3.79–3.65 (m, 2H), 3.43–3.34 (m, 1H), 3.26–3.06 (m, 2H);  $^{13}\text{C}$  NMR (125 MHz,  $\text{CDCl}_3$ ):  $\delta$  156.88, 144.89, 143.44, 140.96, 129.49, 128.65, 127.58, 127.25, 126.75, 122.90, 117.44, 114.89, 114.37, 57.68, 55.53, 38.79, 35.37. HRMS (ESI)  $m/z$  calcd for  $\text{C}_{21}\text{H}_{22}\text{NO}^+$  ( $\text{M}+\text{H}$ ) $^+$  316.16959, found 316.20612.

Enantiomeric excess was determined by chiral HPLC: Chiralpak IA-3 column, Hex/IPA=90:10, 1 mL/min, 220 nm, 7.78 min (minor), 8.75 min (major).

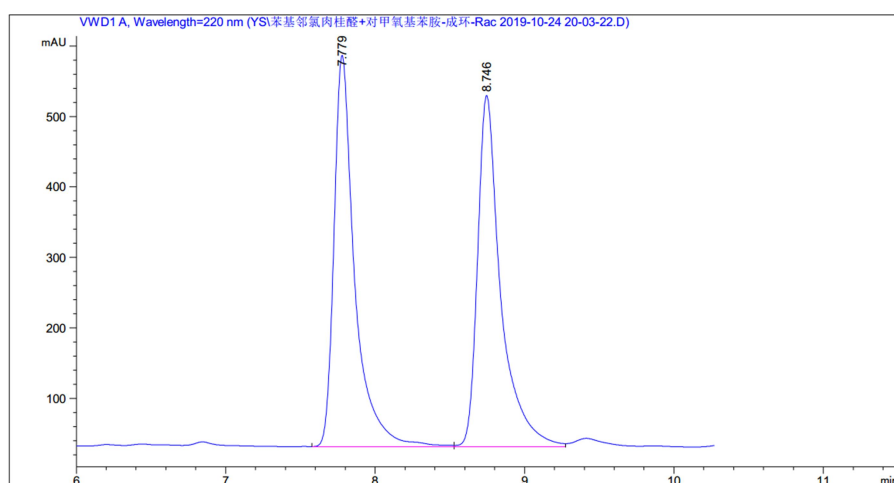

| 峰 # | 保留时间 [min] | 类型 | 峰宽 [min] | 峰面积 [mAU*s] | 峰高 [mAU]  | 峰面积 %   |
|-----|------------|----|----------|-------------|-----------|---------|
| 1   | 7.779      | BV | 0.1427   | 5358.72363  | 554.89233 | 49.8869 |
| 2   | 8.746      | VV | 0.1580   | 5383.02539  | 498.36472 | 50.1131 |

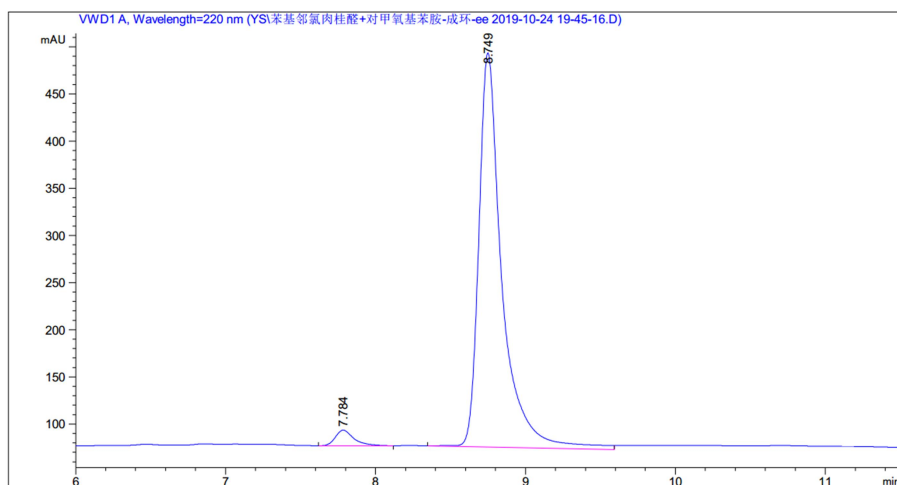

| 峰 # | 保留时间 [min] | 类型 | 峰宽 [min] | 峰面积 [mAU*s] | 峰高 [mAU]  | 峰面积 %   |
|-----|------------|----|----------|-------------|-----------|---------|
| 1   | 7.784      | BB | 0.1298   | 141.91850   | 16.59289  | 3.0660  |
| 2   | 8.749      | BV | 0.1573   | 4486.80127  | 417.60306 | 96.9340 |

**Supplementary Figure 45.** HPLC spectra for racemic and chiral **6**

**3-benzyl-1-(4-methoxyphenyl)indoline(7):** 93% yield, 96% ee, colorless oil.  $^1\text{H}$  NMR(500 MHz,  $\text{CDCl}_3$ ):  $\delta$  7.30 (t,  $J = 7.6$  Hz, 2H), 7.25–7.20 (m, 3H), 7.14 (d,  $J = 9.0$  Hz, 2H), 7.09–7.00 (m, 2H), 6.94–6.85 (m, 3H), 6.69 (t,  $J = 7.3$  Hz, 1H), 3.90–3.83 (m, 1H), 3.79 (s, 3H), 3.69–3.53 (m, 2H), 3.15 (dd,  $J = 13.8, 5.7$  Hz, 1H), 2.85 (dd,  $J = 13.8, 9.4$  Hz, 1H);  $^{13}\text{C}$  NMR (125 MHz,  $\text{CDCl}_3$ ):  $\delta$  154.81, 148.23, 139.82, 137.75, 133.79, 129.08, 128.50, 127.65, 126.32, 124.36, 120.64, 118.16, 114.53, 107.55, 58.62, 55.61, 41.90, 40.79. HRMS (ESI)  $m/z$  calcd for  $\text{C}_{21}\text{H}_{22}\text{NO}^+$  ( $\text{M}+\text{H}$ ) $^+$  316.16959, found 316.20627. Enantiomeric excess was determined by chiral HPLC: Chiralpak IA–3 column, Hex/IPA=90:10, 1 mL/min, 220 nm, 8.30 min (major), 9.05 min (minor).

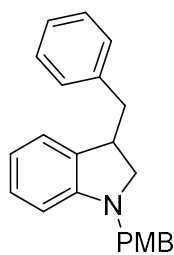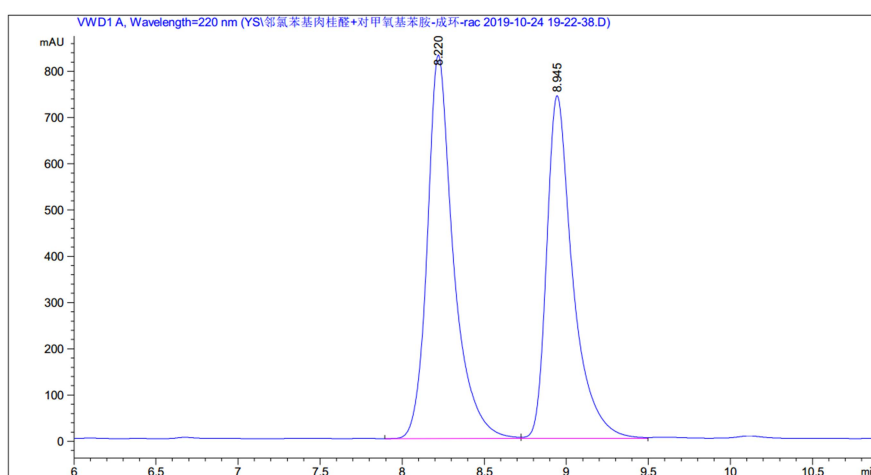

| 峰 # | 保留时间 [min] | 类型 | 峰宽 [min] | 峰面积 [mAU*s] | 峰高 [mAU]  | 峰面积 %   |
|-----|------------|----|----------|-------------|-----------|---------|
| 1   | 8.220      | BV | 0.1635   | 9204.32031  | 829.07086 | 52.8927 |
| 2   | 8.945      | VV | 0.1651   | 8197.54297  | 740.75647 | 47.1073 |

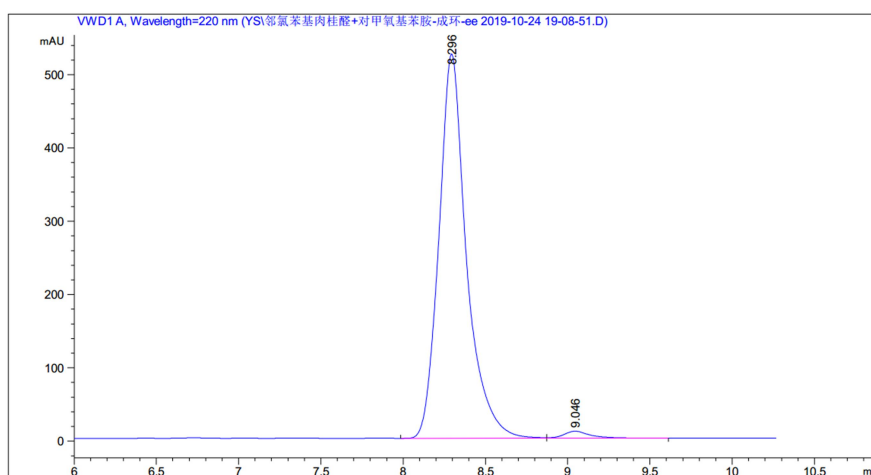

| 峰 # | 保留时间 [min] | 类型 | 峰宽 [min] | 峰面积 [mAU*s] | 峰高 [mAU]  | 峰面积 %   |
|-----|------------|----|----------|-------------|-----------|---------|
| 1   | 8.296      | BV | 0.1700   | 6110.89209  | 524.25092 | 98.2407 |
| 2   | 9.046      | VB | 0.1662   | 109.43569   | 9.65883   | 1.7593  |

**Supplementary Figure 46.** HPLC spectra for racemic and chiral 7.



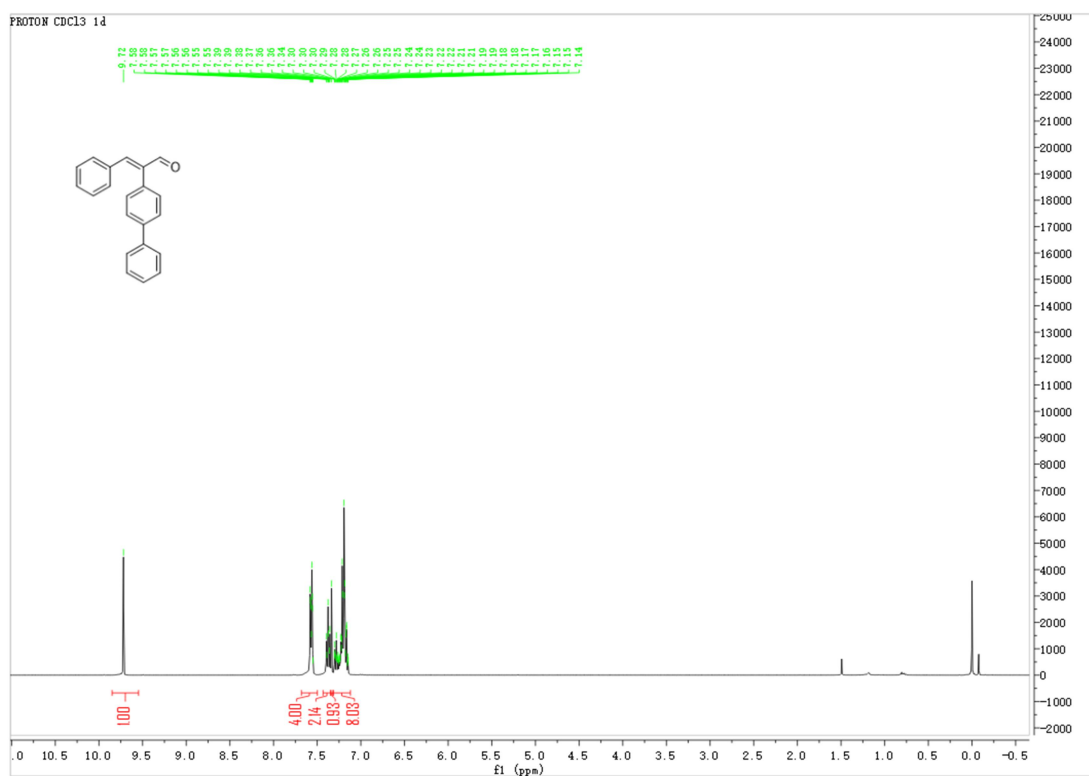

Supplementary Figure 47.  ${}^1\text{H}$  NMR spectrum of **1d** in  $\text{CDCl}_3$ .

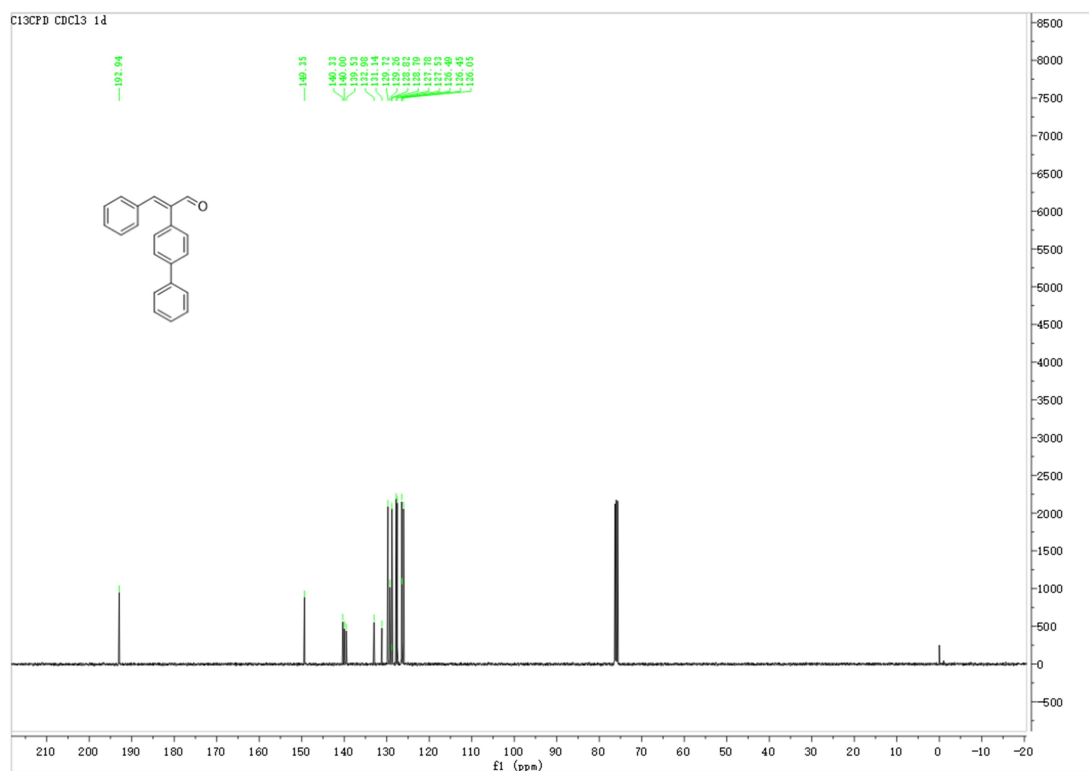

Supplementary Figure 48.  ${}^{13}\text{C}$  NMR spectrum of **1d** in  $\text{CDCl}_3$ .

00047 #16 RT: 0.21 AV: 1 NL: 2.29E8  
T: FTM S + p ESI Full ms [100.00-1000.00]

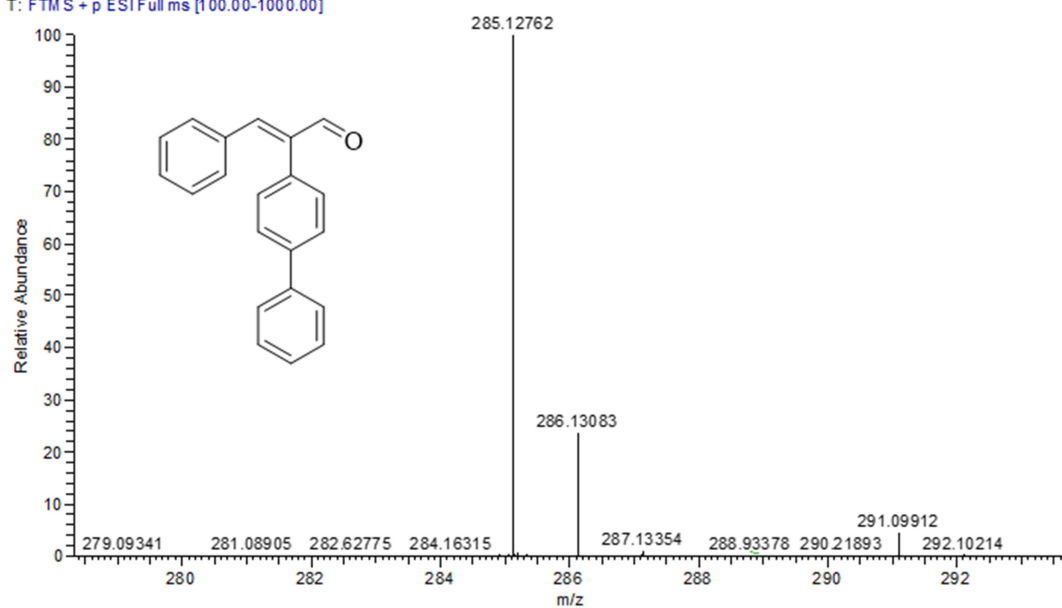

Supplementary Figure 49. HRMS of 1d.

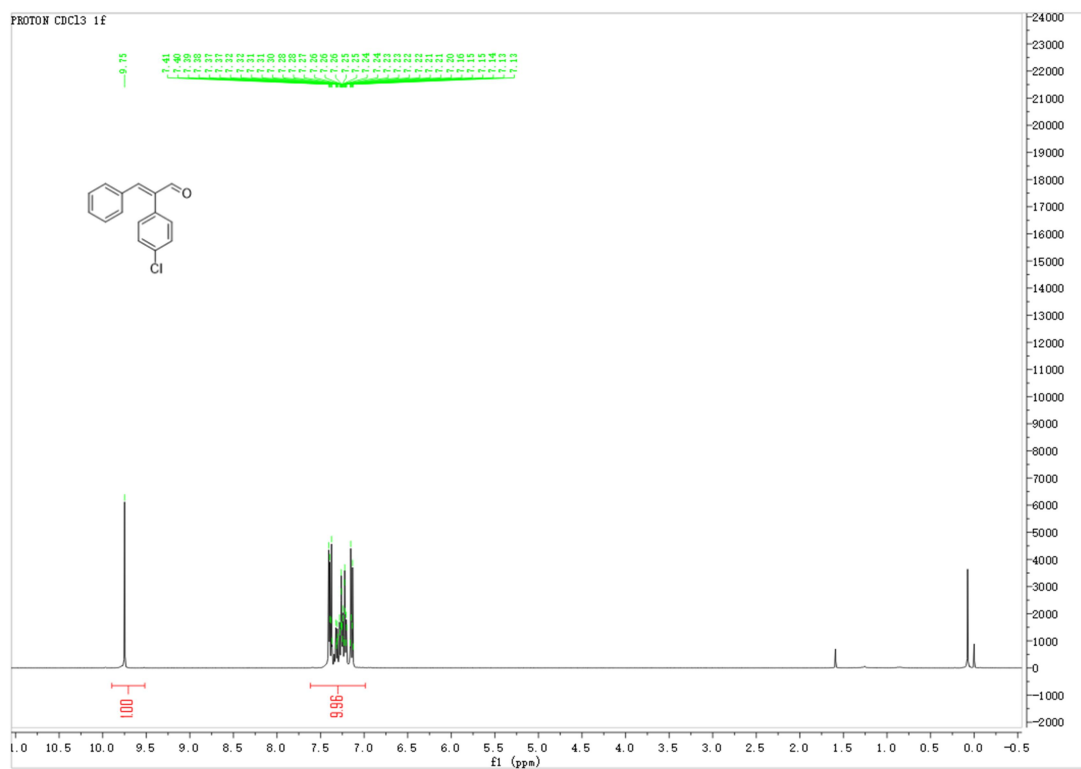

Supplementary Figure 50.  $^1\text{H}$  NMR spectrum of 1f in  $\text{CDCl}_3$ .

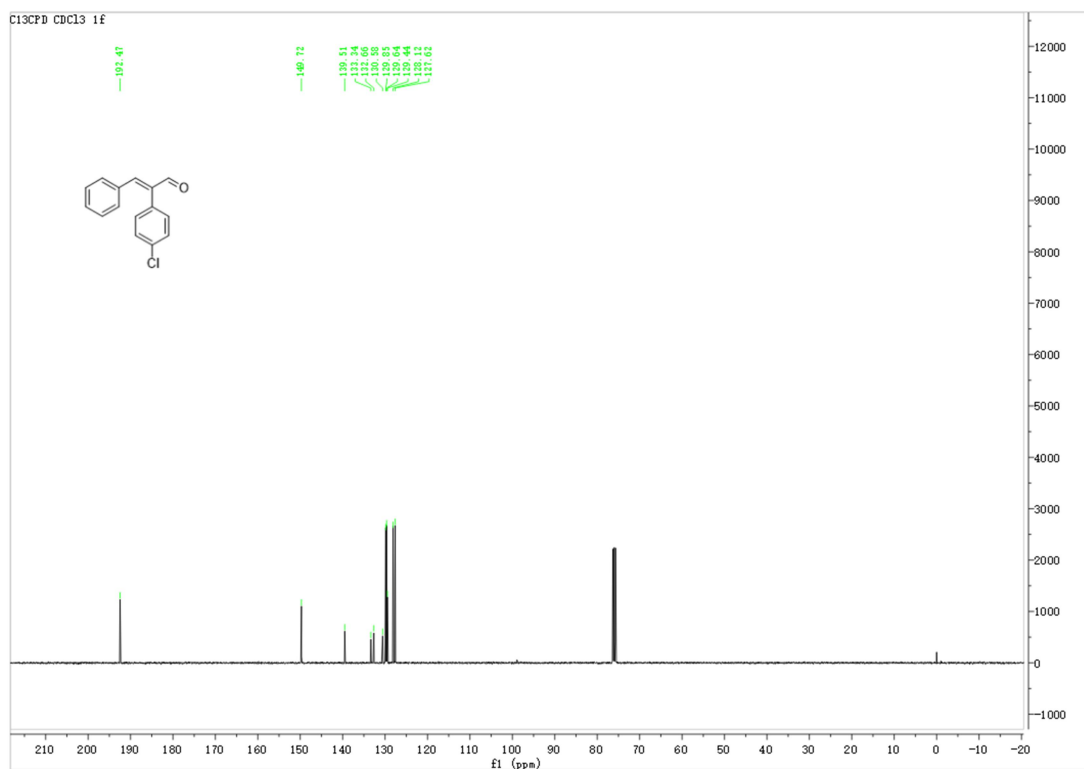

Supplementary Figure 51.  $^{13}\text{C}$  NMR spectrum of **1f** in  $\text{CDCl}_3$ .

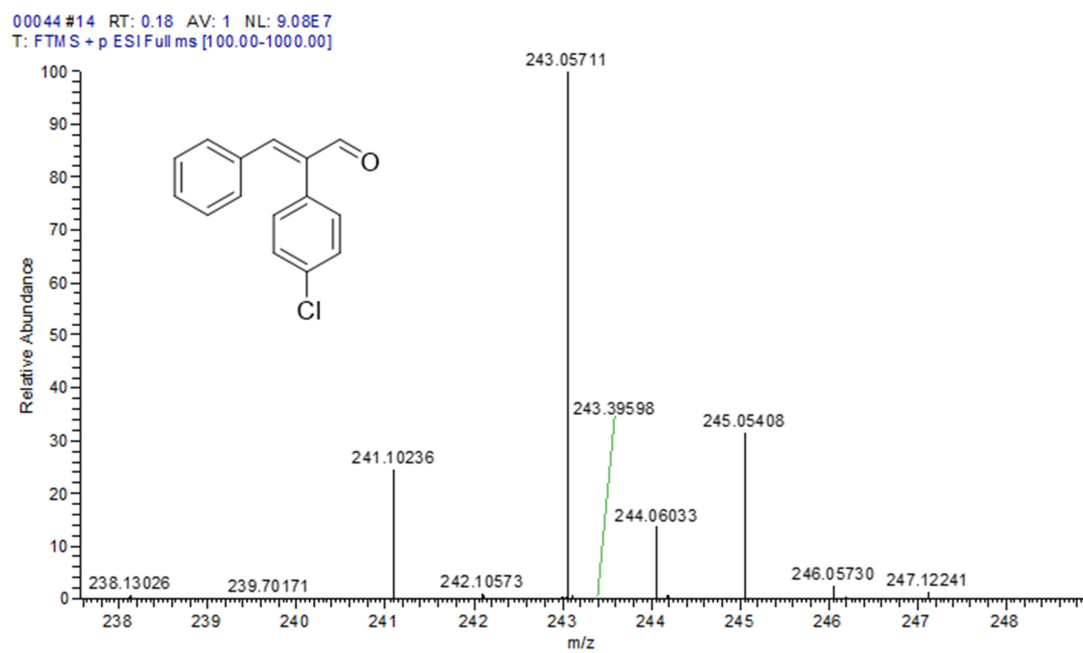

Supplementary Figure 52. HRMS of **1f**.

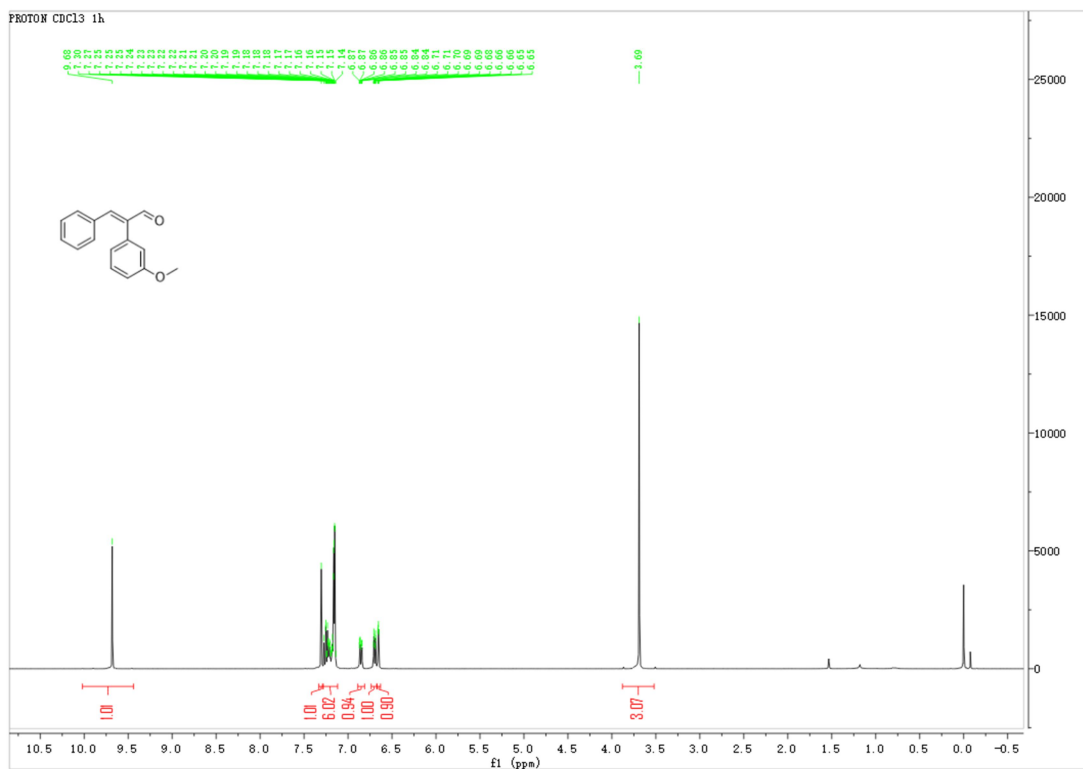

Supplementary Figure 53.  $^1\text{H}$  NMR spectrum of **1h** in  $\text{CDCl}_3$ .

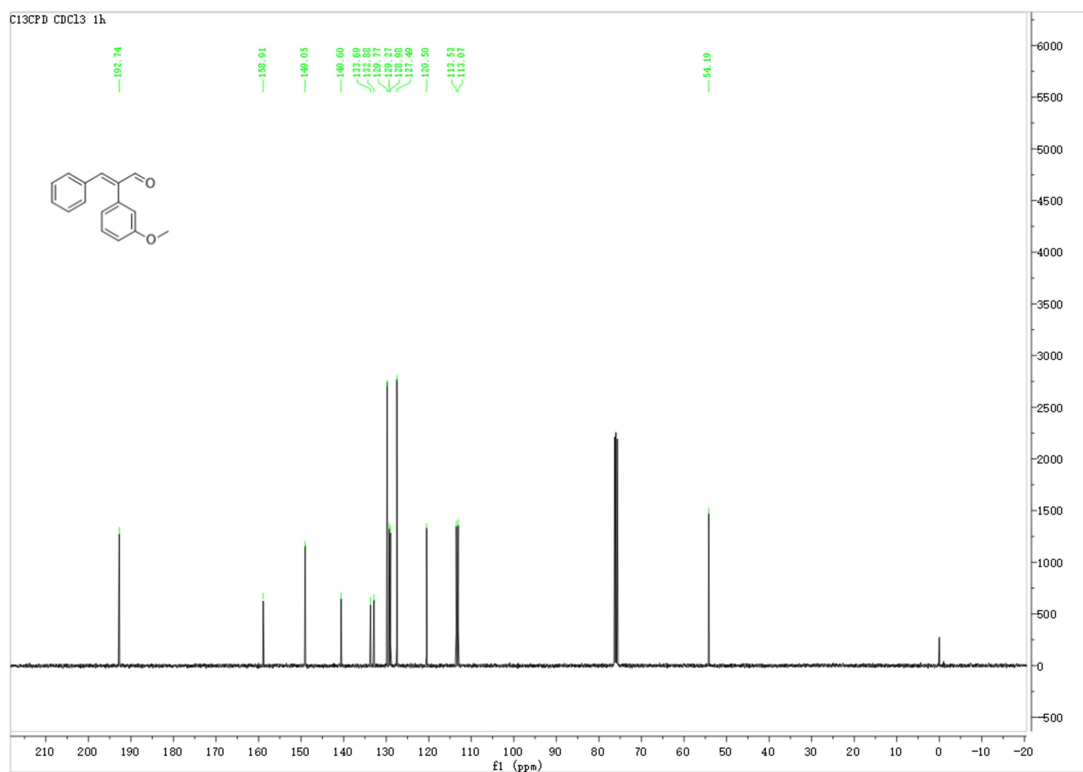

Supplementary Figure 54.  $^{13}\text{C}$  NMR spectrum of **1h** in  $\text{CDCl}_3$ .

00048 #12 RT: 0.15 AV: 1 NL: 1.53E8  
T: FTM S + p ESI Full ms [100.00-1000.00]

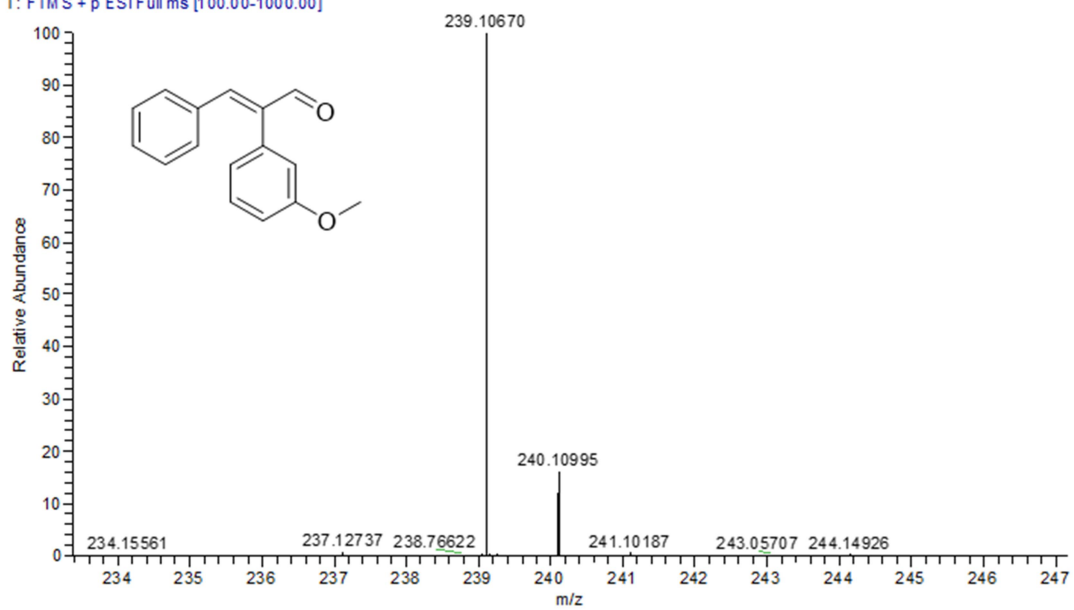

Supplementary Figure 55. HRMS of **1h**.

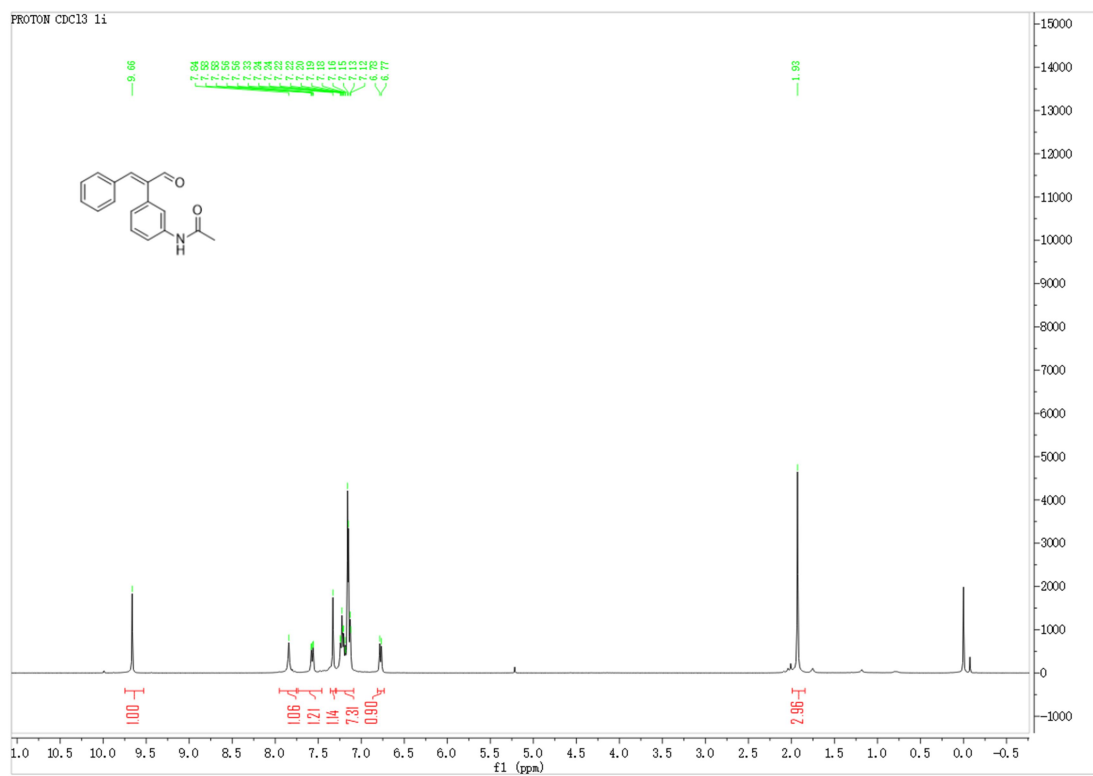

Supplementary Figure 56.  $^1\text{H}$  NMR spectrum of **1i** in  $\text{CDCl}_3$ .

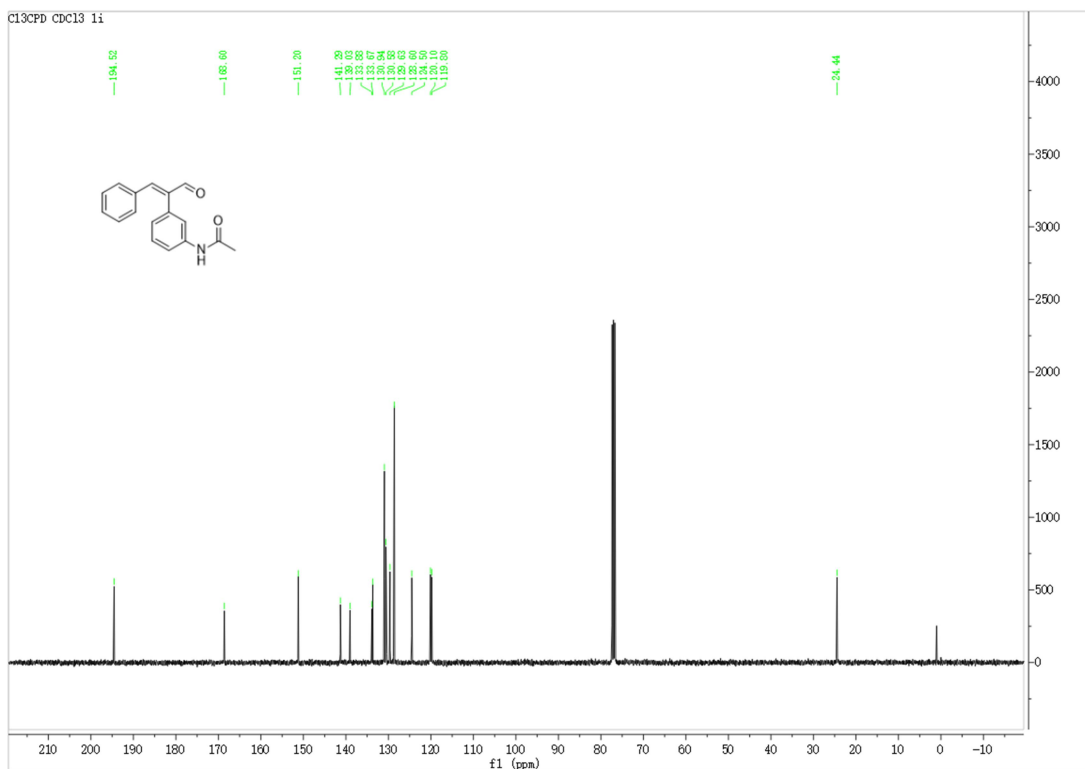

Supplementary Figure 57.  $^{13}\text{C}$  NMR spectrum of **1i** in  $\text{CDCl}_3$ .

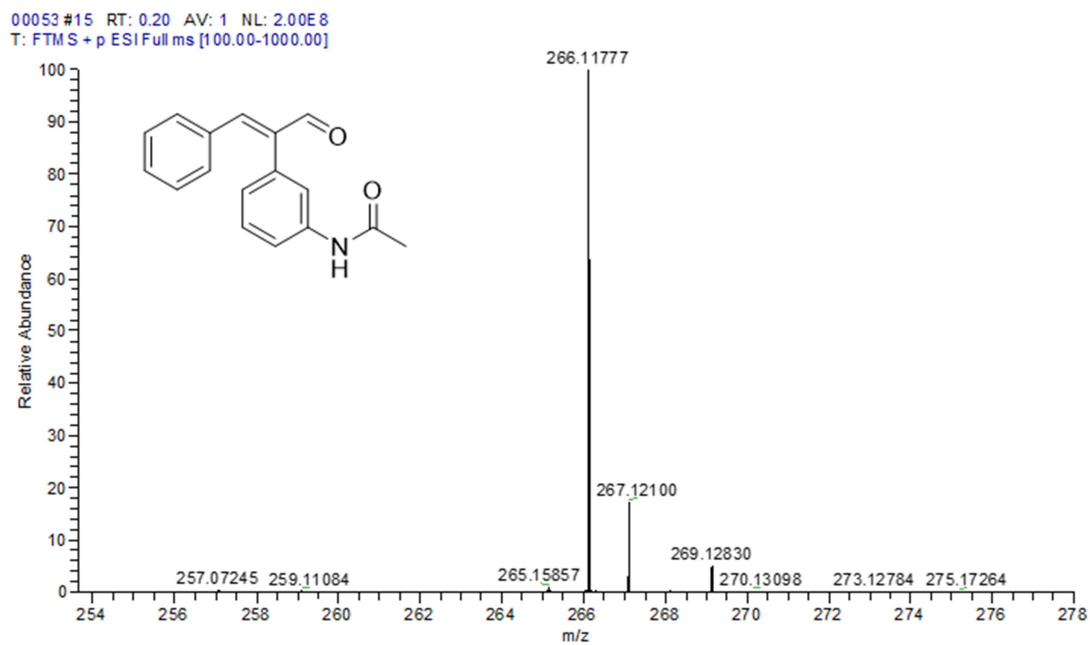

Supplementary Figure 58. HRMS of **1i**.

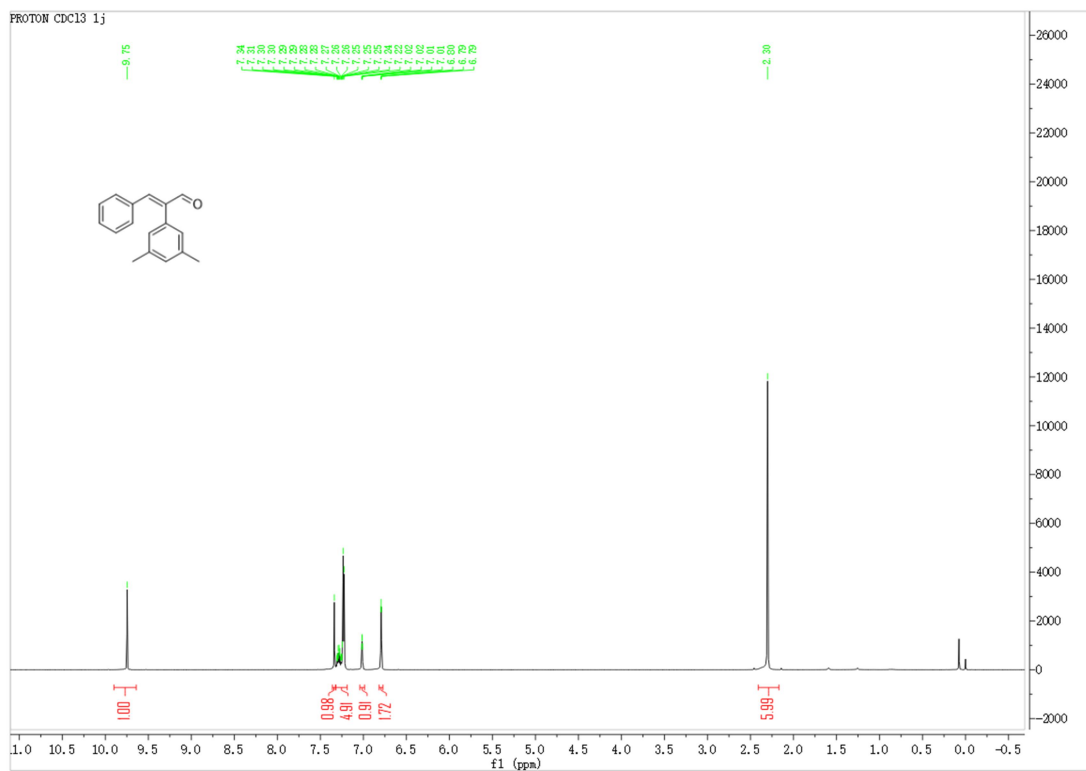

**Supplementary Figure 59.**  $^1\text{H}$  NMR spectrum of **1j** in  $\text{CDCl}_3$ .

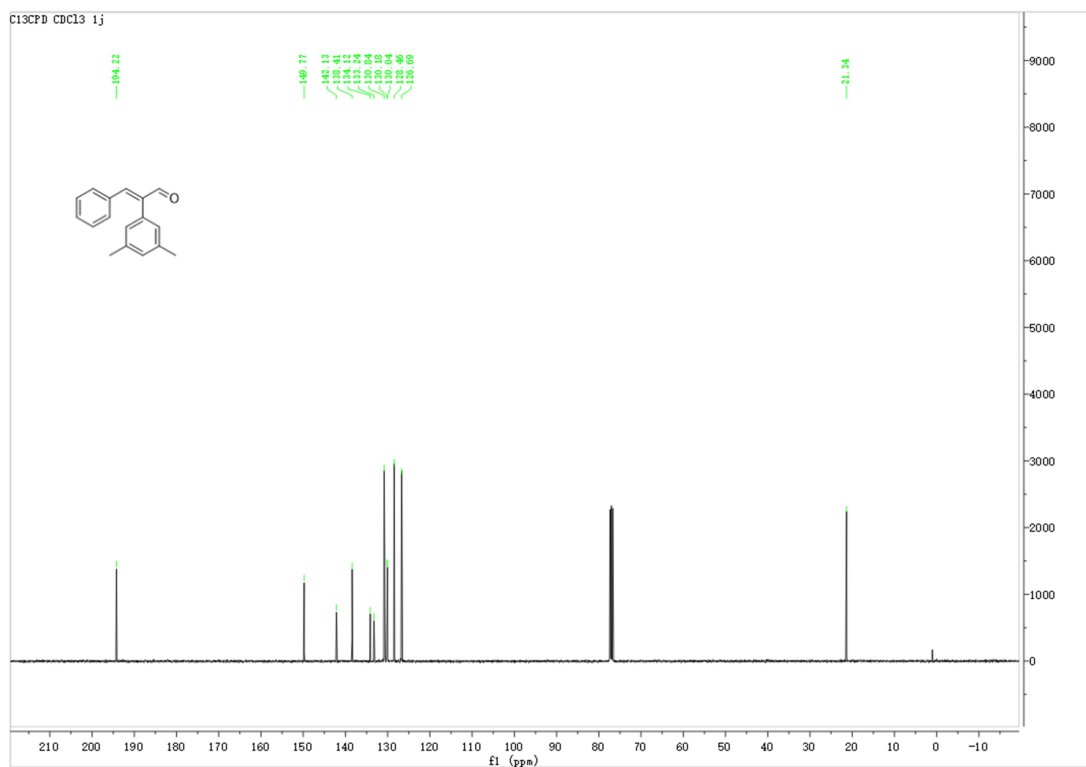

**Supplementary Figure 60.**  $^{13}\text{C}$  NMR spectrum of **1j** in  $\text{CDCl}_3$ .

00040 #16 RT: 0.21 AV: 1 NL: 2.54E 8  
T: FTM S + p ESI Full ms [100.00-1000.00]

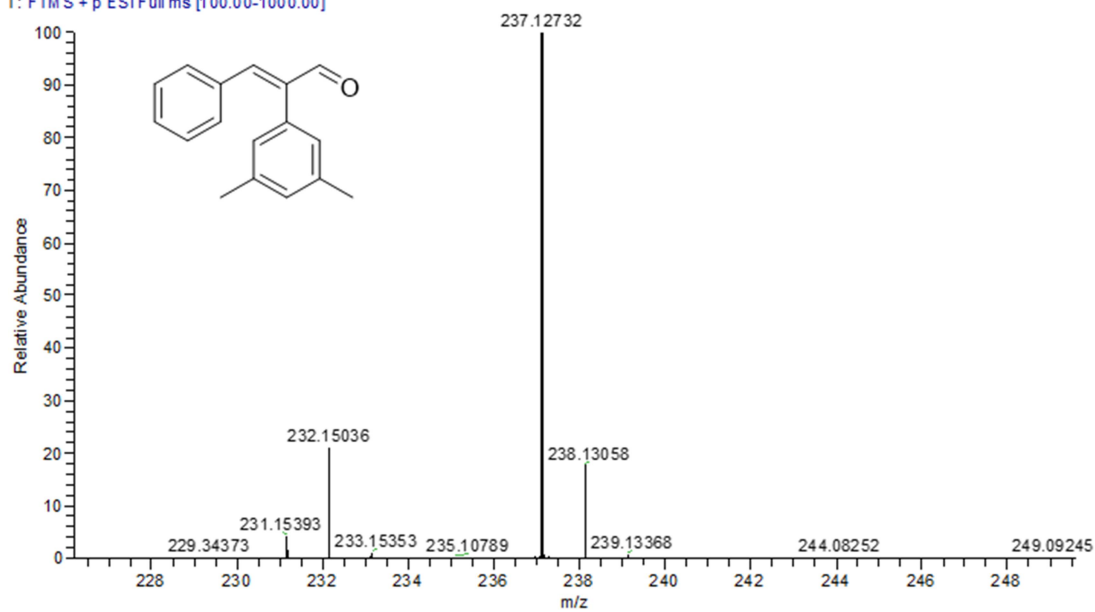

Supplementary Figure 61. HRMS of 1j.

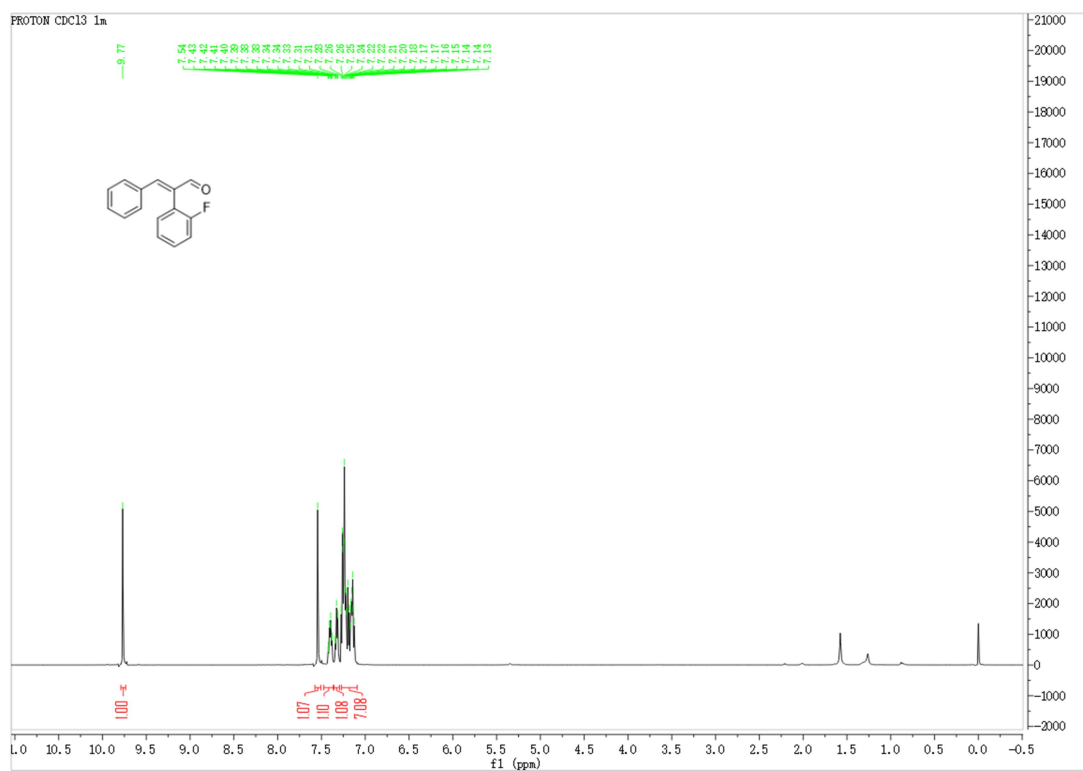

Supplementary Figure 62. <sup>1</sup>H NMR spectrum of 1m in CDCl<sub>3</sub>.



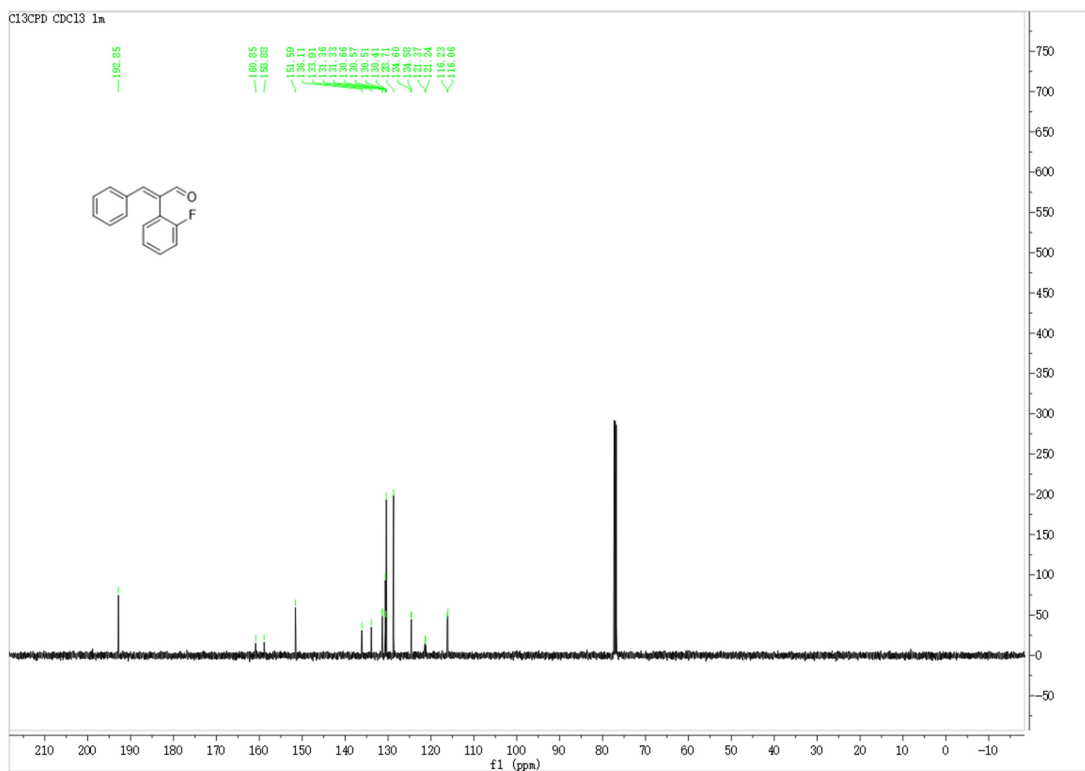

Supplementary Figure 63.  $^{13}\text{C}$  NMR spectrum of **1m** in  $\text{CDCl}_3$ .

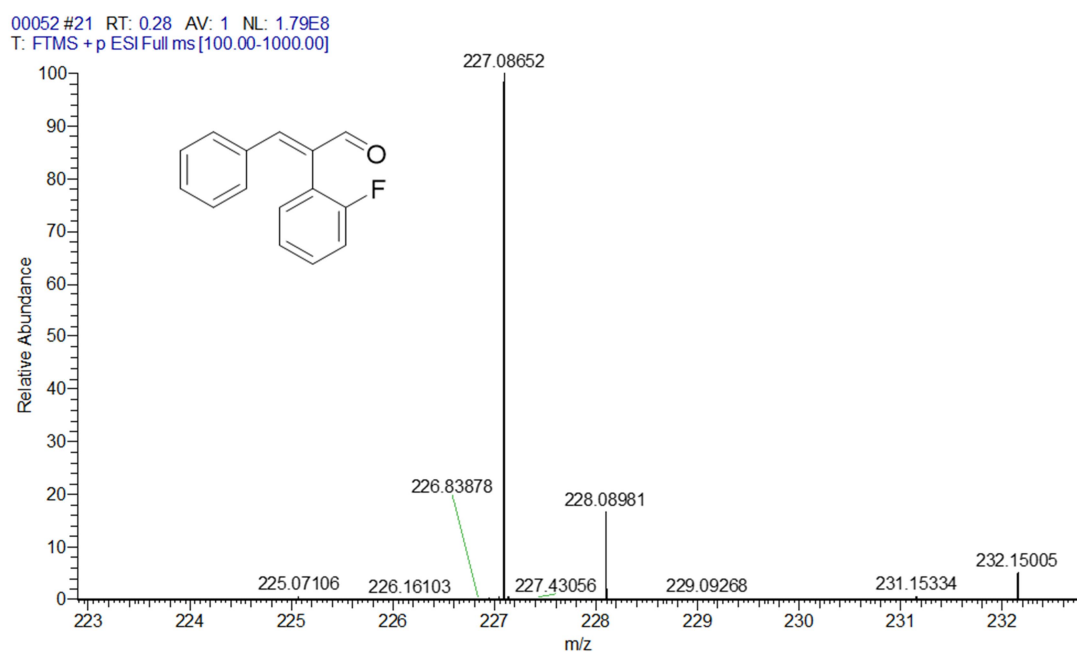

Supplementary Figure 64. HRMS of **1m**.

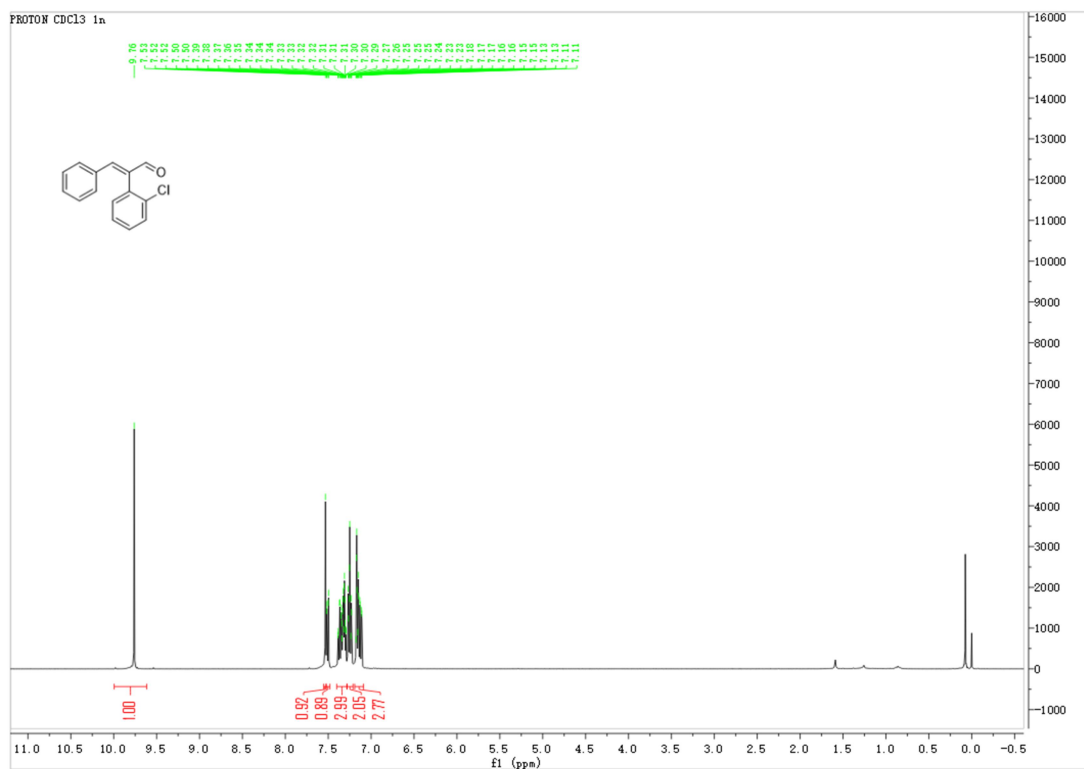

Supplementary Figure 65.  $^1\text{H}$  NMR spectrum of **1n** in  $\text{CDCl}_3$ .

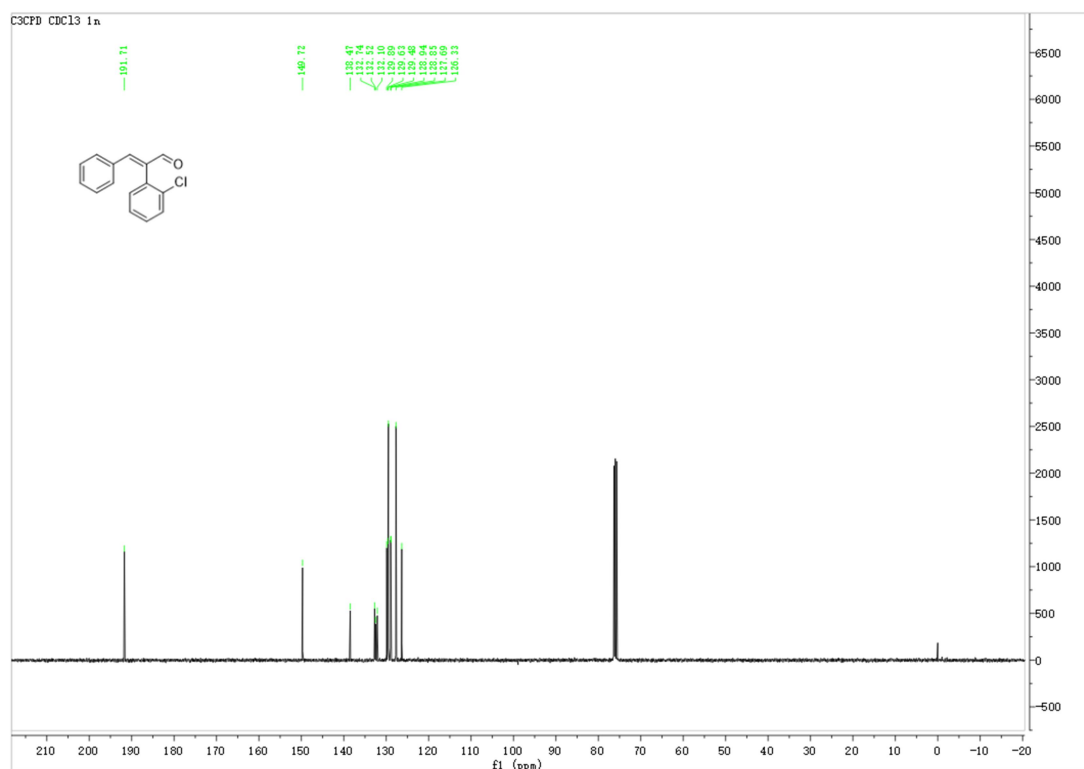

Supplementary Figure 66.  $^{13}\text{C}$  NMR spectrum of **1n** in  $\text{CDCl}_3$ .

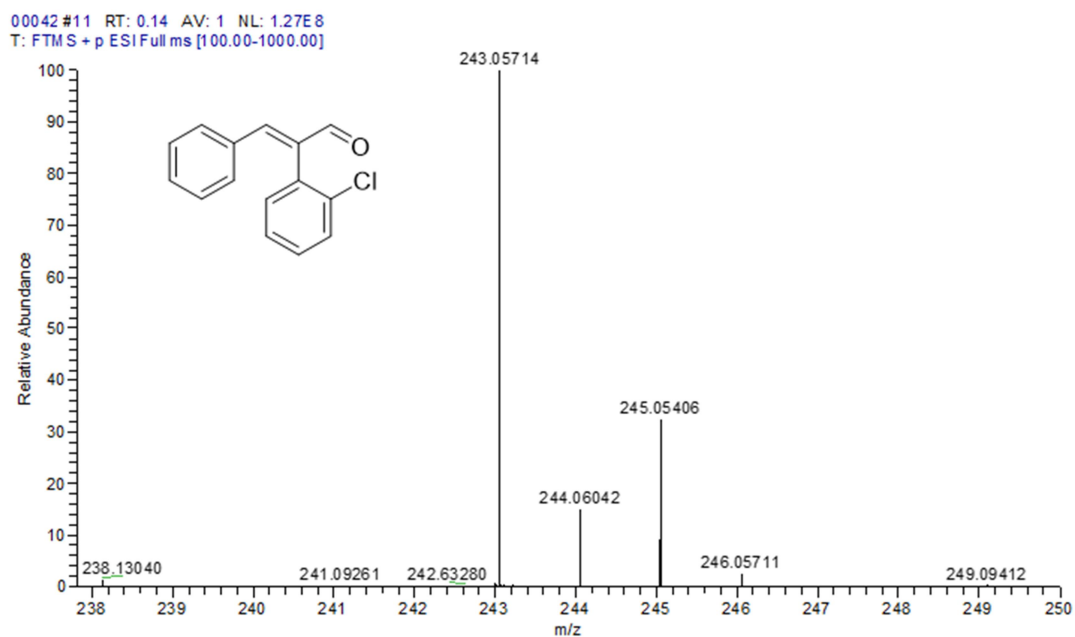

Supplementary Figure 67. HRMS of **1n**.

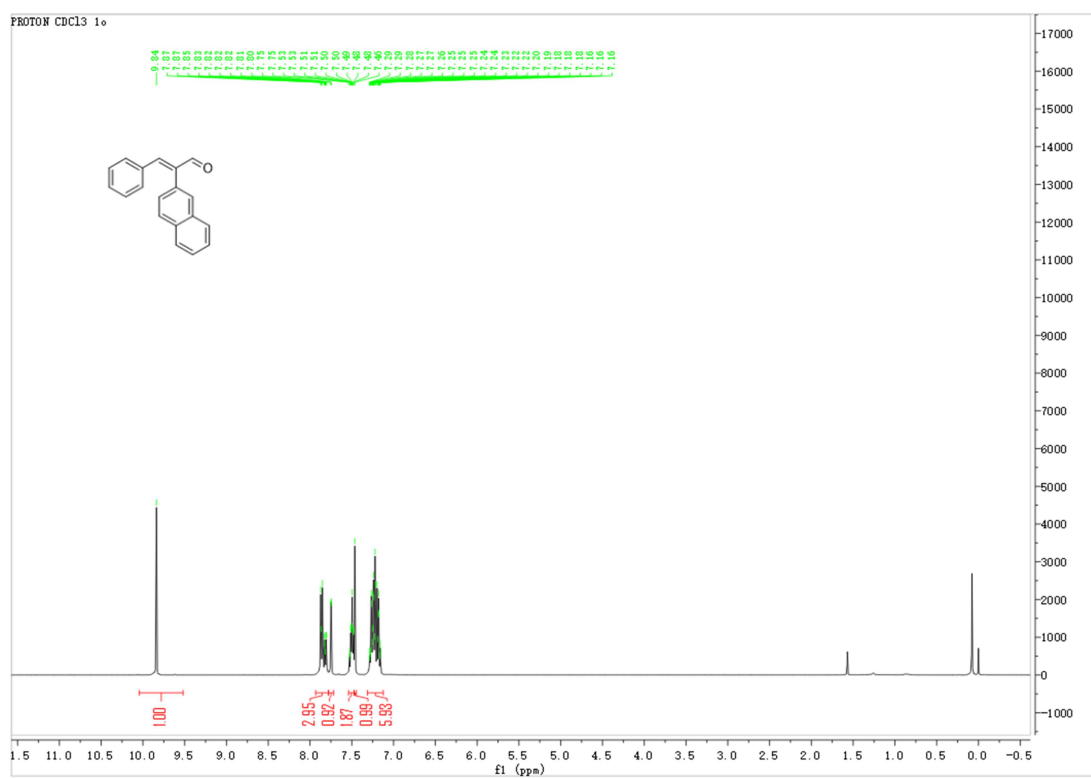

Supplementary Figure 68.  $^1\text{H}$  NMR spectrum of **1o** in  $\text{CDCl}_3$ .

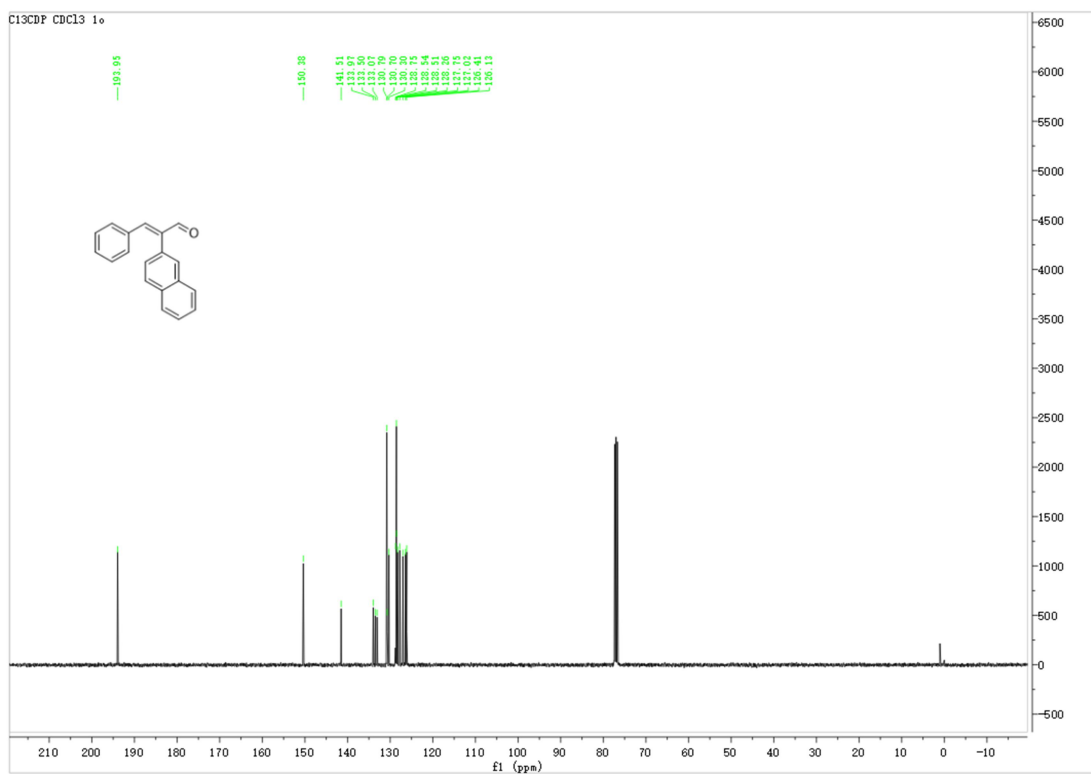

Supplementary Figure 69.  $^{13}\text{C}$  NMR spectrum of **1o** in  $\text{CDCl}_3$ .

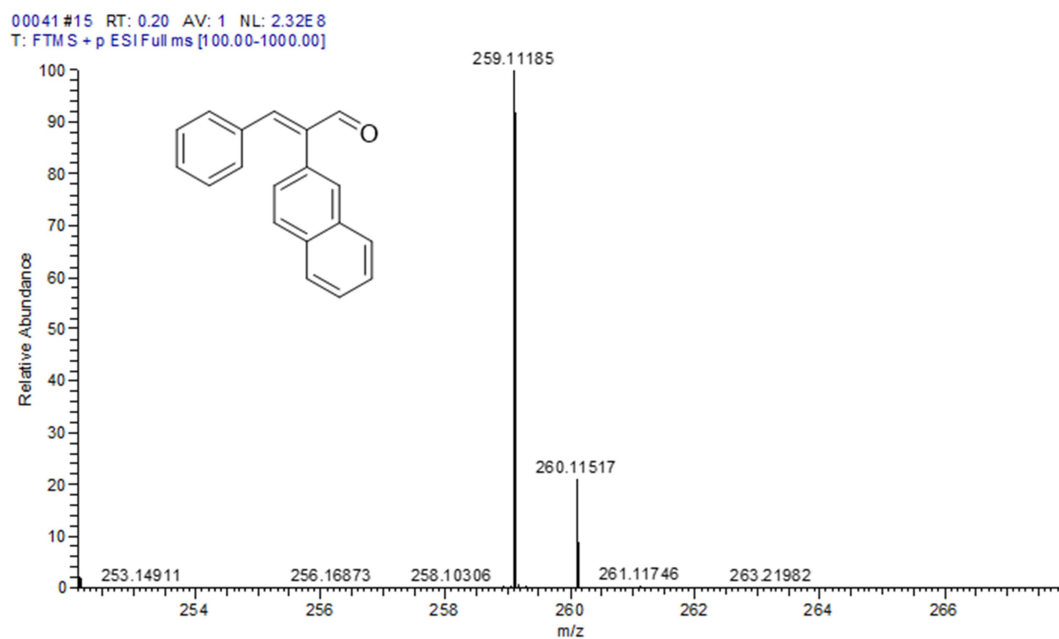

Supplementary Figure 70. HRMS of **1o**.

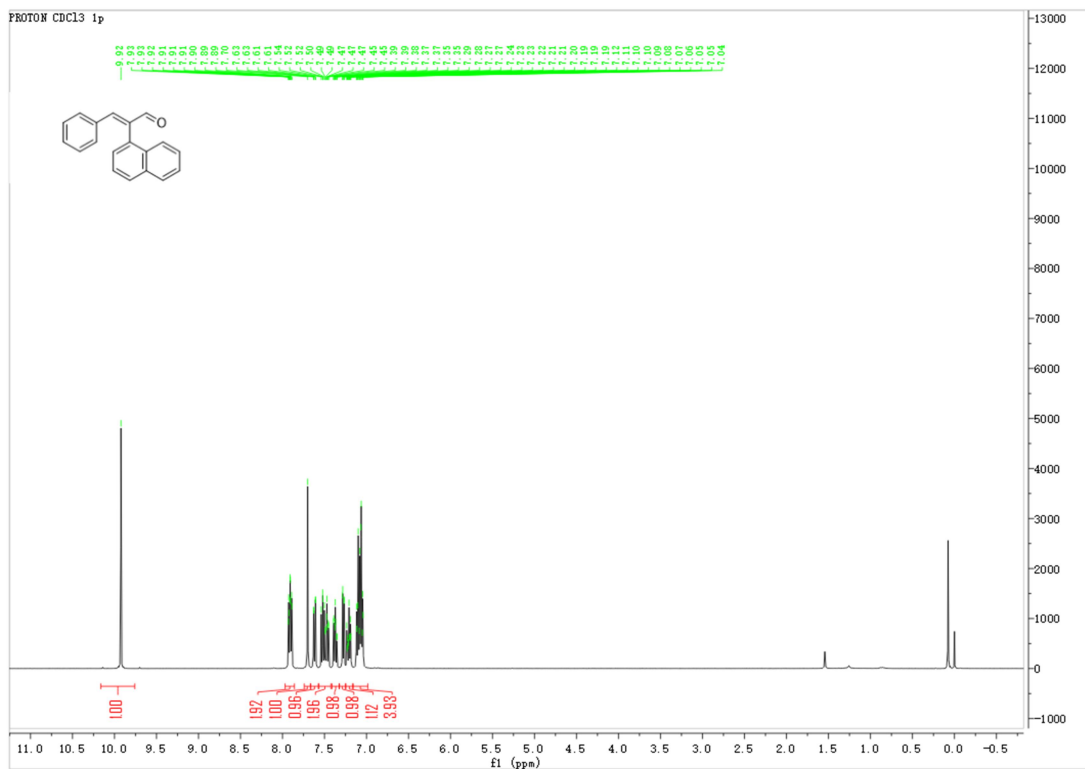

Supplementary Figure 71.  $^1\text{H}$  NMR spectrum of **1p** in  $\text{CDCl}_3$ .

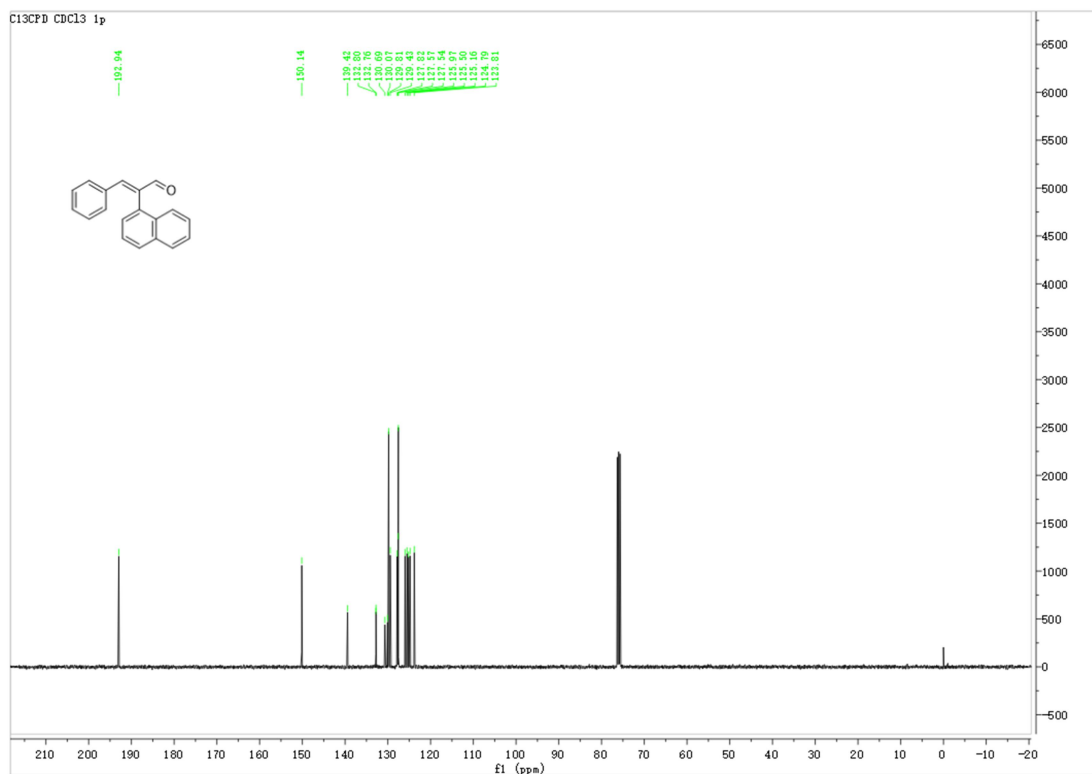

Supplementary Figure 72.  $^{13}\text{C}$  NMR spectrum of **1p** in  $\text{CDCl}_3$ .

00045 #13 RT: 0.17 AV: 1 NL: 2.09E8  
T: FTMS + p ESI Full ms [100.00-1000.00]

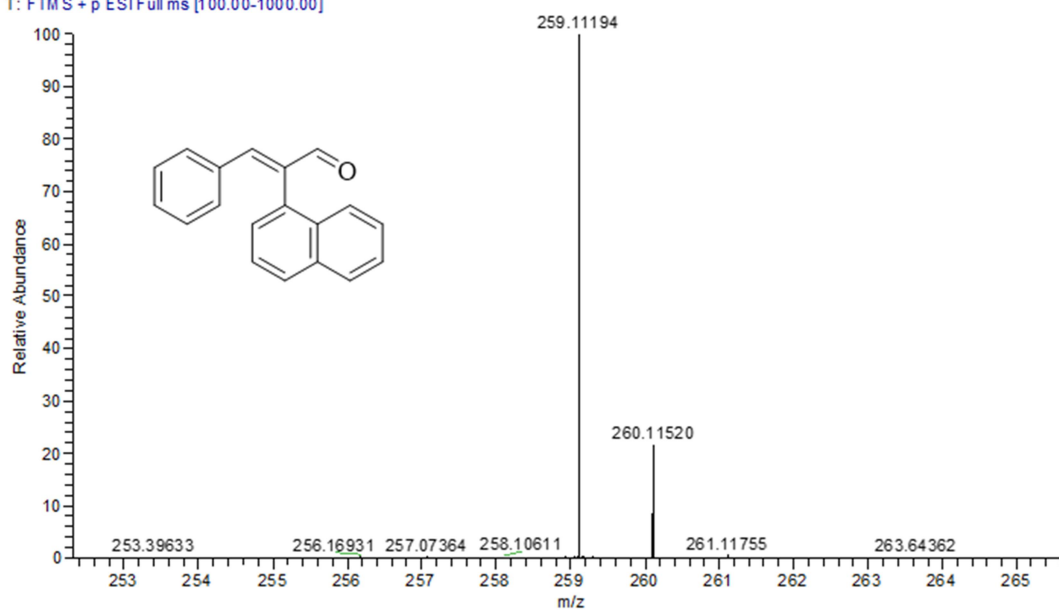

Supplementary Figure 73. HRMS of 1p.

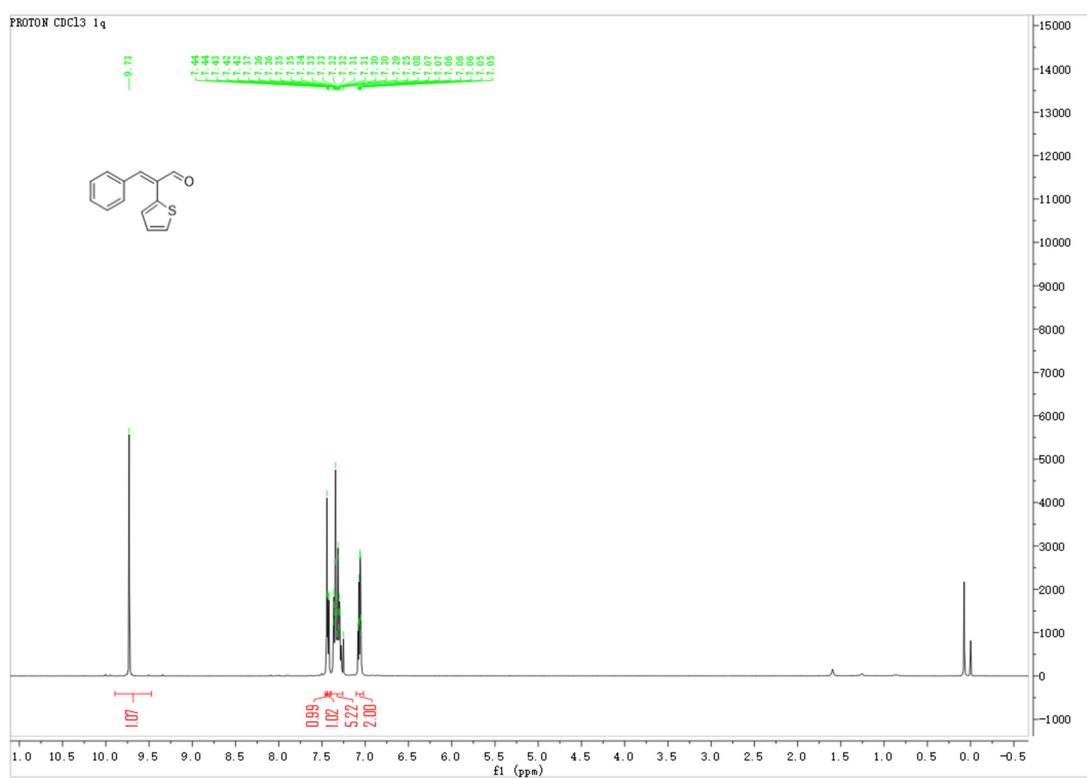

Supplementary Figure 74. <sup>1</sup>H NMR spectrum of 1q in CDCl<sub>3</sub>.

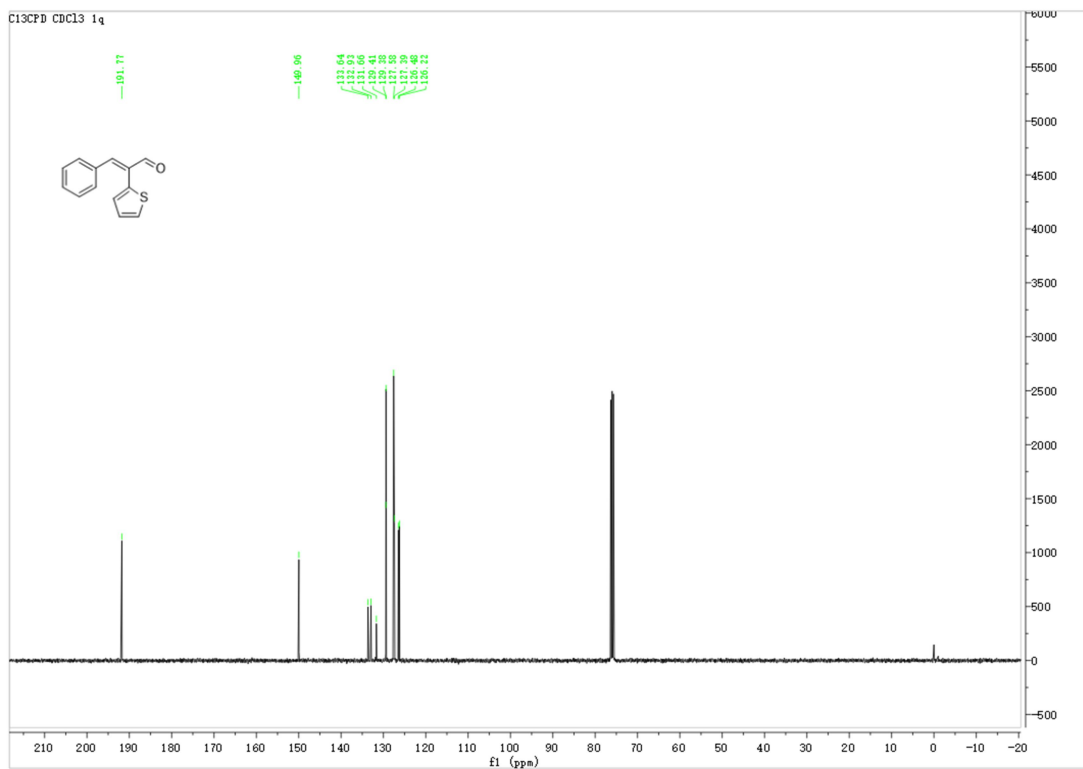

Supplementary Figure 75.  $^{13}\text{C}$  NMR spectrum of **1q** in  $\text{CDCl}_3$ .

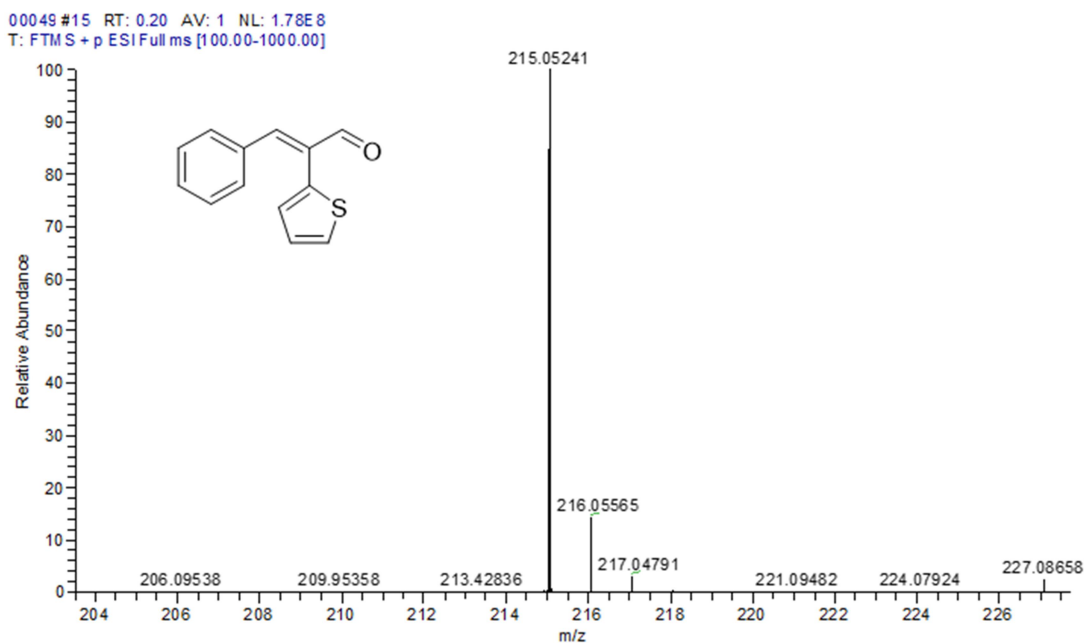

Supplementary Figure 76. HRMS of **1q**.

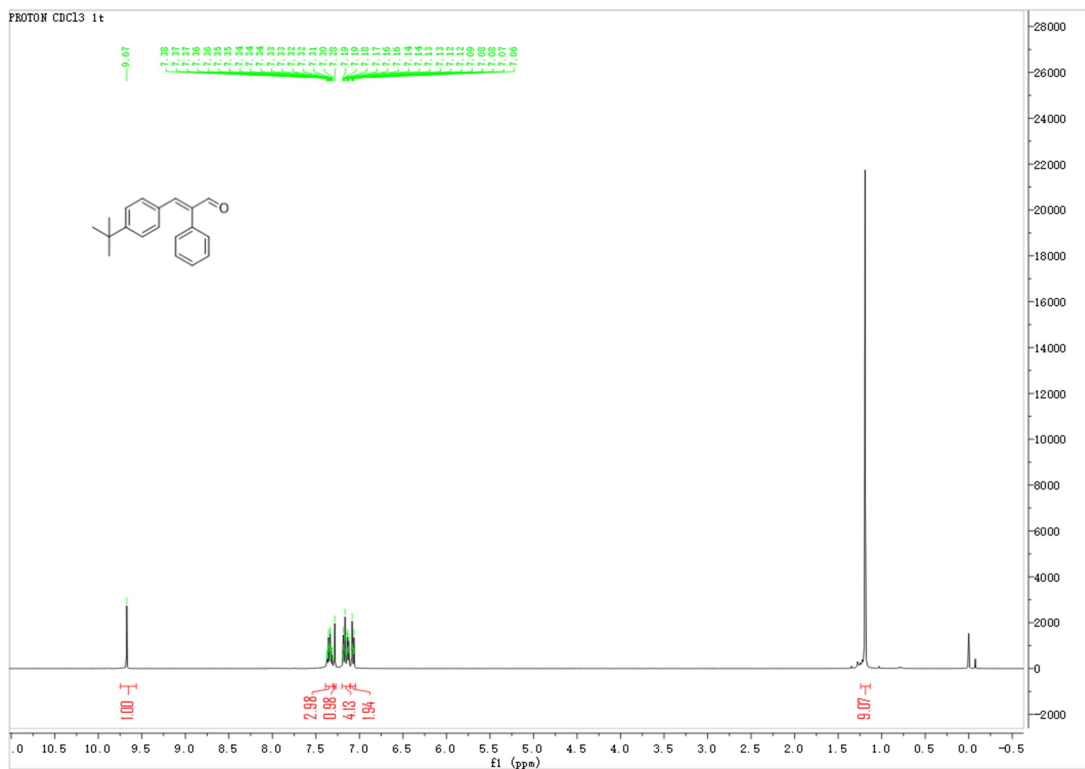

Supplementary Figure 77.  $^1\text{H}$  NMR spectrum of **1t** in  $\text{CDCl}_3$ .

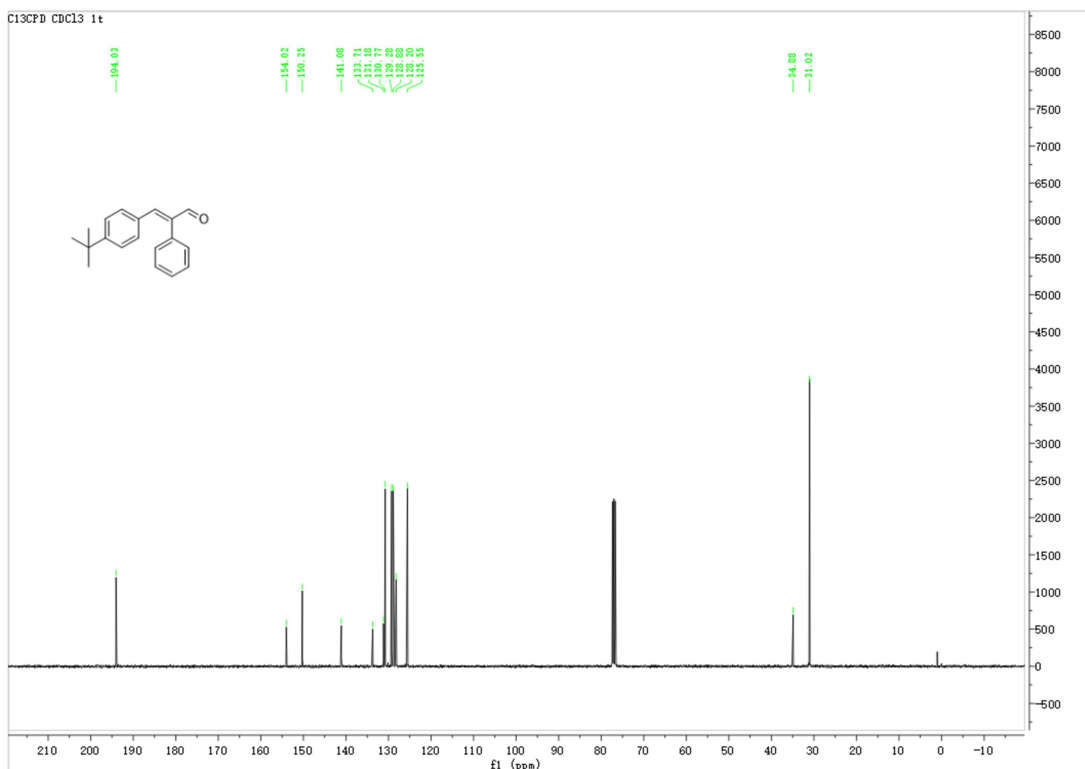

Supplementary Figure 78.  $^{13}\text{C}$  NMR spectrum of **1t** in  $\text{CDCl}_3$ .



00050 #17 RT: 0.22 AV: 1 NL: 2.03E 8  
T: FTM S + p ESI Full ms [100.00-1000.00]

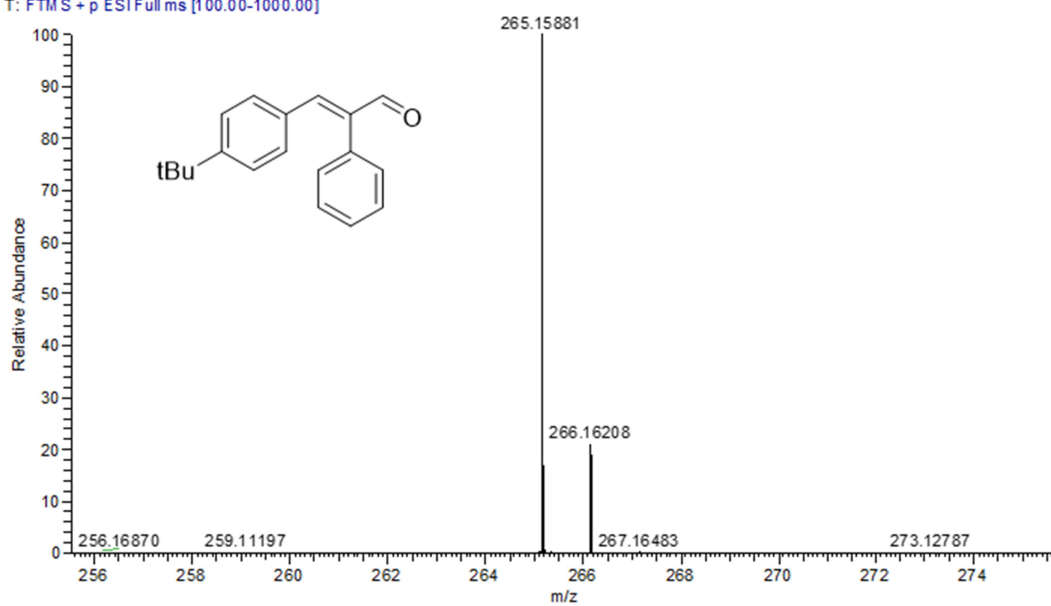

Supplementary Figure 79. HRMS of 1t.

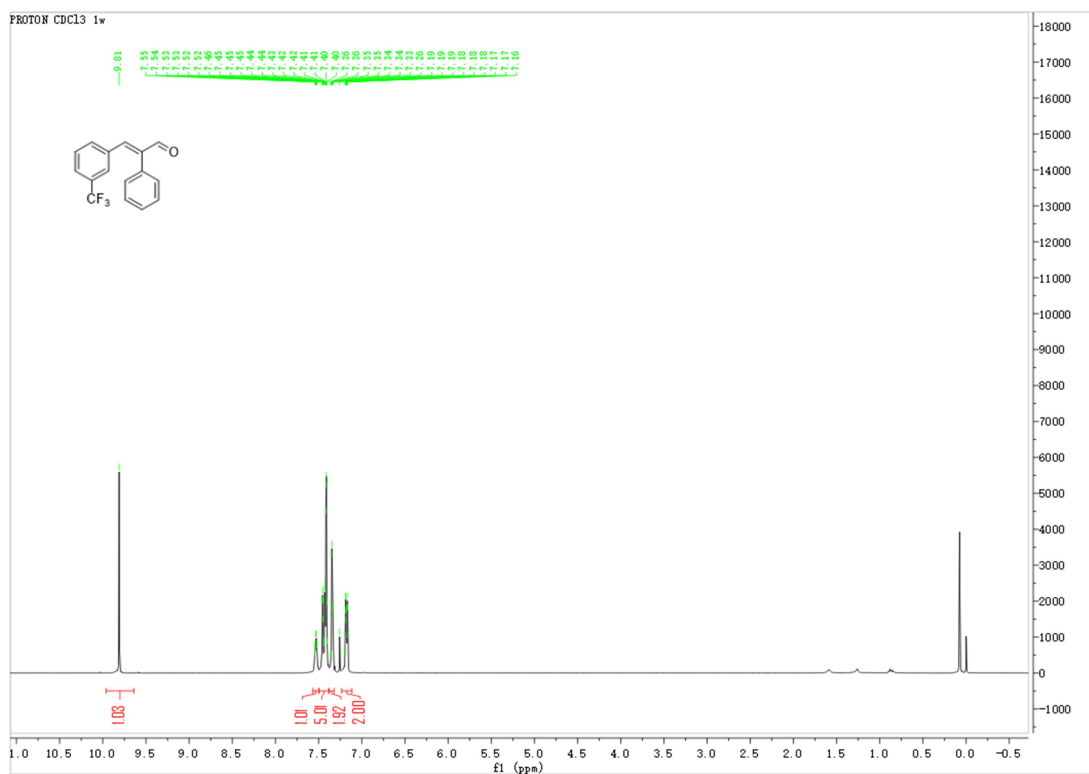

Supplementary Figure 80.  $^1\text{H}$  NMR spectrum of 1w in  $\text{CDCl}_3$ .

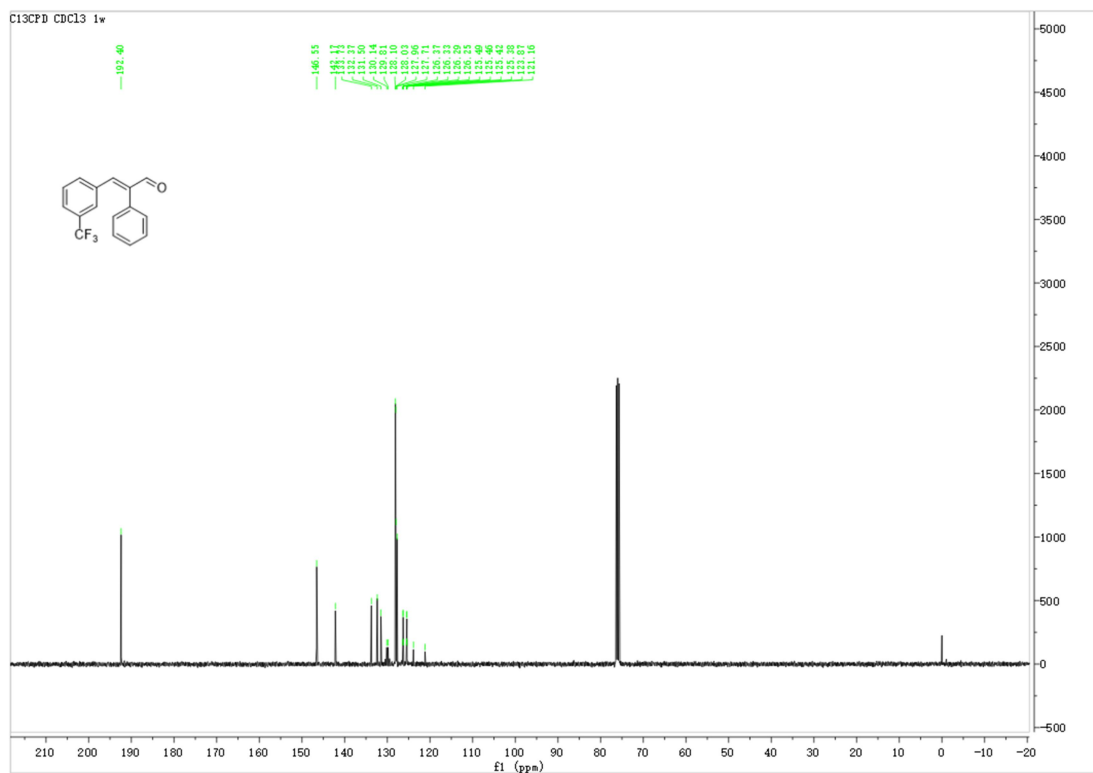

Supplementary Figure 81.  $^{13}\text{C}$  NMR spectrum of **1w** in  $\text{CDCl}_3$ .

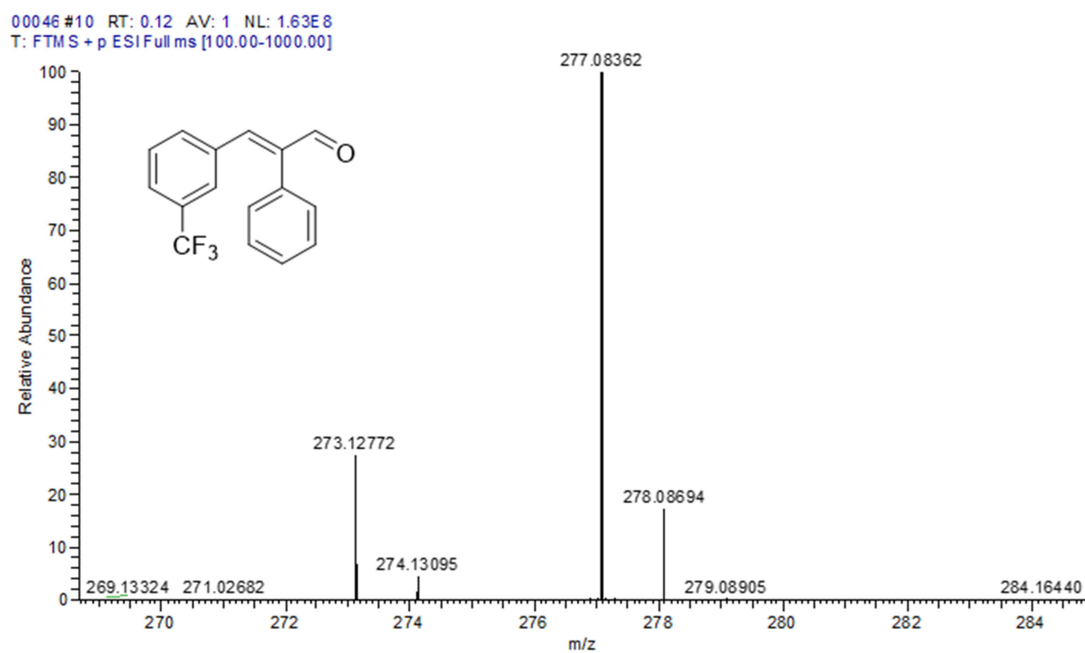

Supplementary Figure 82. HRMS of **1w**.

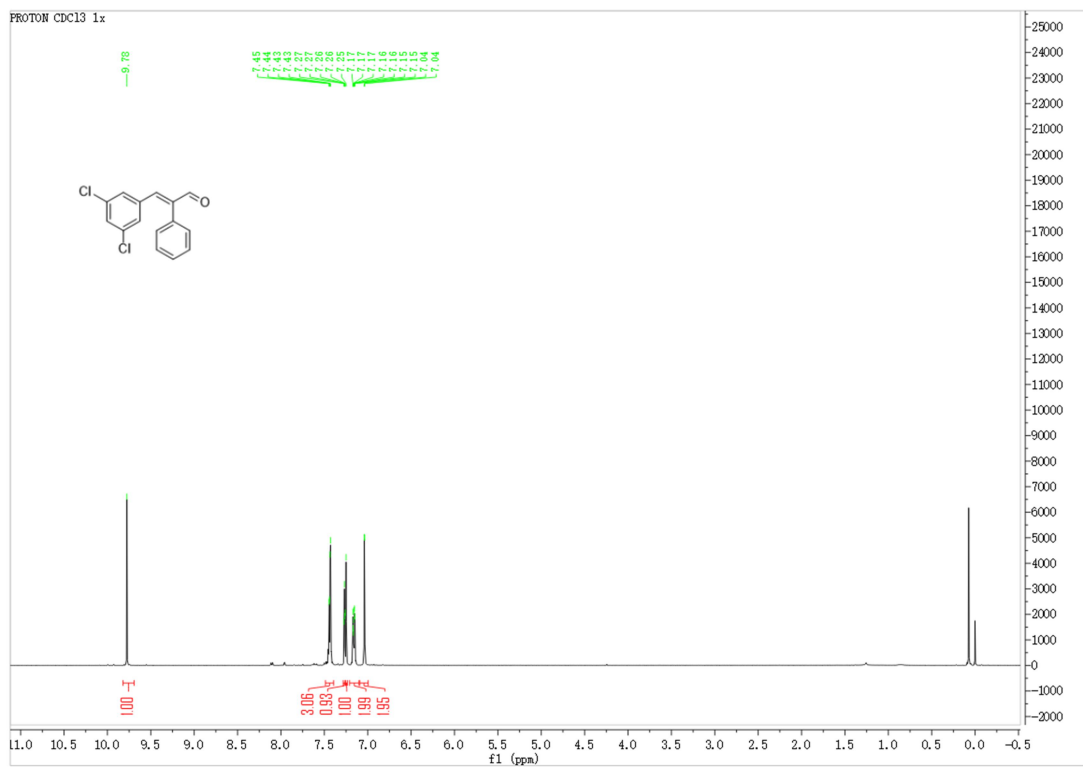

Supplementary Figure 83.  $^1\text{H}$  NMR spectrum of 1x in  $\text{CDCl}_3$ .

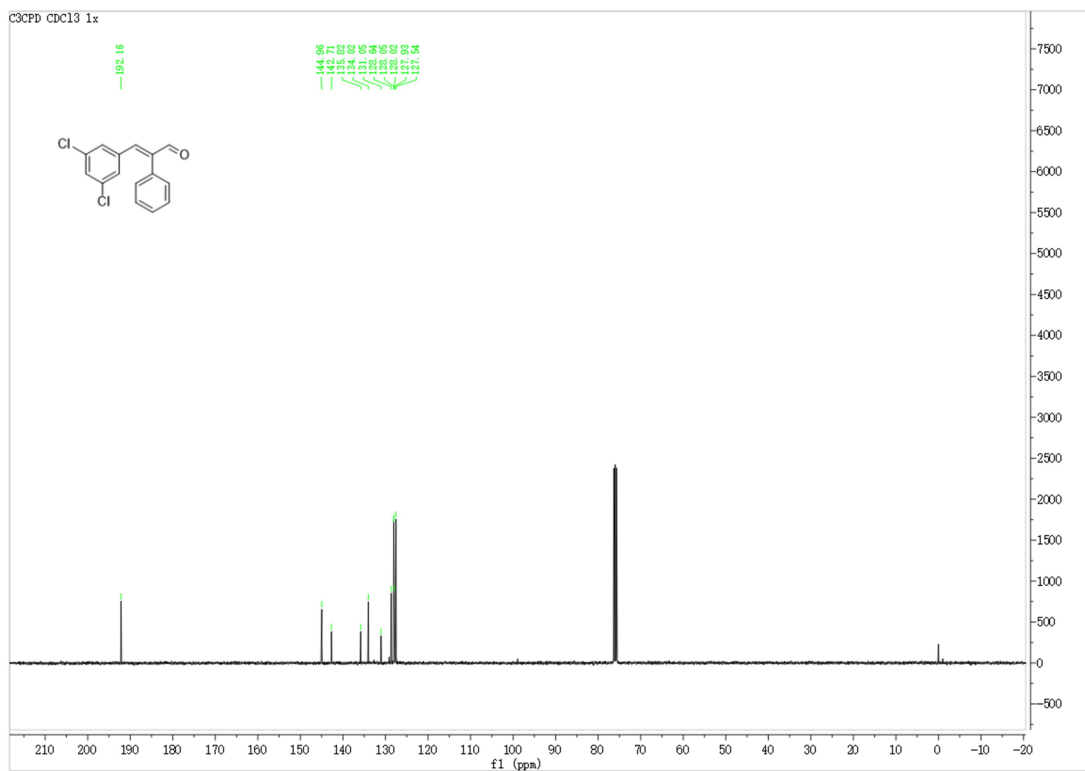

Supplementary Figure 84.  $^{13}\text{C}$  NMR spectrum of 1x in  $\text{CDCl}_3$ .

00039 #11 RT: 0.14 AV: 1 NL: 7.02E7  
T: FTMS + p ESI Full ms [100.00-1000.00]

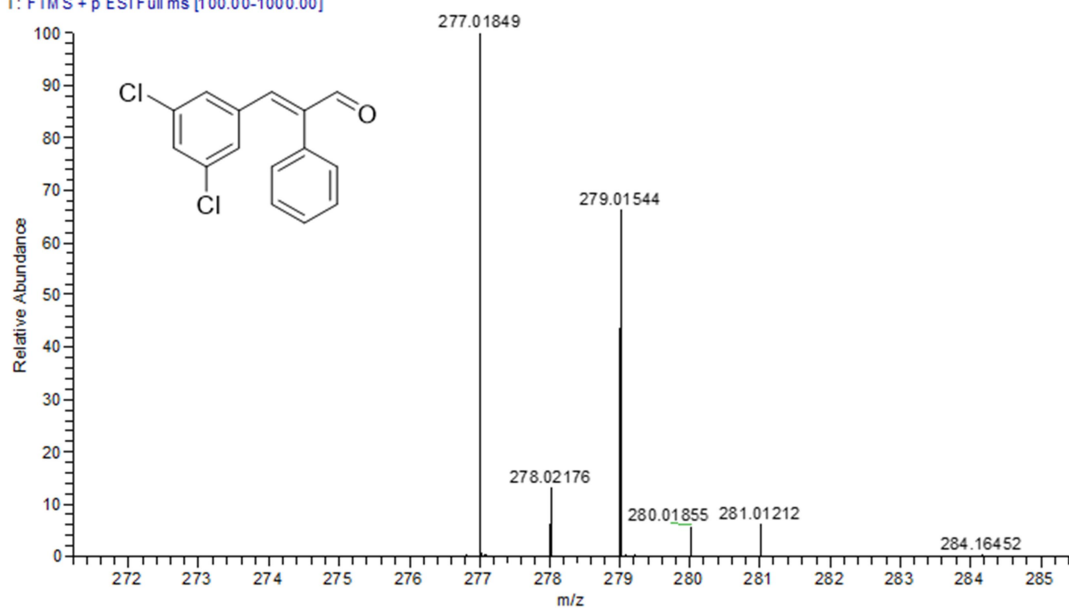

Supplementary Figure 85. HRMS of 1x.

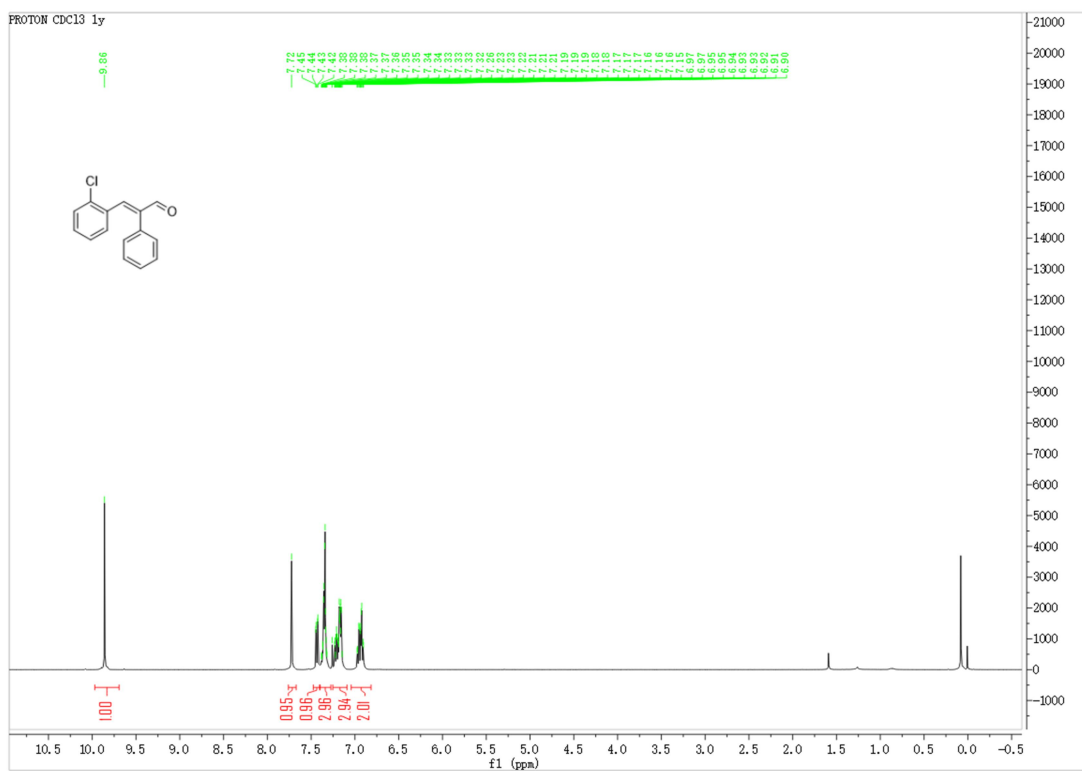

Supplementary Figure 86. <sup>1</sup>H NMR spectrum of 1x in CDCl<sub>3</sub>.

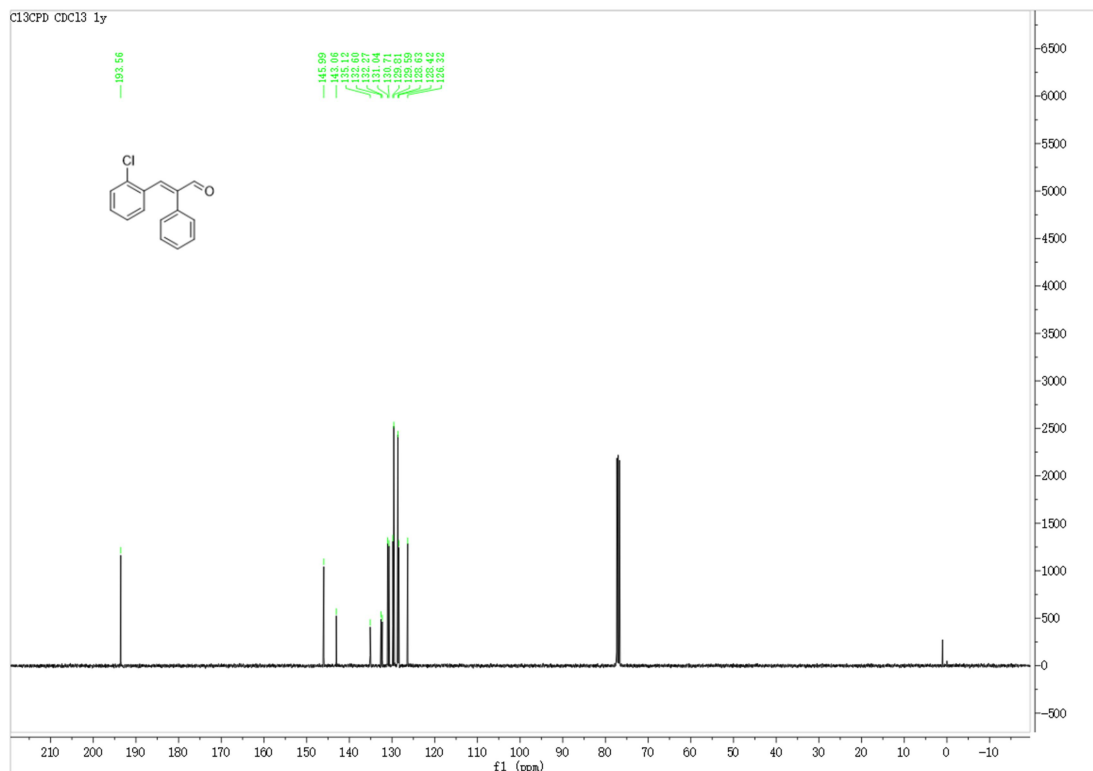

Supplementary Figure 87.  $^{13}\text{C}$  NMR spectrum of **1y** in  $\text{CDCl}_3$ .

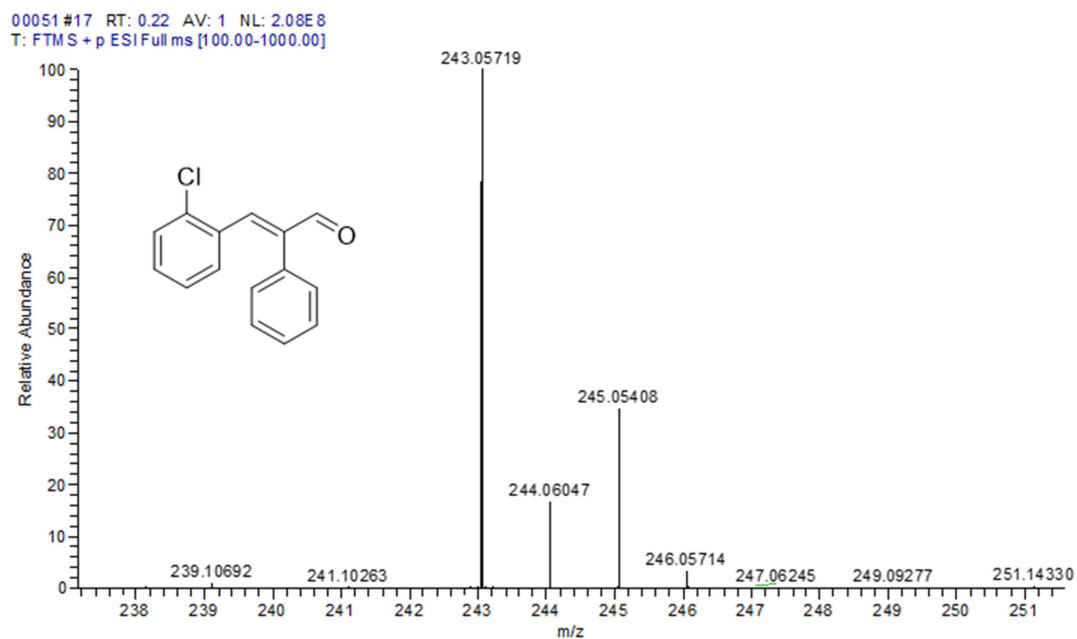

Supplementary Figure 88. HRMS of **1y**.

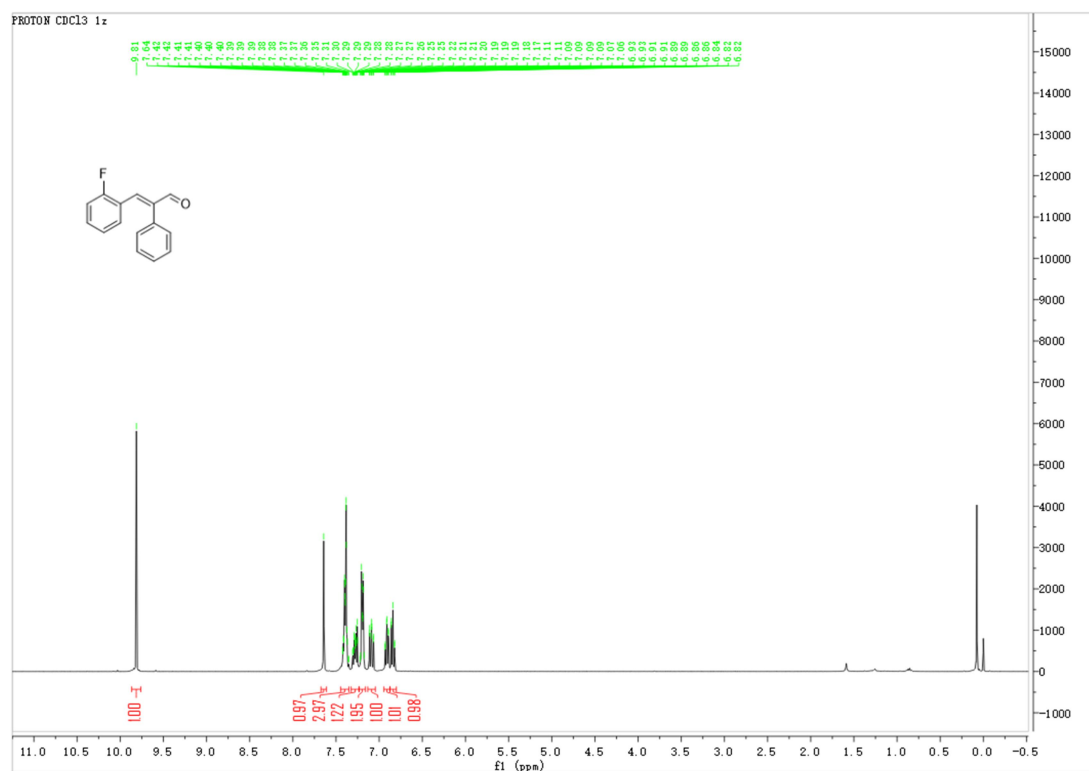

Supplementary Figure 89.  $^1\text{H}$  NMR spectrum of **1z** in  $\text{CDCl}_3$ .

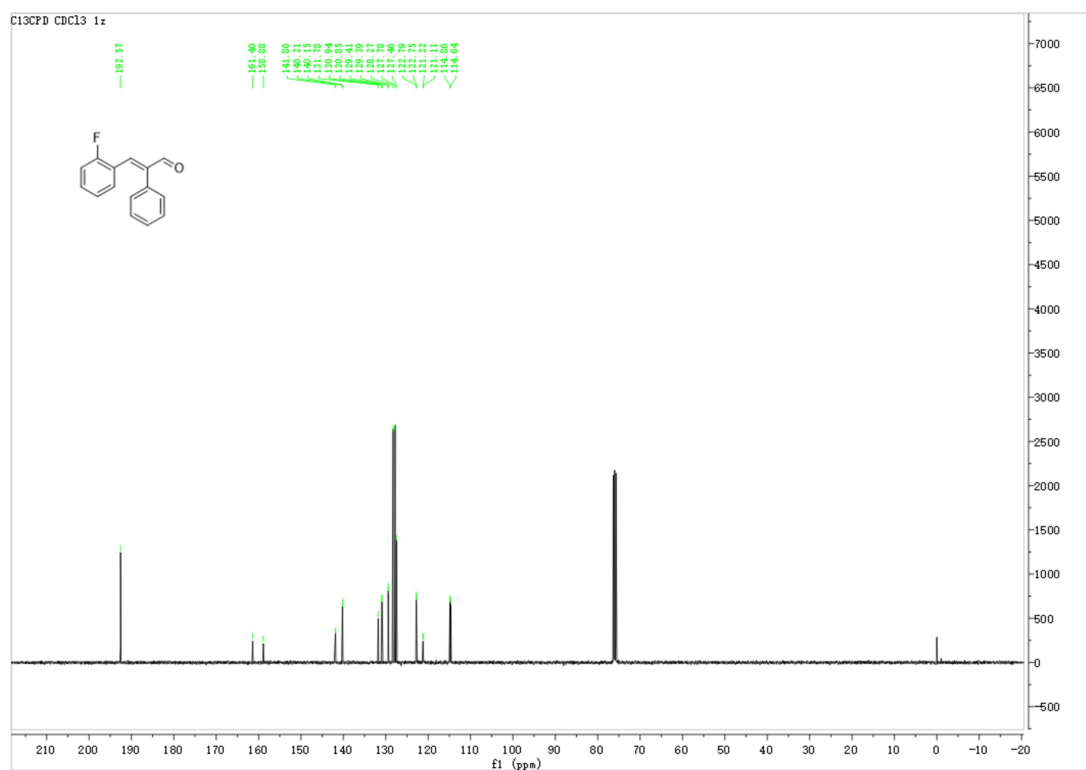

Supplementary Figure 90.  $^{13}\text{C}$  NMR spectrum of **1z** in  $\text{CDCl}_3$ .

00043 #15 RT: 0.20 AV: 1 NL: 2.02E8  
T: FTMS + p ESI Full ms [100.00-1000.00]

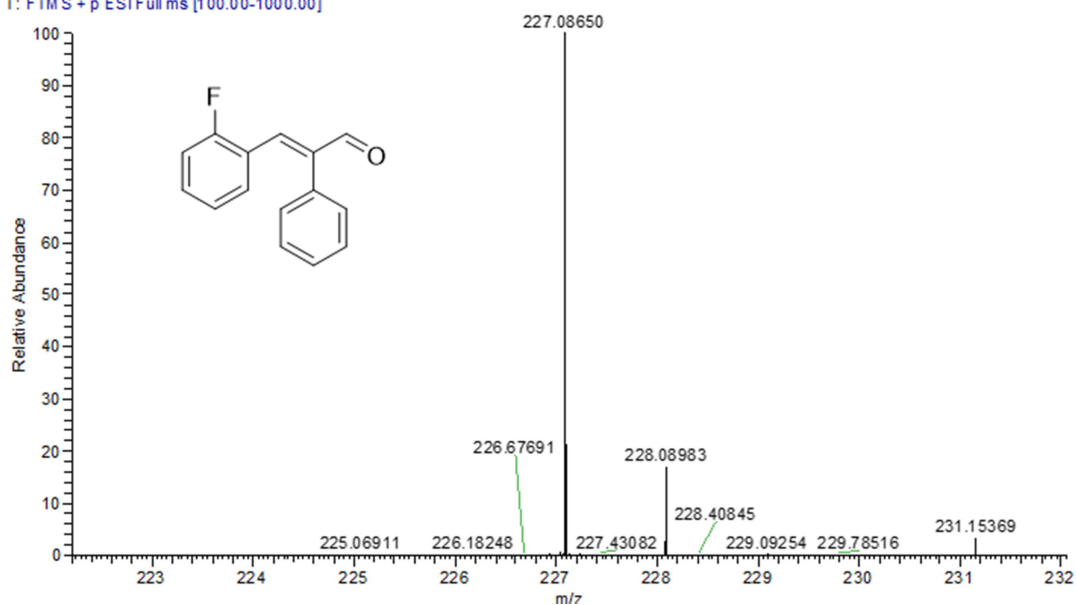

Supplementary Figure 91. HRMS of 1z.

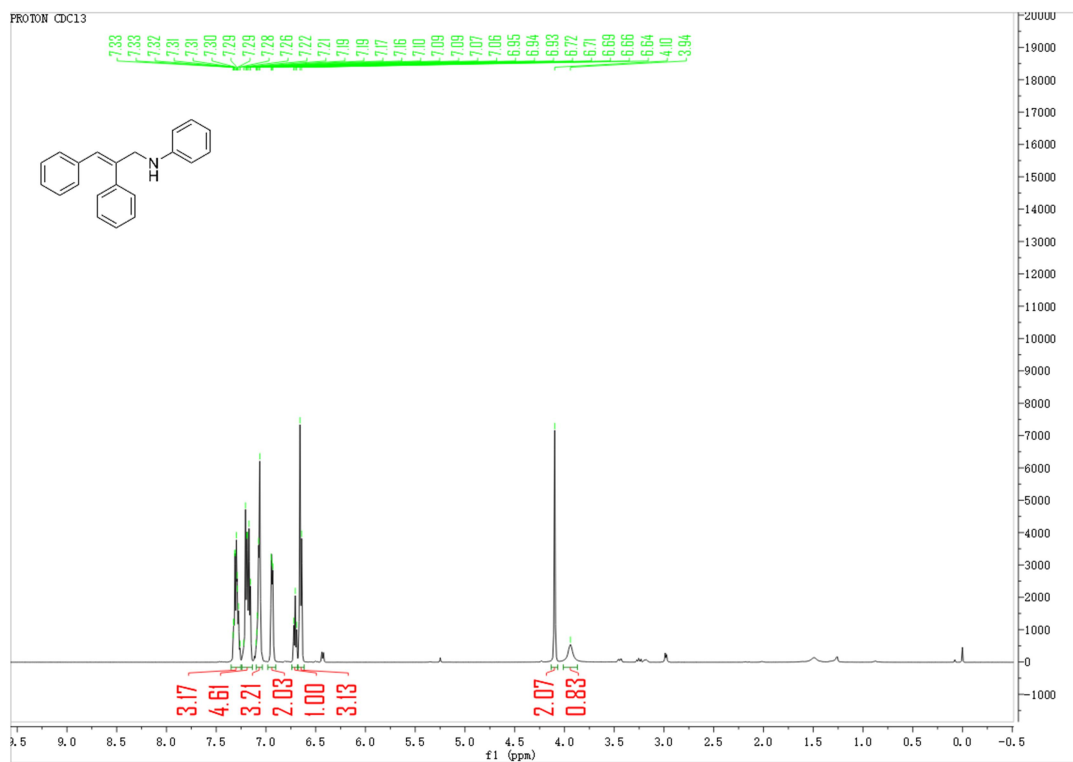

Supplementary Figure 92. <sup>1</sup>H NMR spectrum of 4 in CDCl<sub>3</sub>.

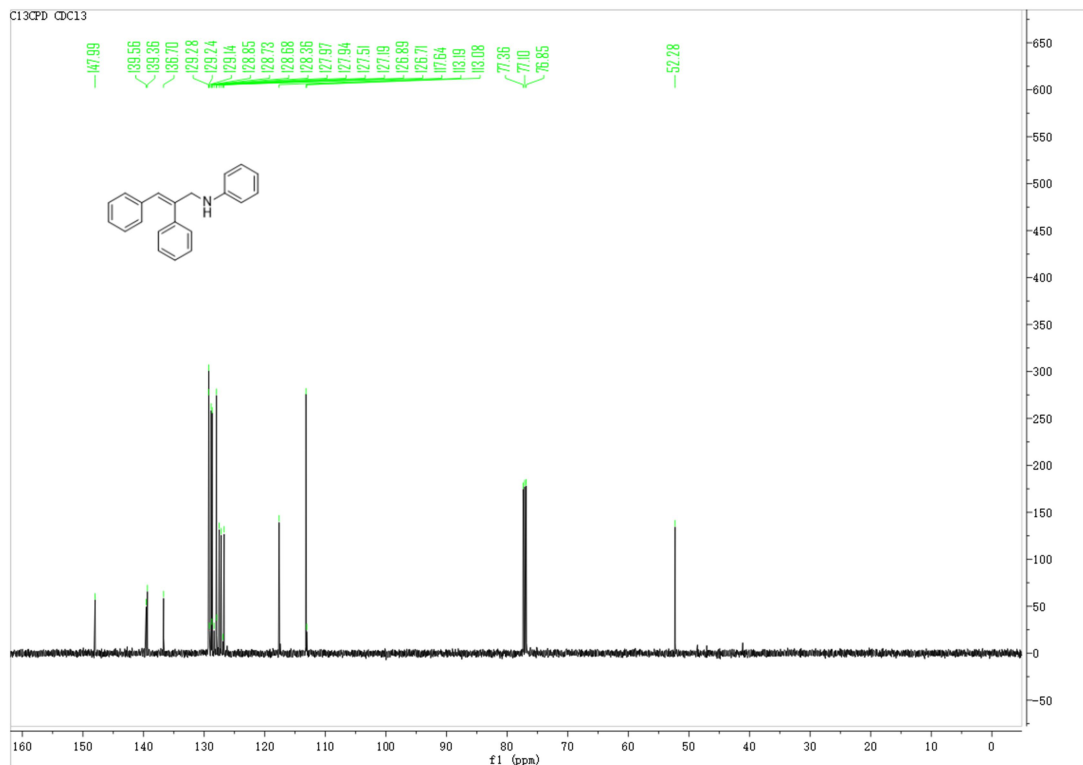

Supplementary Figure 93.  $^{13}\text{C}$  NMR spectrum of 4 in  $\text{CDCl}_3$ .

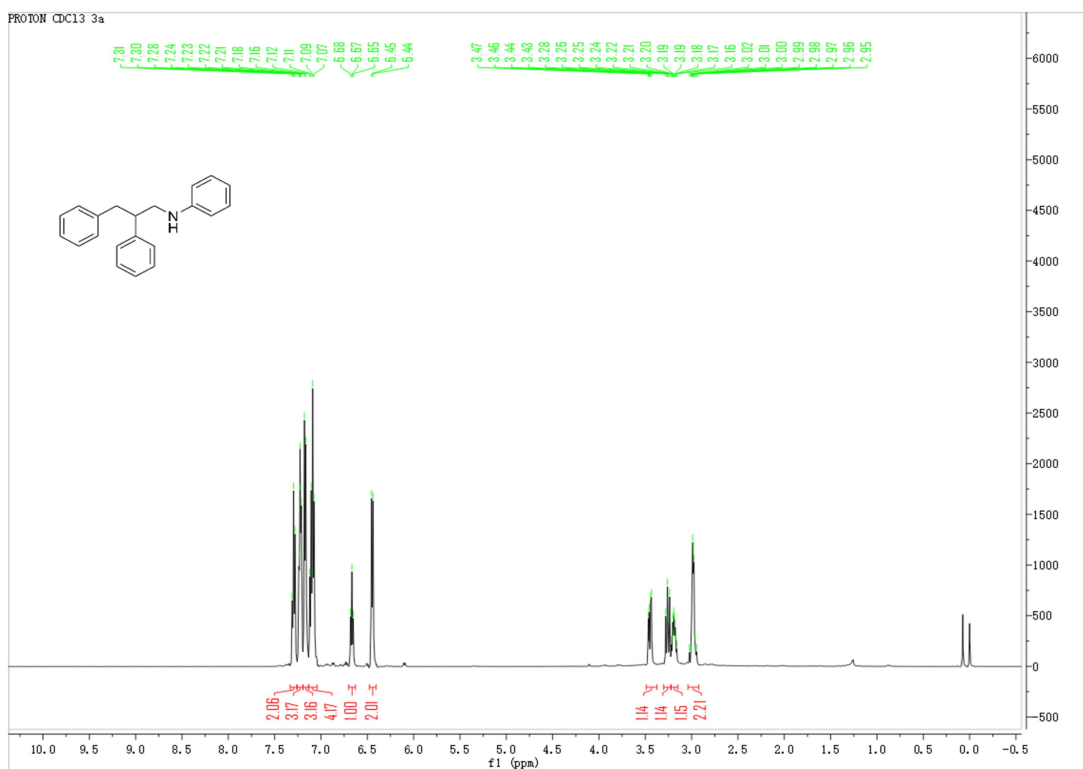

Supplementary Figure 94.  $^1\text{H}$  NMR spectrum of 3a in  $\text{CDCl}_3$ .



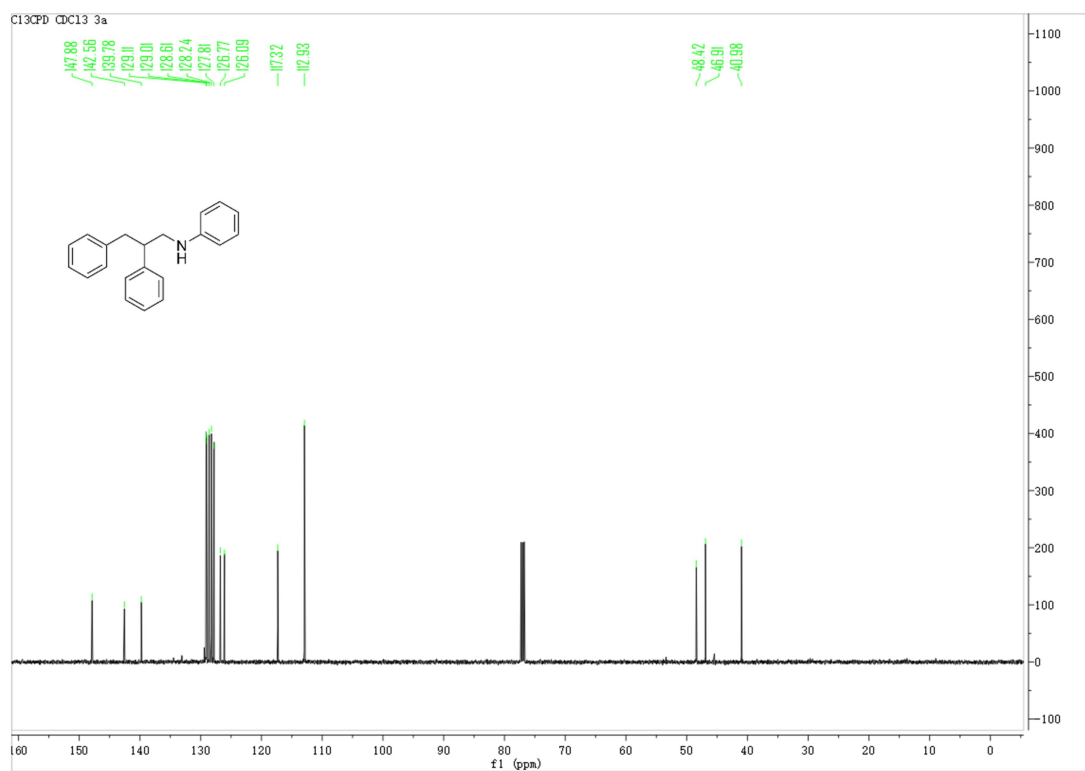

Supplementary Figure 95.  $^{13}\text{C}$  NMR spectrum of **3a** in  $\text{CDCl}_3$ .

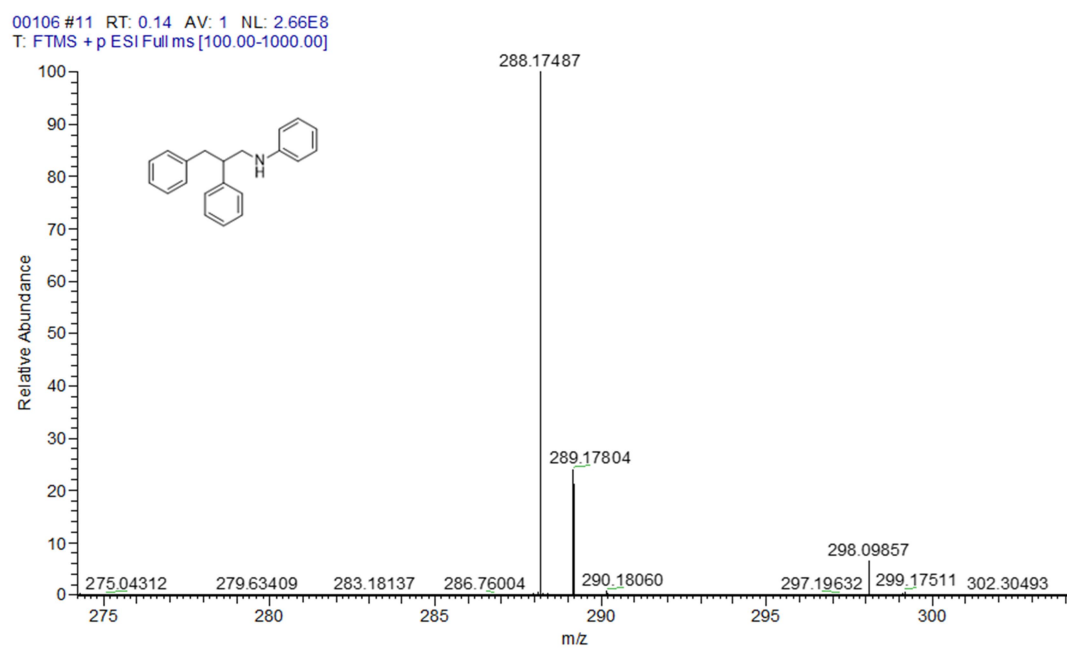

Supplementary Figure 96. HRMS of **3a**.

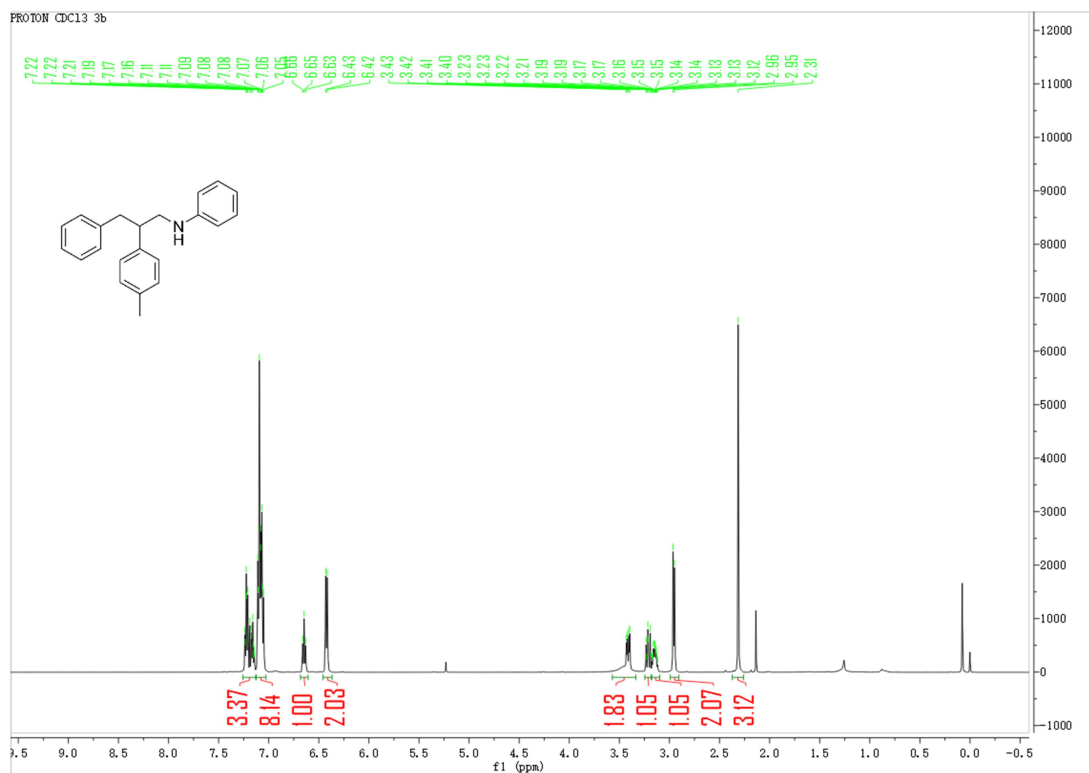

Supplementary Figure 97.  $^1\text{H}$  NMR spectrum of **3b** in  $\text{CDCl}_3$ .

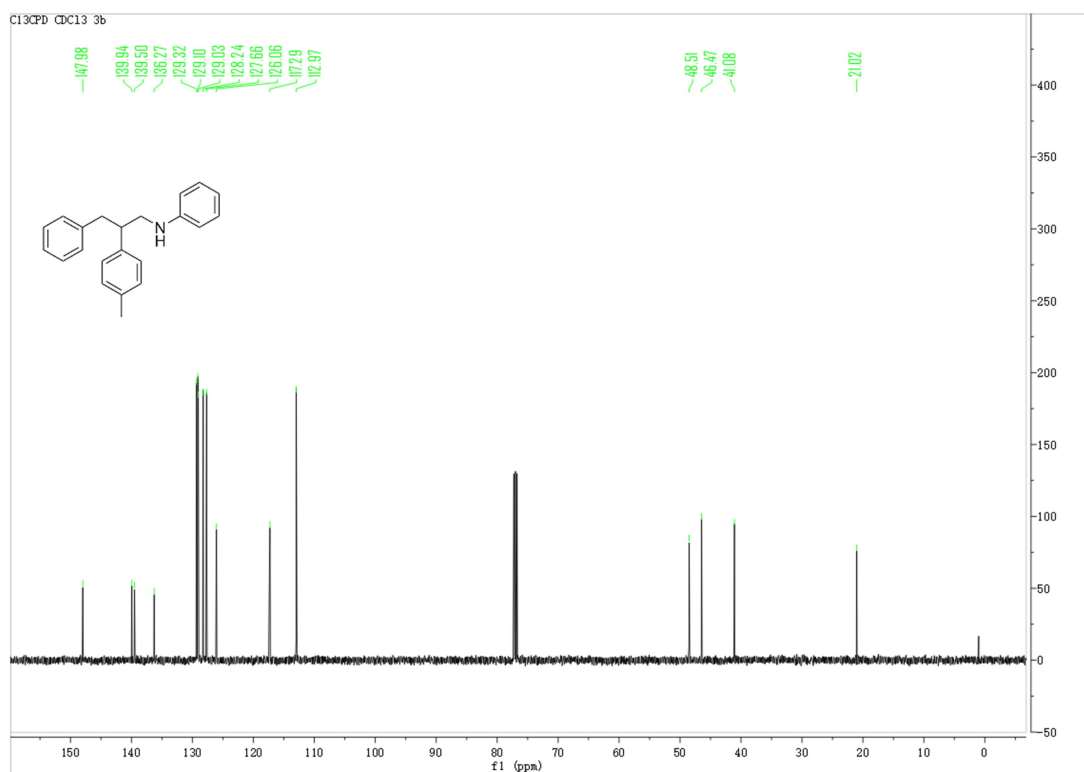

Supplementary Figure 98.  $^{13}\text{C}$  NMR spectrum of **3b** in  $\text{CDCl}_3$ .

00110 #18 RT: 0.24 AV: 1 NL: 3.61E8  
T: FTMS + p ESI Full ms [100.00-1000.00]

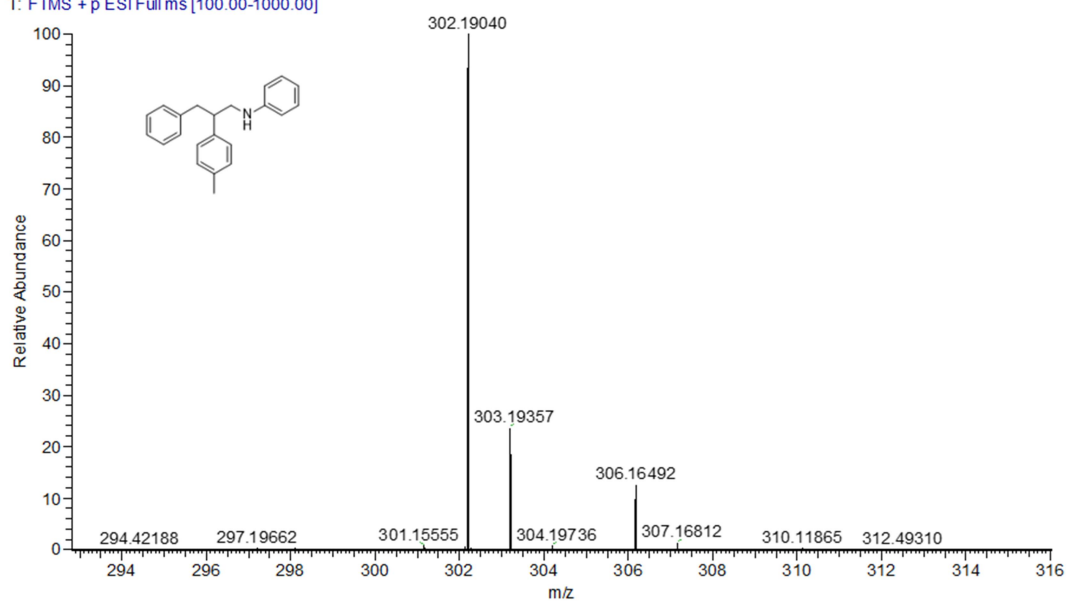

Supplementary Figure 99. HRMS of 3d.

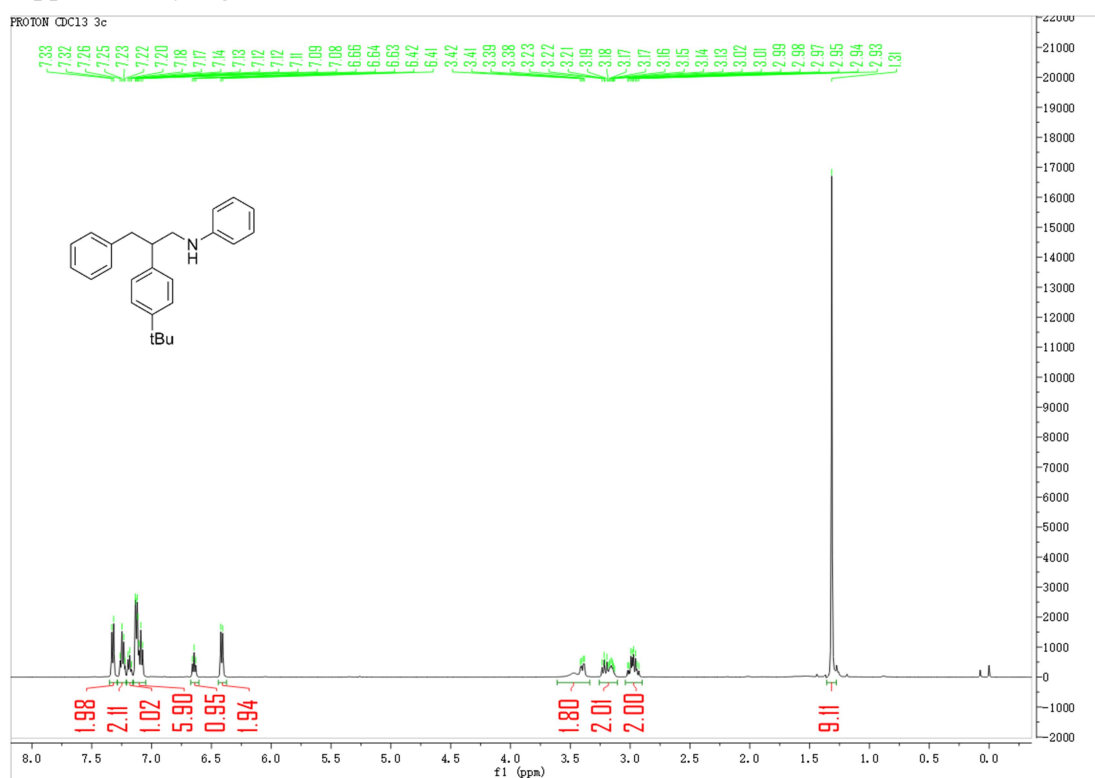

Supplementary Figure 100.  $^1\text{H}$  NMR spectrum of 3c in  $\text{CDCl}_3$ .

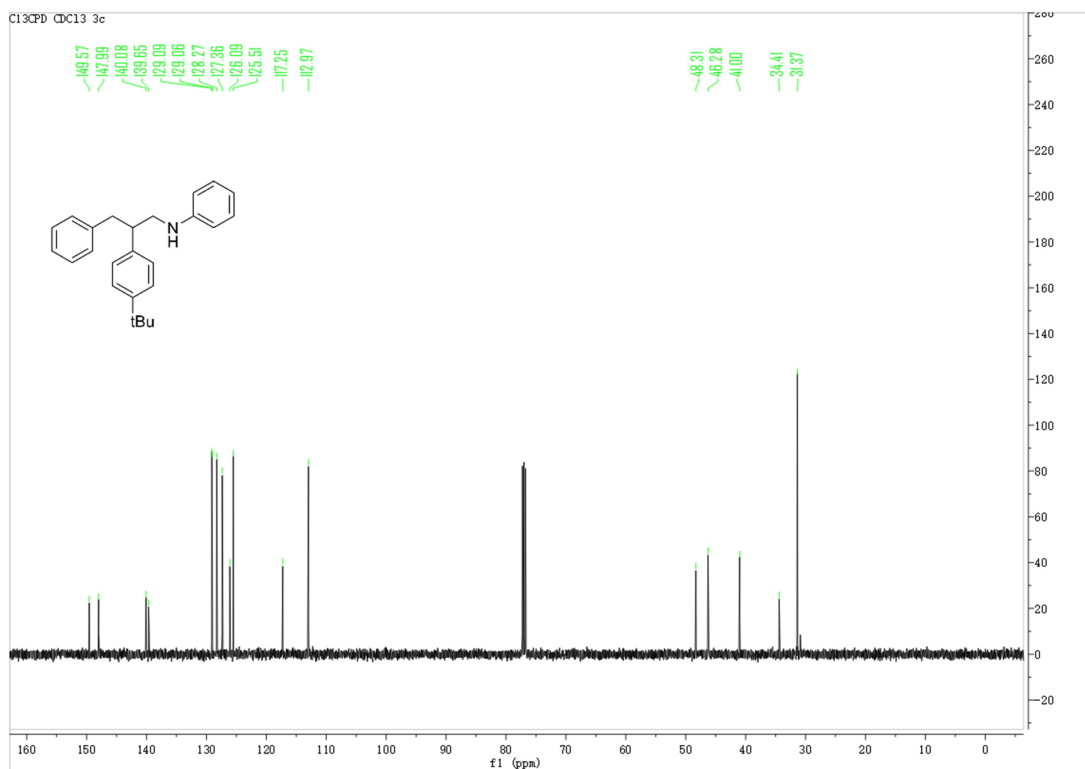

Supplementary Figure 101.  $^{13}\text{C}$  NMR spectrum of **3c** in  $\text{CDCl}_3$ .

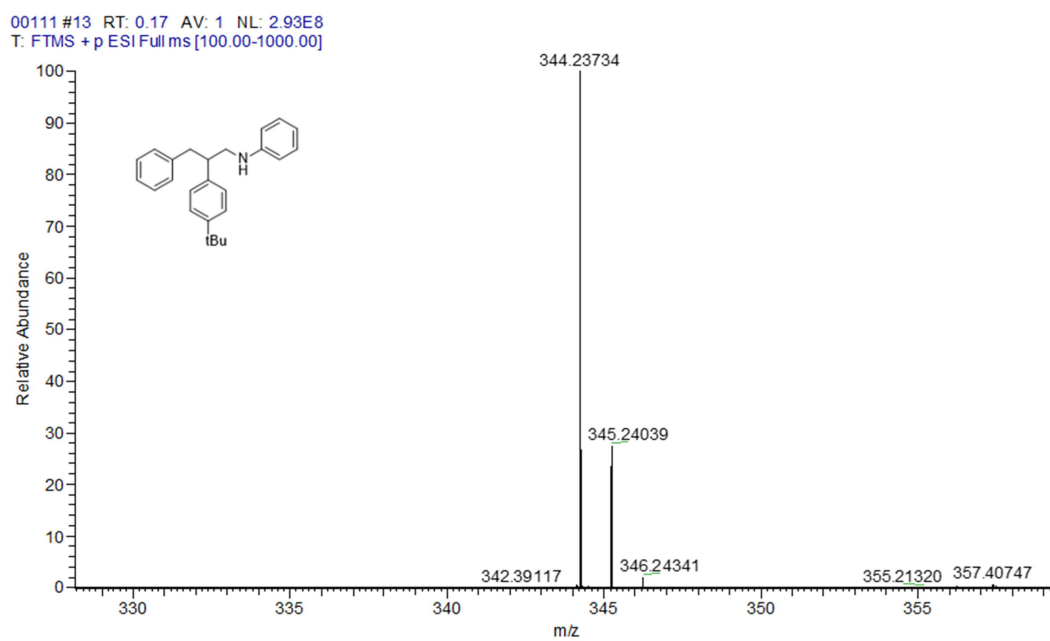

Supplementary Figure 102. HRMS of **3c**.

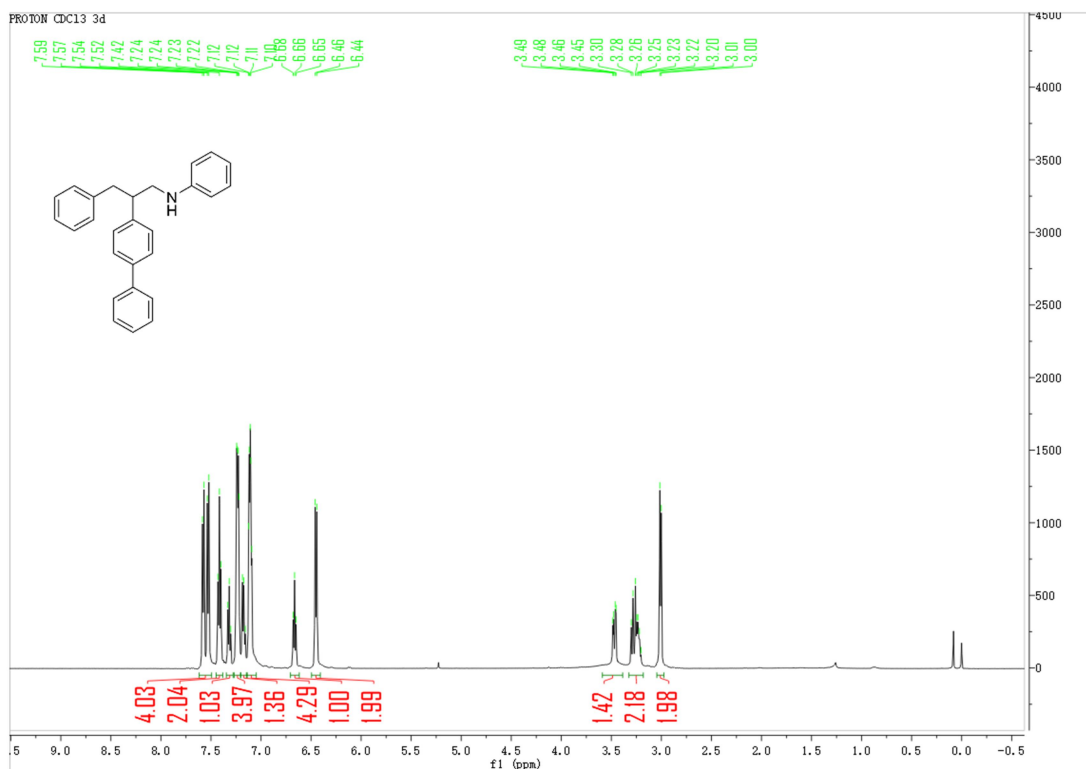

Supplementary Figure 103.  $^1\text{H}$  NMR spectrum of 3d in  $\text{CDCl}_3$ .

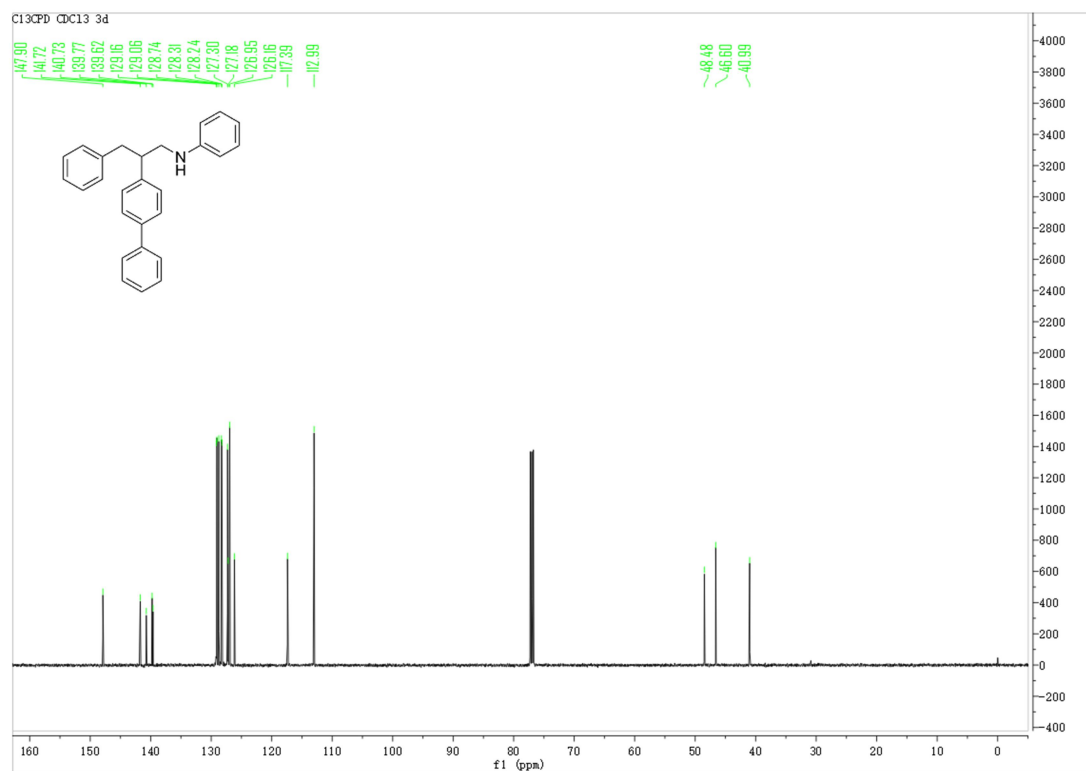

Supplementary Figure 104.  $^{13}\text{C}$  NMR spectrum of 3d in  $\text{CDCl}_3$ .

00114 #14 RT: 0.18 AV: 1 NL: 2.45E8  
T: FTMS + p ESI Full ms [100.00-1000.00]

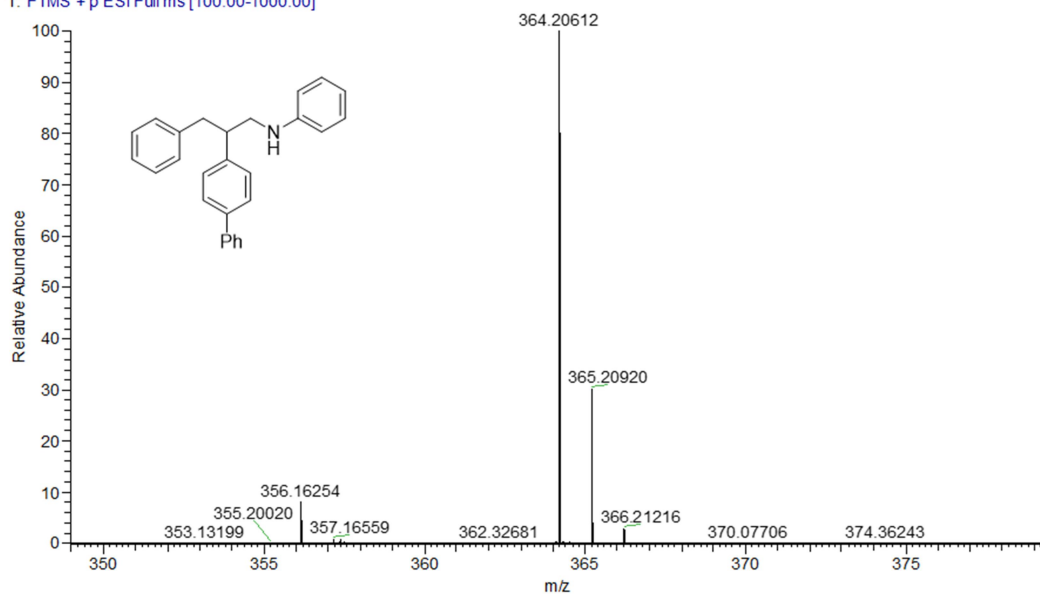

Supplementary Figure 105. HRMS of 3d.

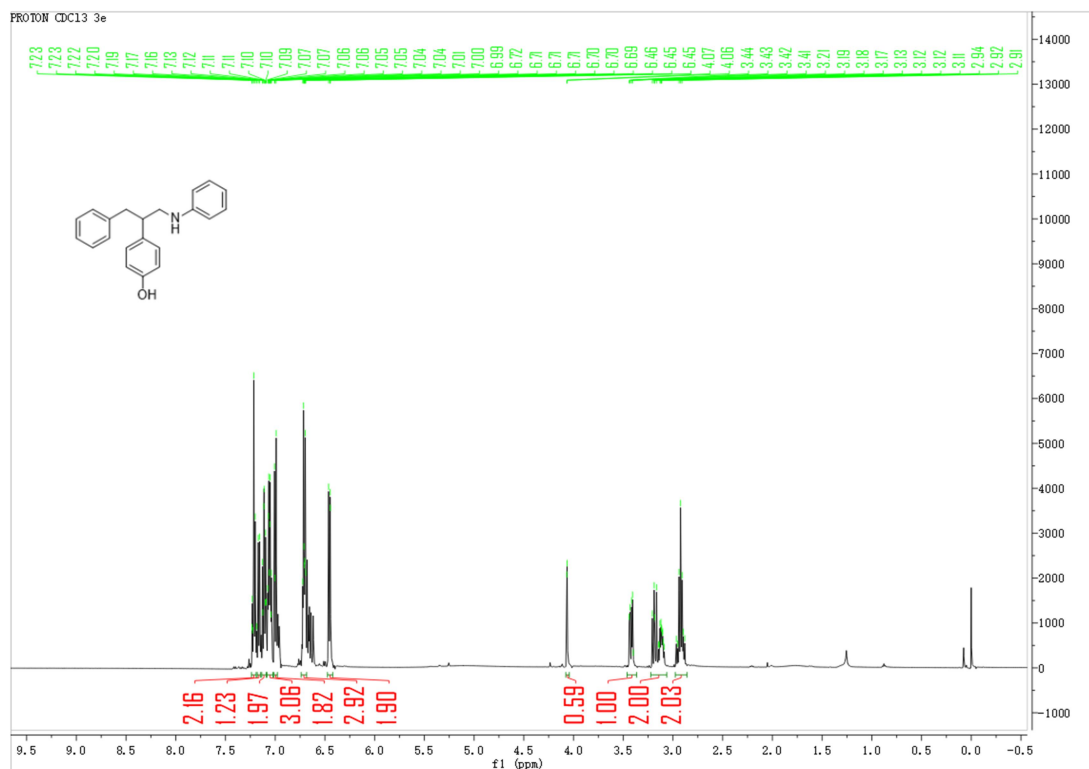

Supplementary Figure 106. <sup>1</sup>H NMR spectrum of 3e in CDCl<sub>3</sub>.

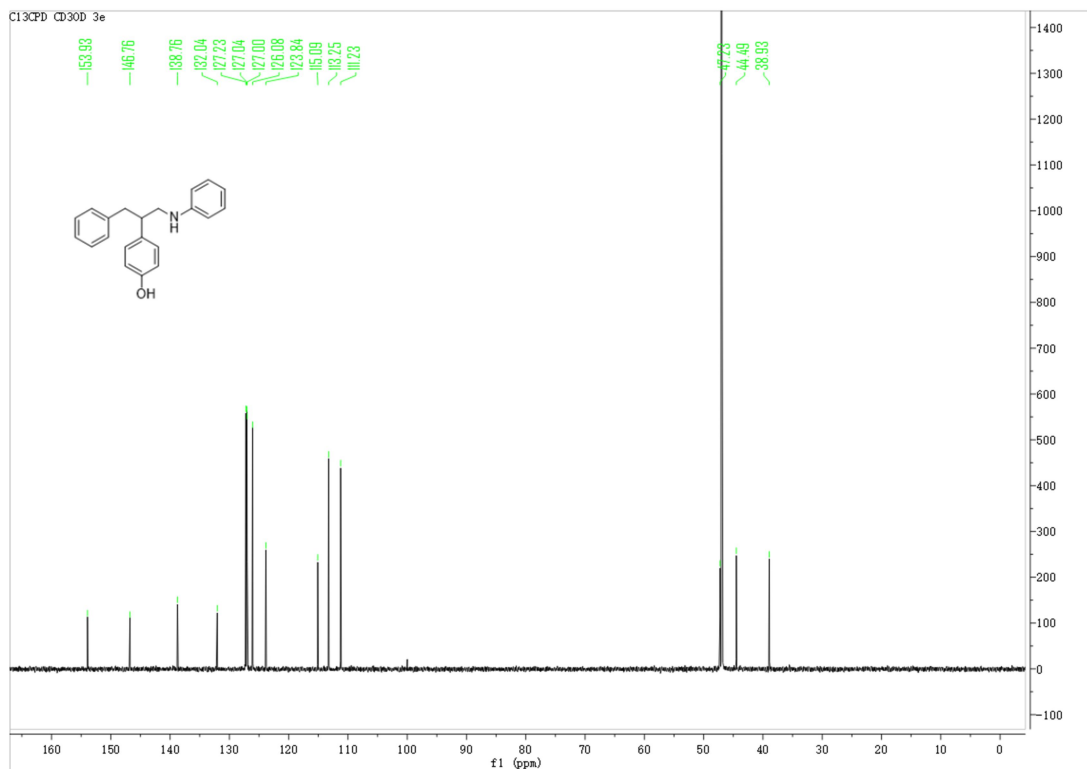

Supplementary Figure 107.  $^{13}\text{C}$  NMR spectrum of 3e in  $\text{CD}_3\text{OD}$ .

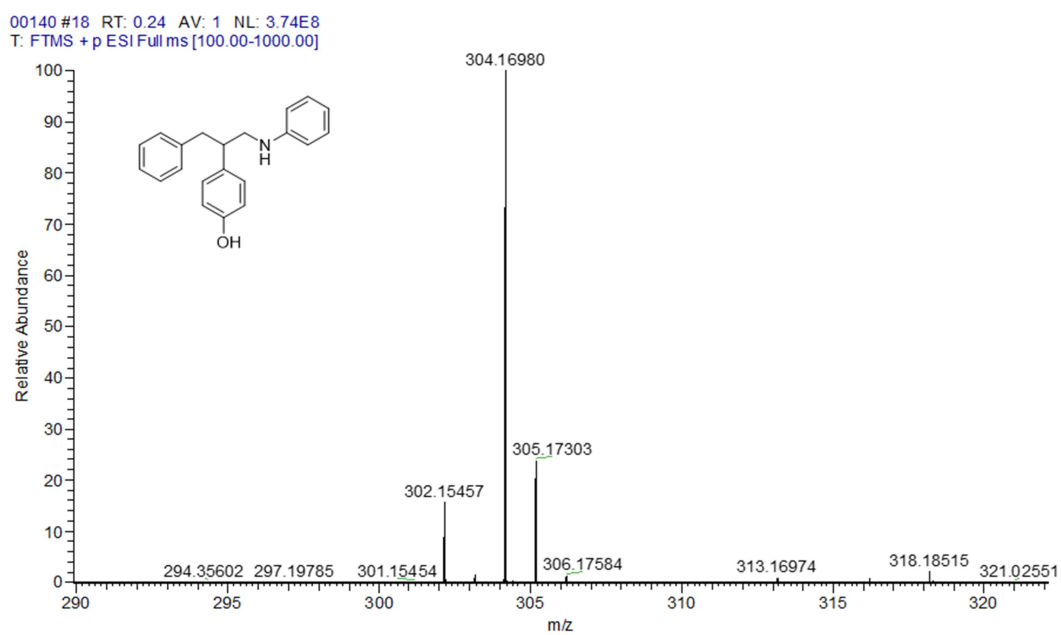

Supplementary Figure 108. HRMS of 3e.

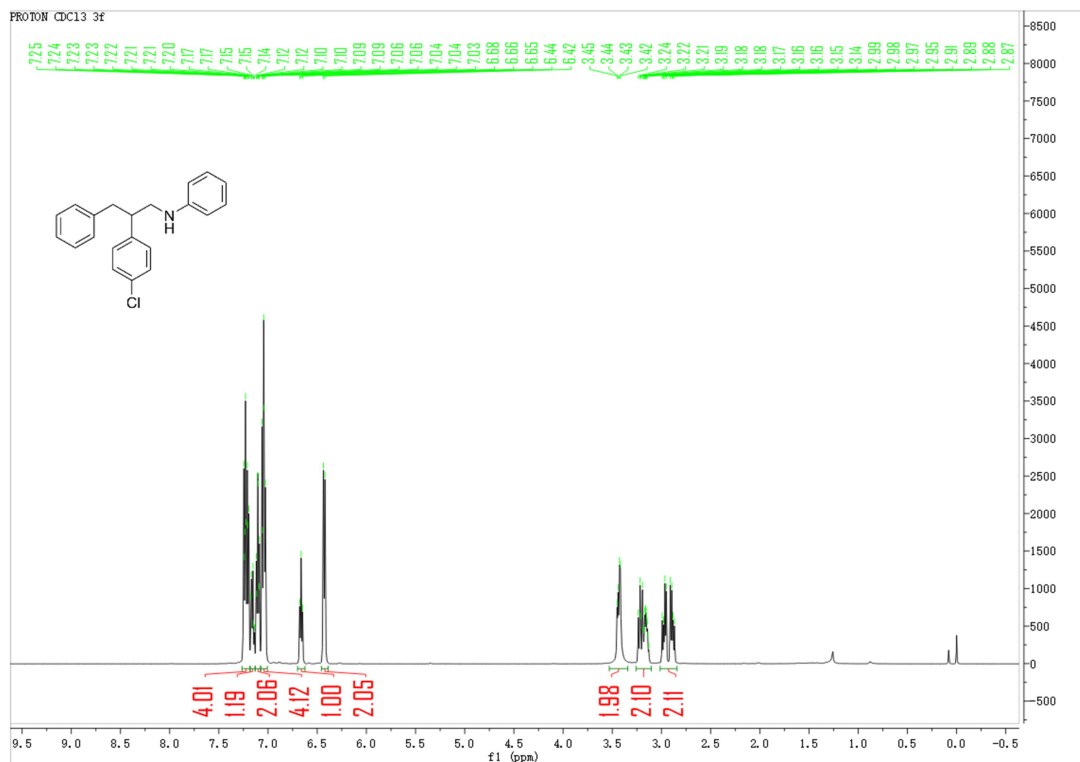

Supplementary Figure 109.  $^1\text{H}$  NMR spectrum of 3f in  $\text{CDCl}_3$ .

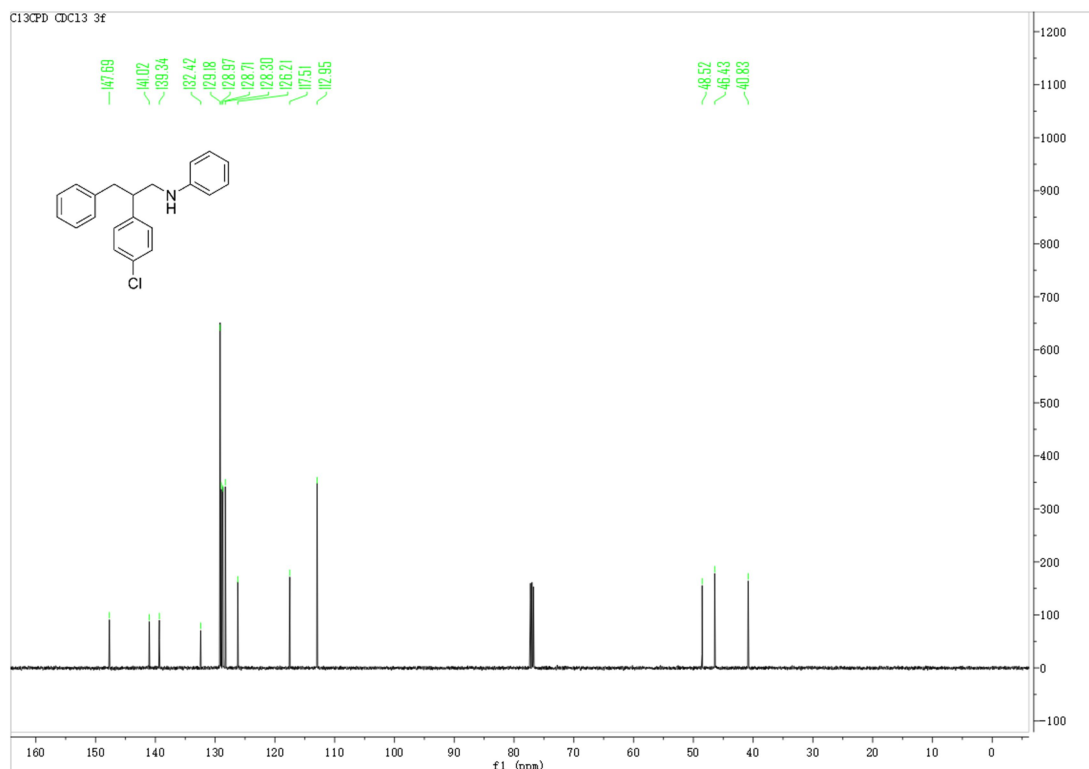

Supplementary Figure 110.  $^{13}\text{C}$  NMR spectrum of 3f in  $\text{CDCl}_3$ .



00112 #24 RT: 0.32 AV: 1 NL: 2.65E8  
T: FTMS + p ESI Fullms [100.00-1000.00]

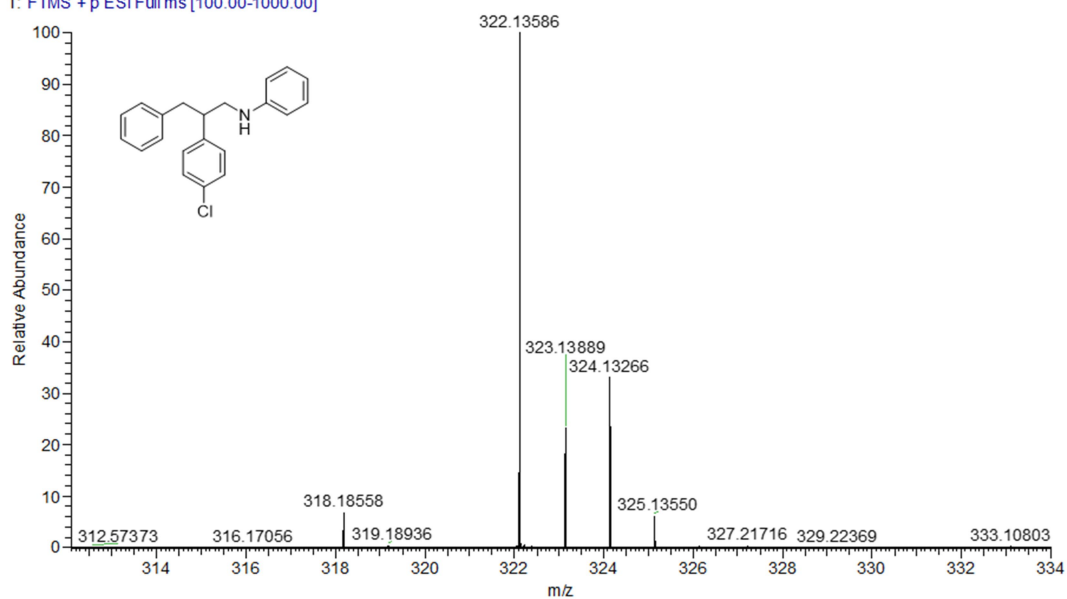

Supplementary Figure 111. HRMS of 1f.

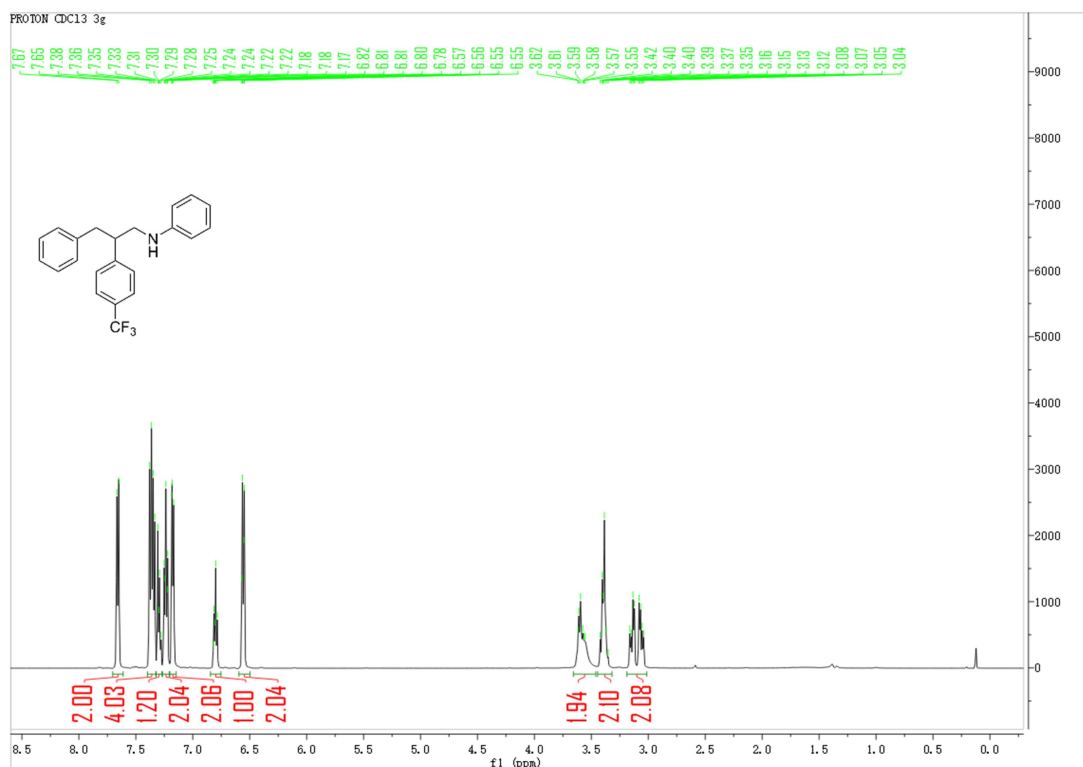

Supplementary Figure 112.  $^1\text{H}$  NMR spectrum of 3g in  $\text{CDCl}_3$ .

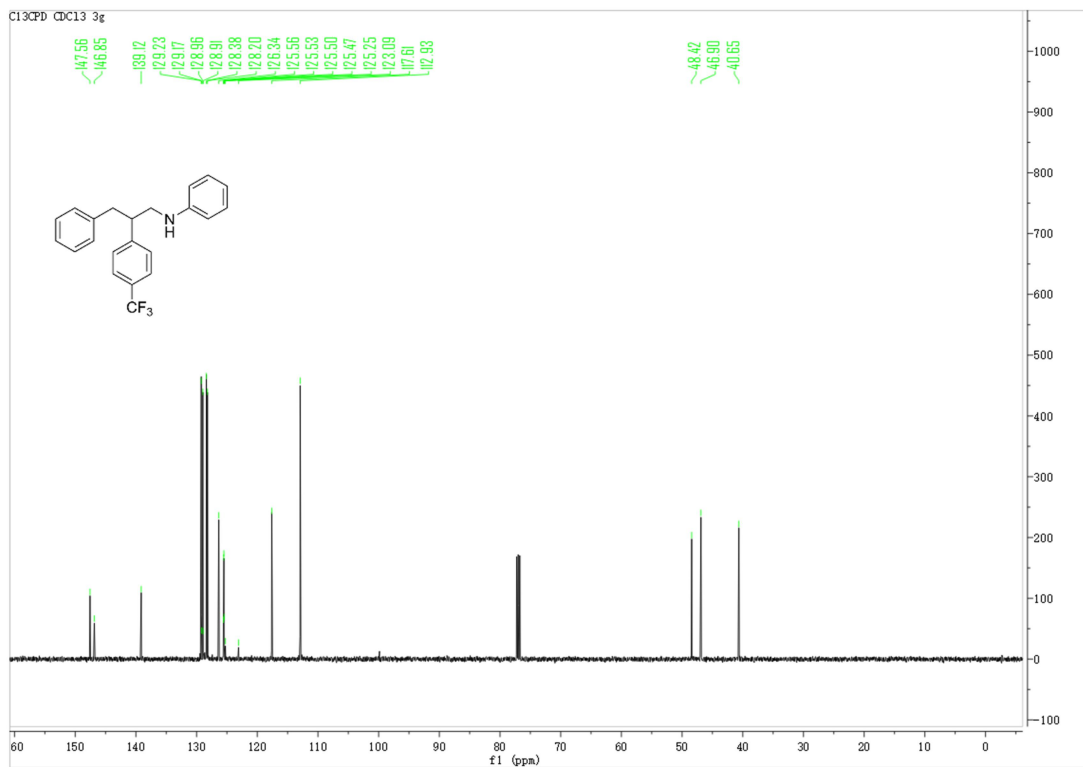

Supplementary Figure 113.  $^{13}\text{C}$  NMR spectrum of **3g** in  $\text{CDCl}_3$ .

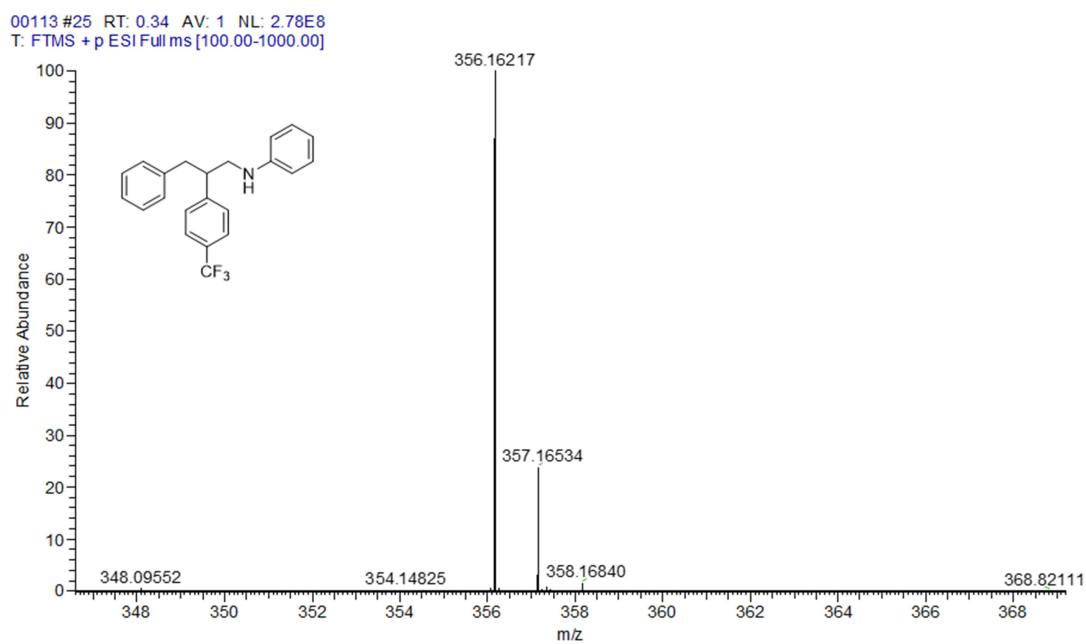

Supplementary Figure 114. HRMS of **3g**.

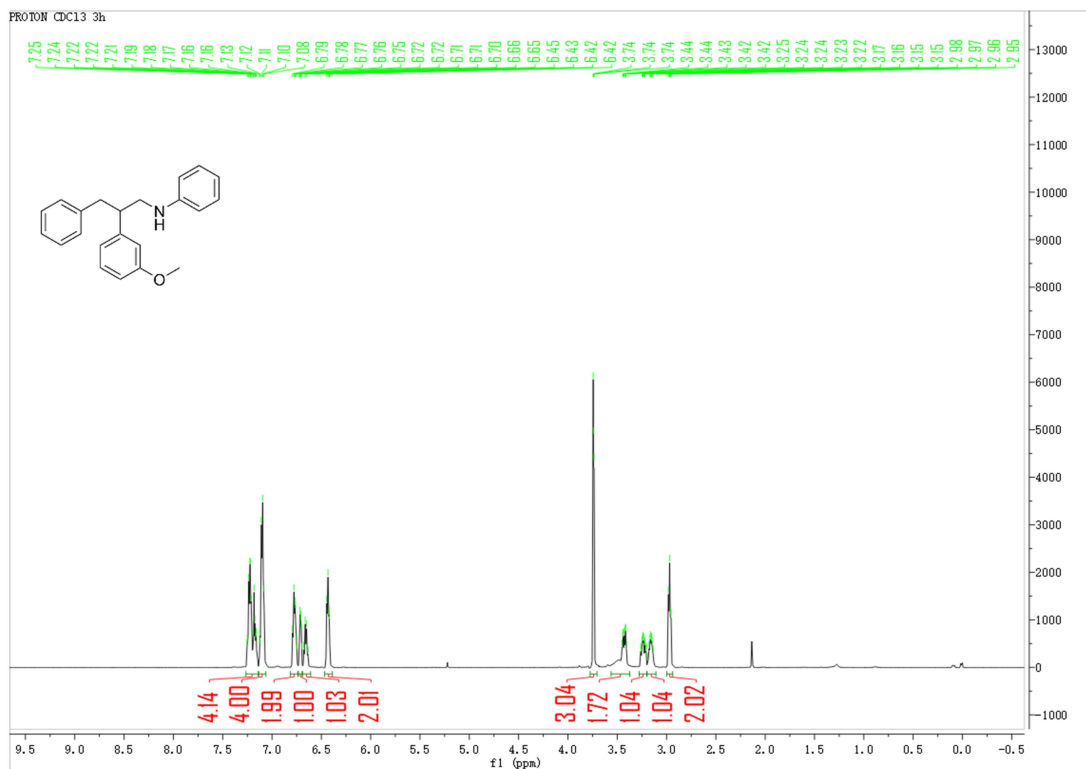

Supplementary Figure 115.  $^1\text{H}$  NMR spectrum of 3h in  $\text{CDCl}_3$ .

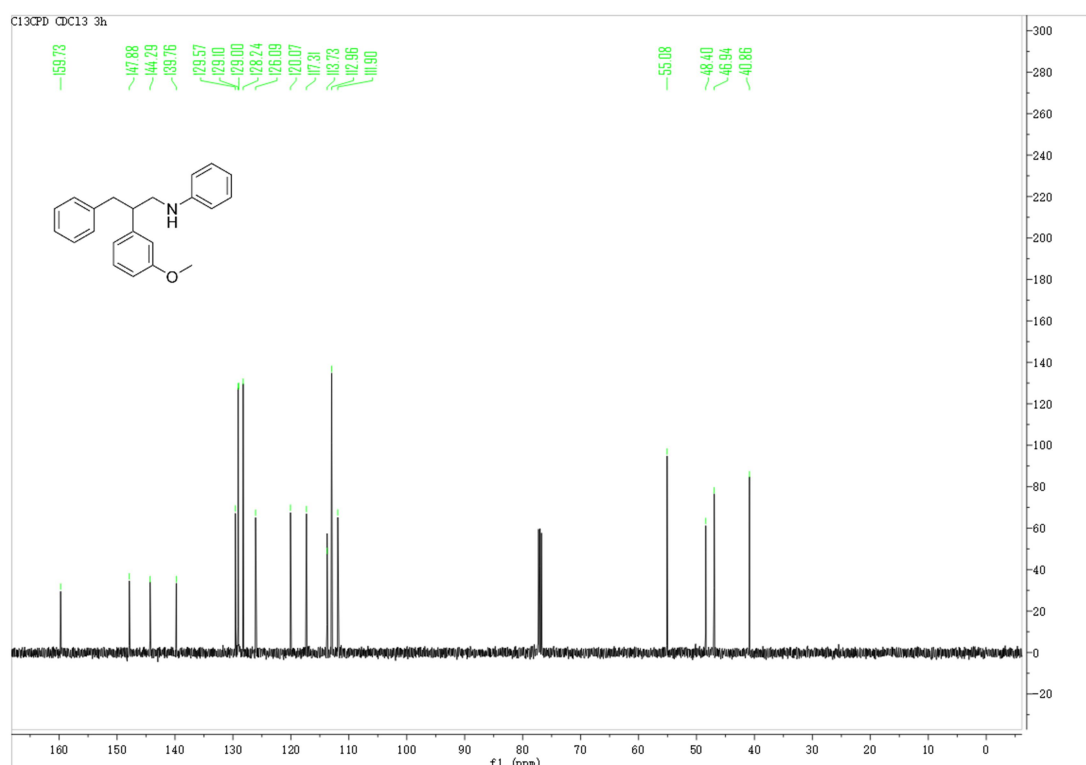

Supplementary Figure 116.  $^{13}\text{C}$  NMR spectrum of 3h in  $\text{CDCl}_3$ .

00109 #21 RT: 0.28 AV: 1 NL: 5.23E8  
T: FTMS + p ESI Full ms [100.00-1000.00]

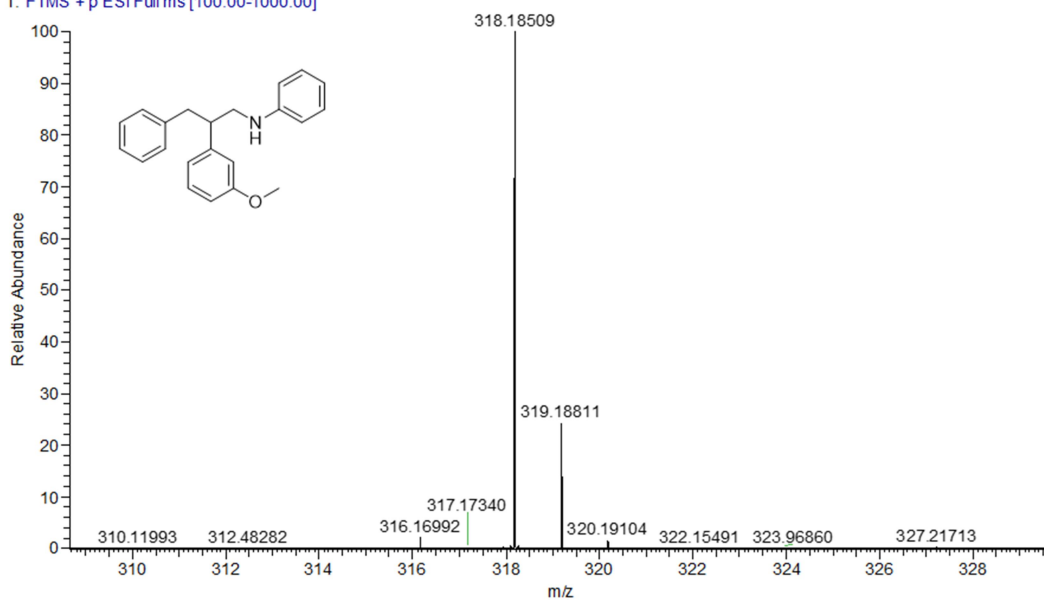

Supplementary Figure 117. HRMS of 3h.

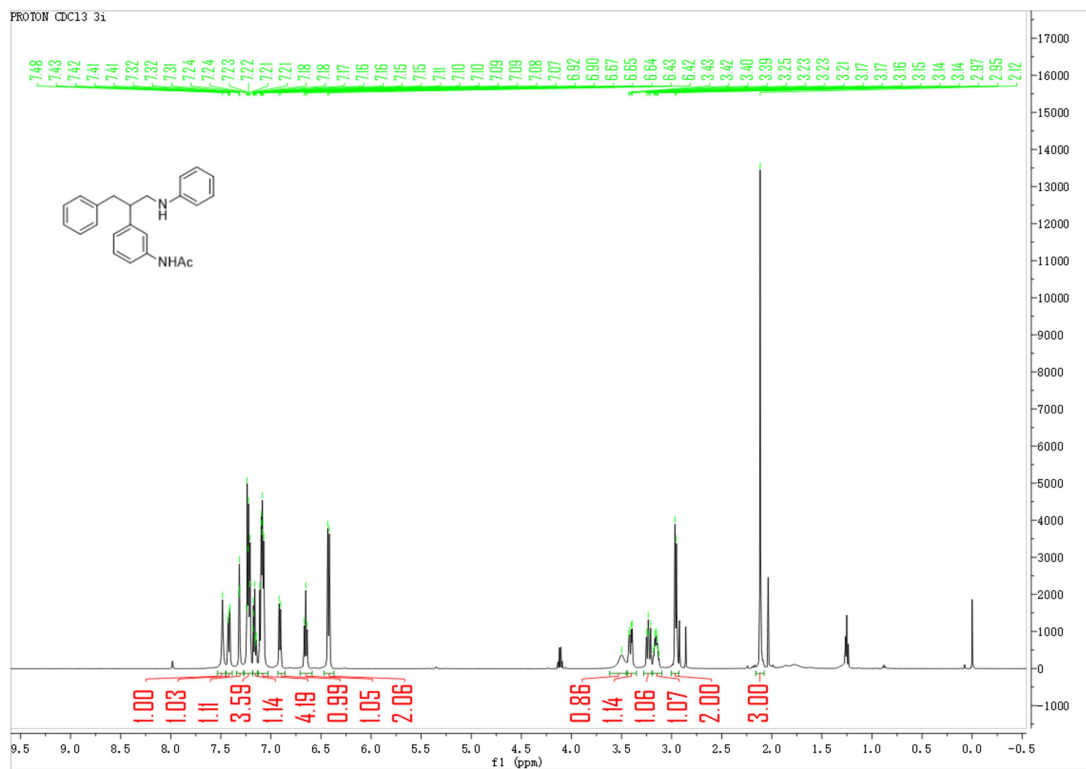

Supplementary Figure 118.  $^1\text{H}$  NMR spectrum of 3i in  $\text{CDCl}_3$ .

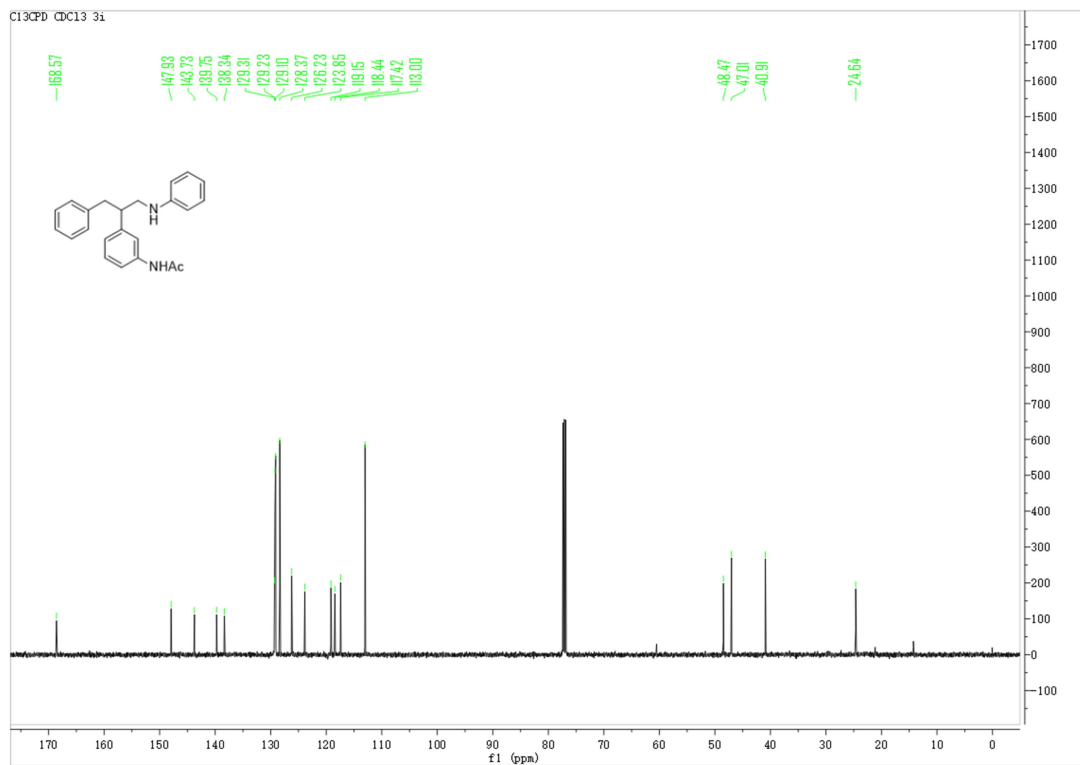

Supplementary Figure 119.  $^{13}\text{C}$  NMR spectrum of **3i** in  $\text{CDCl}_3$ .

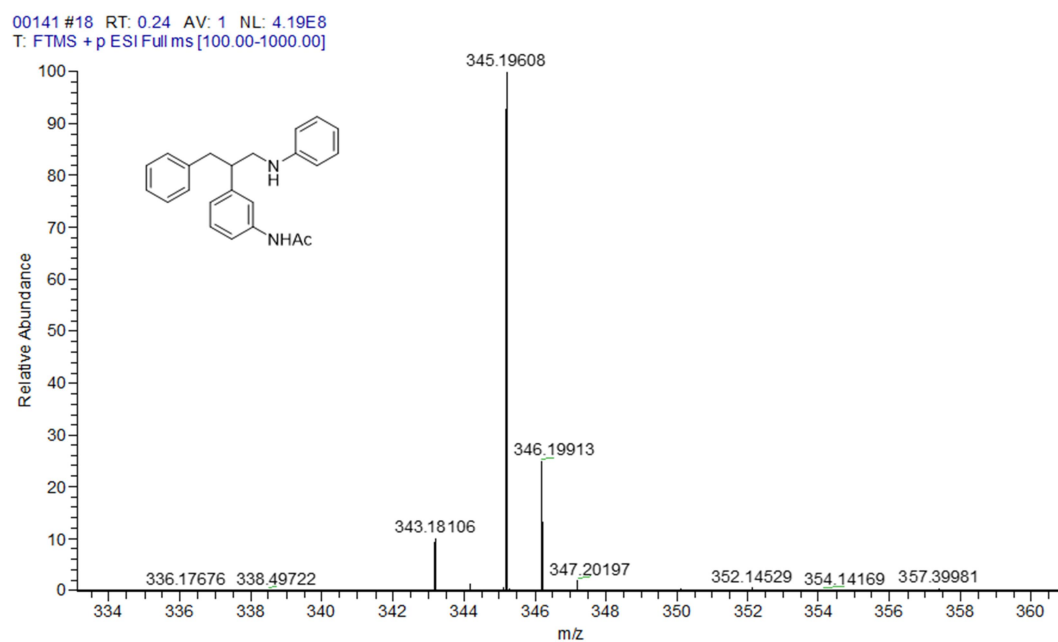

Supplementary Figure 120. HRMS of **3i**.

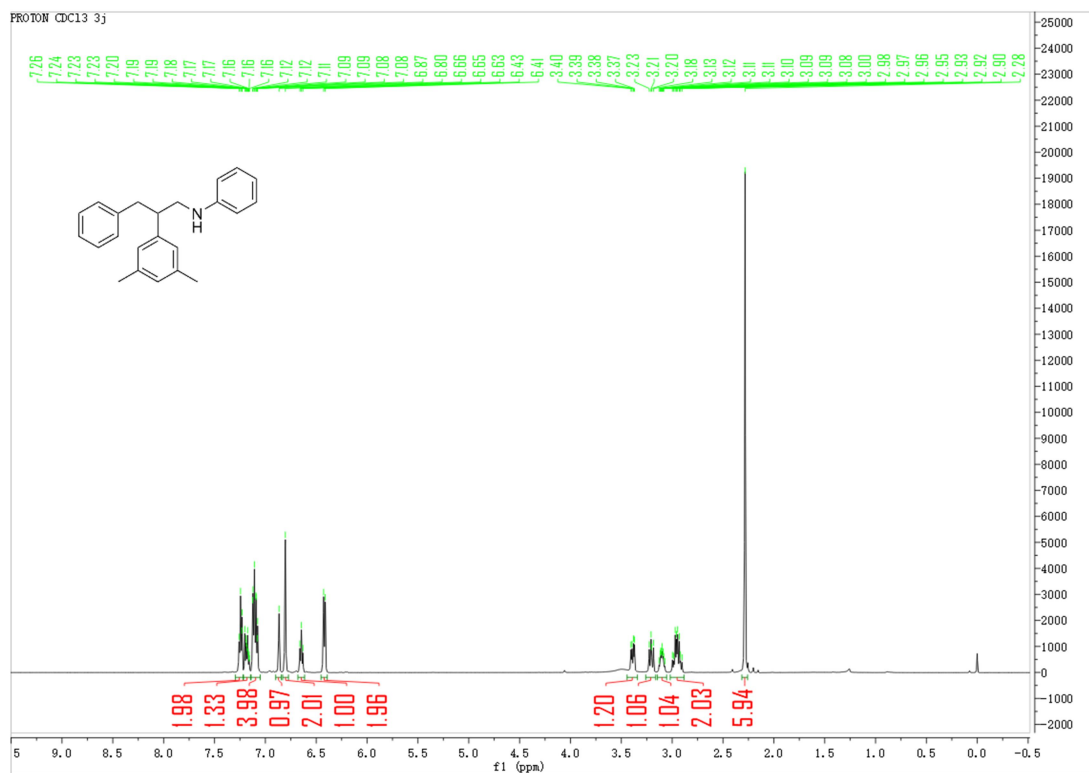

Supplementary Figure 121.  $^1\text{H}$  NMR spectrum of 3j in  $\text{CDCl}_3$ .

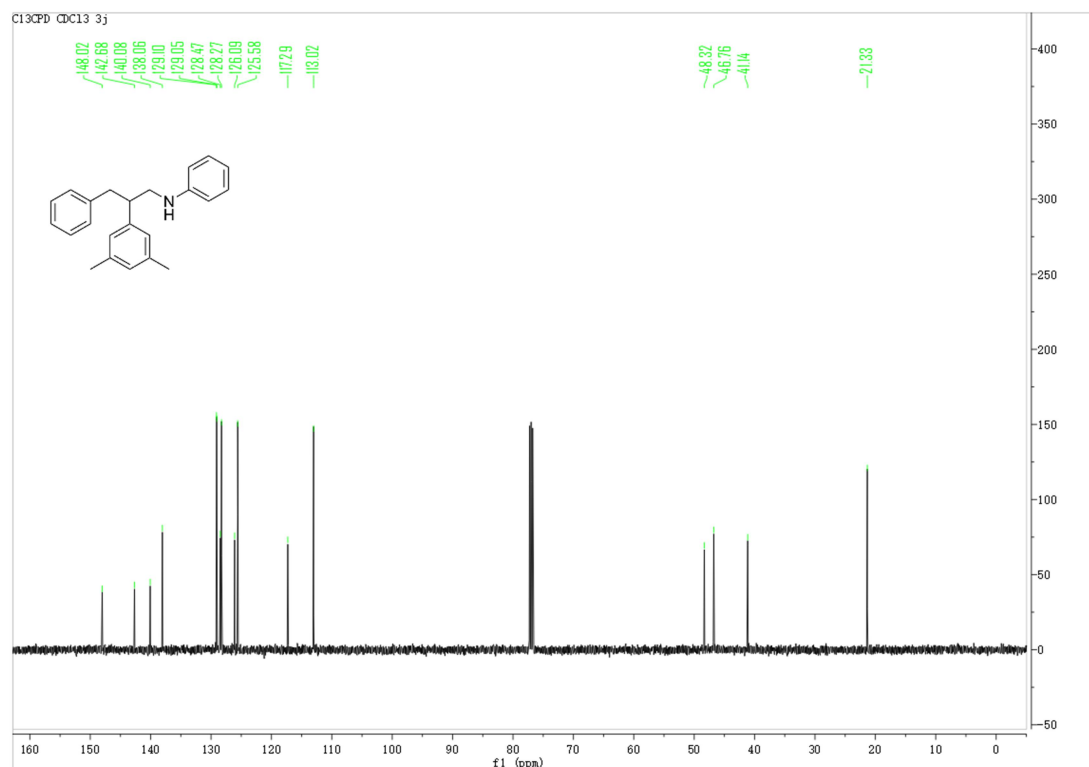

Supplementary Figure 122.  $^{13}\text{C}$  NMR spectrum of 3j in  $\text{CDCl}_3$ .

00116 #22 RT: 0.29 AV: 1 NL: 5.74E8  
T: FTMS + p ESI Full ms [100.00-1000.00]

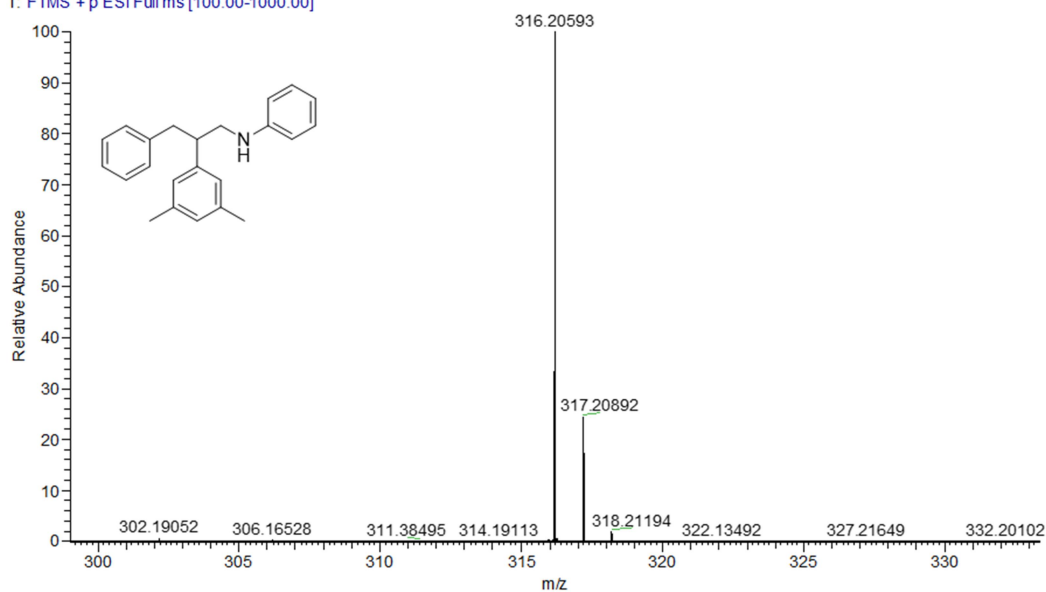

Supplementary Figure 123. HRMS of 3j.

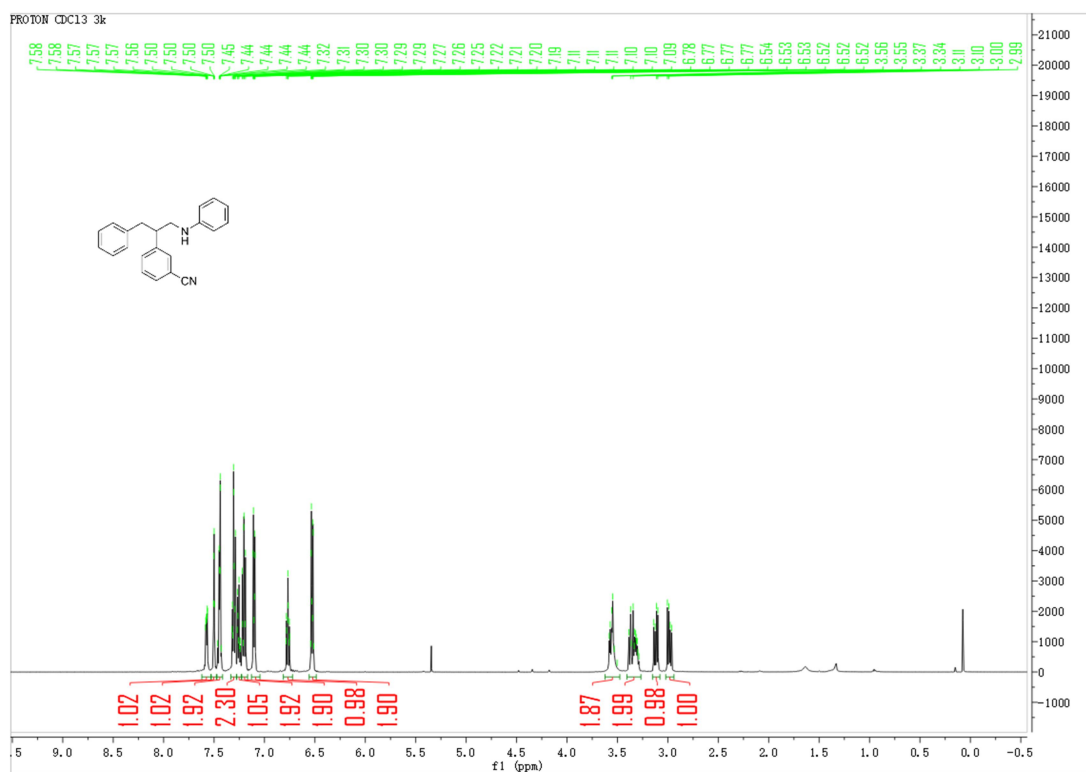

Supplementary Figure 124.  $^1\text{H}$  NMR spectrum of 3k in  $\text{CDCl}_3$ .

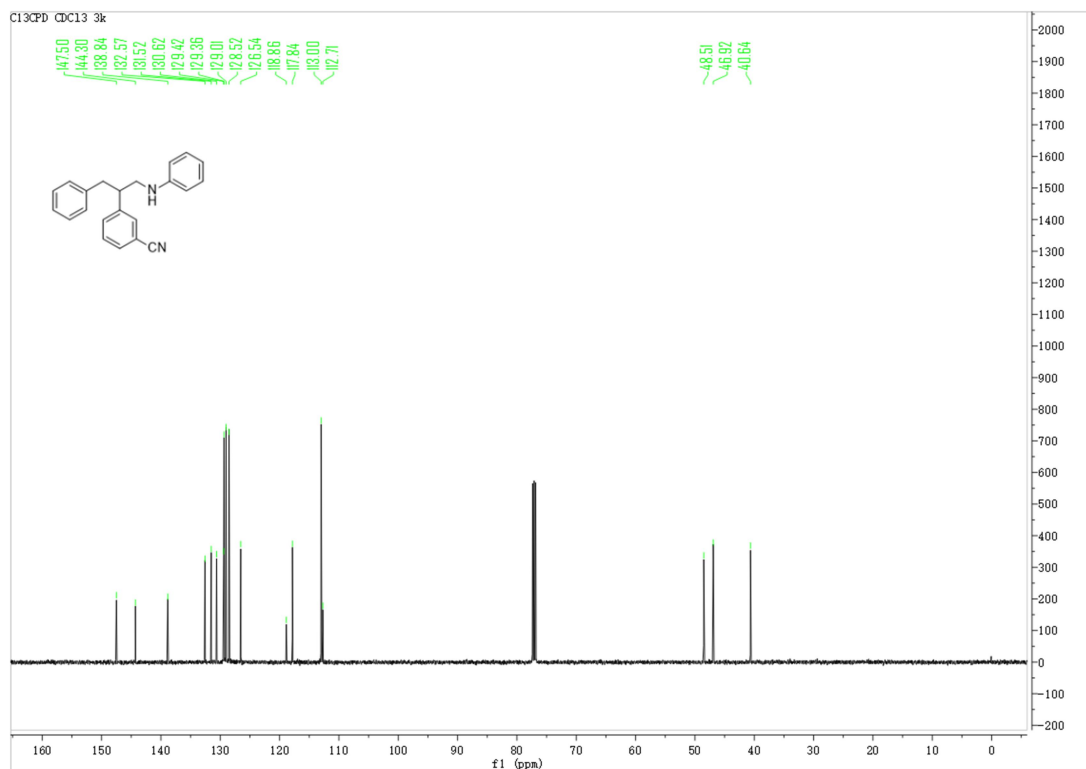

Supplementary Figure 125.  $^{13}\text{C}$  NMR spectrum of **3k** in  $\text{CDCl}_3$ .

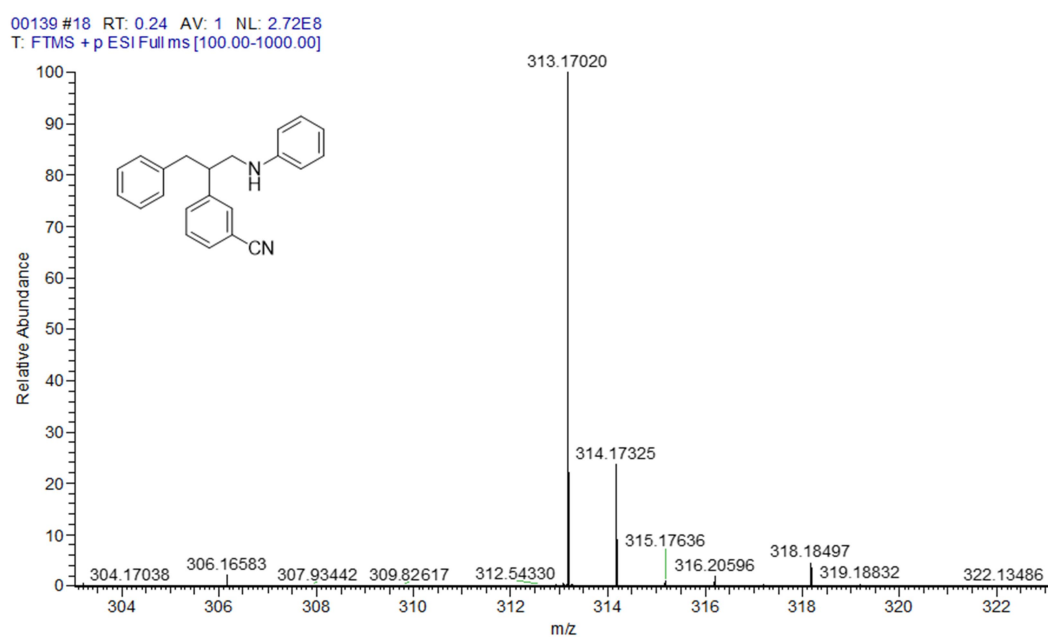

Supplementary Figure 126. HRMS of **3k**.



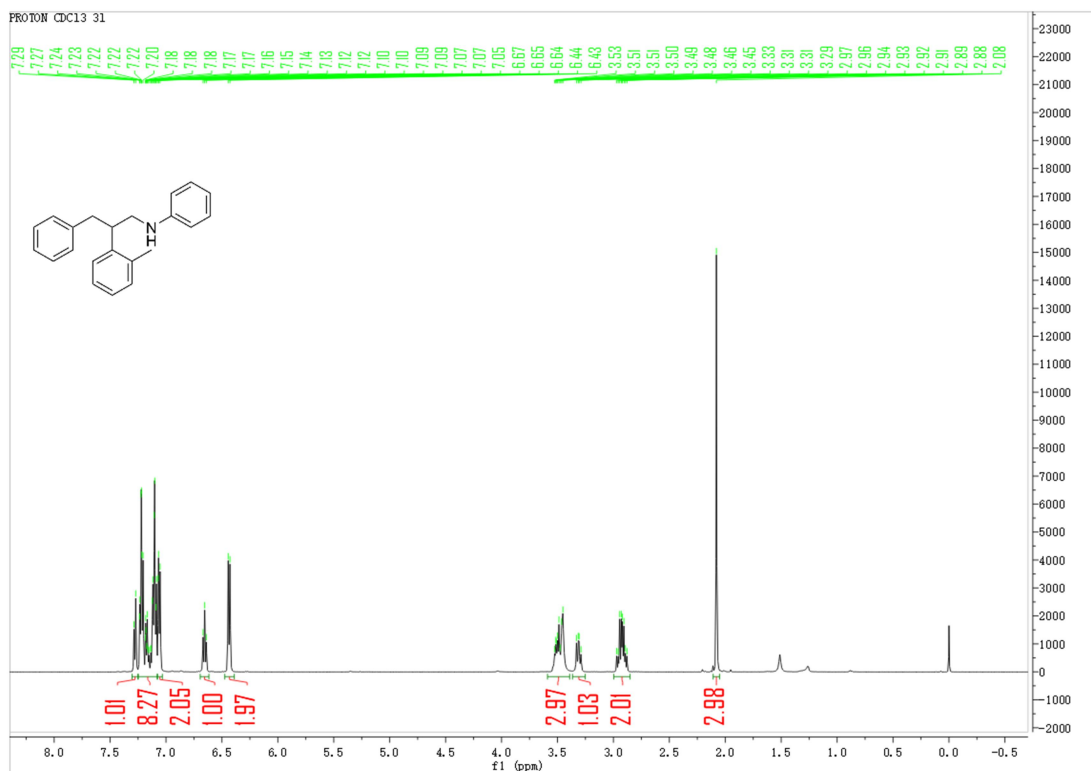

Supplementary Figure 127.  $^1\text{H}$  NMR spectrum of 31 in  $\text{CDCl}_3$ .

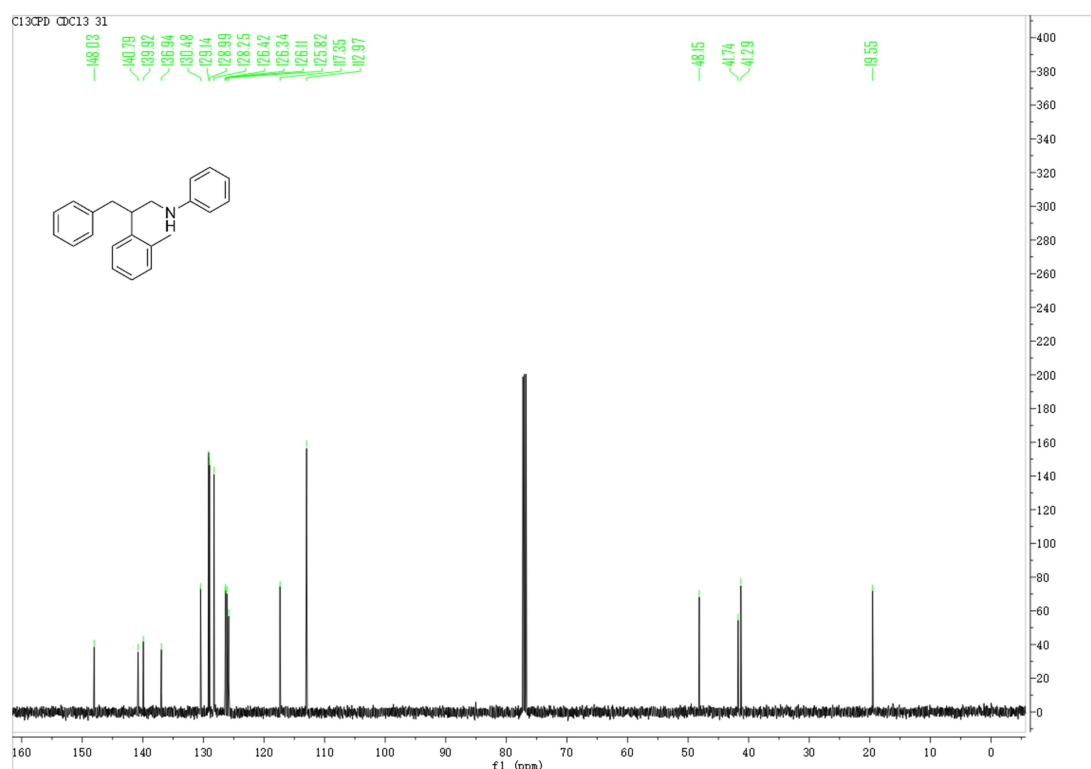

Supplementary Figure 128.  $^{13}\text{C}$  NMR spectrum of 31 in  $\text{CDCl}_3$ .

00108 #16 RT: 0.21 AV: 1 NL: 5.73E8  
T: FTMS + p ESI Full ms [100.00-1000.00]

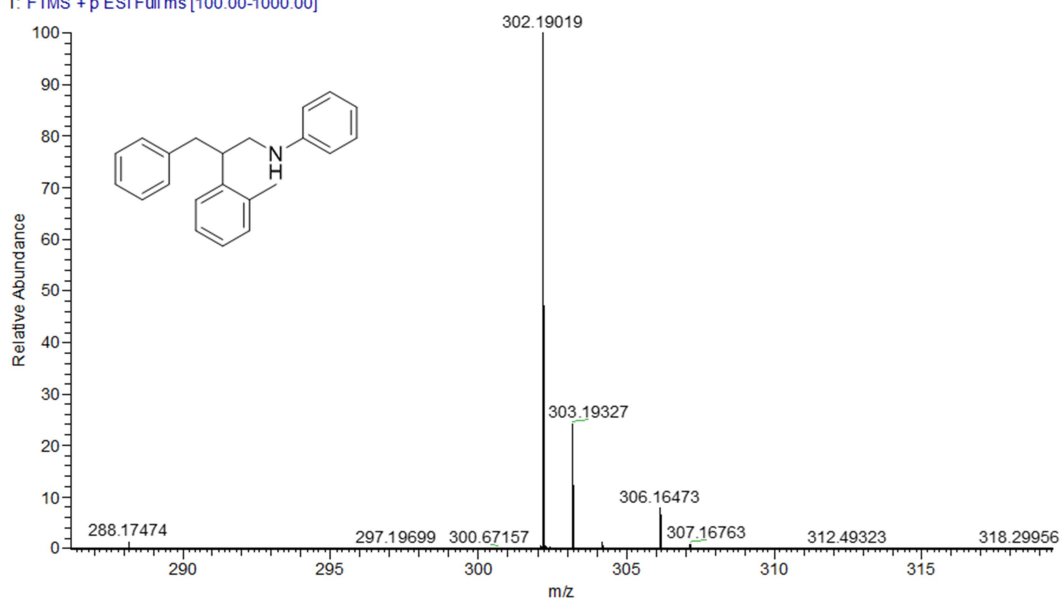

Supplementary Figure 129. HRMS of 3l.

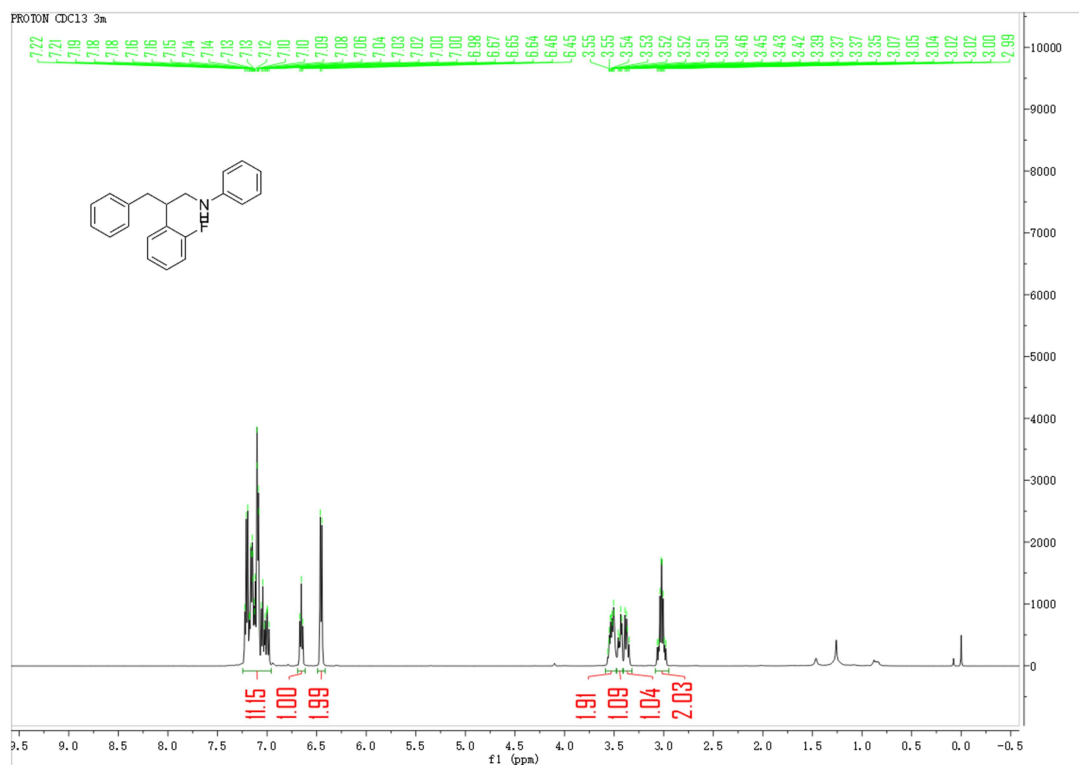

Supplementary Figure 130. <sup>1</sup>H NMR spectrum of 3m in CDCl<sub>3</sub>.

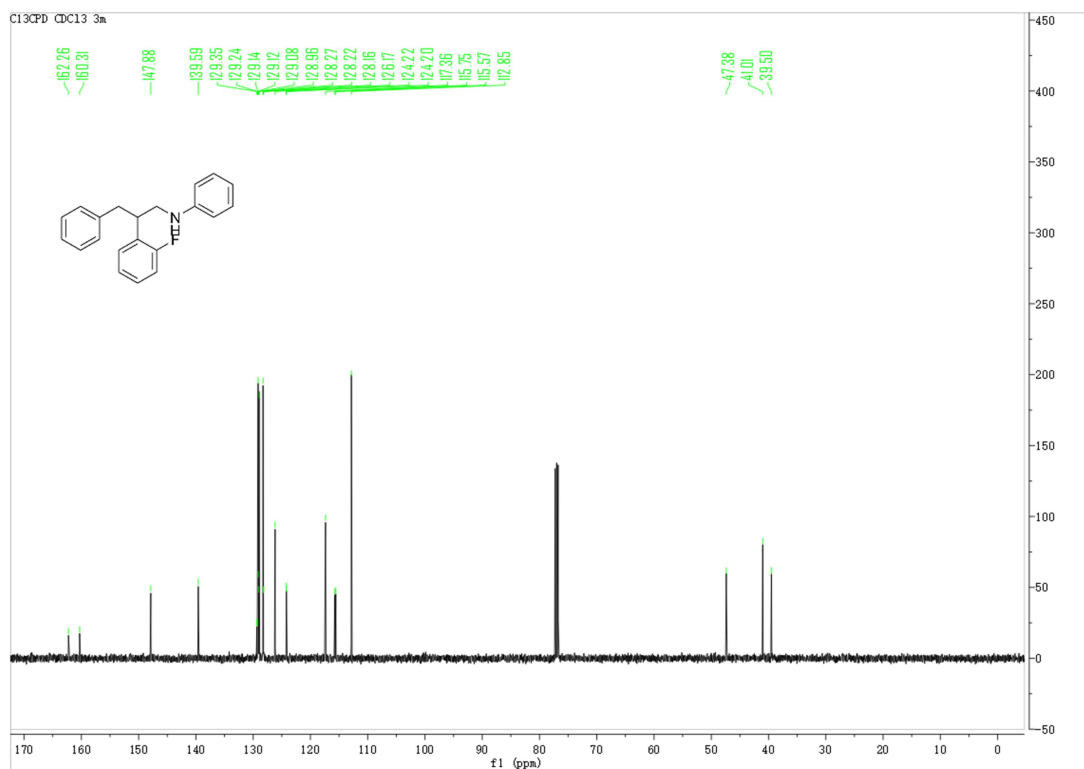

Supplementary Figure 131.  $^{13}\text{C}$  NMR spectrum of **3m** in  $\text{CDCl}_3$ .

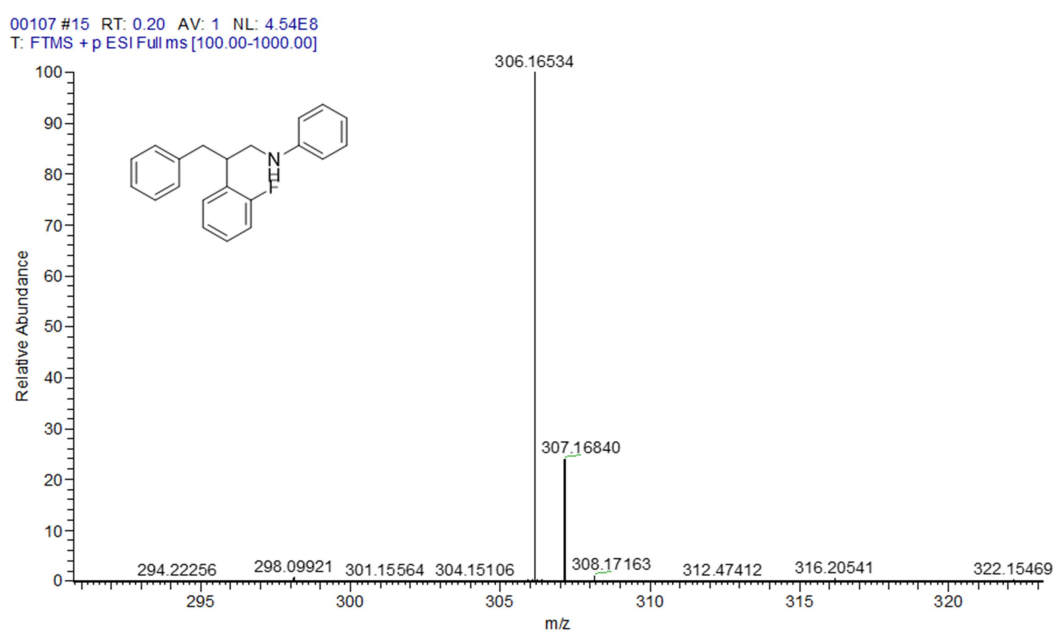

Supplementary Figure 132. HRMS of **3m**.

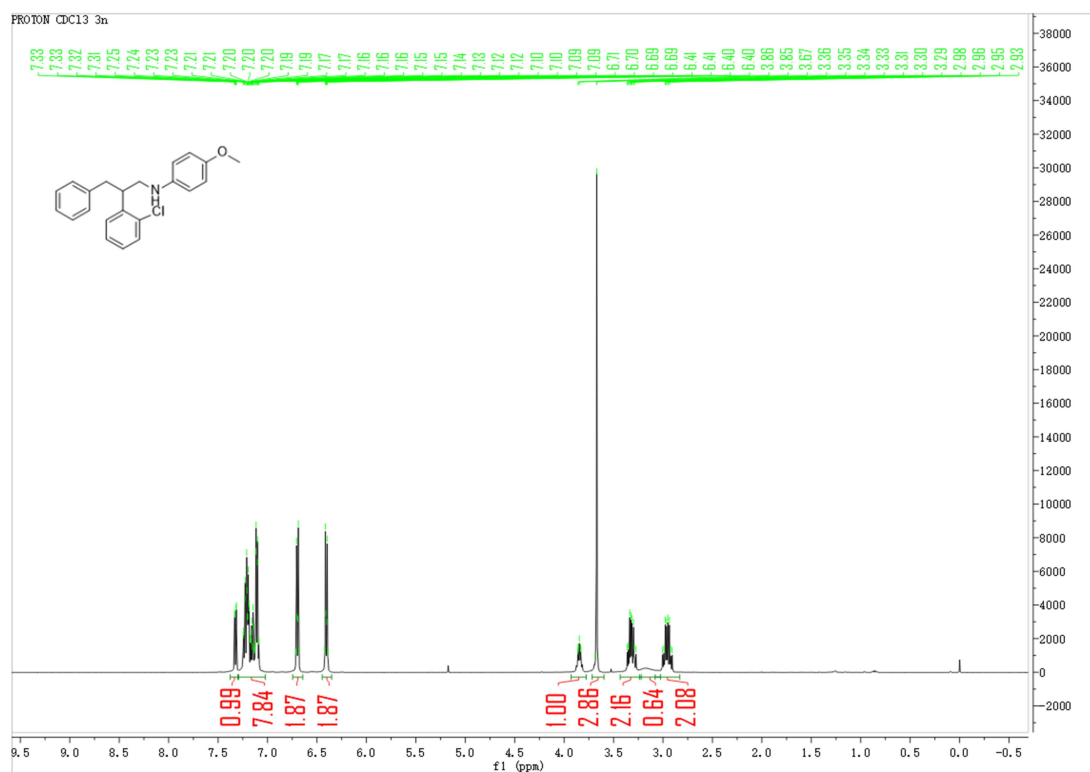

Supplementary Figure 133.  $^1\text{H}$  NMR spectrum of **3n** in  $\text{CDCl}_3$ .

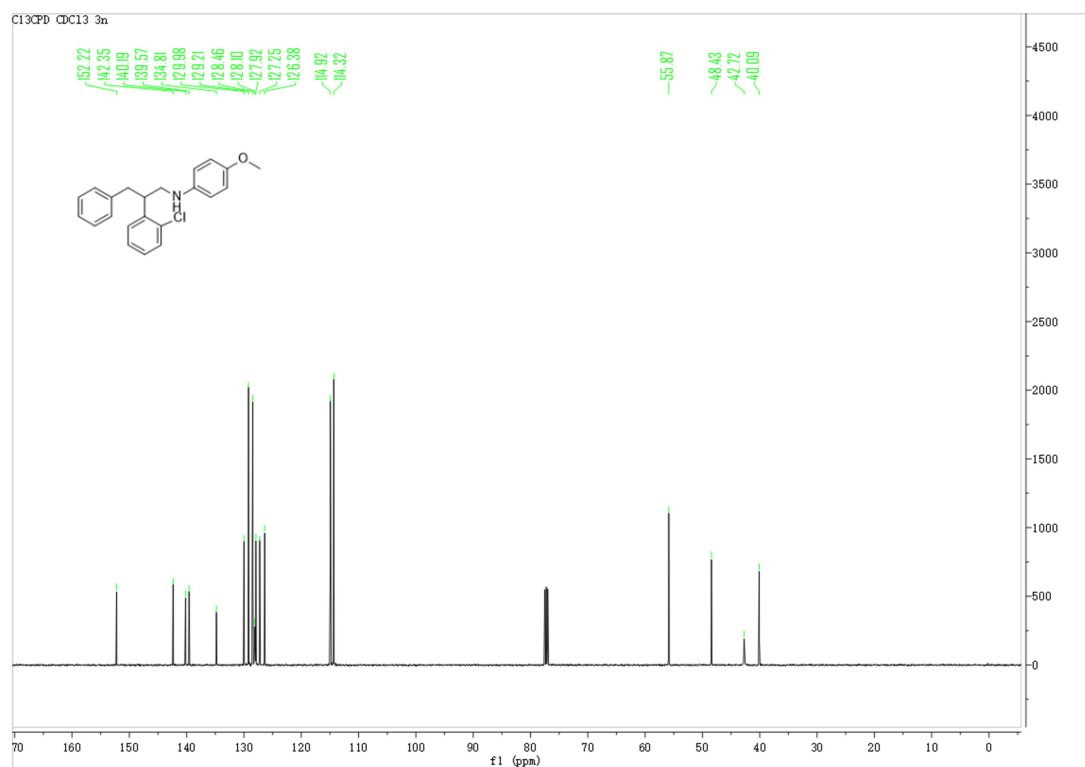

Supplementary Figure 134.  $^{13}\text{C}$  NMR spectrum of **3n** in  $\text{CDCl}_3$ .

00138 #15 RT: 0.19 AV: 1 NL: 2.44E8  
T: FTMS + p ESI Full ms [100.00-1000.00]

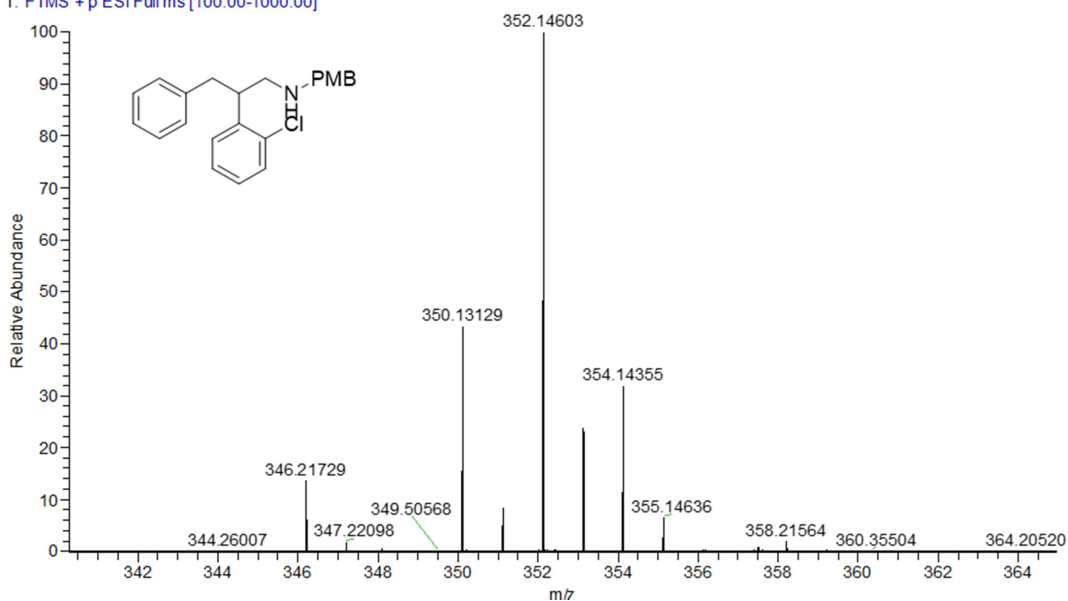

Supplementary Figure 135. HRMS of **3n**.

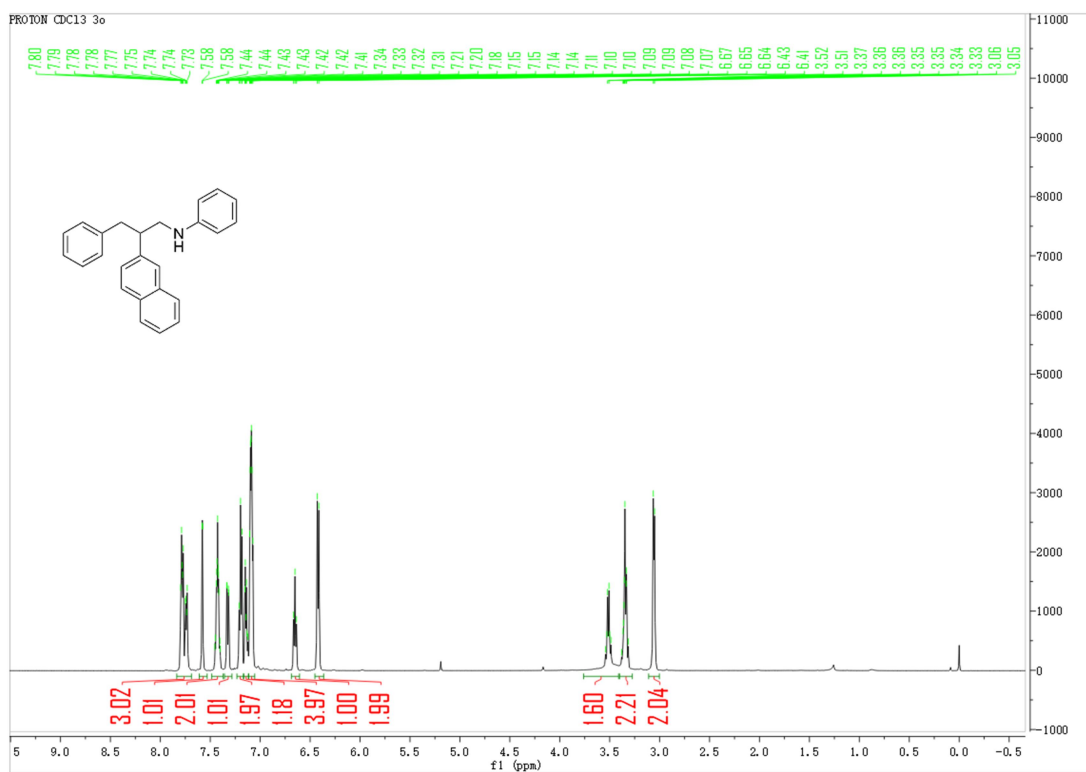

Supplementary Figure 136.  $^1\text{H}$  NMR spectrum of **3o** in  $\text{CDCl}_3$ .

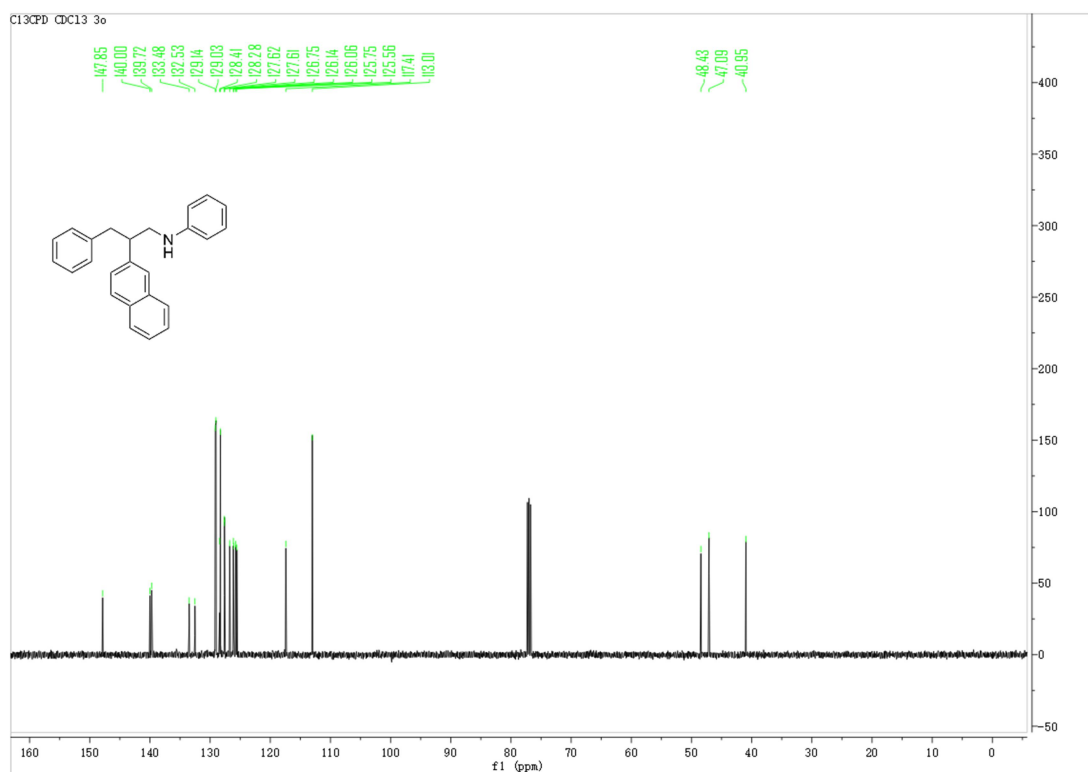

Supplementary Figure 137.  $^{13}\text{C}$  NMR spectrum of **3o** in  $\text{CDCl}_3$ .

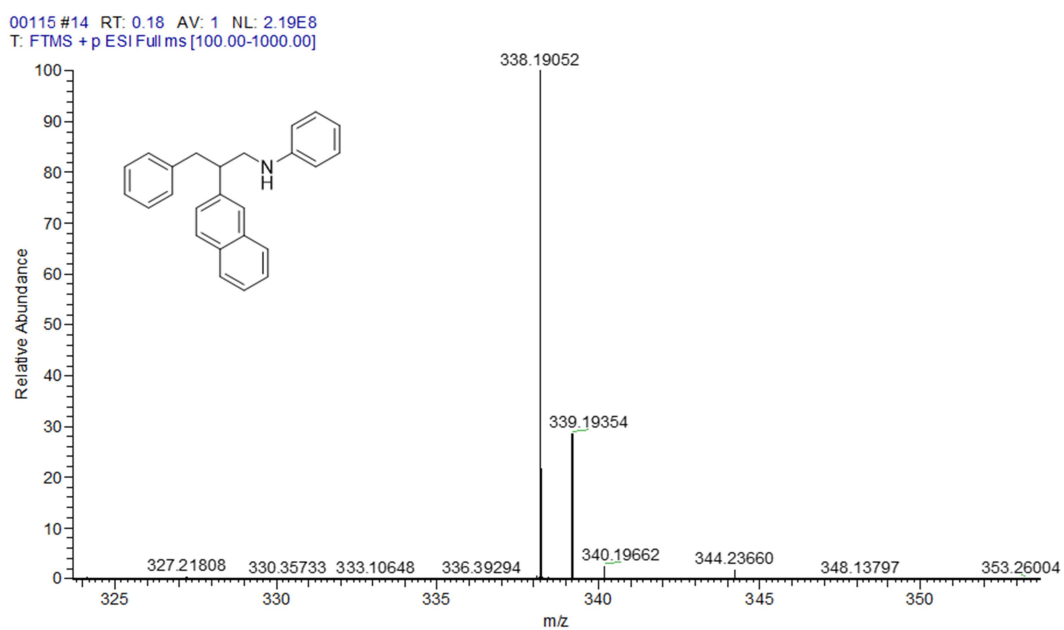

Supplementary Figure 138. HRMS of **1o**.

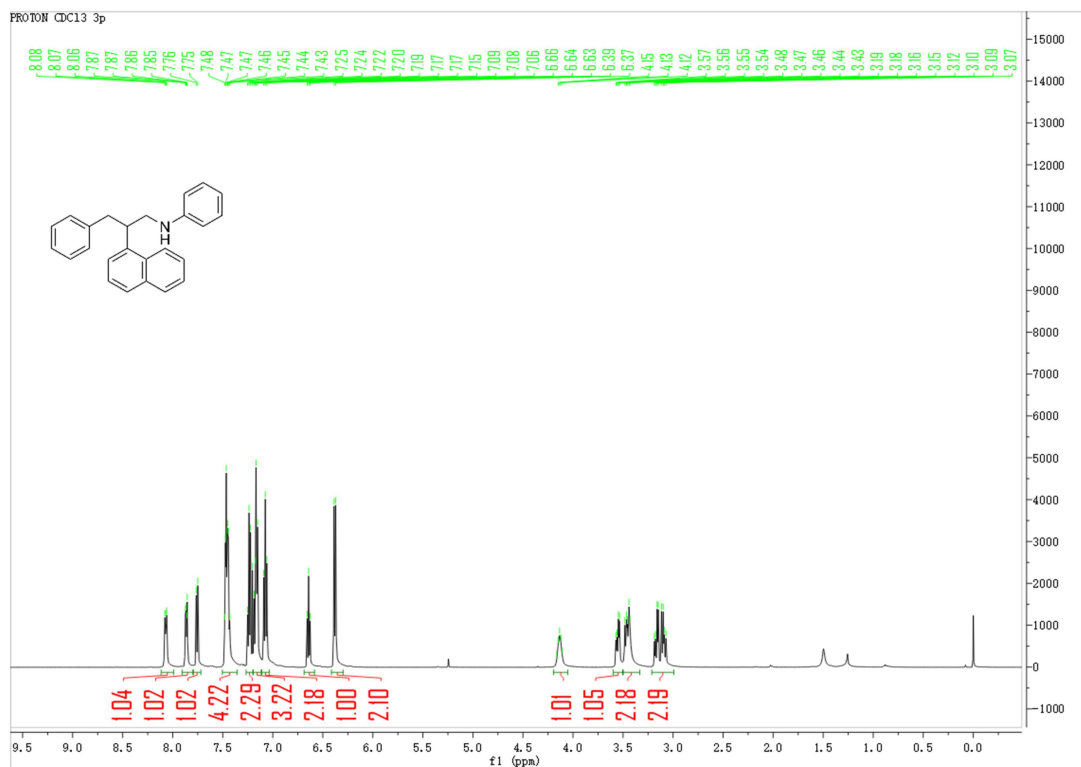

Supplementary Figure 139.  $^1\text{H}$  NMR spectrum of **3p** in  $\text{CDCl}_3$ .

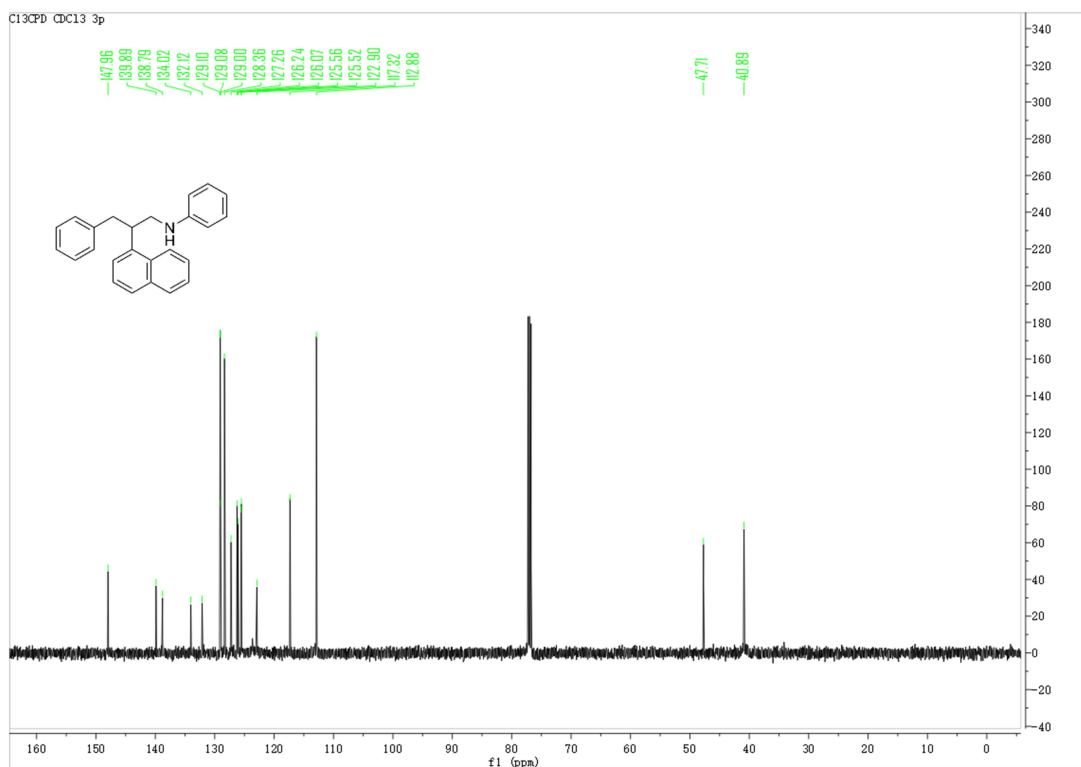

Supplementary Figure 140.  $^{13}\text{C}$  NMR spectrum of **3p** in  $\text{CDCl}_3$ .

00117 #15 RT: 0.19 AV: 1 NL: 3.02E8  
T: FTMS + p ESI Full ms [100.00-1000.00]

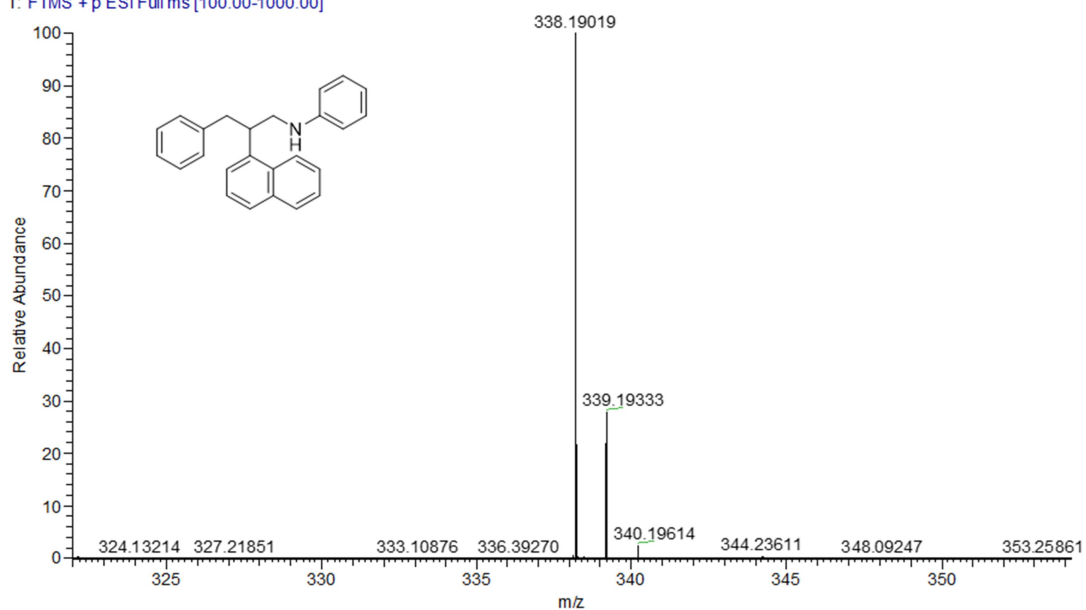

Supplementary Figure 141. HRMS of 3p.

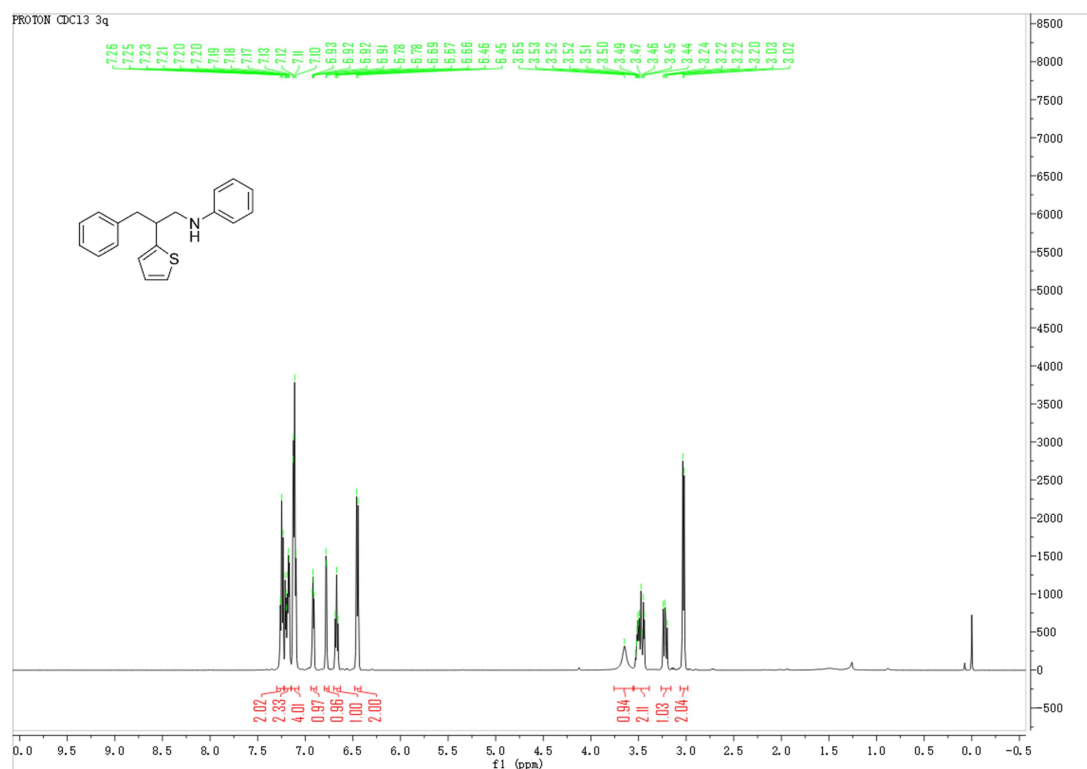

Supplementary Figure 142. <sup>1</sup>H NMR spectrum of 3q in CDCl<sub>3</sub>.



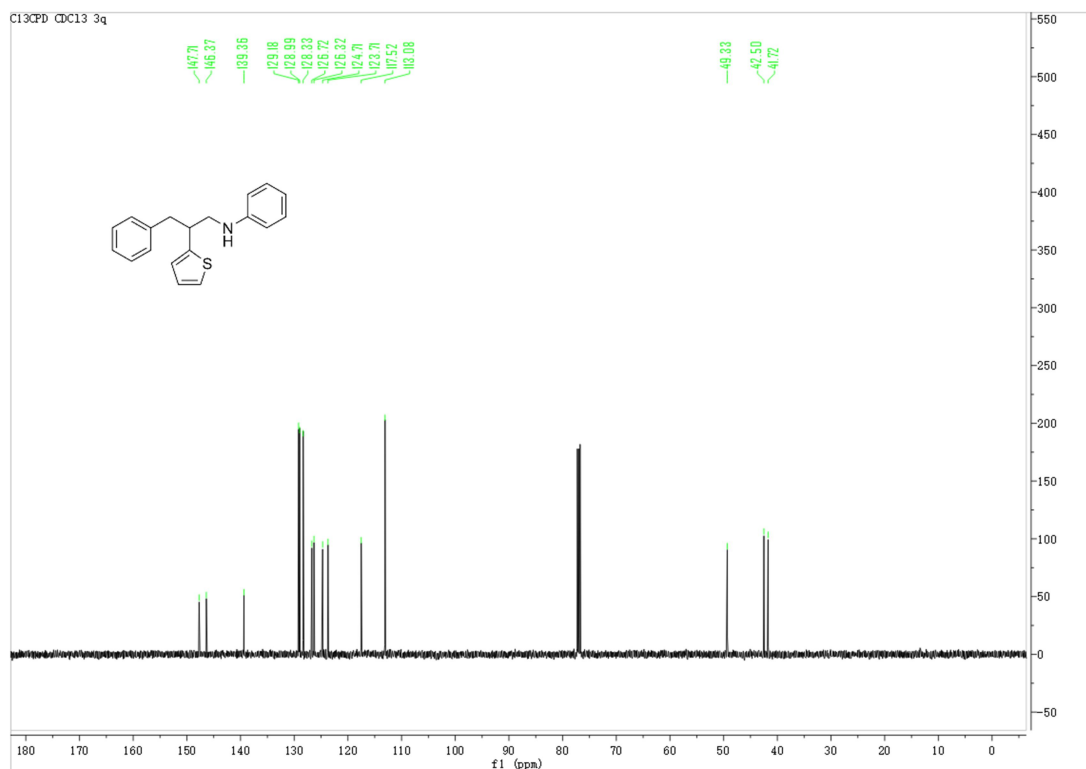

Supplementary Figure 143.  $^{13}\text{C}$  NMR spectrum of **3q** in  $\text{CDCl}_3$ .

00118 #20 RT: 0.27 AV: 1 NL: 4.36E8  
T: FTMS + p ESI Full ms [100.00-1000.00]

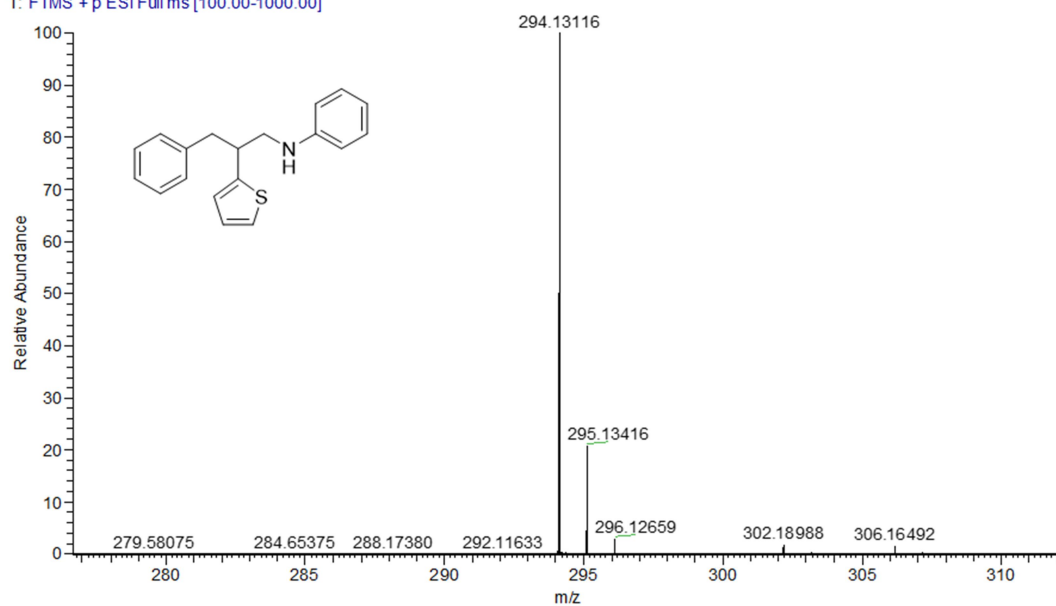

Supplementary Figure 144. HRMS of **3q**.

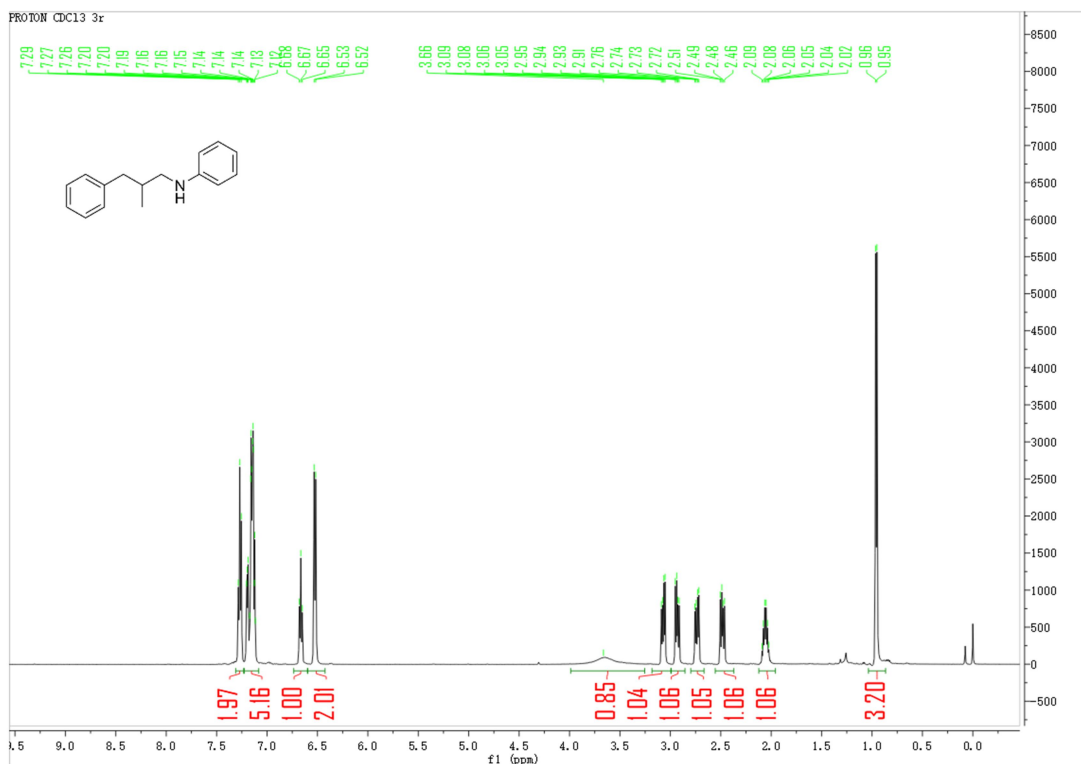

Supplementary Figure 145.  $^1\text{H}$  NMR spectrum of 3r in  $\text{CDCl}_3$ .

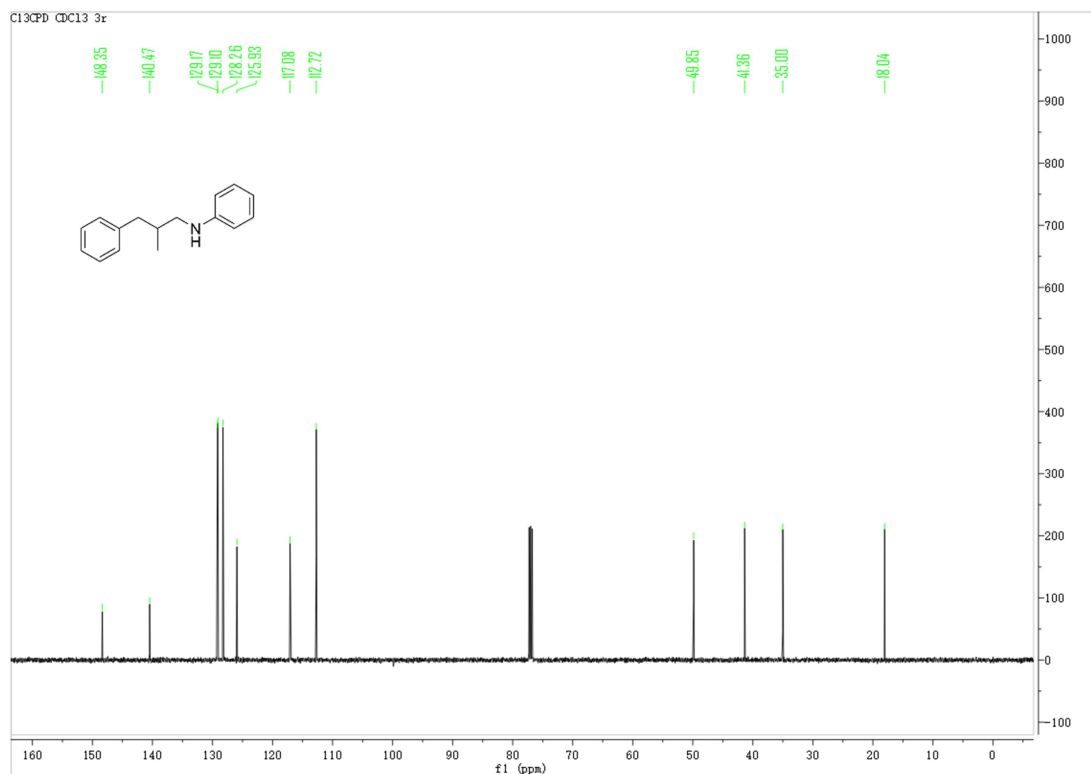

Supplementary Figure 146.  $^{13}\text{C}$  NMR spectrum of 3r in  $\text{CDCl}_3$ .

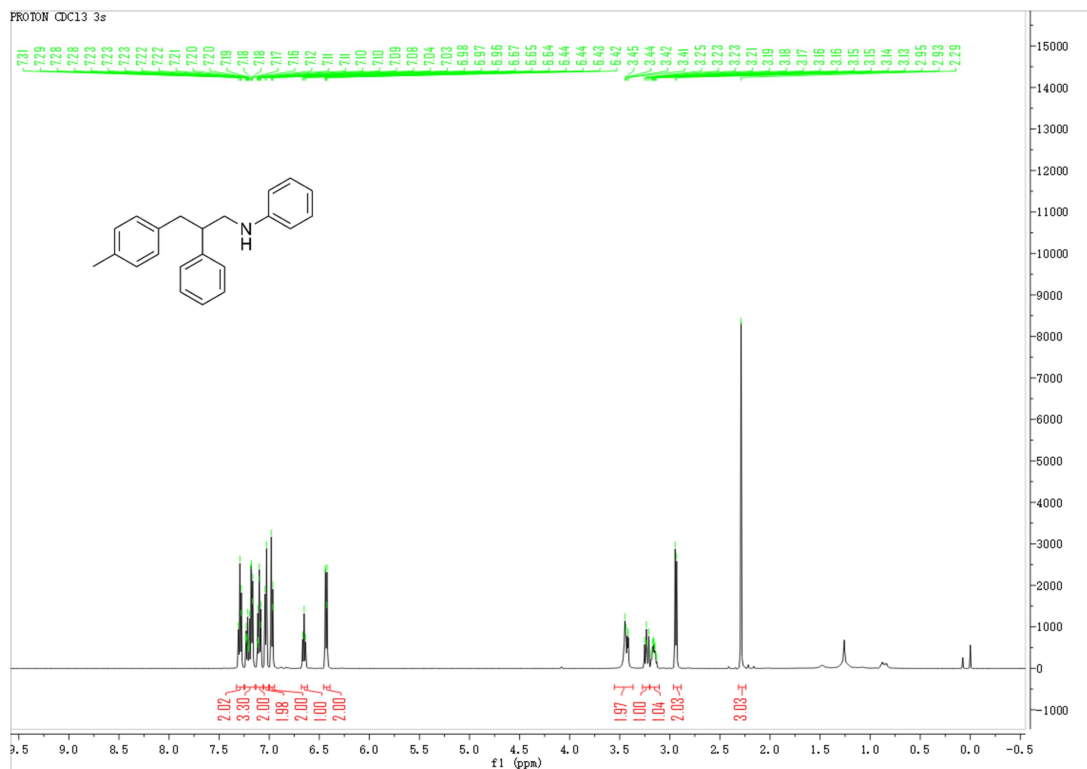

Supplementary Figure 147.  $^1\text{H}$  NMR spectrum of **3s** in  $\text{CDCl}_3$ .

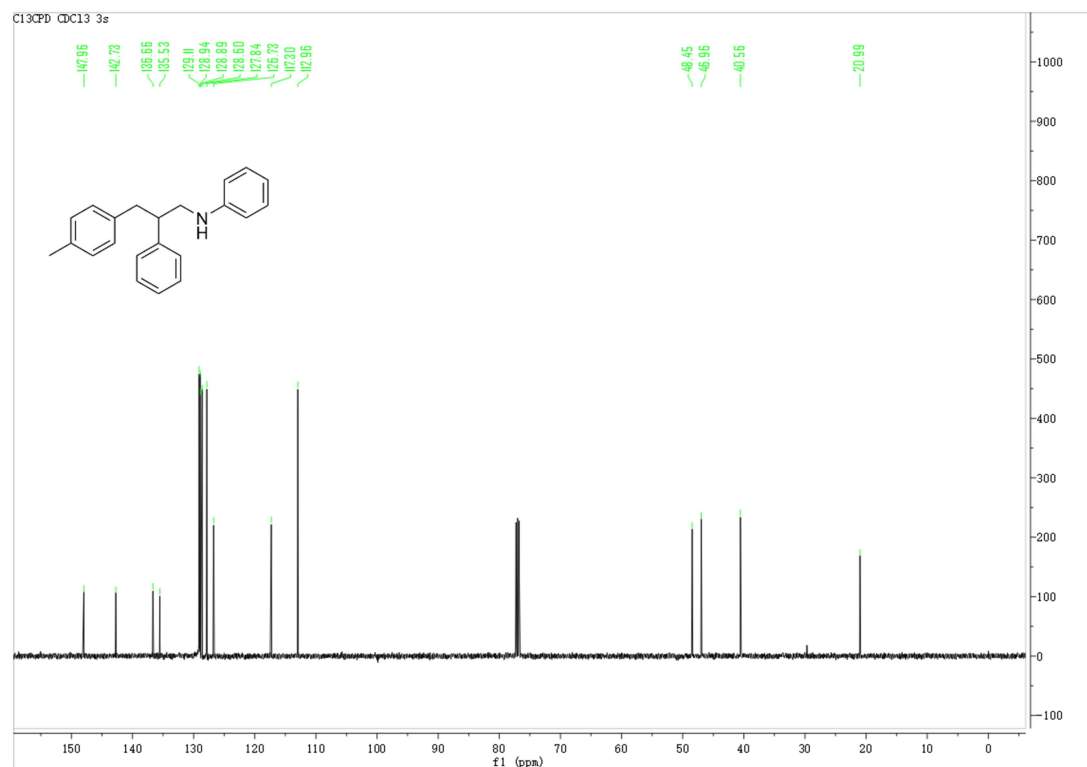

Supplementary Figure 148.  $^{13}\text{C}$  NMR spectrum of **3s** in  $\text{CDCl}_3$ .

00122 #27 RT: 0.37 AV: 1 NL: 4.33E8  
T: FTMS + p ESI Full ms [100.00-1000.00]

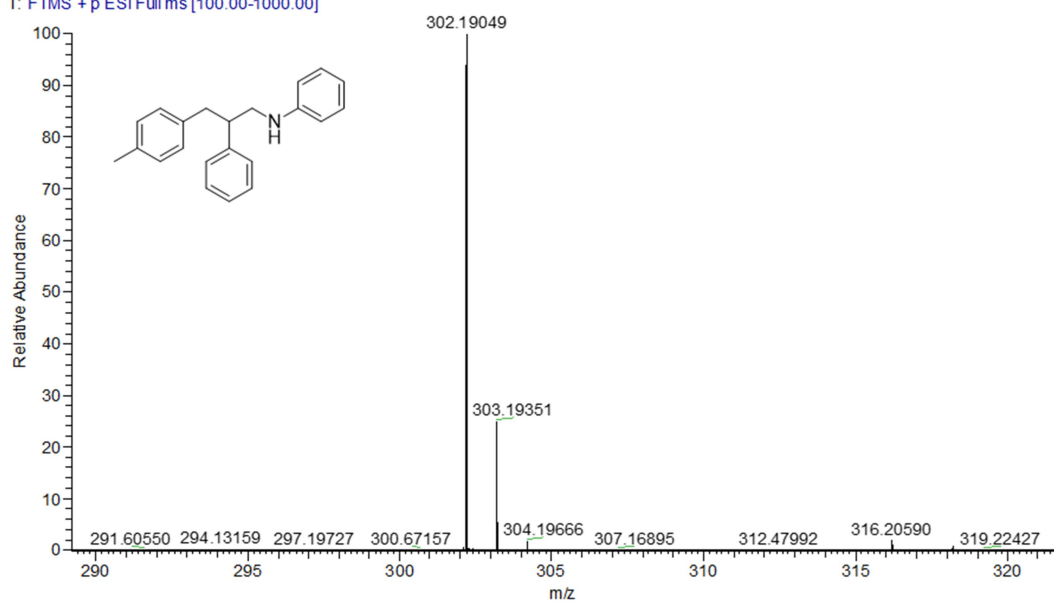

Supplementary Figure 149. HRMS of 3s.

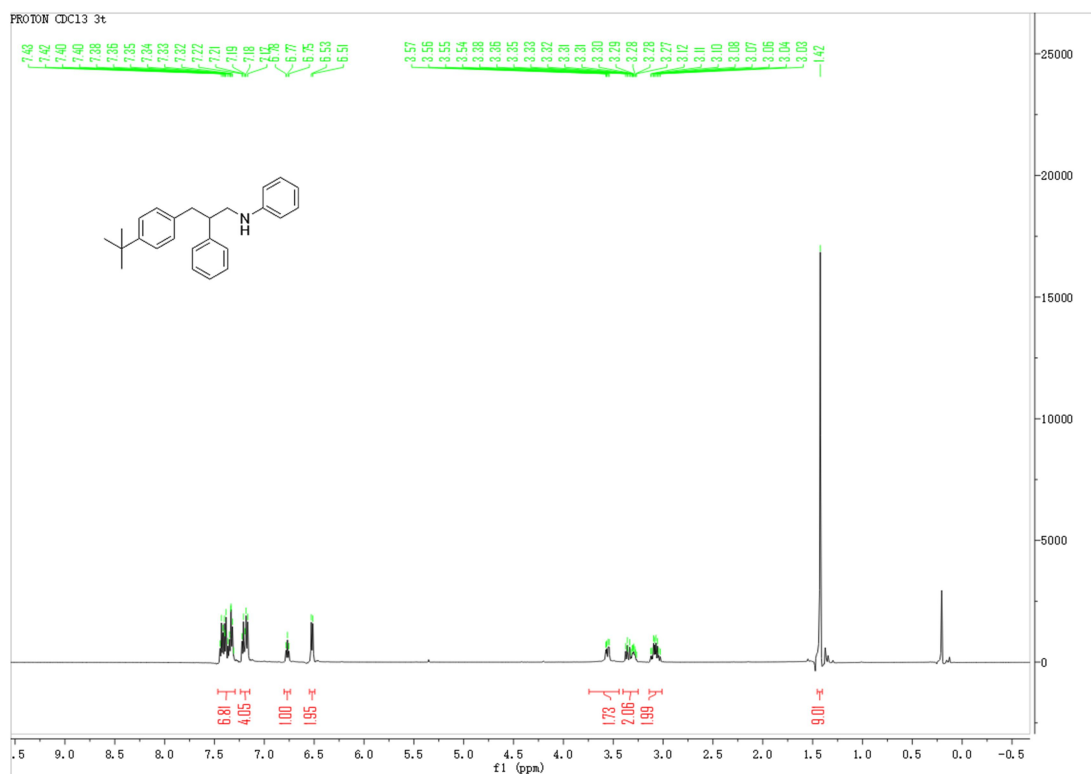

Supplementary Figure 150.  $^1\text{H}$  NMR spectrum of 3t in  $\text{CDCl}_3$ .

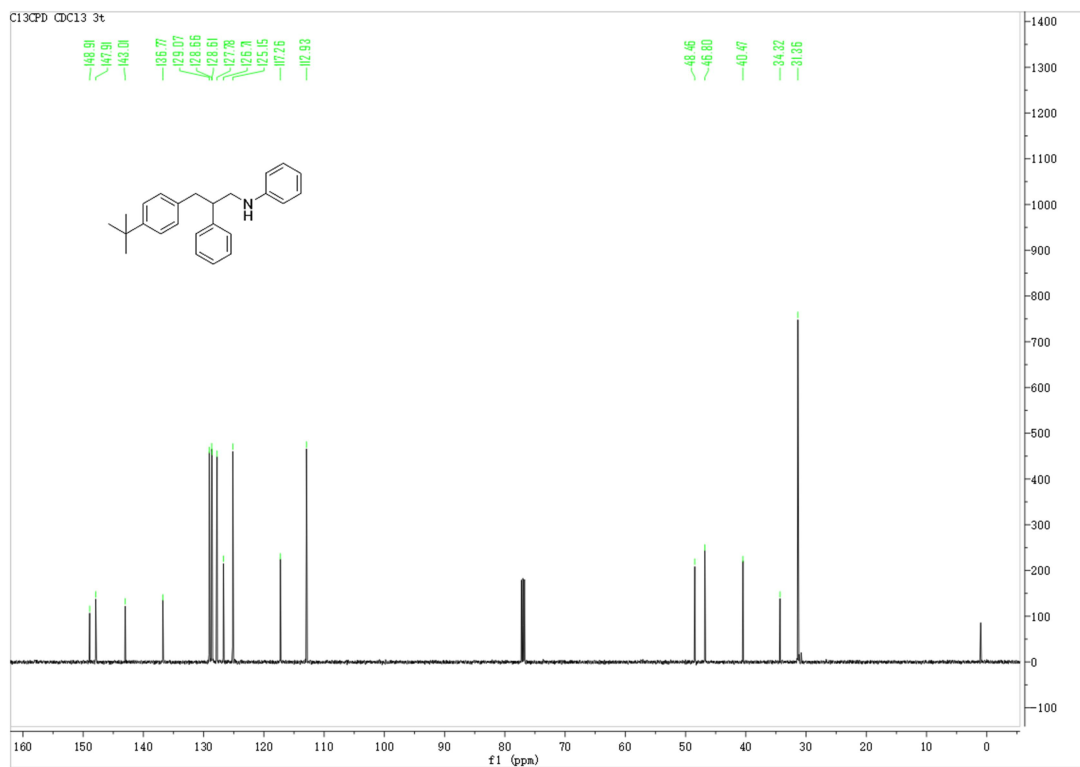

Supplementary Figure 151.  $^{13}\text{C}$  NMR spectrum of **3t** in  $\text{CDCl}_3$ .

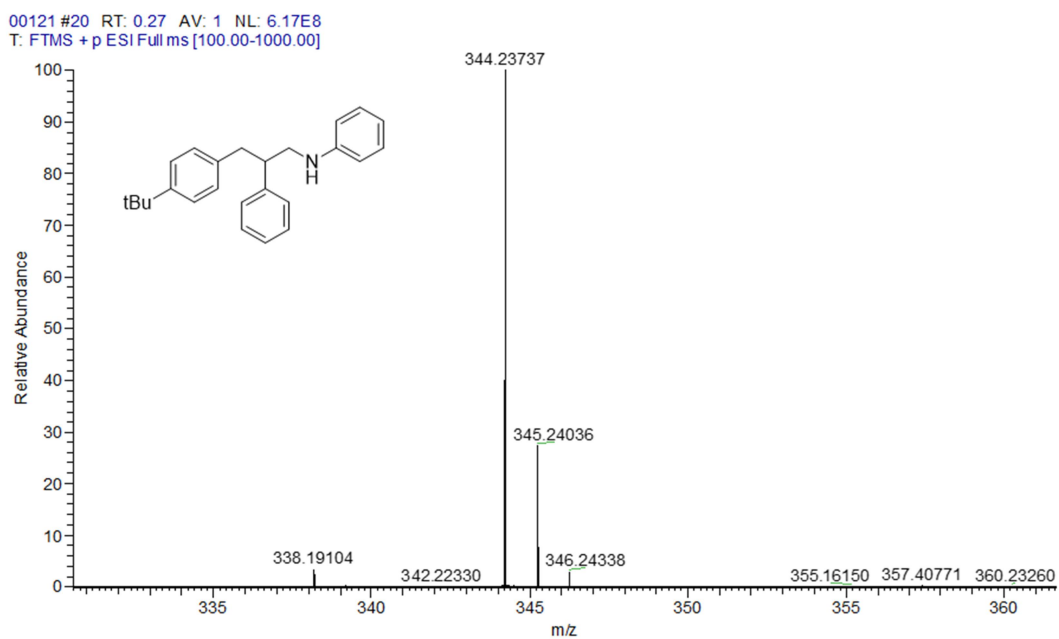

Supplementary Figure 152. HRMS of **3t**.

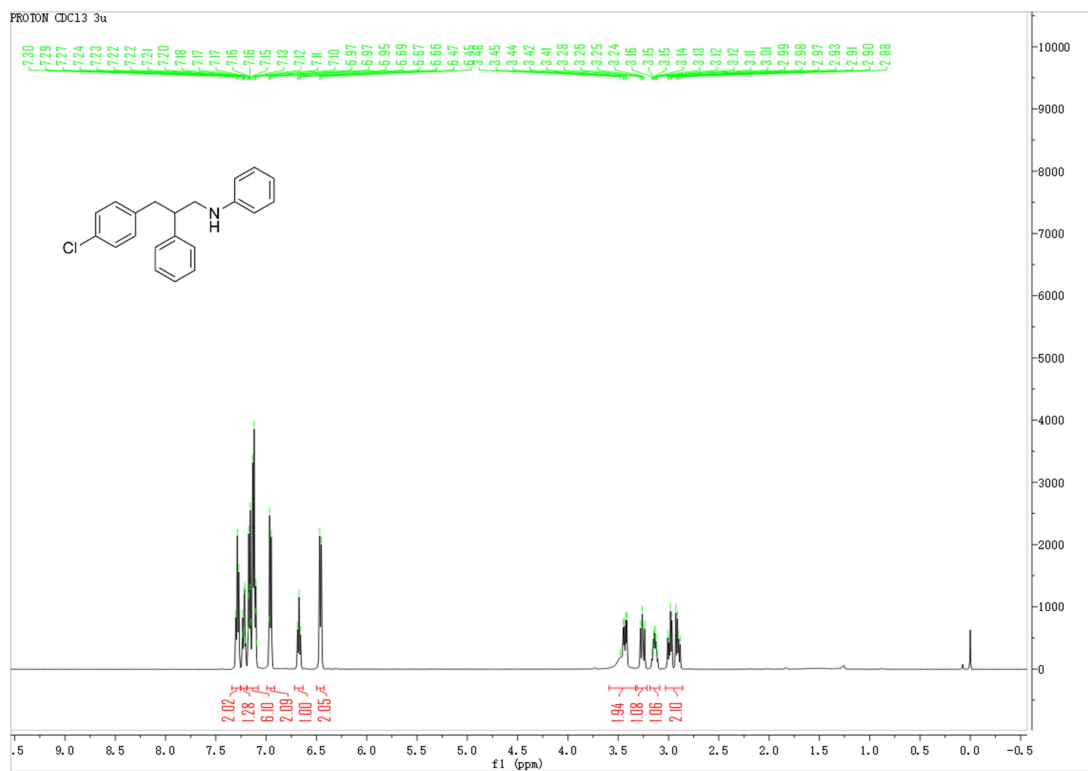

Supplementary Figure 153.  $^1\text{H}$  NMR spectrum of **3u** in  $\text{CDCl}_3$ .

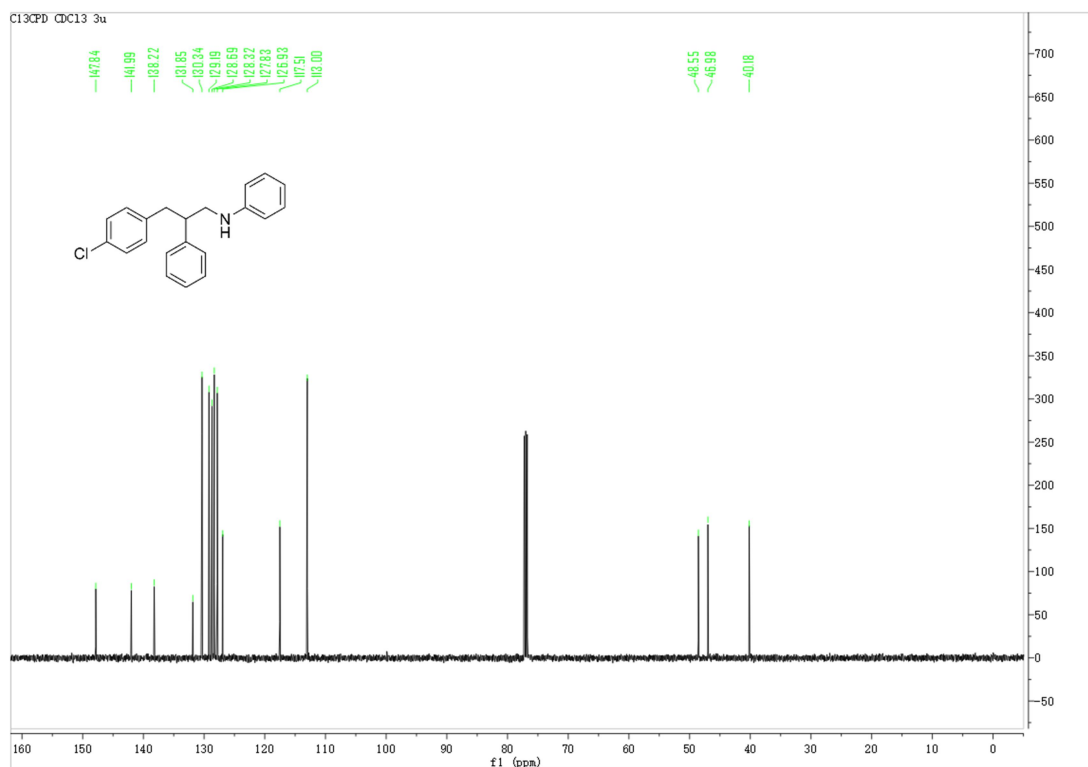

Supplementary Figure 154.  $^{13}\text{C}$  NMR spectrum of **3u** in  $\text{CDCl}_3$ .

00123 #21 RT: 0.28 AV: 1 NL: 2.43E8  
T: FTMS + p ESI Full ms [100.00-1000.00]

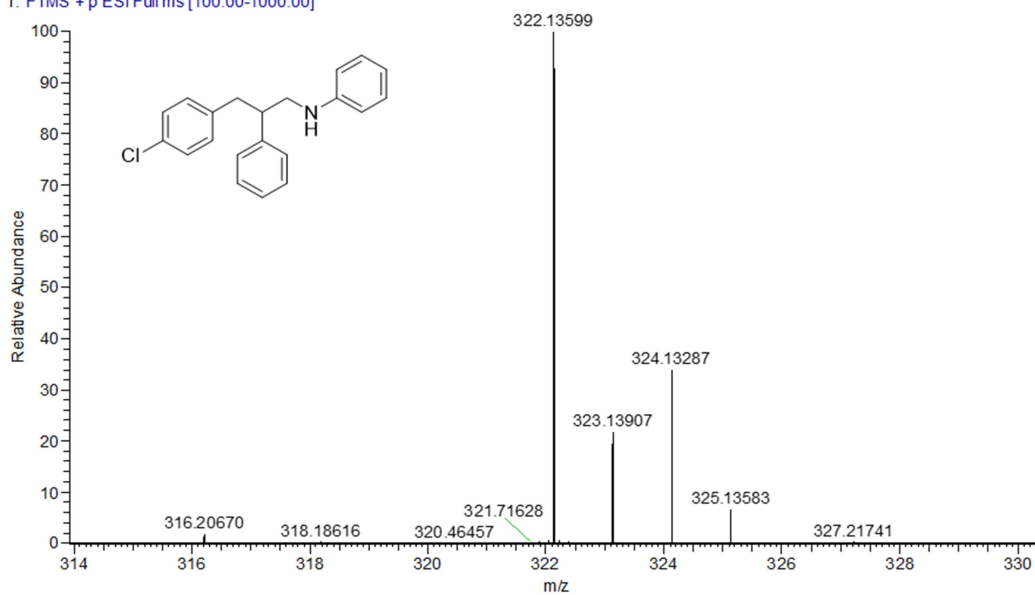

Supplementary Figure 155. HRMS of 3u.

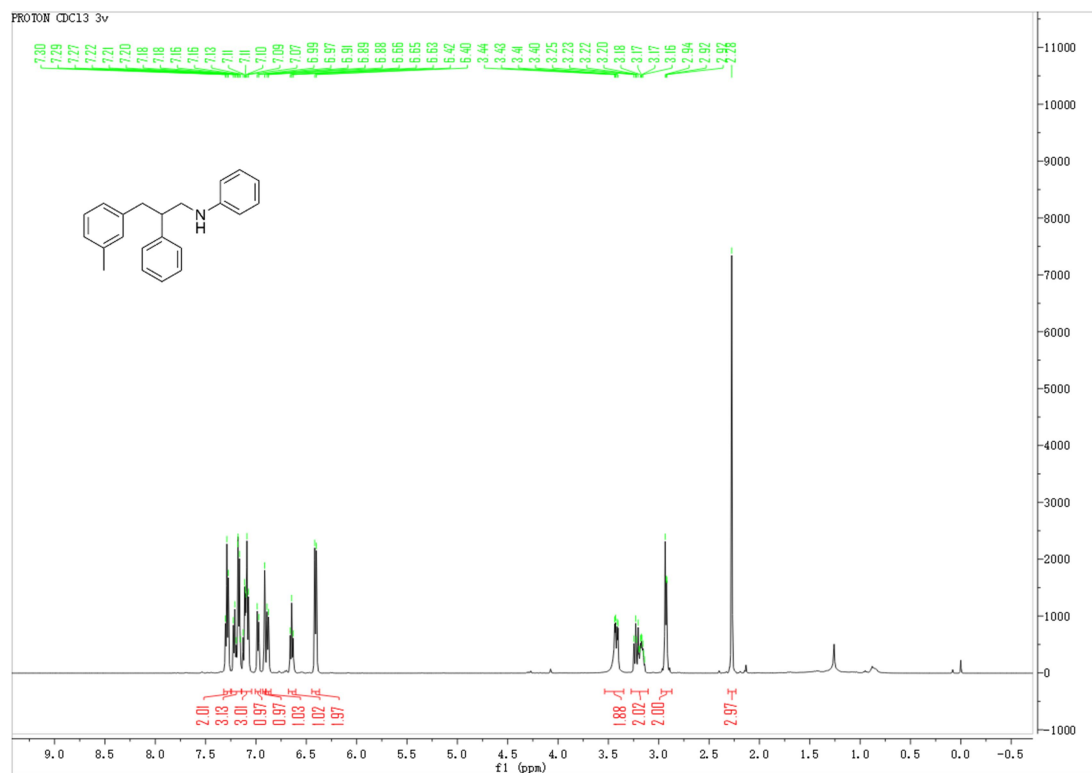

Supplementary Figure 156.  $^1\text{H}$  NMR spectrum of 3v in  $\text{CDCl}_3$ .

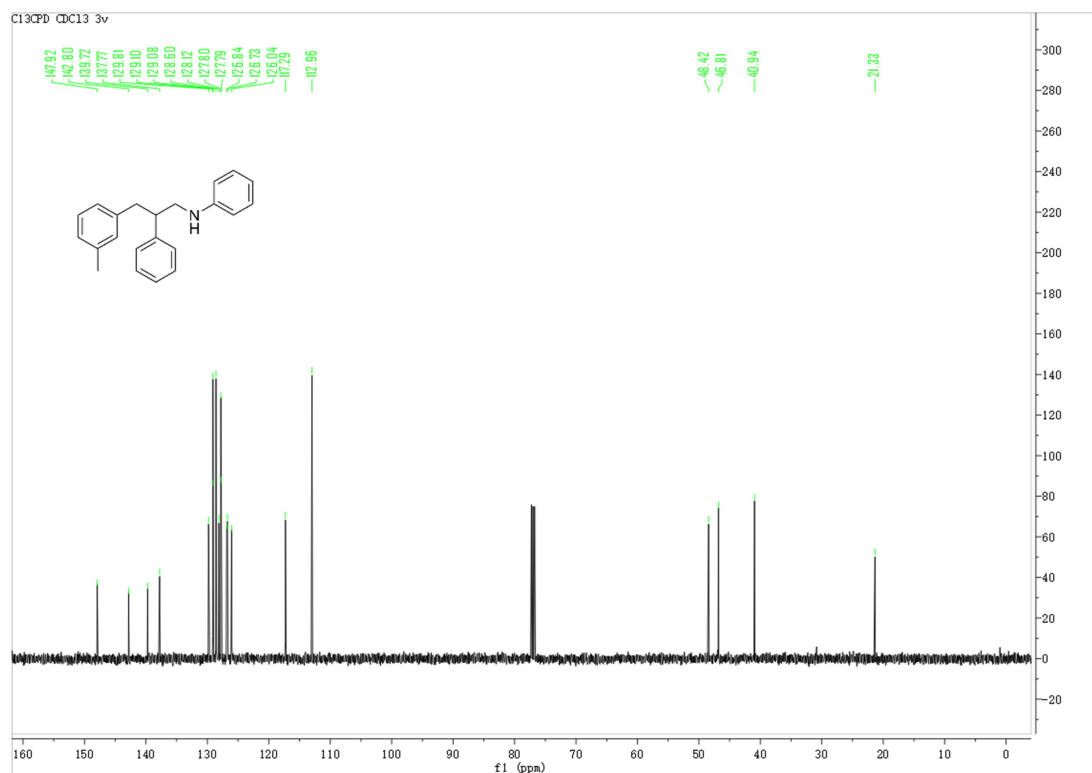

Supplementary Figure 157.  $^{13}\text{C}$  NMR spectrum of 3v in  $\text{CDCl}_3$ .

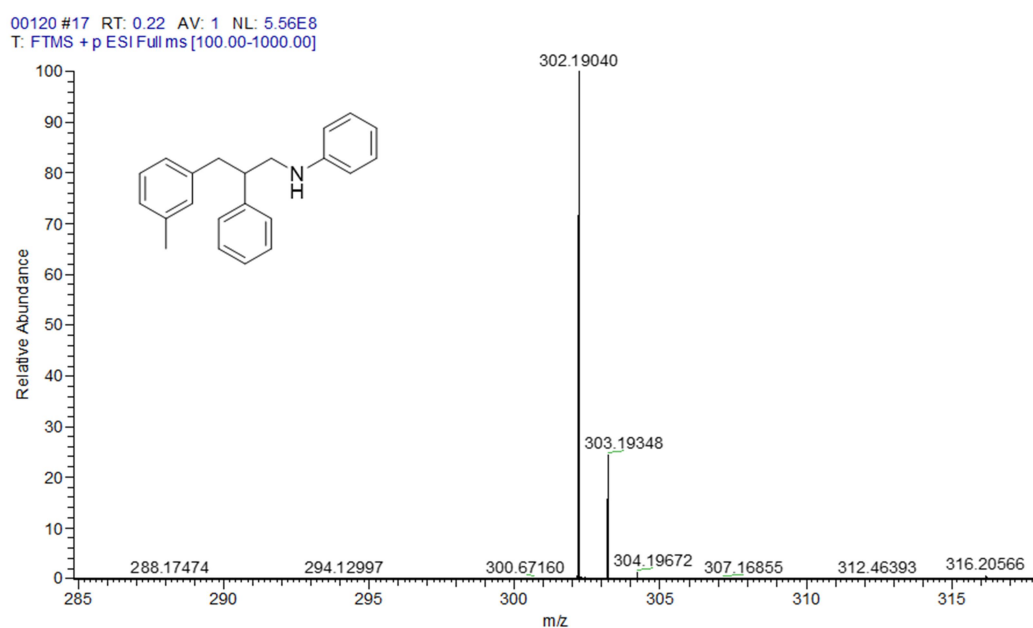

Supplementary Figure 158. HRMS of 3v.



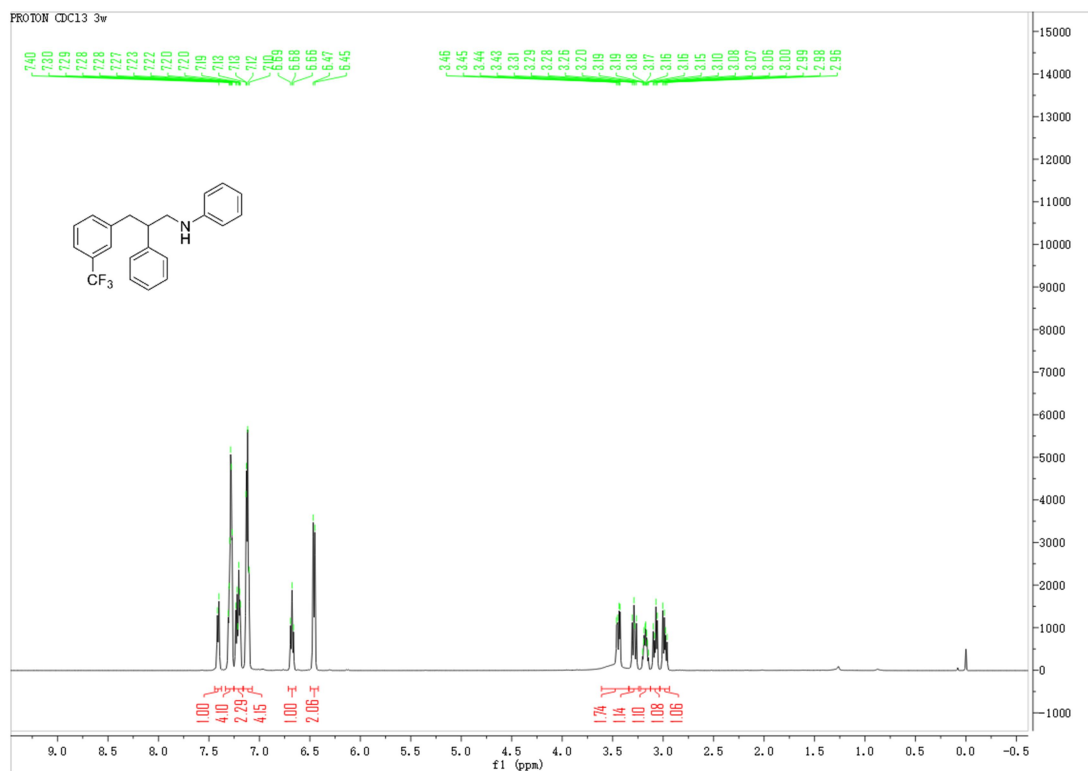

Supplementary Figure 159.  $^1\text{H}$  NMR spectrum of 3w in  $\text{CDCl}_3$ .

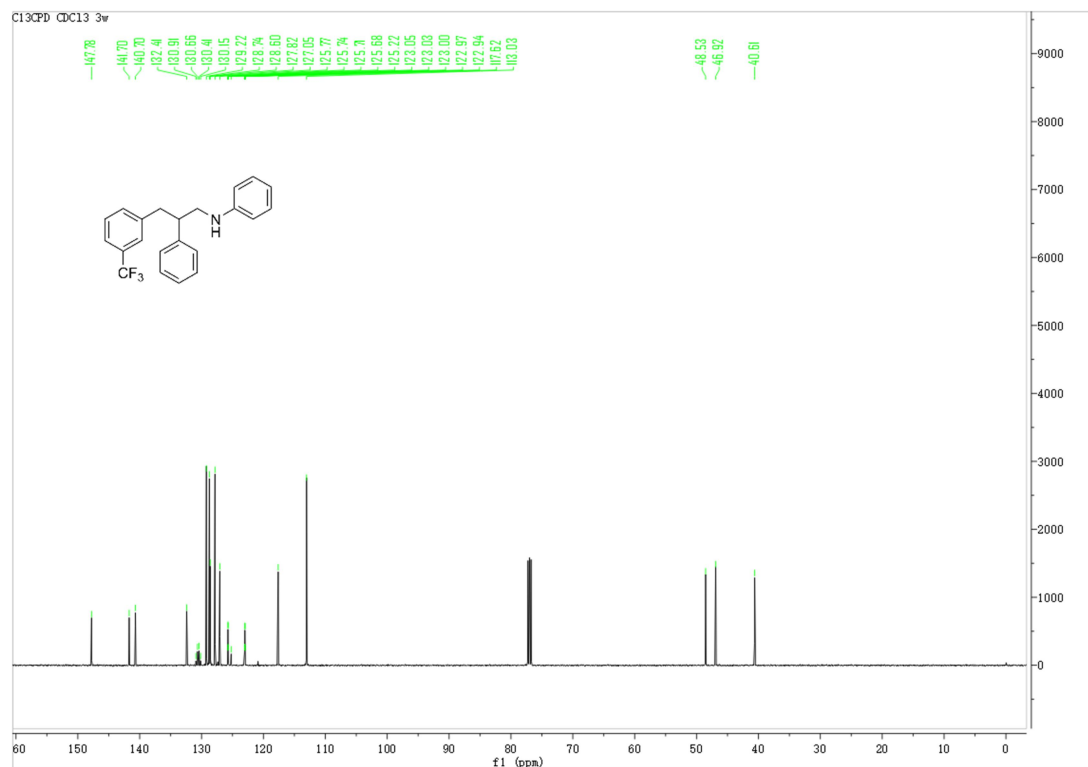

Supplementary Figure 160.  $^{13}\text{C}$  NMR spectrum of 3w in  $\text{CDCl}_3$ .

00119 #16 RT: 0.21 AV: 1 NL: 2.29E8  
T: FTMS + p ESI Full ms [100.00-1000.00]

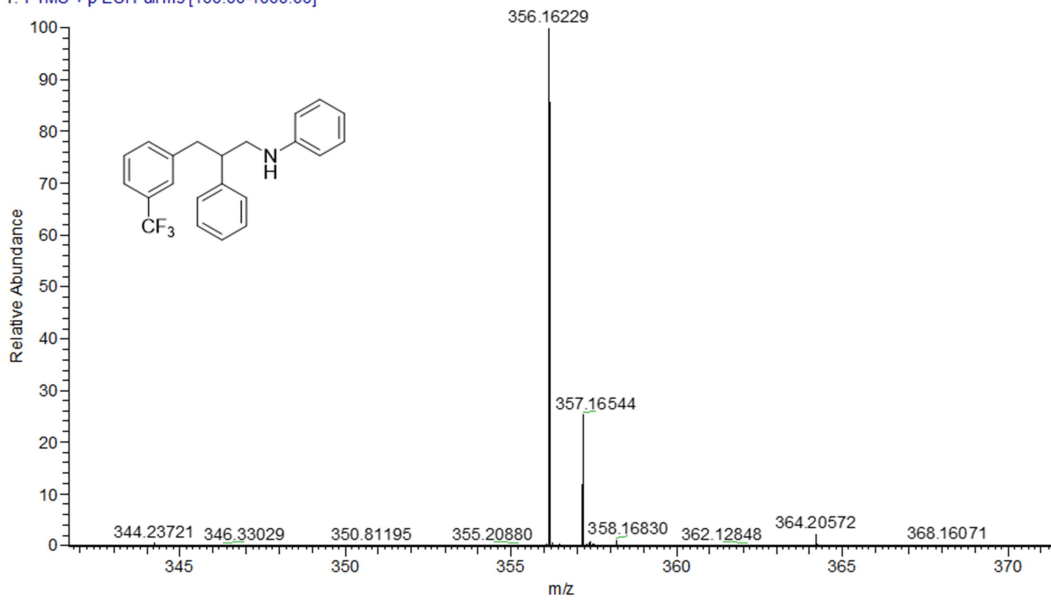

Supplementary Figure 161. HRMS of 3w.

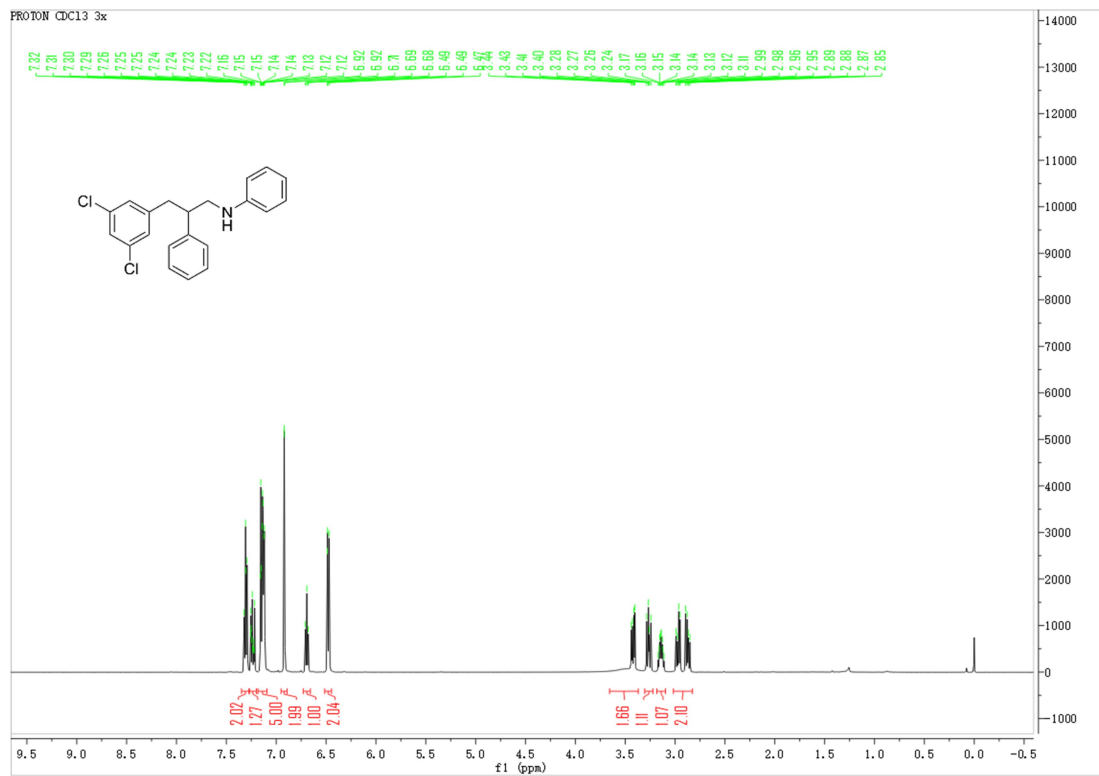

Supplementary Figure 162.  $^1\text{H}$  NMR spectrum of 3x in  $\text{CDCl}_3$ .

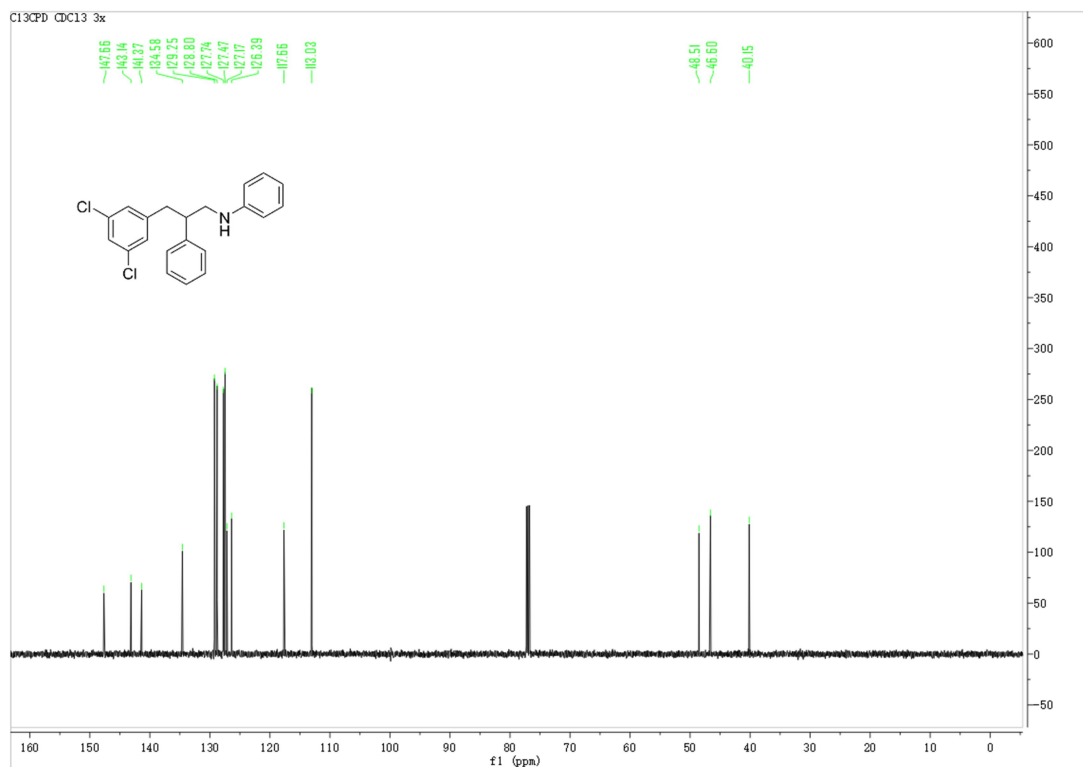

Supplementary Figure 163.  $^{13}\text{C}$  NMR spectrum of **3x** in  $\text{CDCl}_3$ .

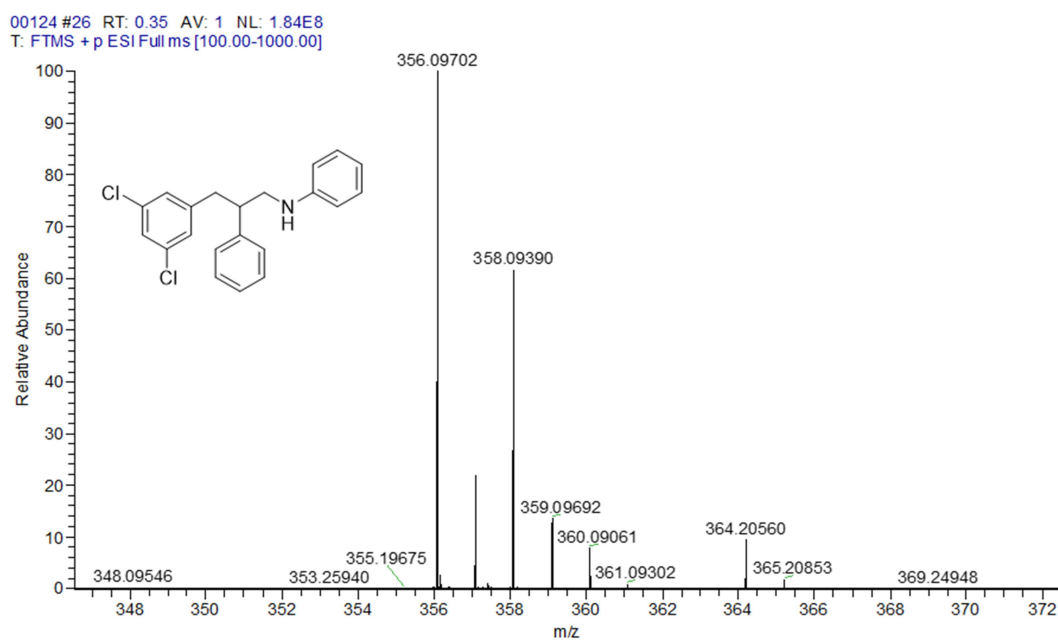

Supplementary Figure 164. HRMS of **3x**.

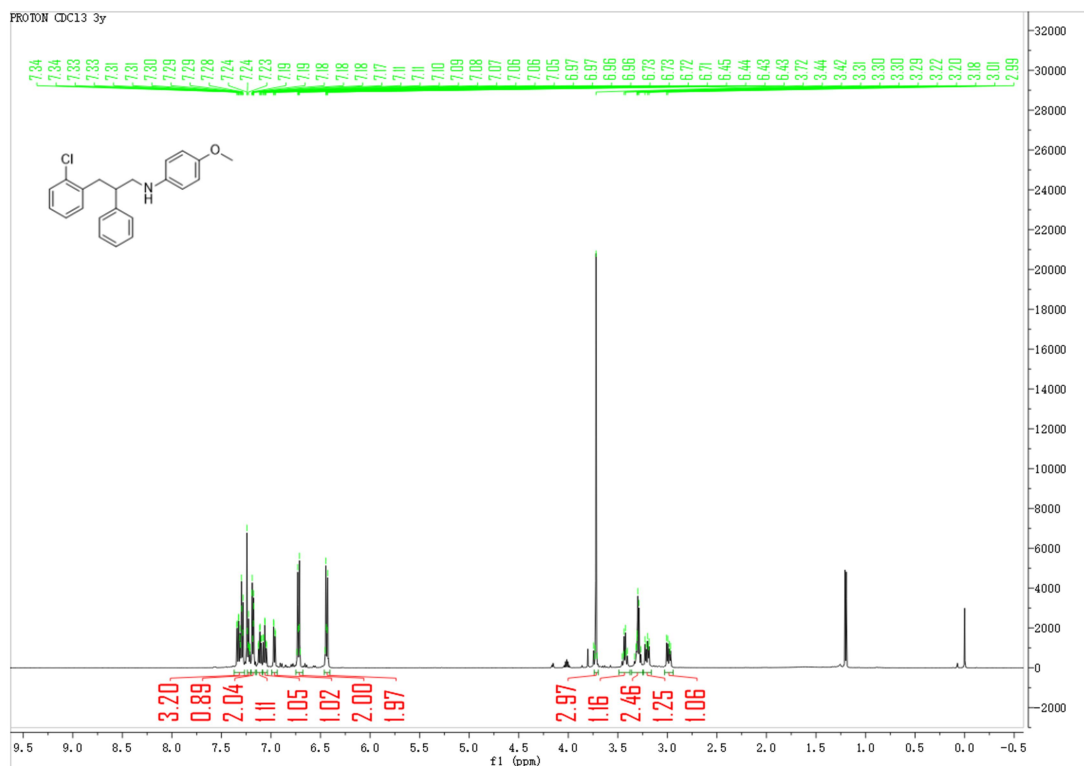

Supplementary Figure 165.  $^1\text{H}$  NMR spectrum of 3y in  $\text{CDCl}_3$ .

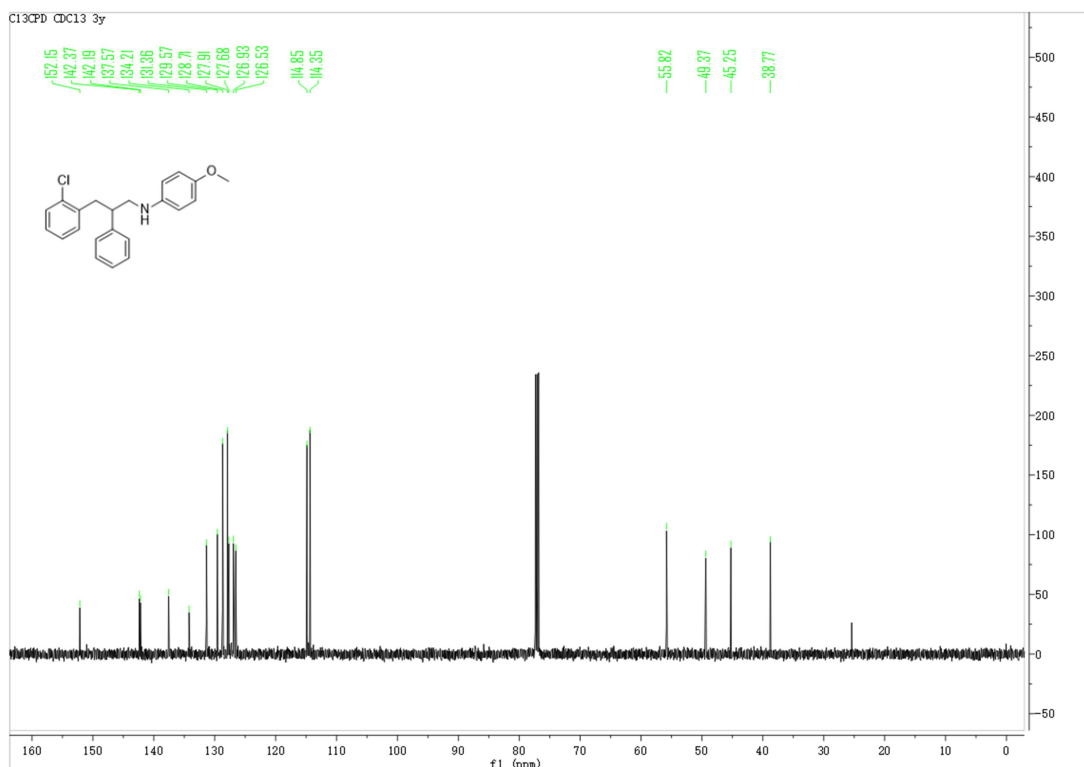

Supplementary Figure 166.  $^{13}\text{C}$  NMR spectrum of 3y in  $\text{CDCl}_3$ .

00137 #18 RT: 0.24 AV: 1 NL: 3.54E8  
T: FTMS + p ESI Full ms [100.00-1000.00]

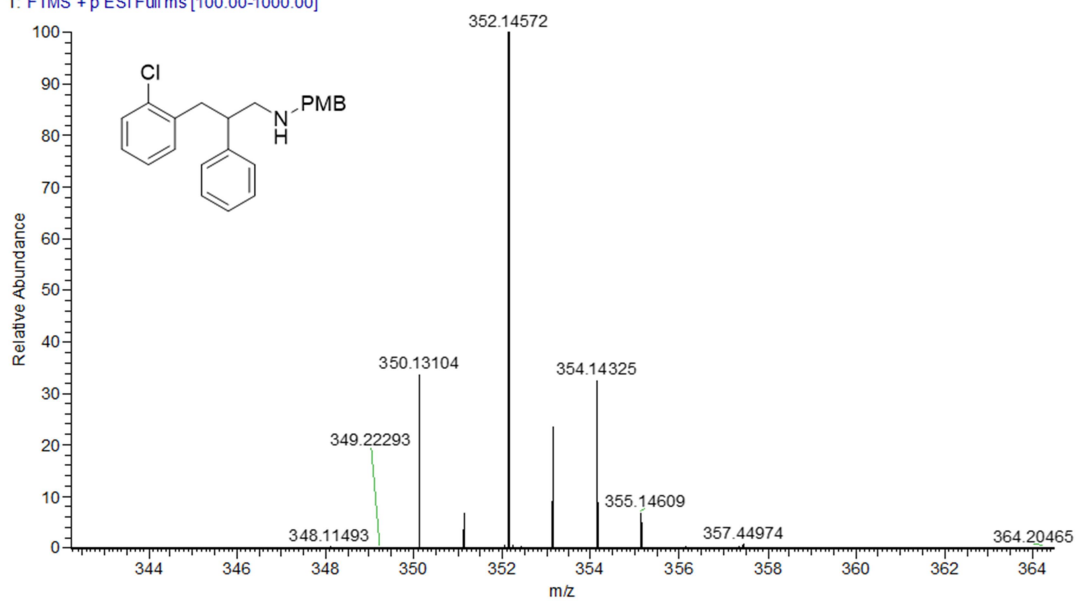

Supplementary Figure 167. HRMS of **3y**.

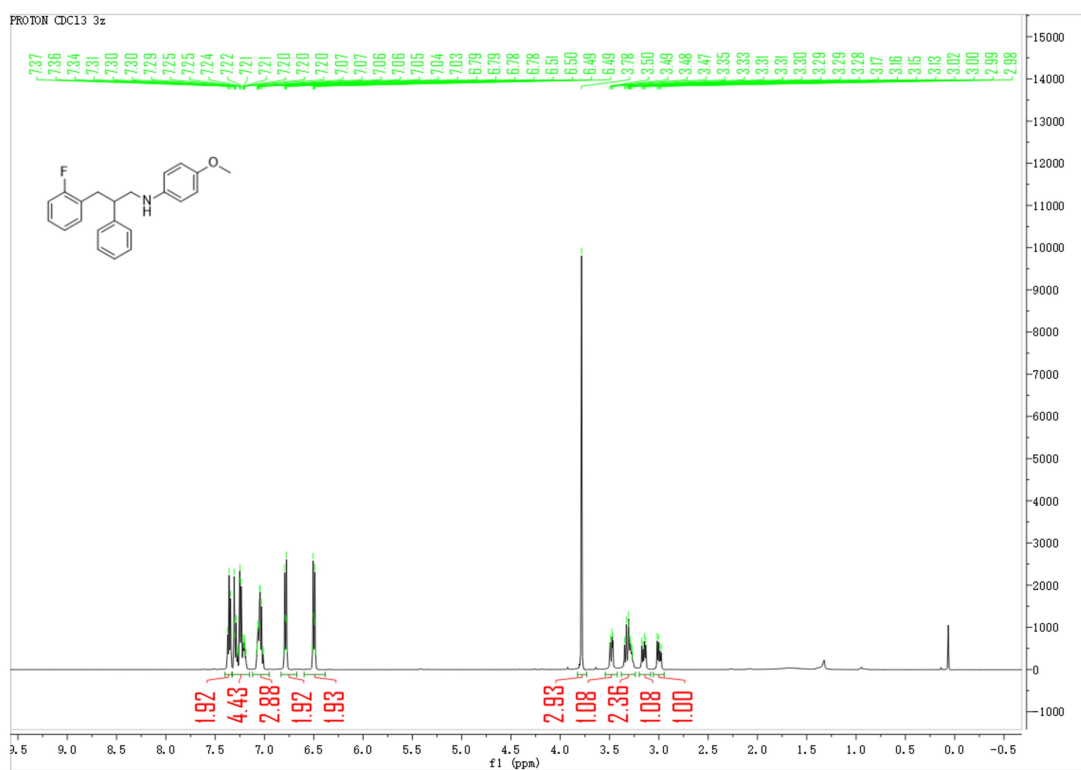

Supplementary Figure 168. <sup>1</sup>H NMR spectrum of **3z** in CDCl<sub>3</sub>.

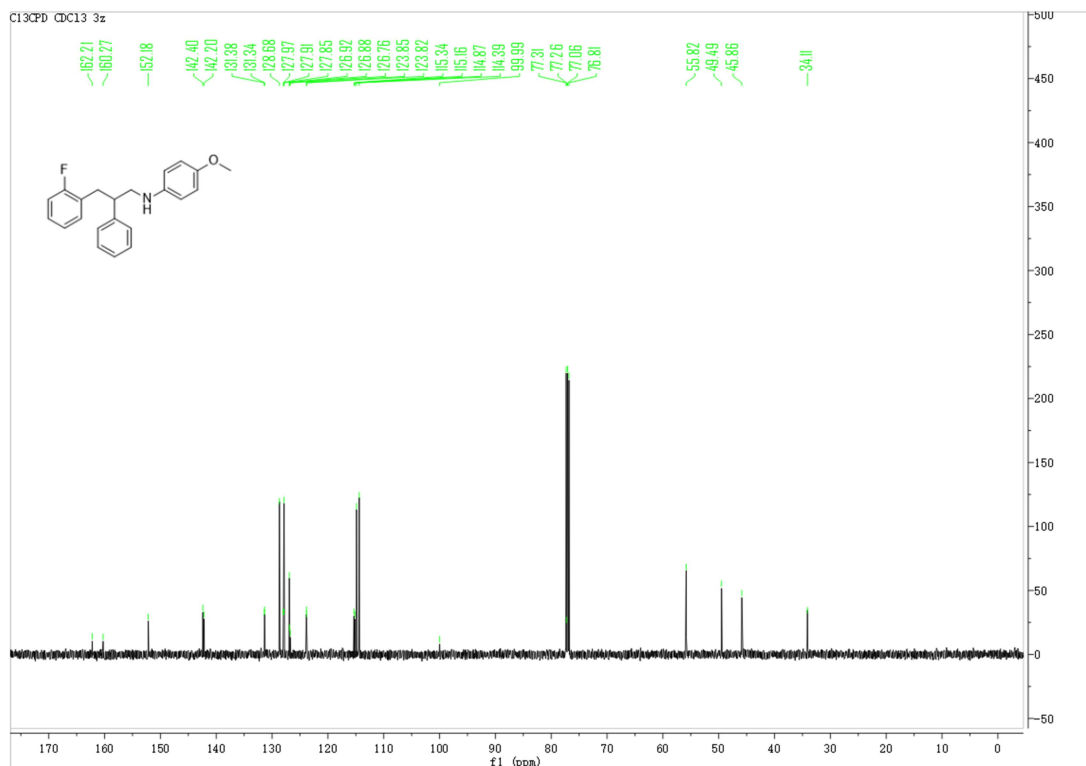

Supplementary Figure 169.  $^{13}\text{C}$  NMR spectrum of **3z** in  $\text{CDCl}_3$ .

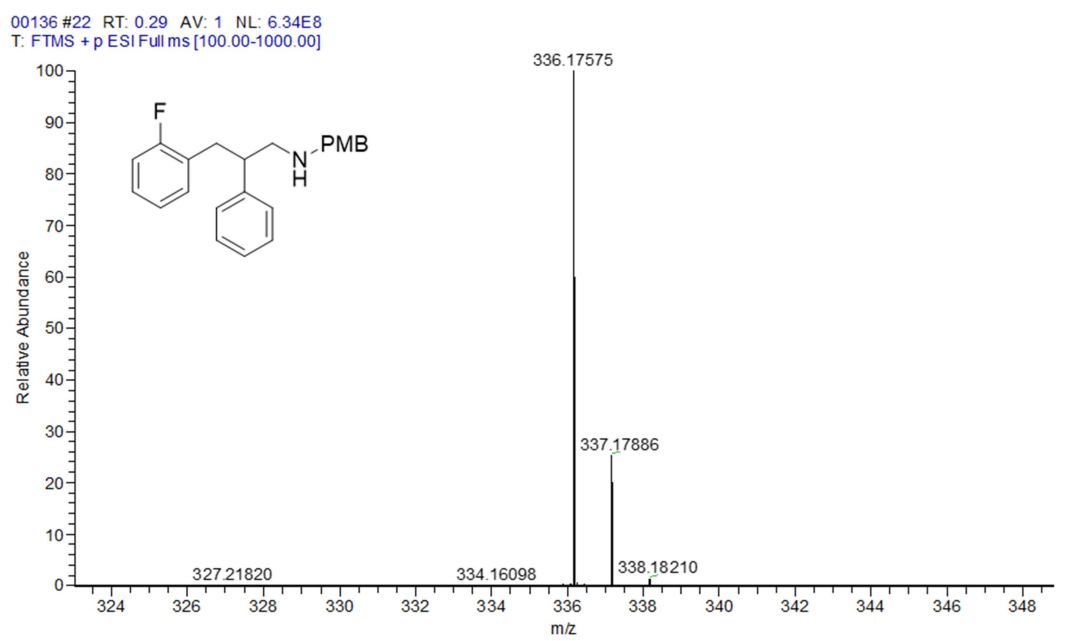

Supplementary Figure 170. HRMS of **3z**.

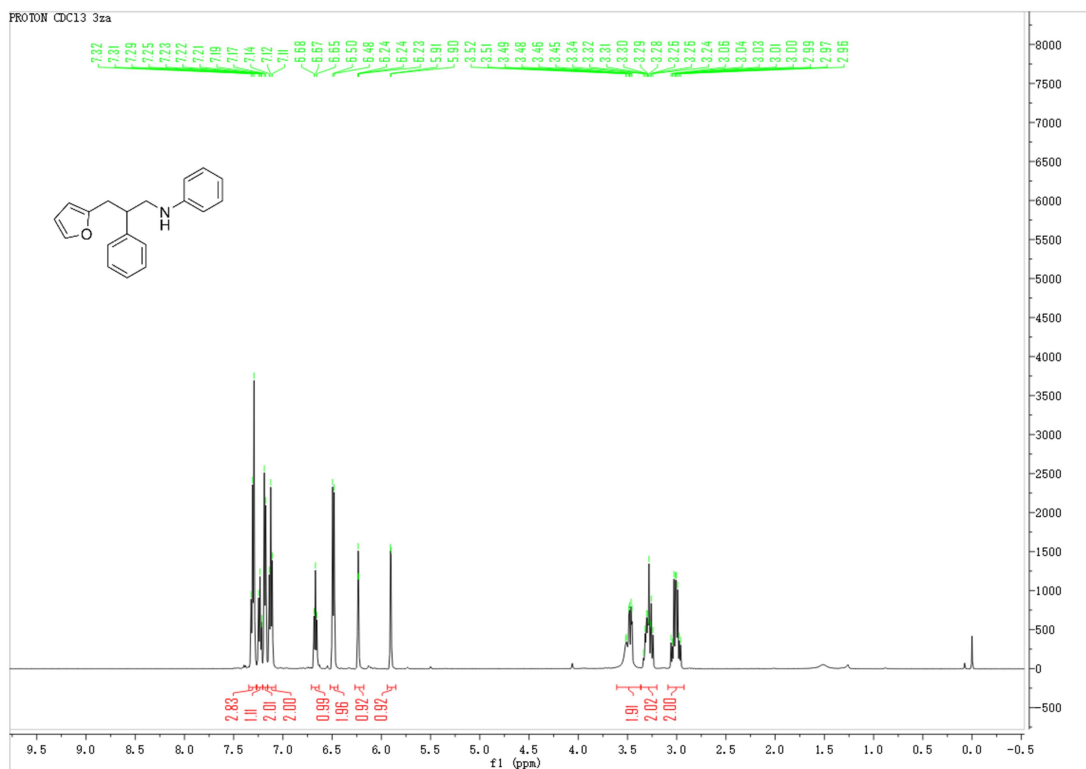

Supplementary Figure 171.  $^1\text{H}$  NMR spectrum of **3za** in  $\text{CDCl}_3$ .

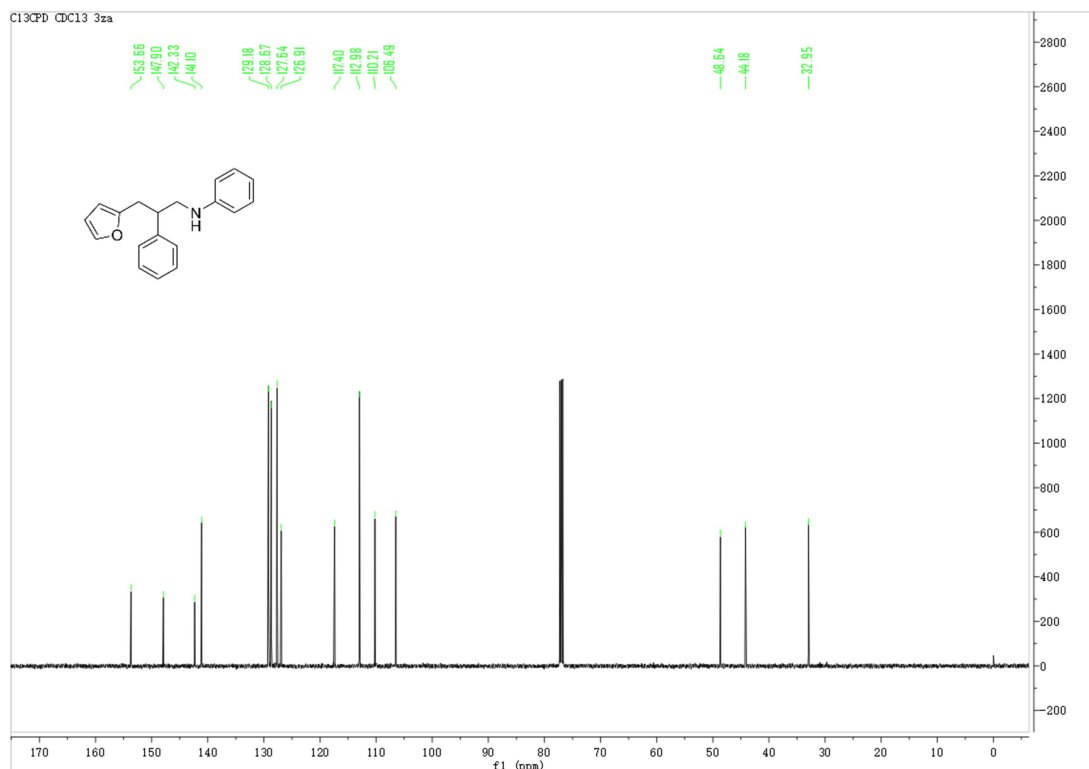

Supplementary Figure 172.  $^{13}\text{C}$  NMR spectrum of **3za** in  $\text{CDCl}_3$ .

00125 #28 RT: 0.38 AV: 1 NL: 3.88E8  
T: FTMS + p ESI Full ms [100.00-1000.00]

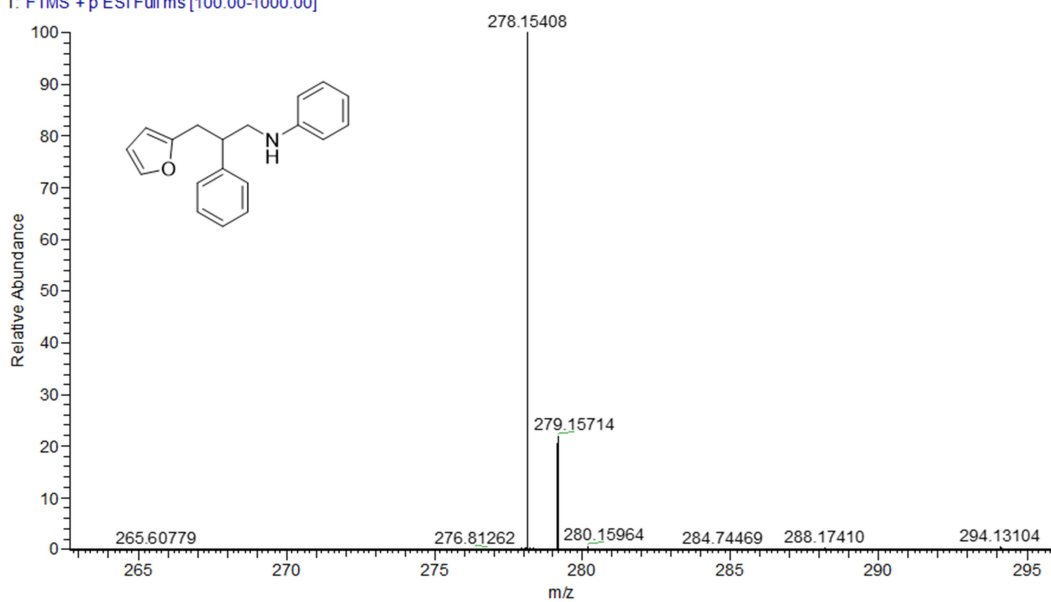

Supplementary Figure 173. HRMS of 3za.

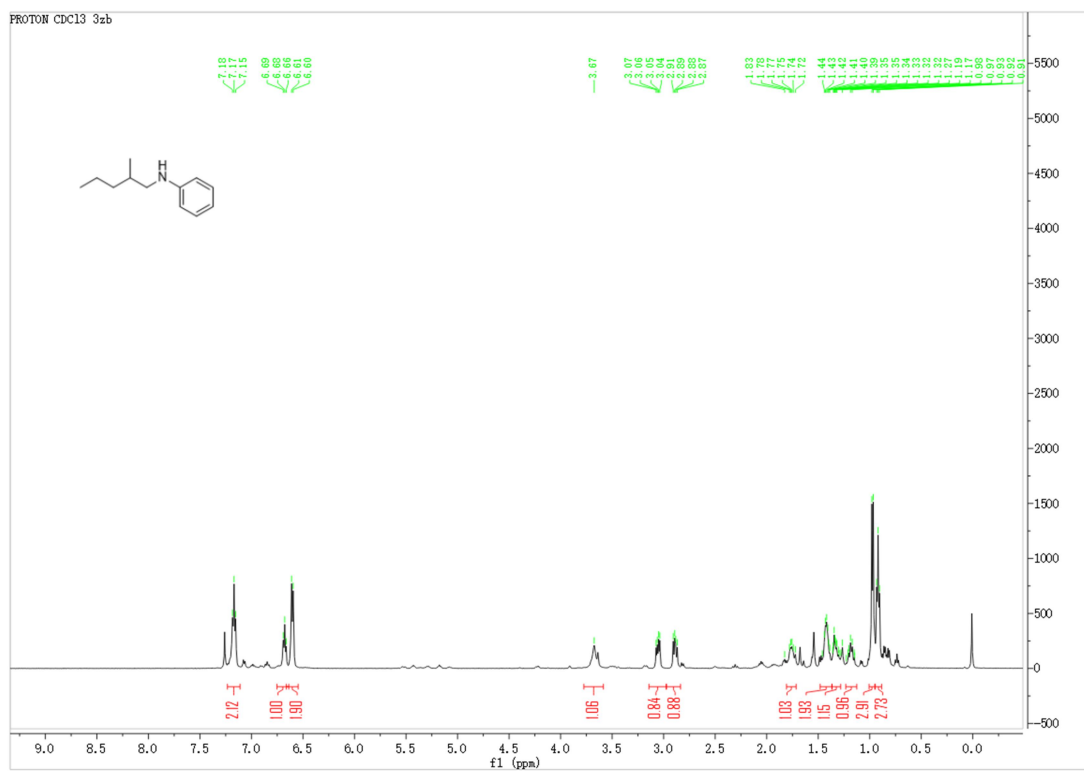

Supplementary Figure 174. <sup>1</sup>H NMR spectrum of 3zb in CDCl<sub>3</sub>.



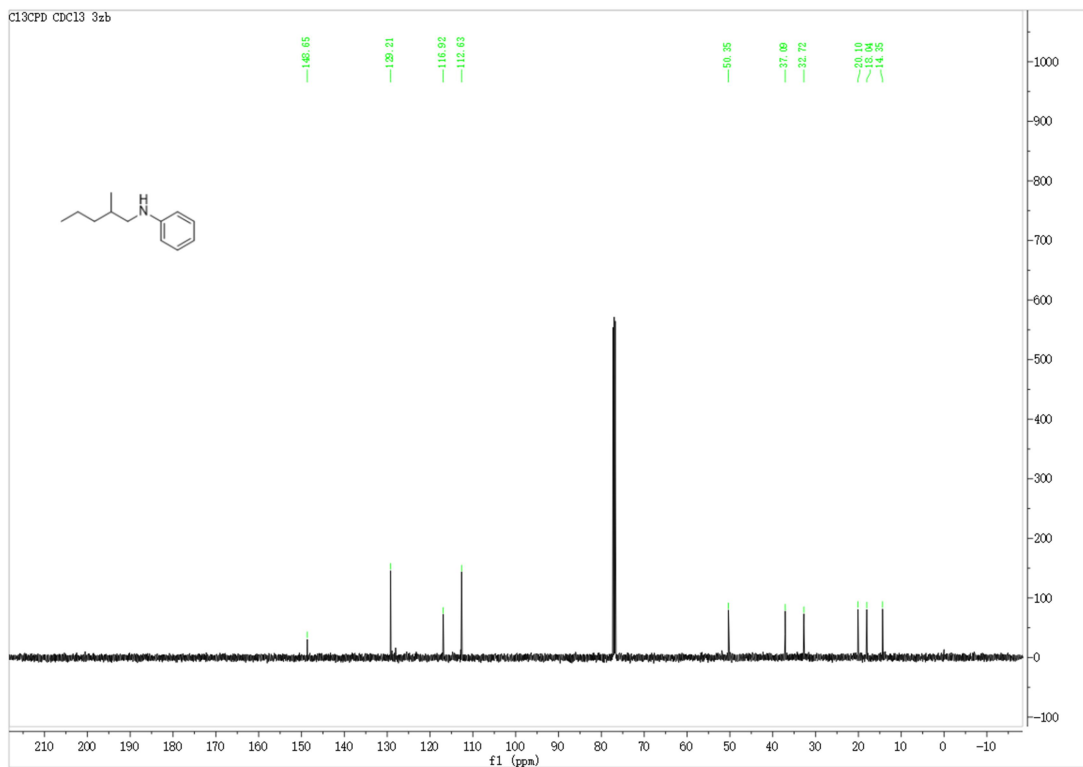

Supplementary Figure 175.  $^{13}\text{C}$  NMR spectrum of **3zb** in  $\text{CDCl}_3$ .

00204 #16 RT: 0.23 AV: 1 NL: 2.03E6  
T: FTMS + p ESI Full ms [100.00-1000.00]

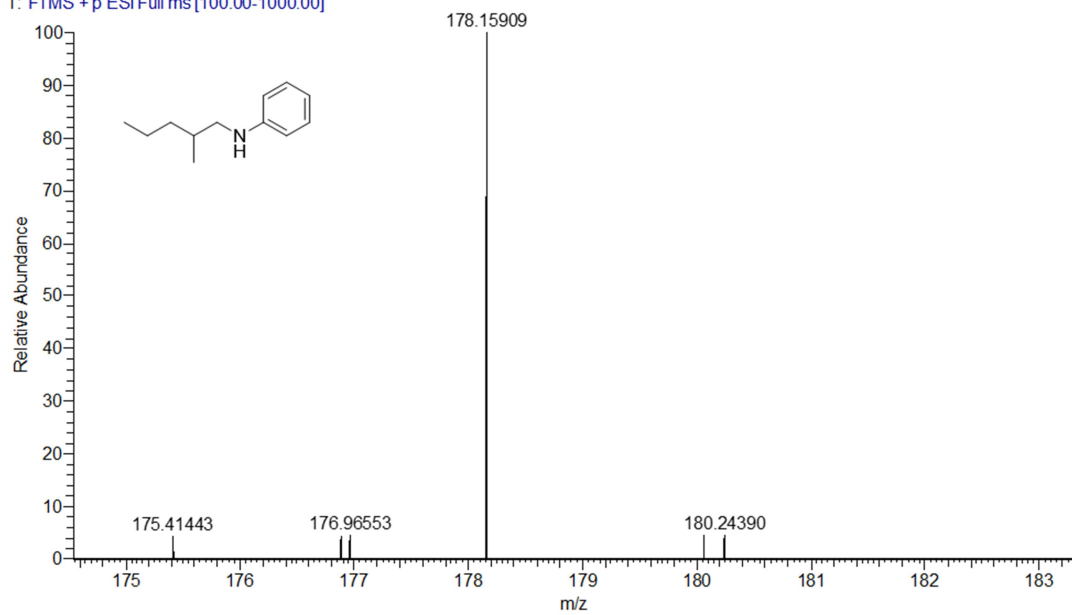

Supplementary Figure 176. HRMS of **3zb**.

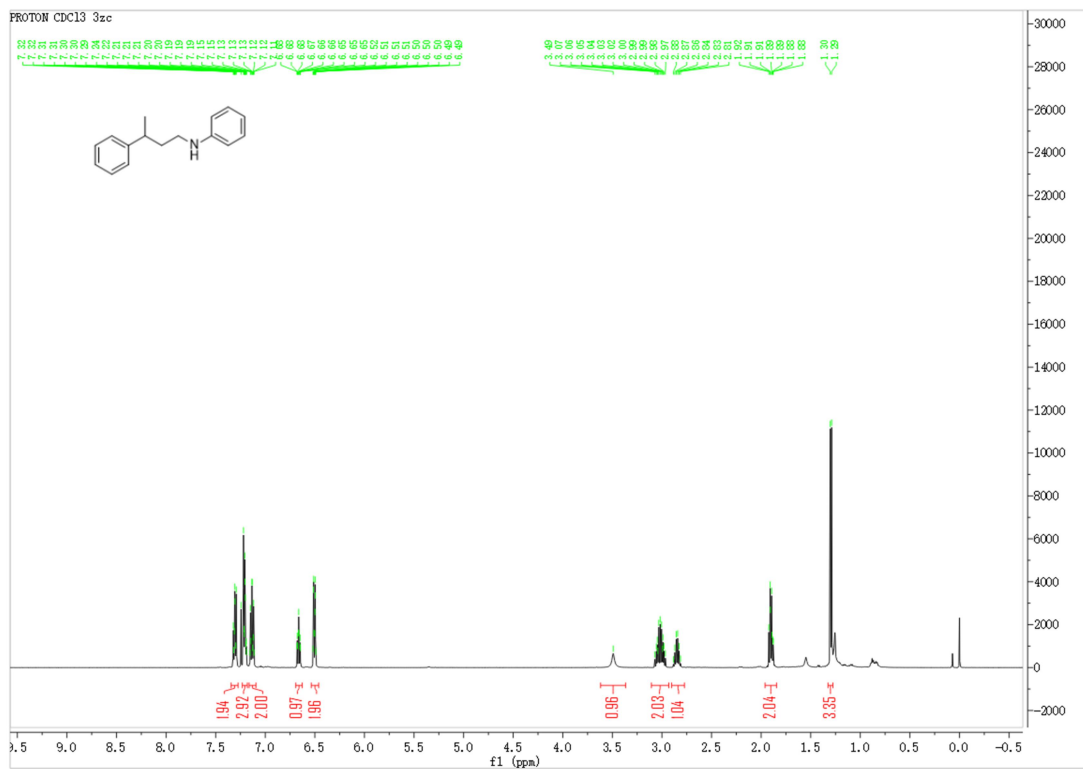

Supplementary Figure 177.  $^1\text{H}$  NMR spectrum of **3zc** in  $\text{CDCl}_3$ .

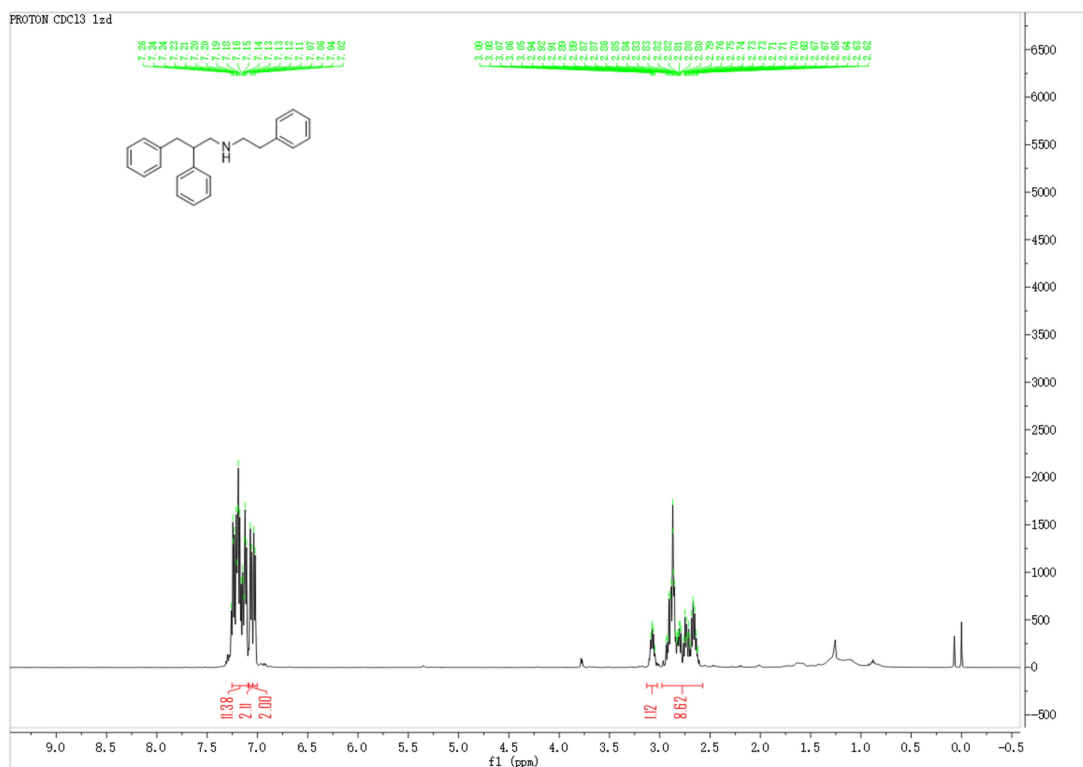

Supplementary Figure 178.  $^1\text{H}$  NMR spectrum of **3zd** in  $\text{CDCl}_3$ .

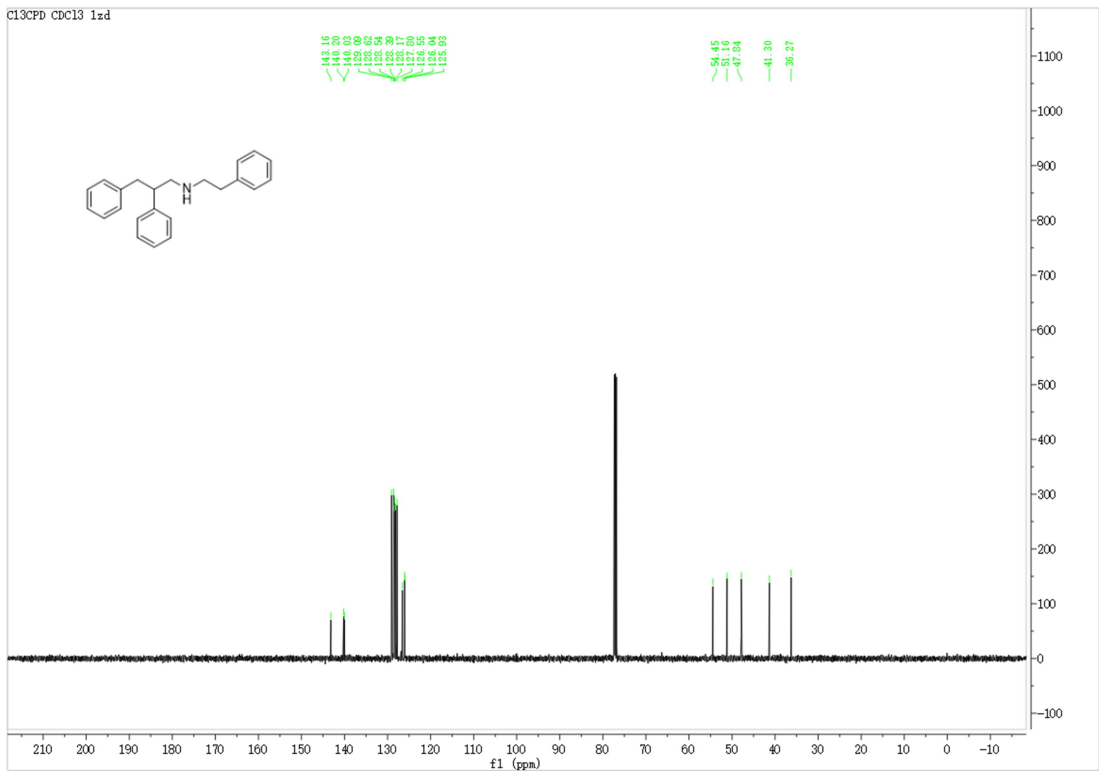

Supplementary Figure 179.  $^{13}\text{C}$  NMR spectrum of **3zd** in  $\text{CDCl}_3$ .

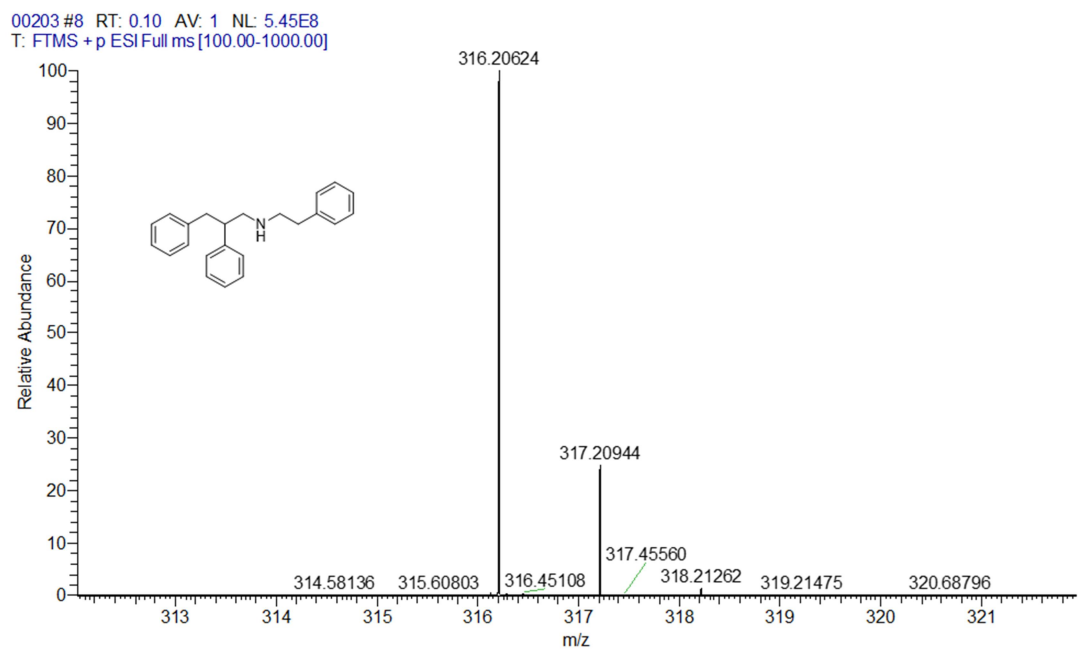

Supplementary Figure 180. HRMS of **3zd**.

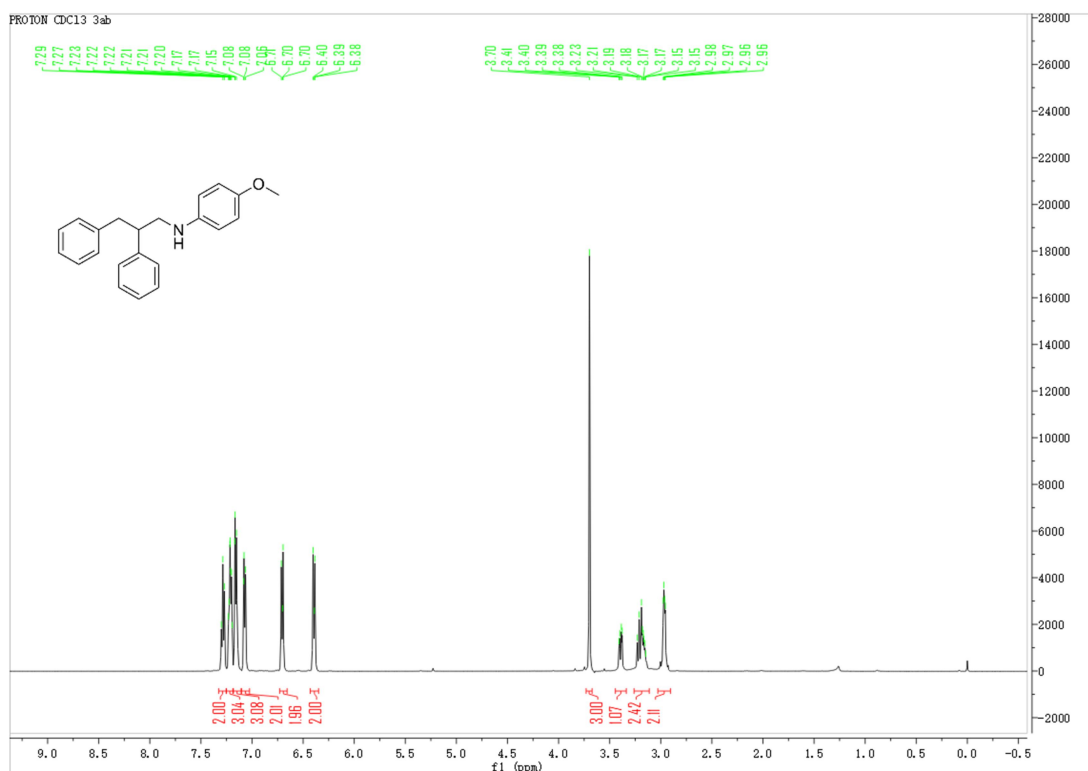

Supplementary Figure 181.  $^1\text{H}$  NMR spectrum of **3ab** in  $\text{CDCl}_3$ .

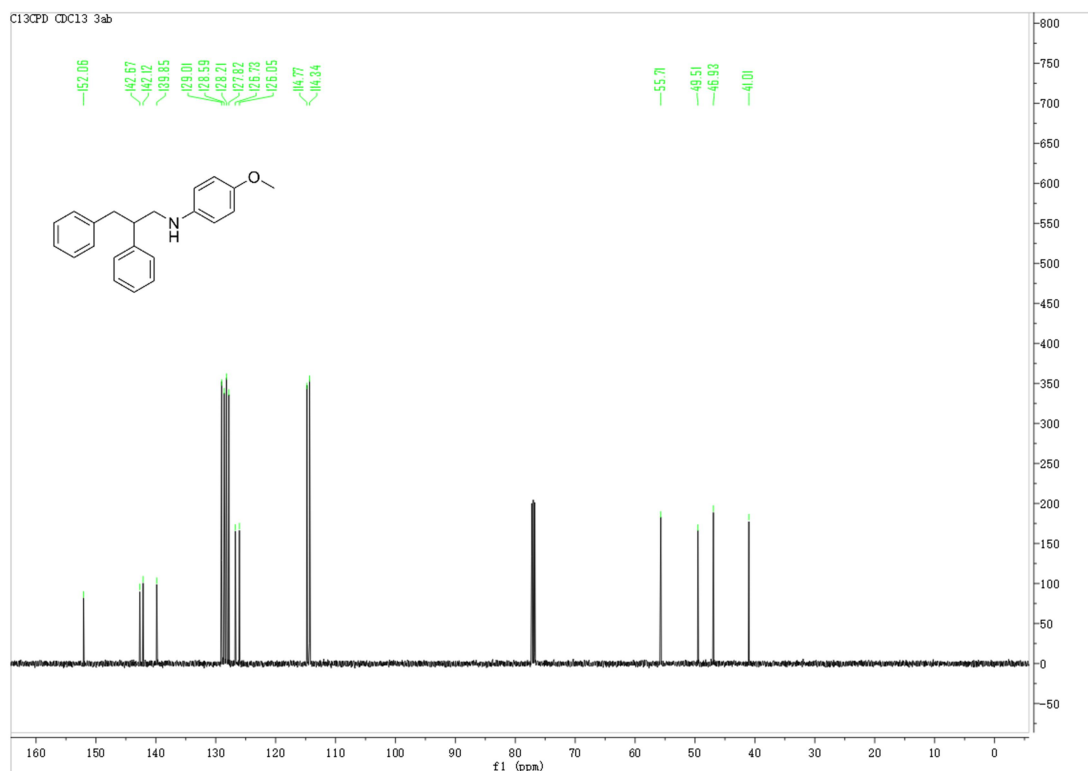

Supplementary Figure 182.  $^{13}\text{C}$  NMR spectrum of **3ab** in  $\text{CDCl}_3$ .

00134 #22 RT: 0.30 AV: 1 NL: 6.25E8  
T: FTMS + p ESI Full ms [100.00-1000.00]

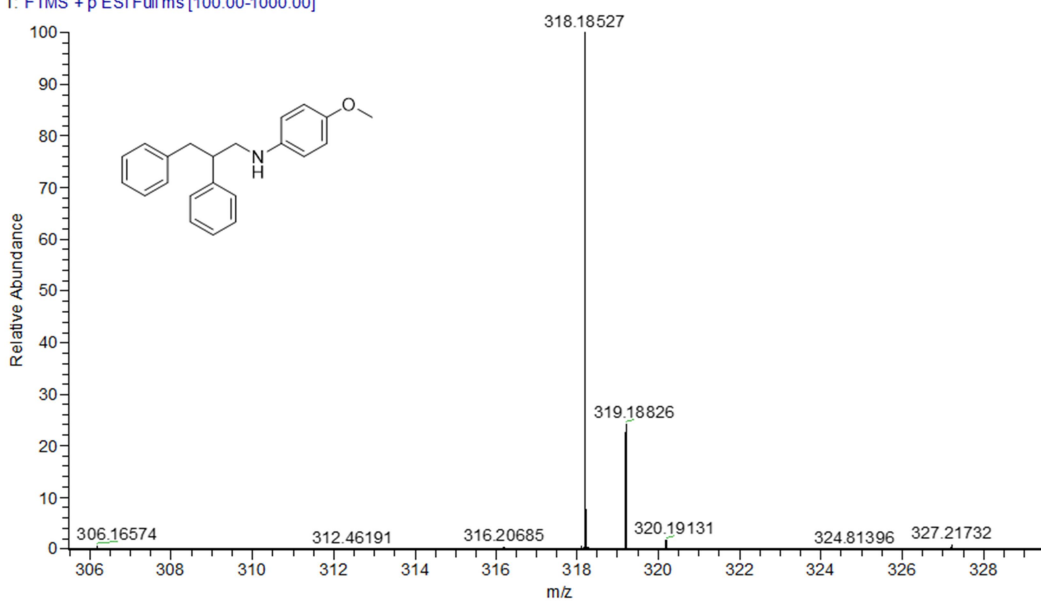

Supplementary Figure 183. HRMS of 3ab.

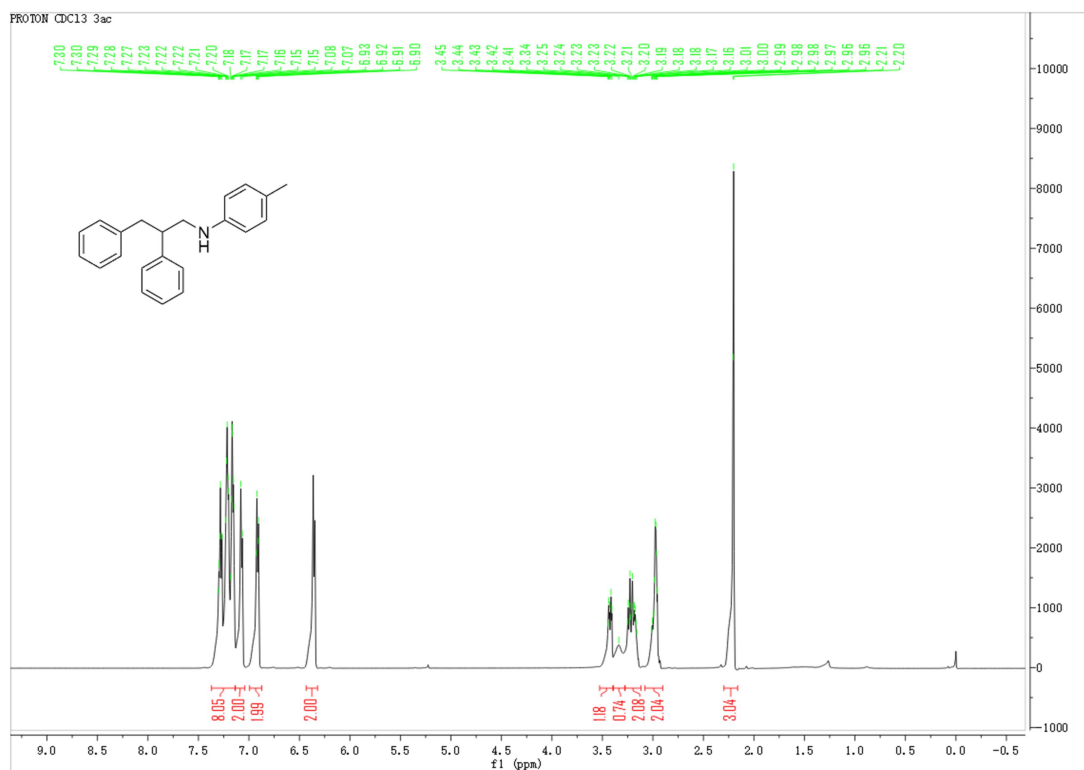

Supplementary Figure 184.  $^1\text{H}$  NMR spectrum of 3ac in  $\text{CDCl}_3$ .

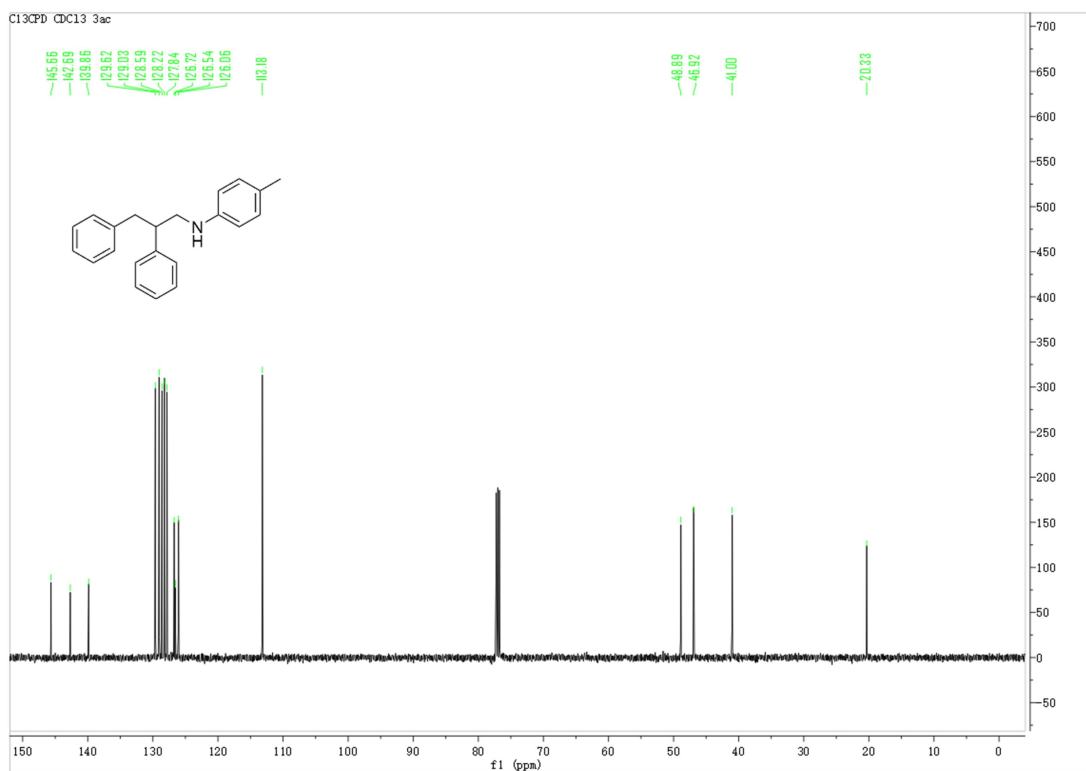

Supplementary Figure 185.  $^{13}\text{C}$  NMR spectrum of **3ac** in  $\text{CDCl}_3$ .

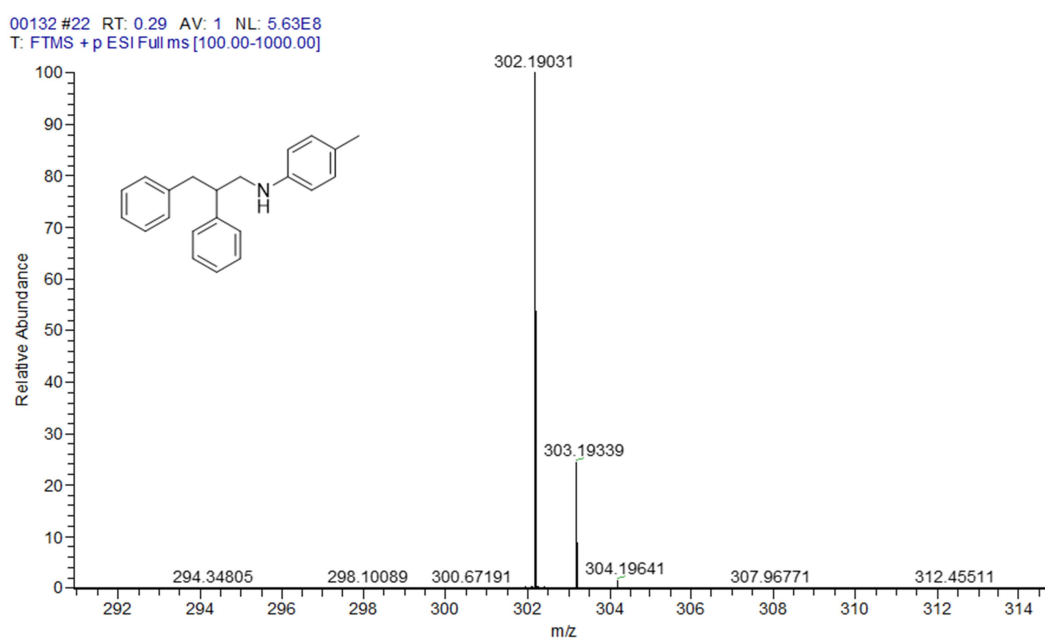

Supplementary Figure 186. HRMS of **3ac**.

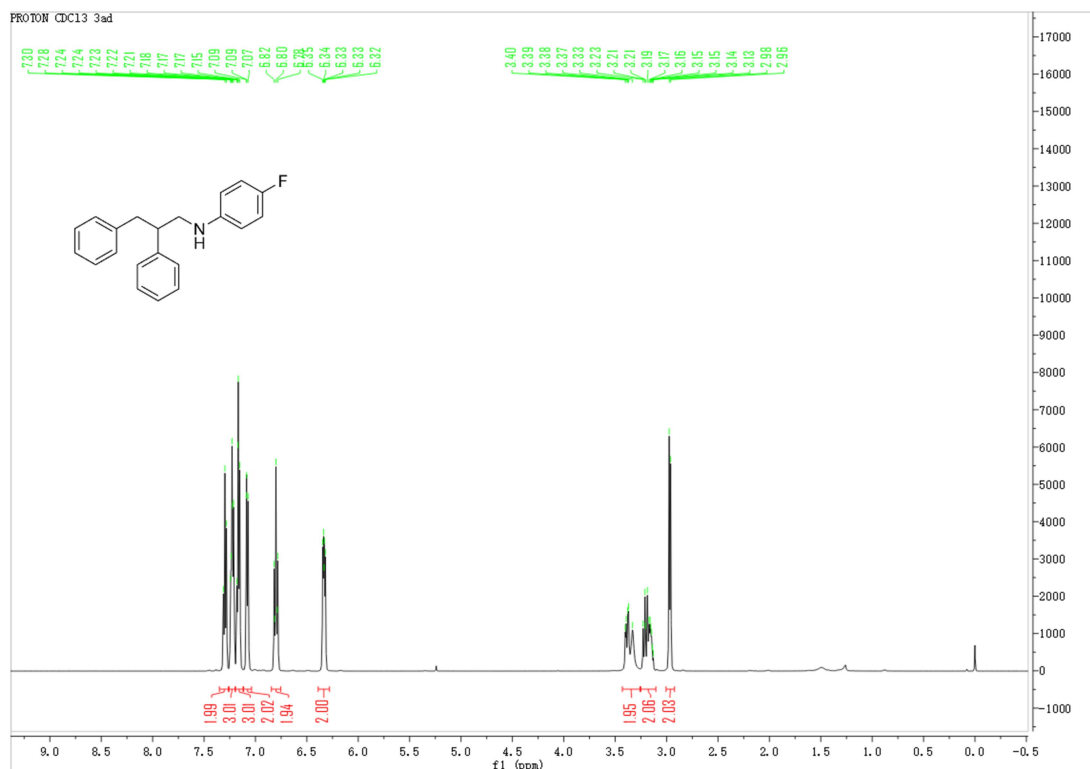

Supplementary Figure 187.  $^1\text{H}$  NMR spectrum of **3ad** in  $\text{CDCl}_3$ .

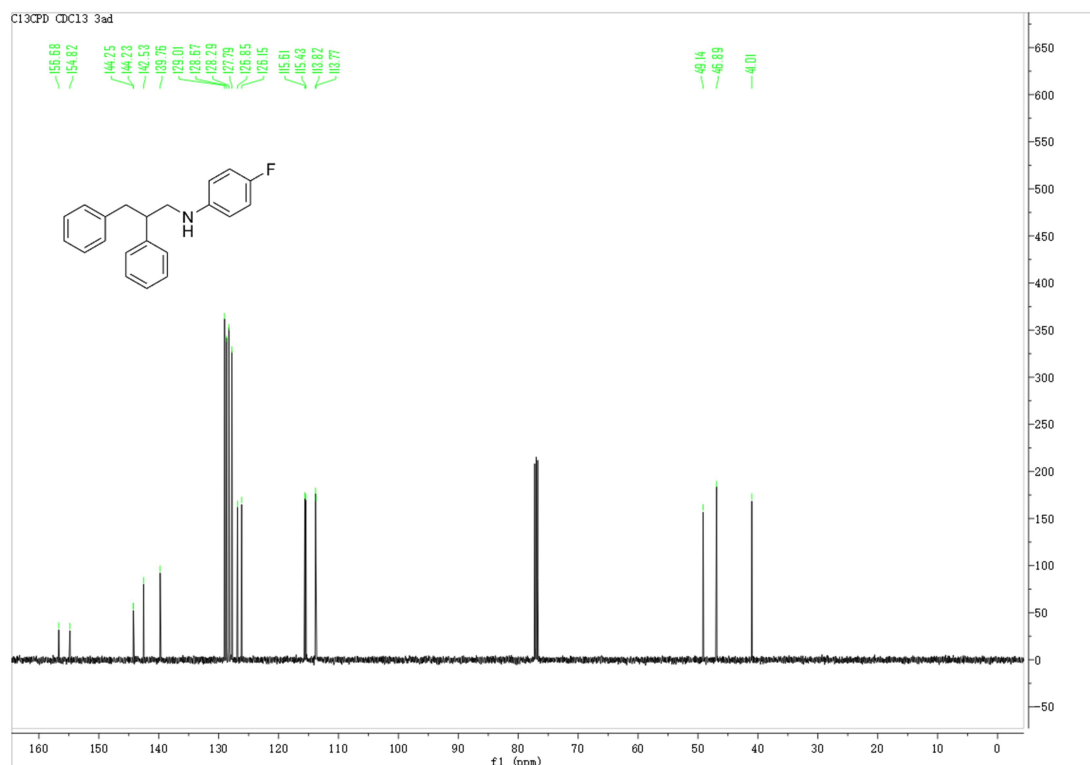

Supplementary Figure 188.  $^{13}\text{C}$  NMR spectrum of **3ad** in  $\text{CDCl}_3$ .

00133 #22 RT: 0.30 AV: 1 NL: 4.49E8  
T: FTMS + p ESI Full ms [100.00-1000.00]

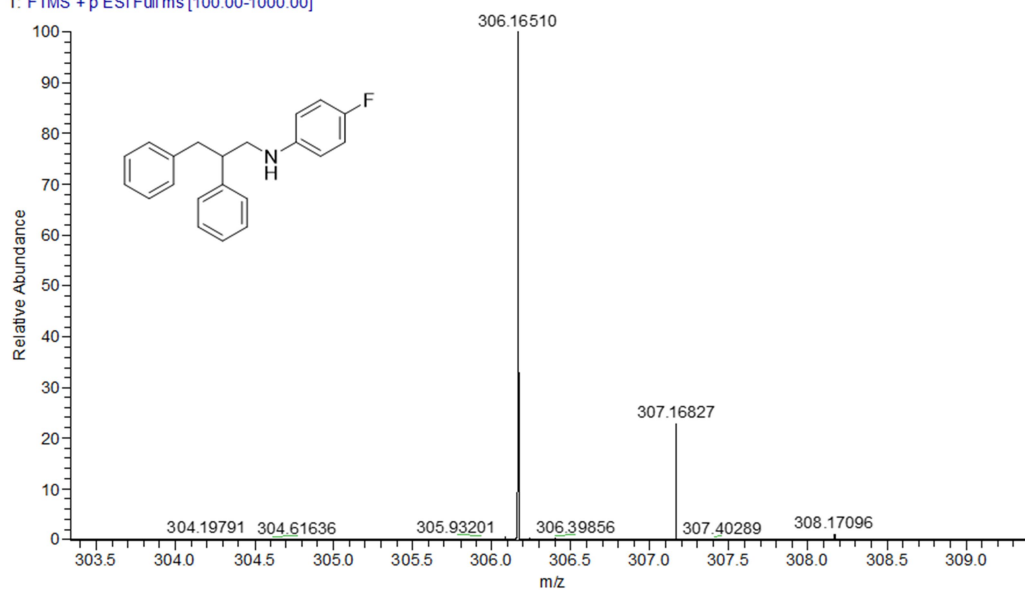

Supplementary Figure 189. HRMS of 3ad.

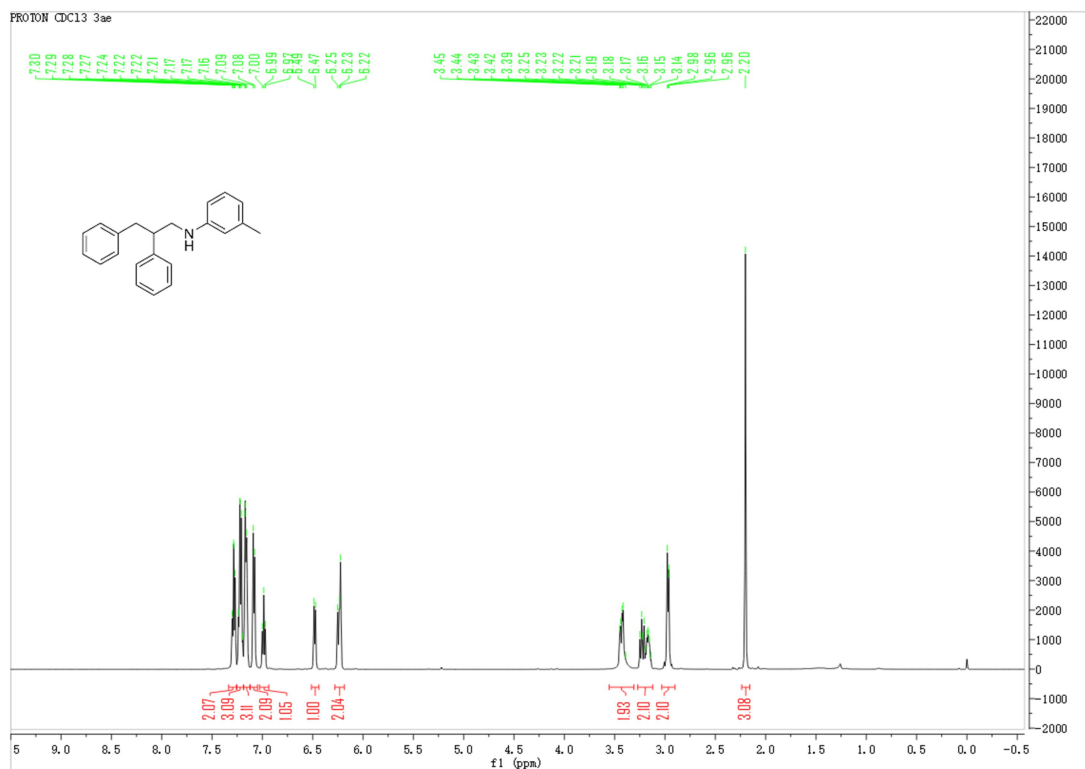

Supplementary Figure 190. <sup>1</sup>H NMR spectrum of 3ae in CDCl<sub>3</sub>.



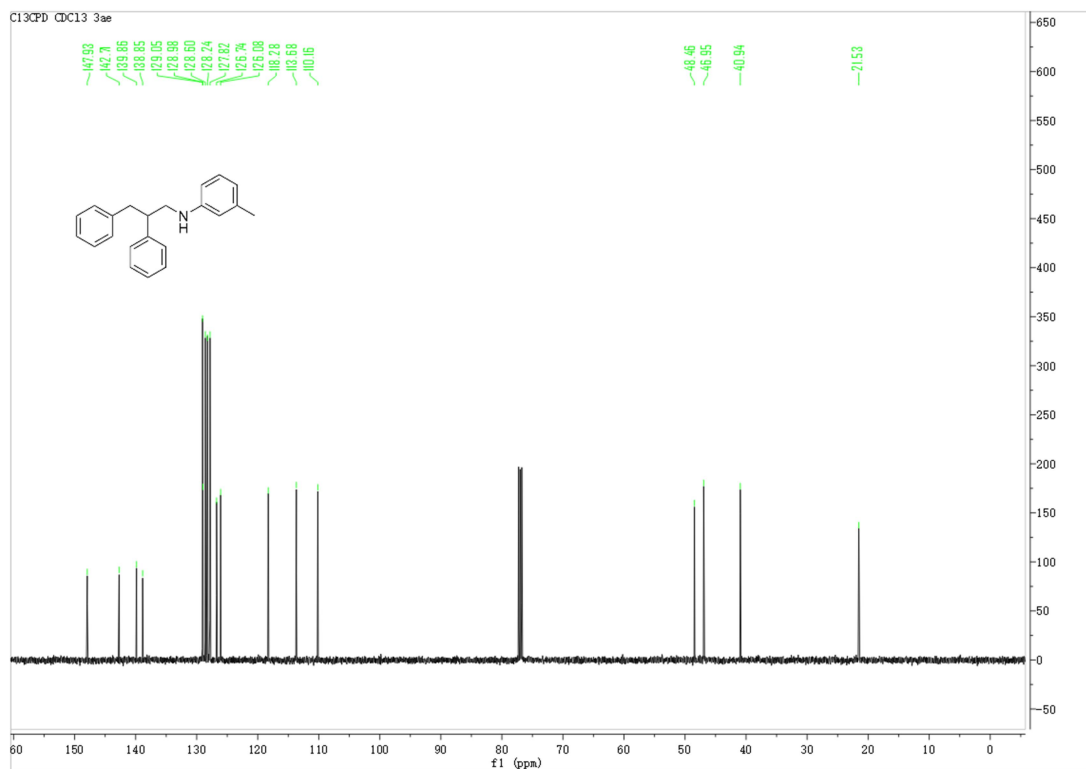

Supplementary Figure 191.  $^{13}\text{C}$  NMR spectrum of **3ae** in  $\text{CDCl}_3$ .

00129 #27 RT: 0.37 AV: 1 NL: 6.82E8  
T: FTMS + p ESI Full ms [100.00-1000.00]

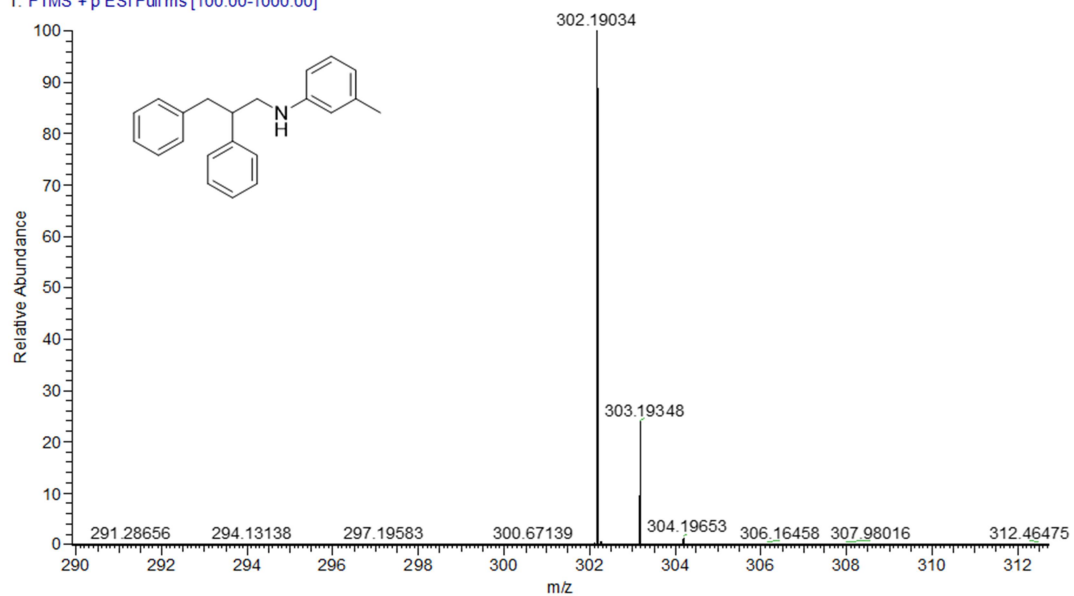

Supplementary Figure 192. HRMS of **3ae**.

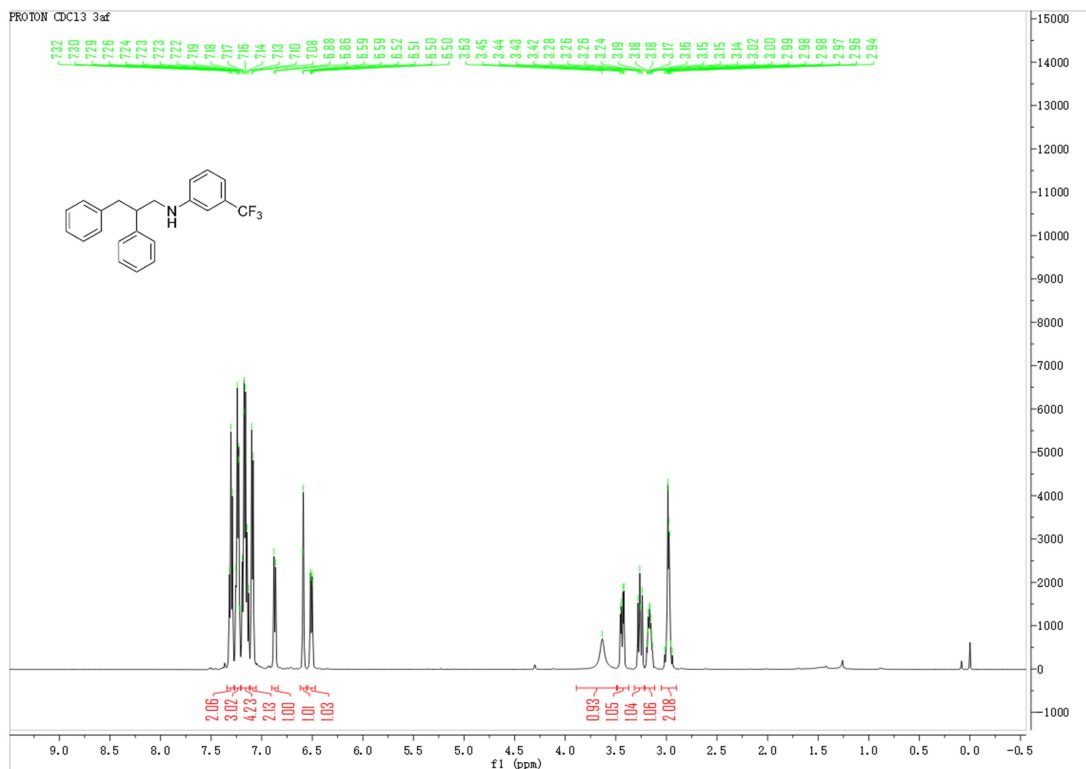

Supplementary Figure 193.  $^1\text{H}$  NMR spectrum of 3af in  $\text{CDCl}_3$ .

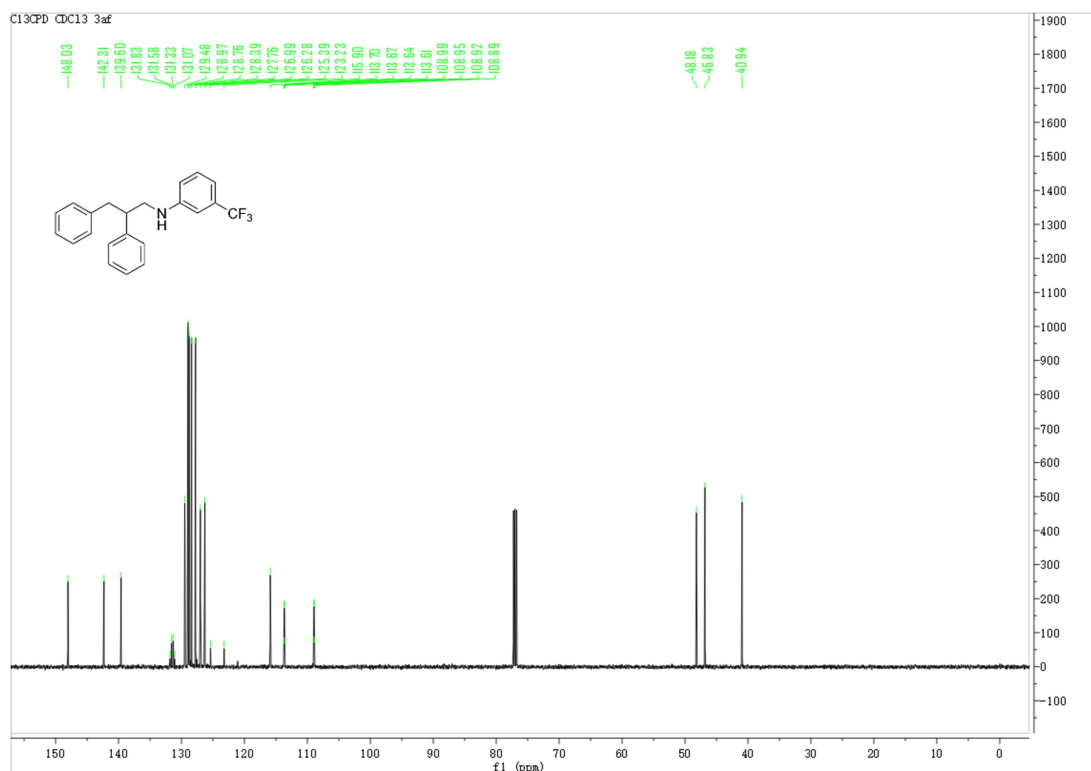

Supplementary Figure 194.  $^{13}\text{C}$  NMR spectrum of 3af in  $\text{CDCl}_3$ .

00130 #27 RT: 0.37 AV: 1 NL: 2.05E8  
T: FTMS + p ESI Full ms [100.00-1000.00]

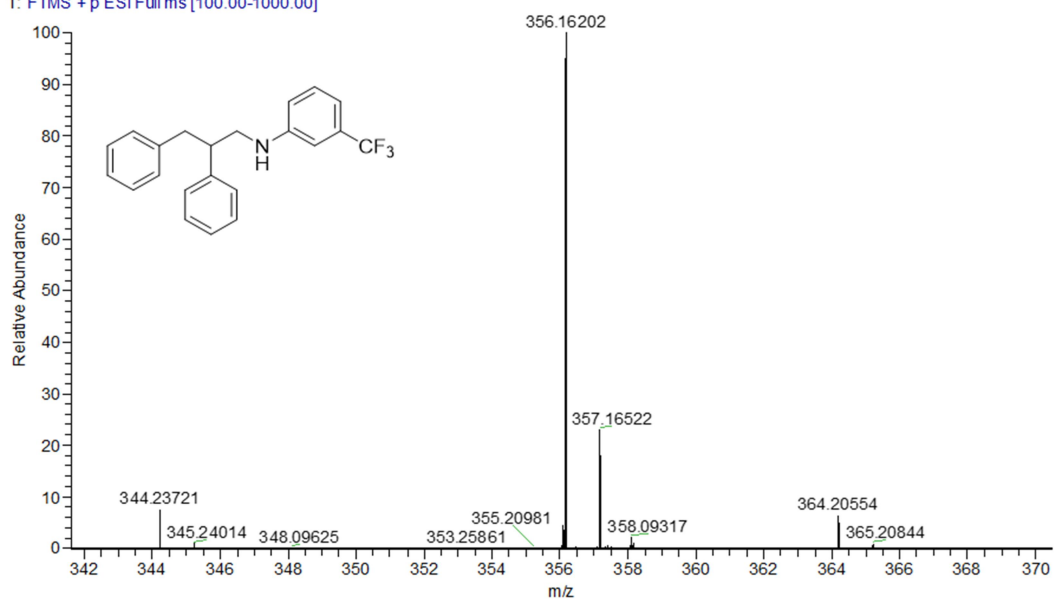

Supplementary Figure 195. HRMS of 3af.

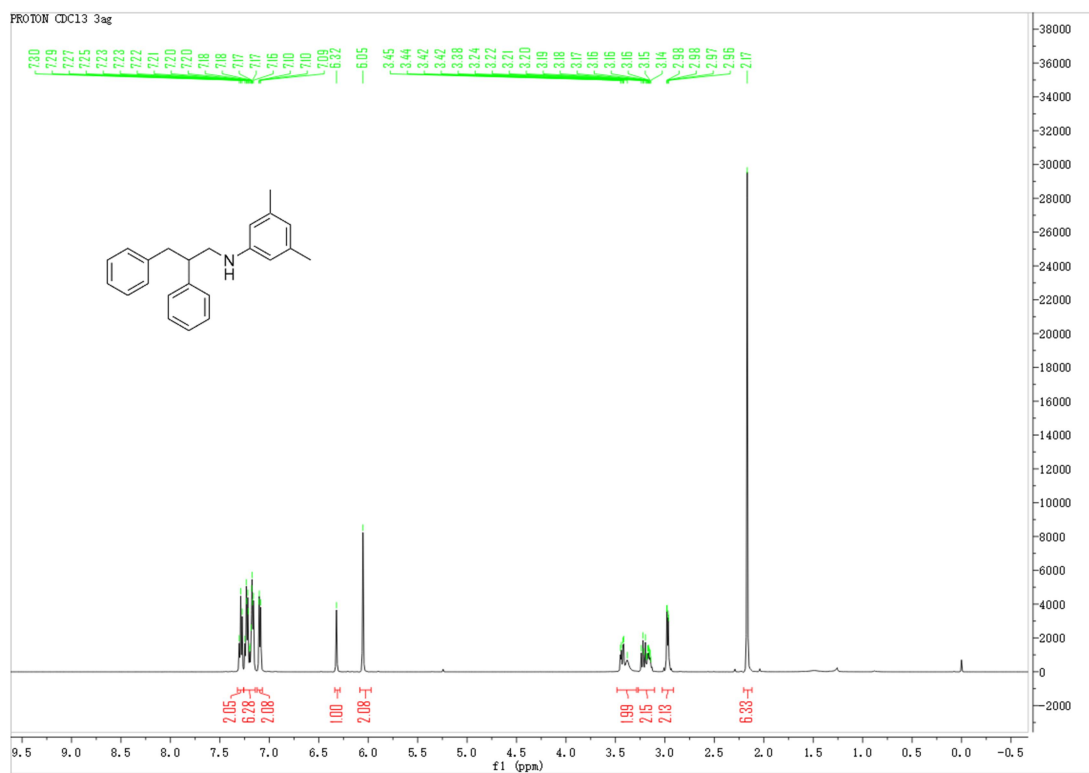

Supplementary Figure 196.  $^1\text{H}$  NMR spectrum of 3ag in  $\text{CDCl}_3$ .

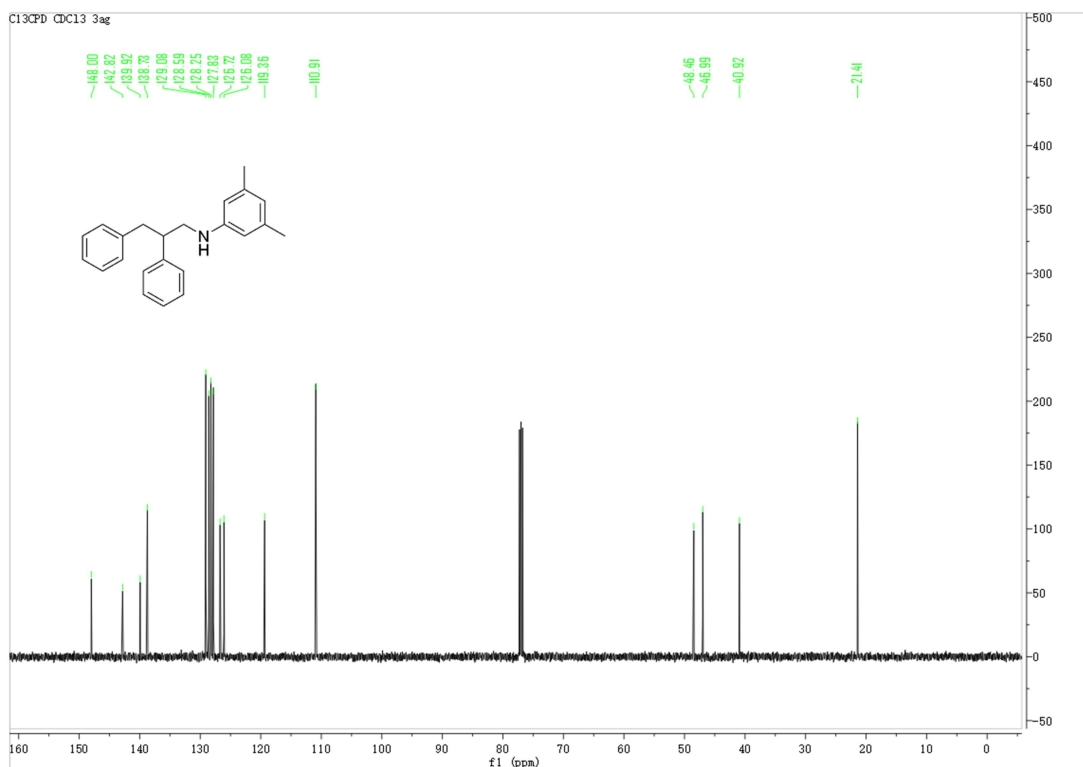

Supplementary Figure 197.  $^{13}\text{C}$  NMR spectrum of **3ag** in  $\text{CDCl}_3$ .

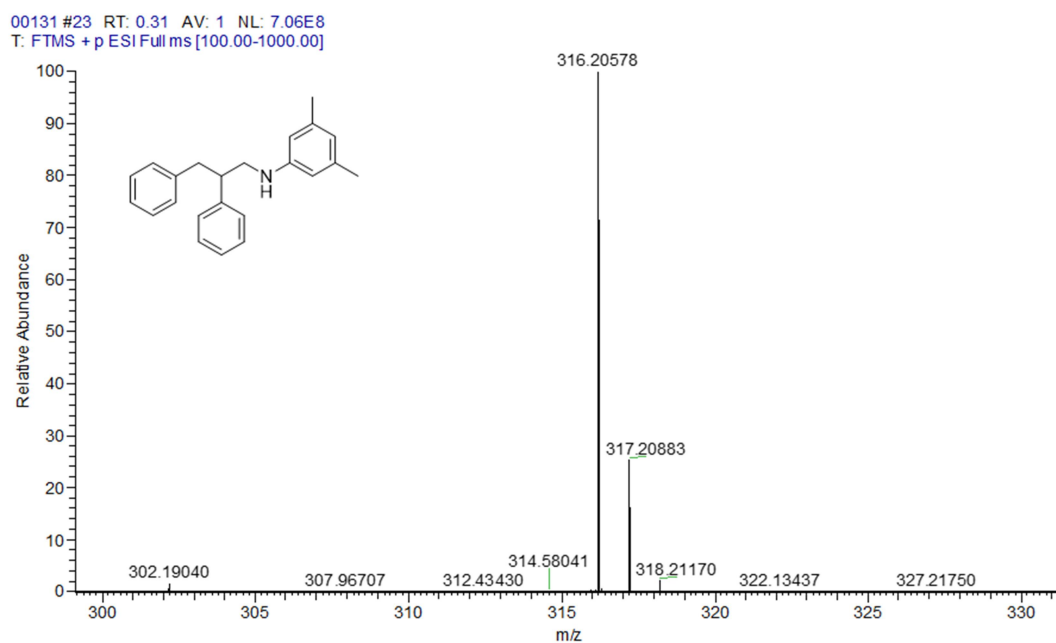

Supplementary Figure 198. HRMS of **3ag**.

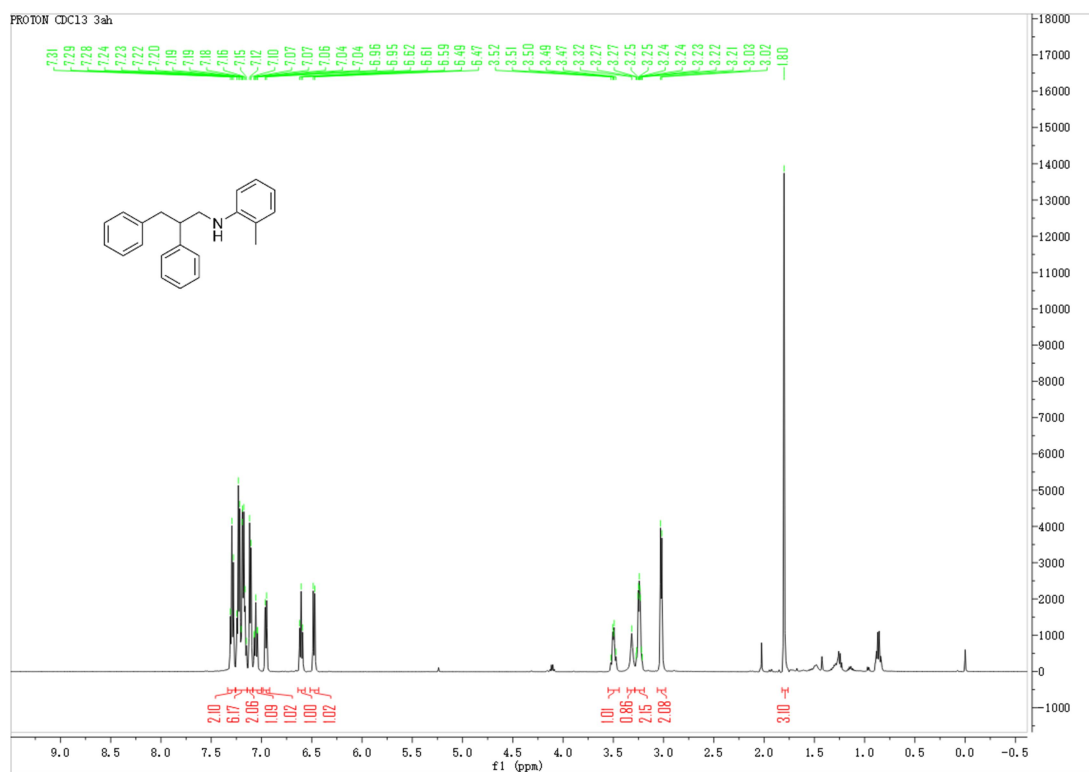

Supplementary Figure 199.  $^1\text{H}$  NMR spectrum of **3ah** in  $\text{CDCl}_3$ .

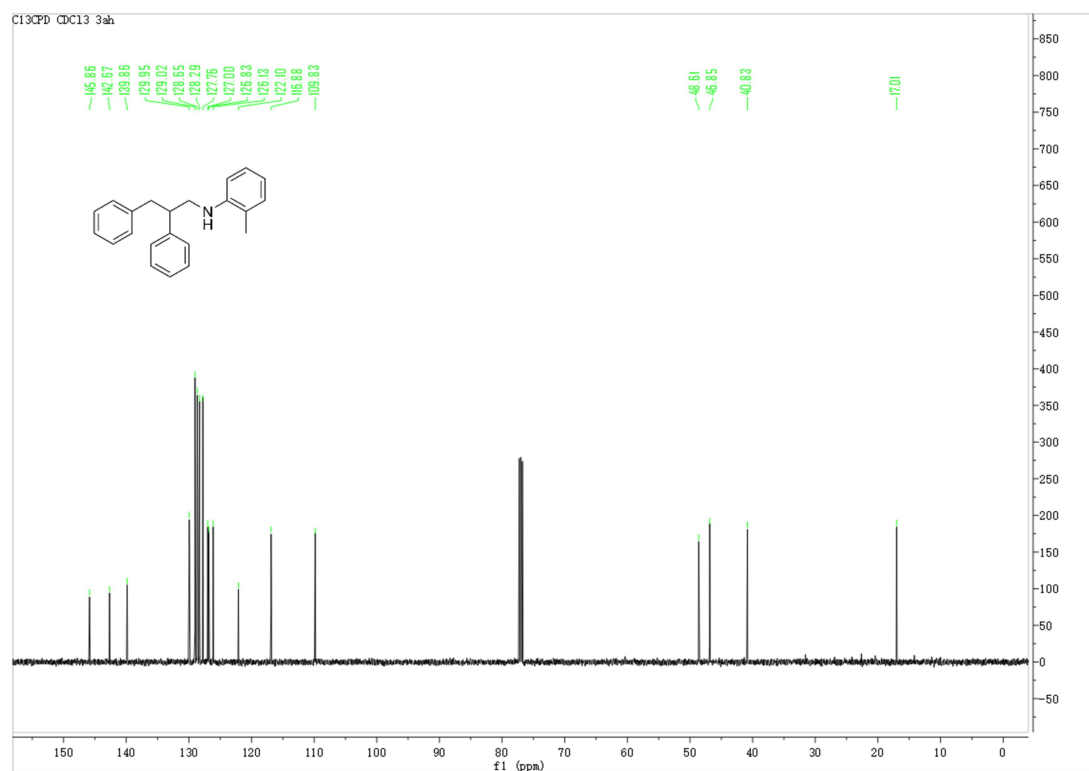

Supplementary Figure 200.  $^{13}\text{C}$  NMR spectrum of **3ah** in  $\text{CDCl}_3$ .

00127 #21 RT: 0.28 AV: 1 NL: 5.59E8  
T: FTMS + p ESI Full ms [100.00-1000.00]

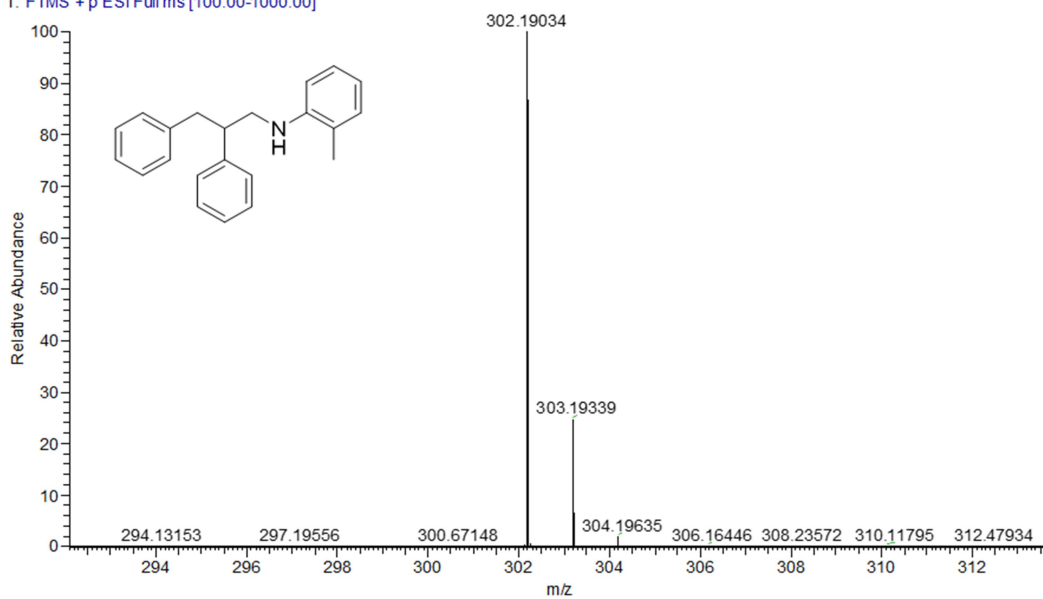

Supplementary Figure 201. HRMS of 3ah.

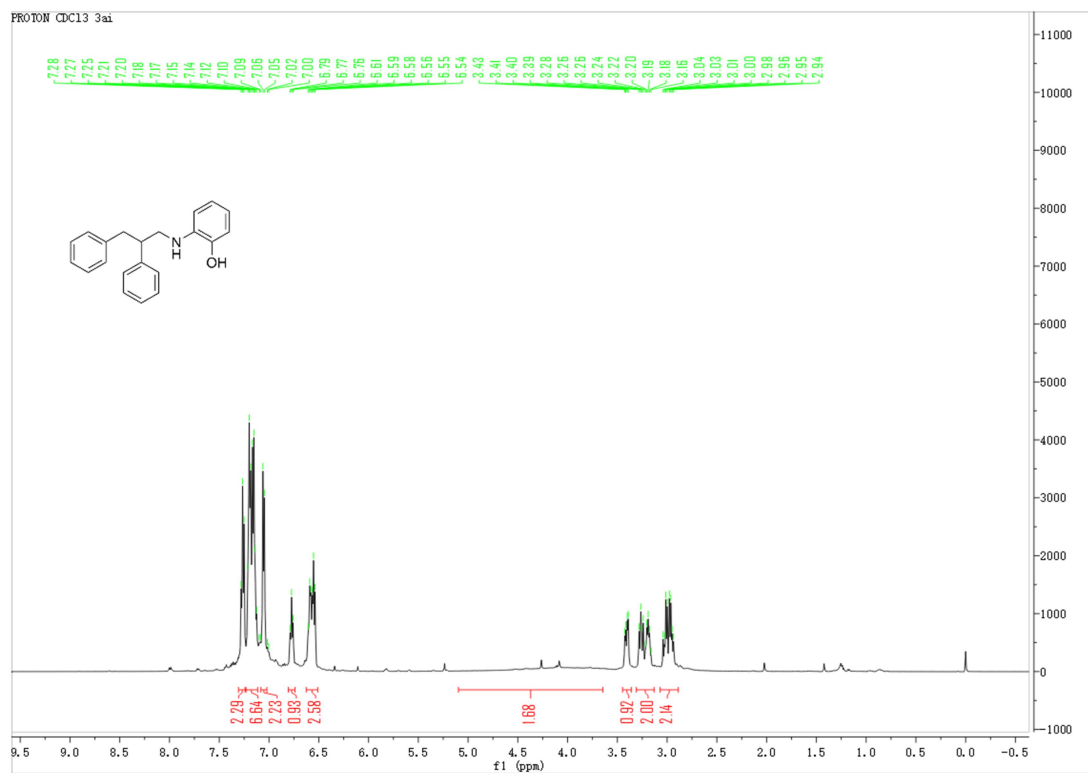

Supplementary Figure 202. <sup>1</sup>H NMR spectrum of 3ai in CDCl<sub>3</sub>.

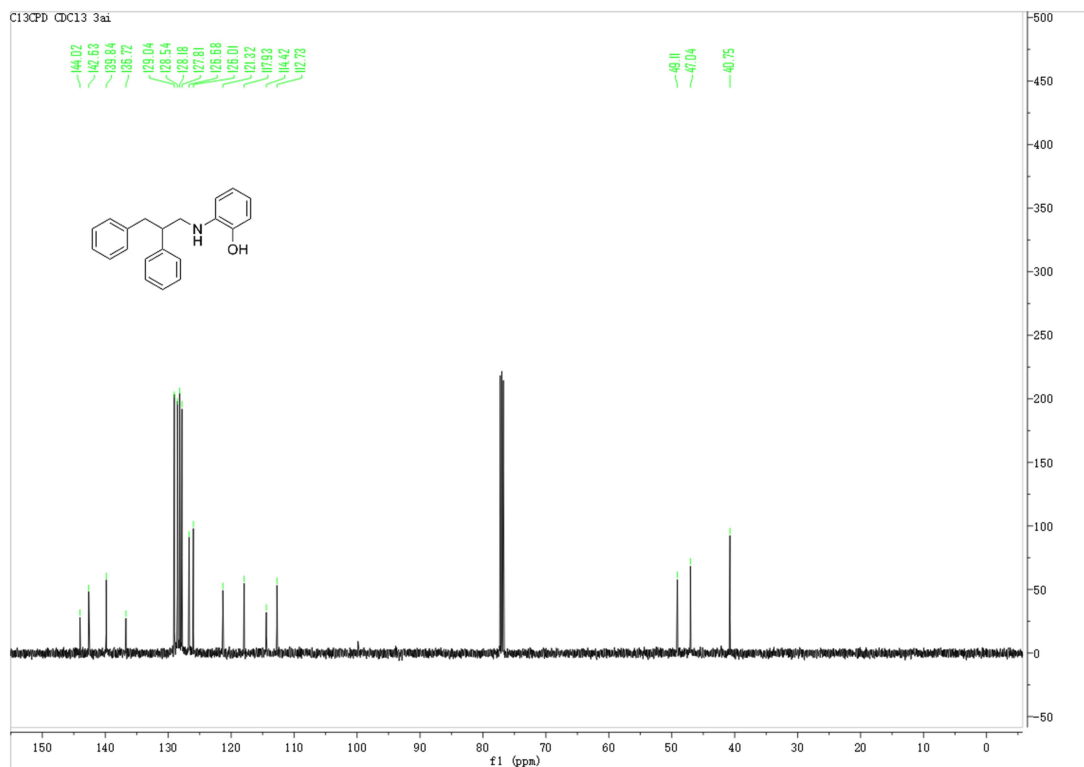

Supplementary Figure 203.  $^{13}\text{C}$  NMR spectrum of **3ai** in  $\text{CDCl}_3$ .

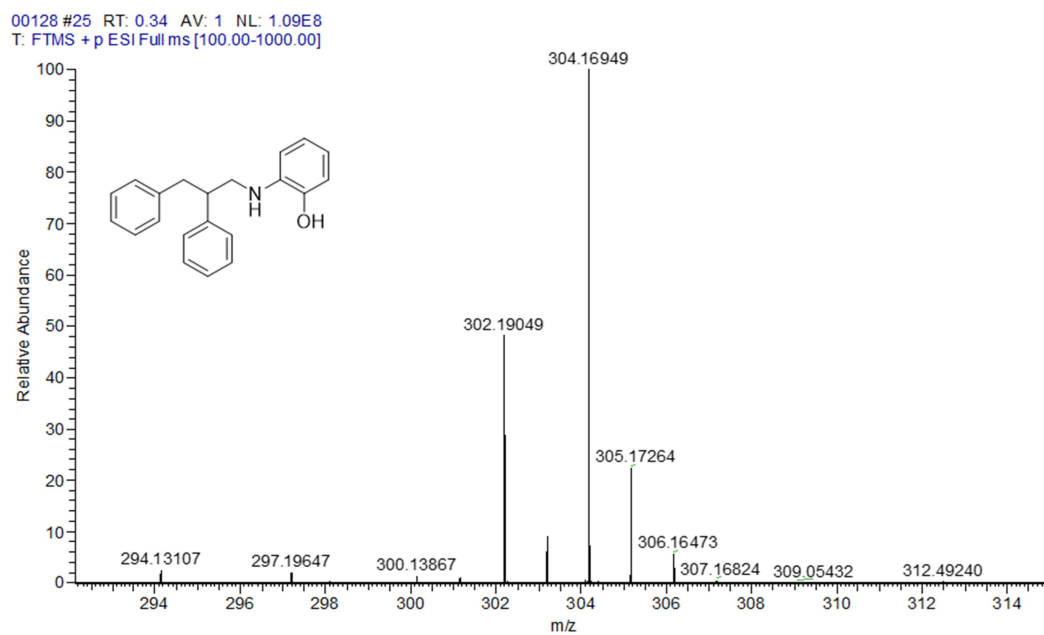

Supplementary Figure 204. HRMS of **3ai**.

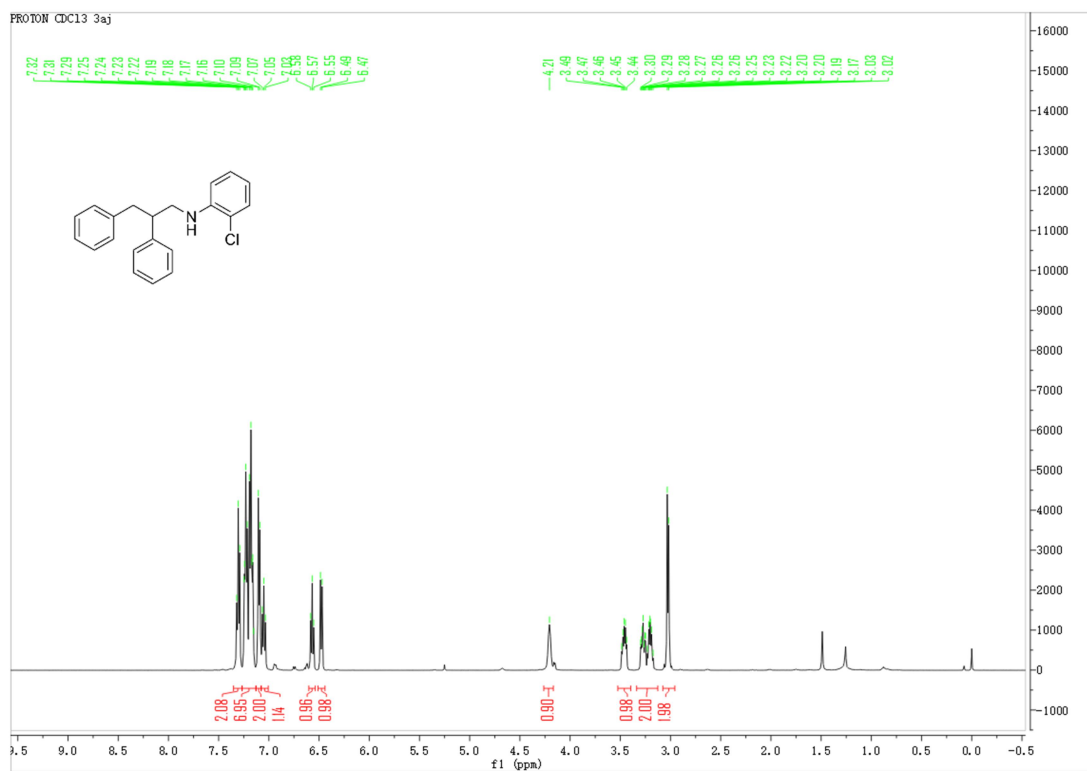

Supplementary Figure 205.  $^1\text{H}$  NMR spectrum of **3aj** in  $\text{CDCl}_3$ .

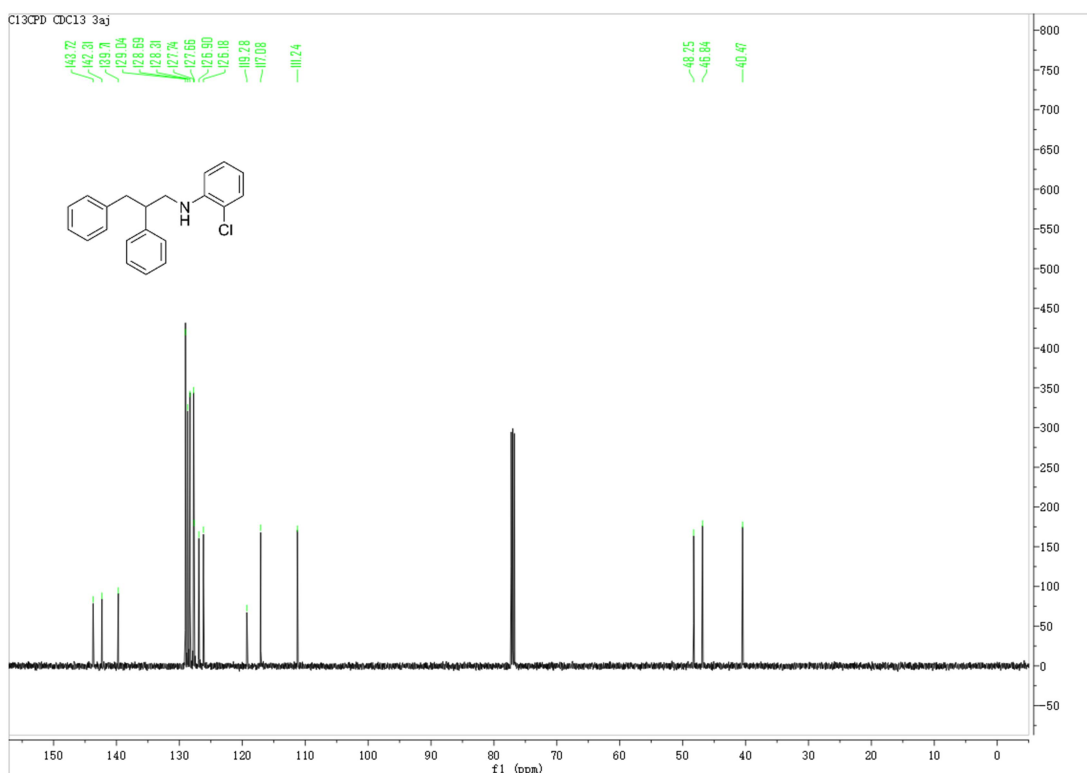

Supplementary Figure 206.  $^{13}\text{C}$  NMR spectrum of **3aj** in  $\text{CDCl}_3$ .



00126 #21 RT: 0.28 AV: 1 NL: 2.20E8  
T: FTMS + p ESI Full ms [100.00-1000.00]

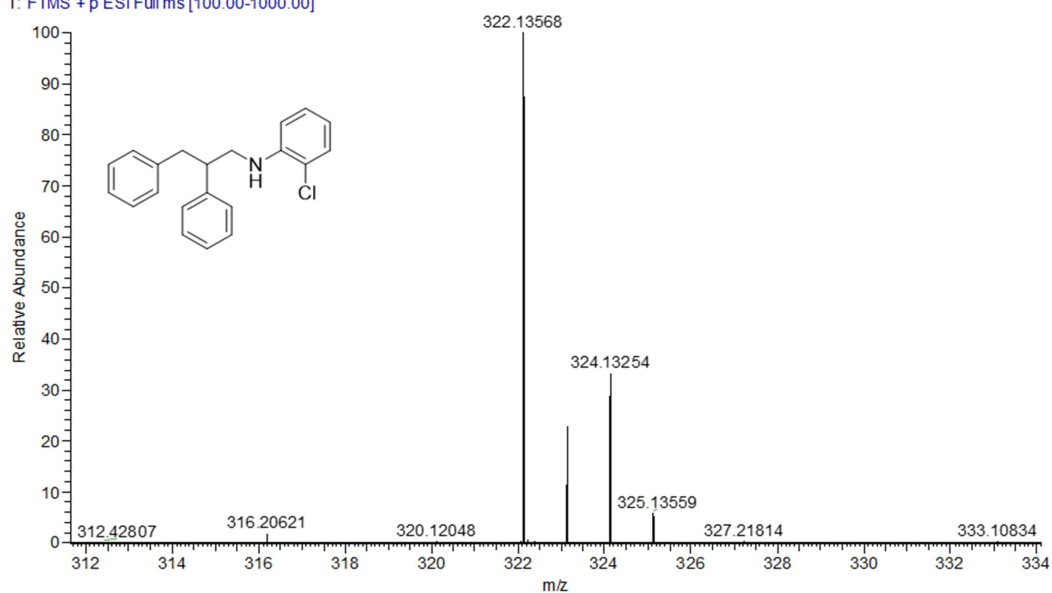

Supplementary Figure 207. HRMS of 3aj.

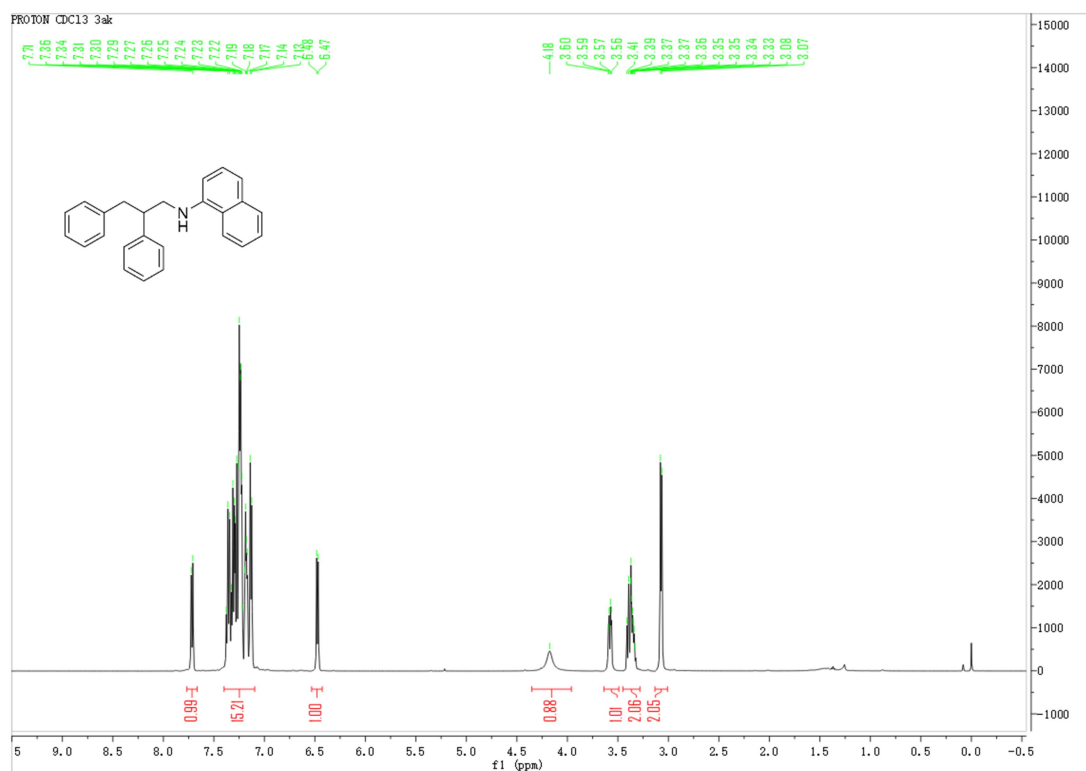

Supplementary Figure 208. <sup>1</sup>H NMR spectrum of 3ak in CDCl<sub>3</sub>.

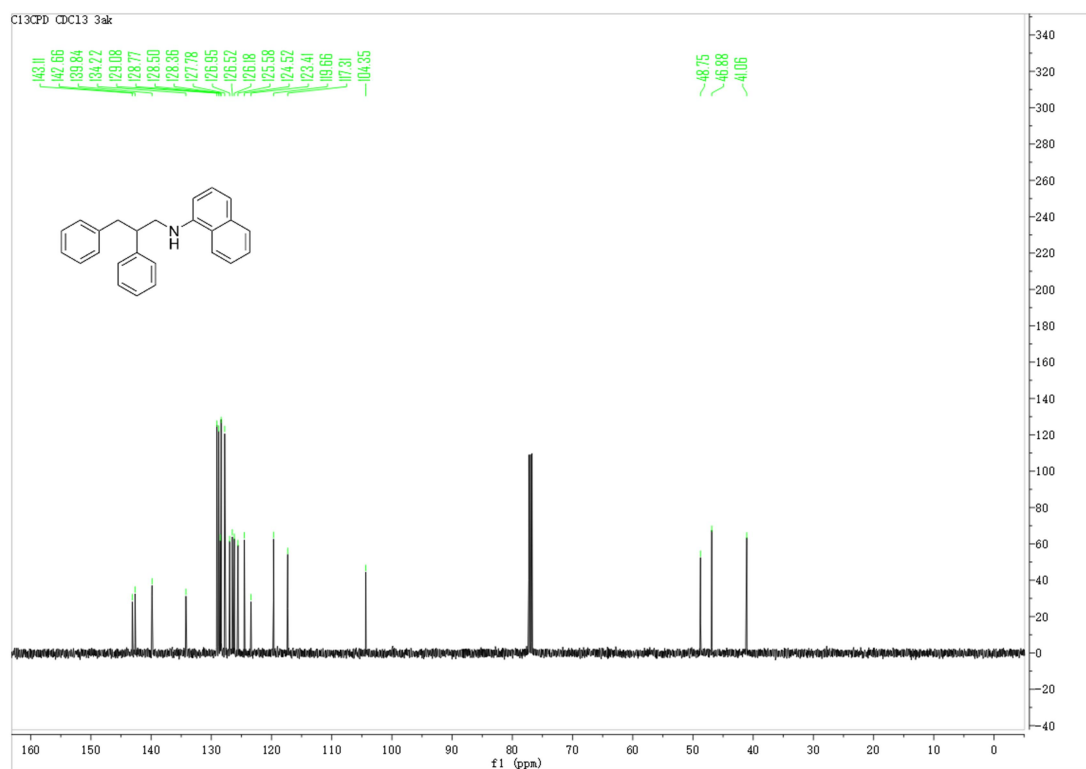

Supplementary Figure 209.  $^{13}\text{C}$  NMR spectrum of **3ak** in  $\text{CDCl}_3$ .

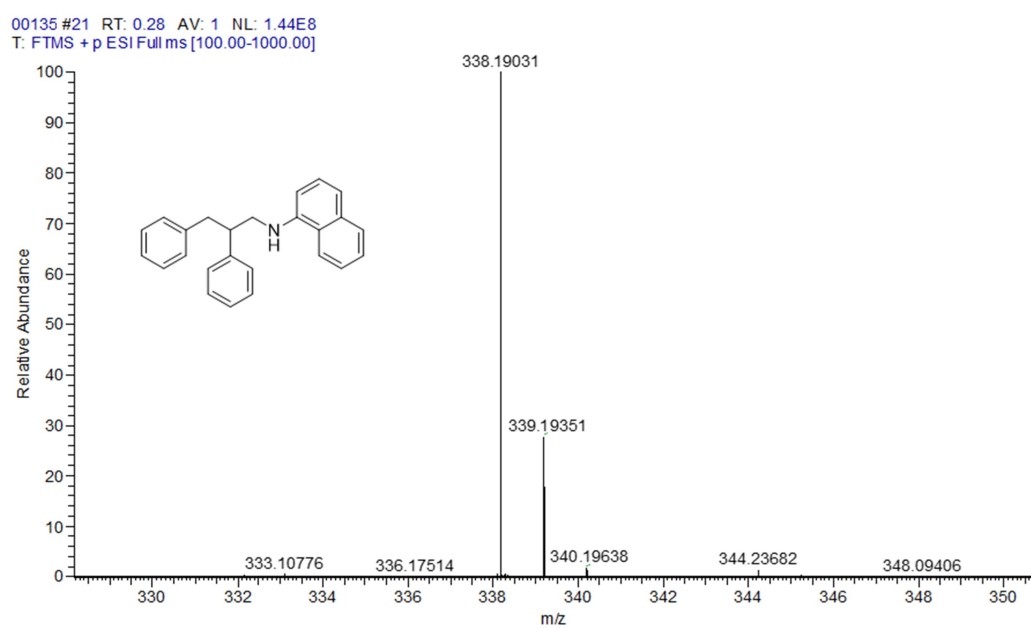

Supplementary Figure 210. HRMS of **3ak**.

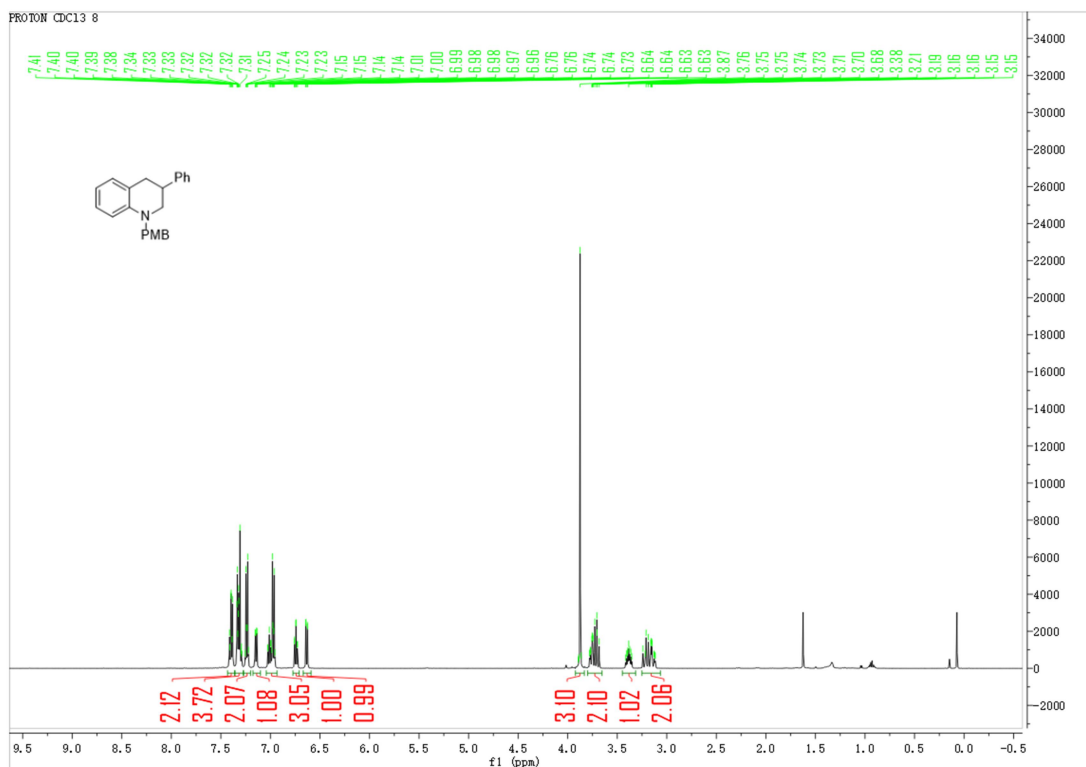

Supplementary Figure 211.  $^1\text{H}$  NMR spectrum of **6** in  $\text{CDCl}_3$ .

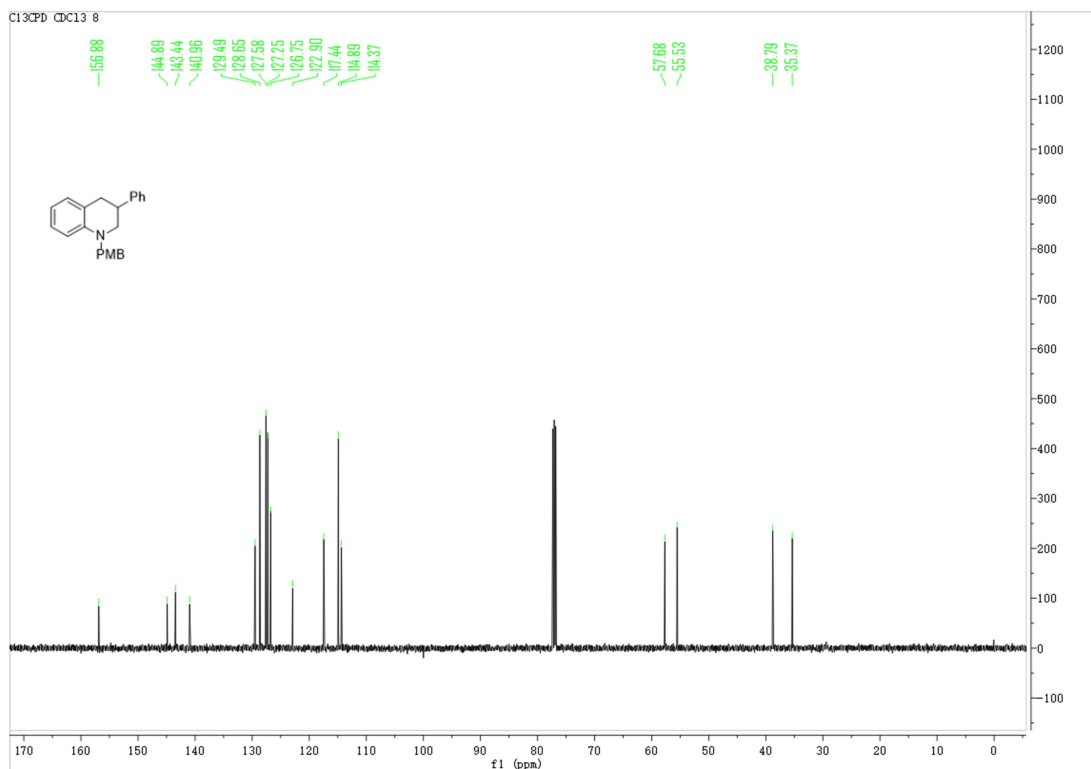

Supplementary Figure 212.  $^{13}\text{C}$  NMR spectrum of **6** in  $\text{CDCl}_3$ .

00206 #25 RT: 0.37 AV: 1 NL: 2.18E8  
T: FTMS +p ESI Full ms [100.00-1000.00]

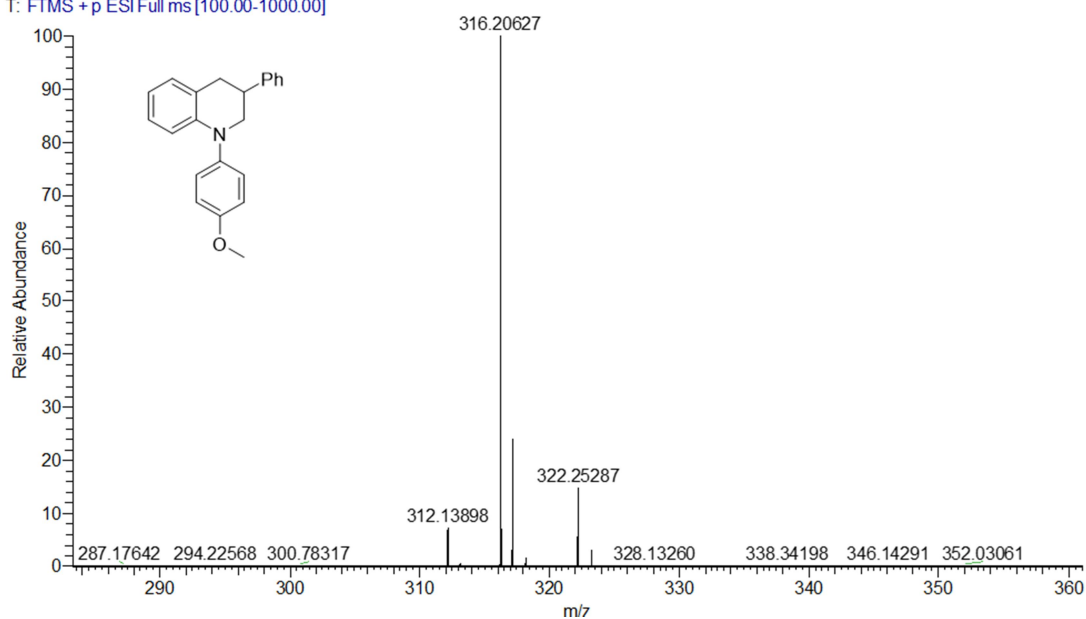

Supplementary Figure 213. HRMS of 6.

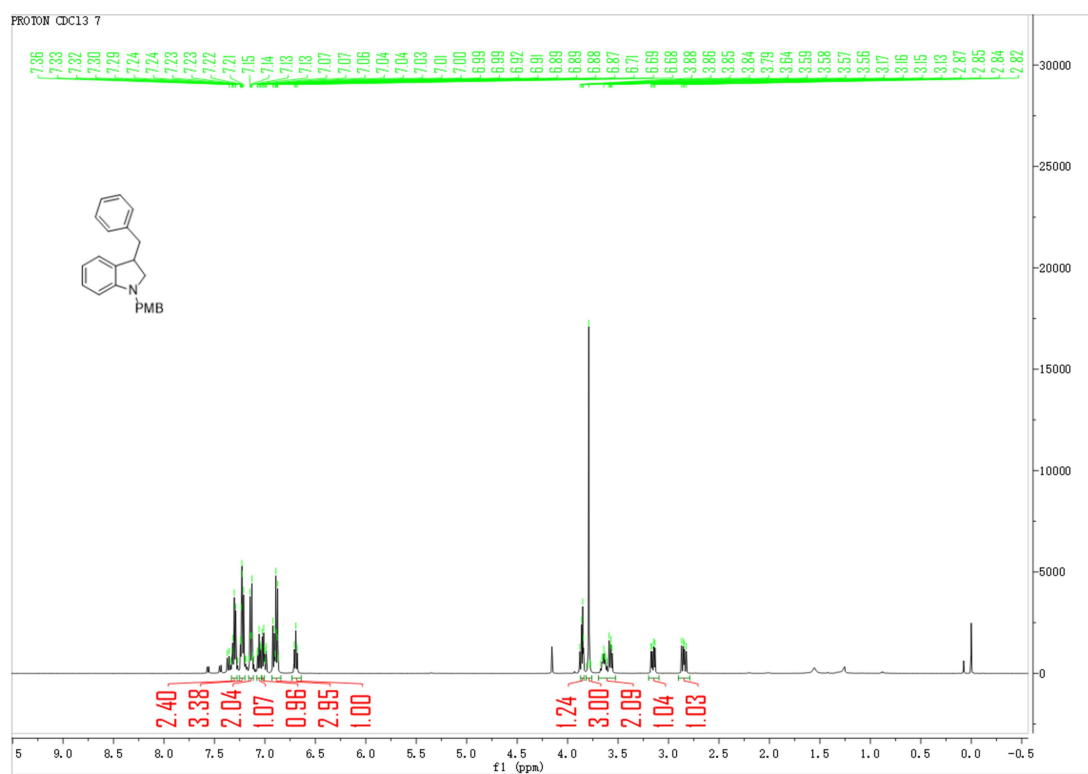

Supplementary Figure 214.  $^1\text{H}$  NMR spectrum of 7 in  $\text{CDCl}_3$ .

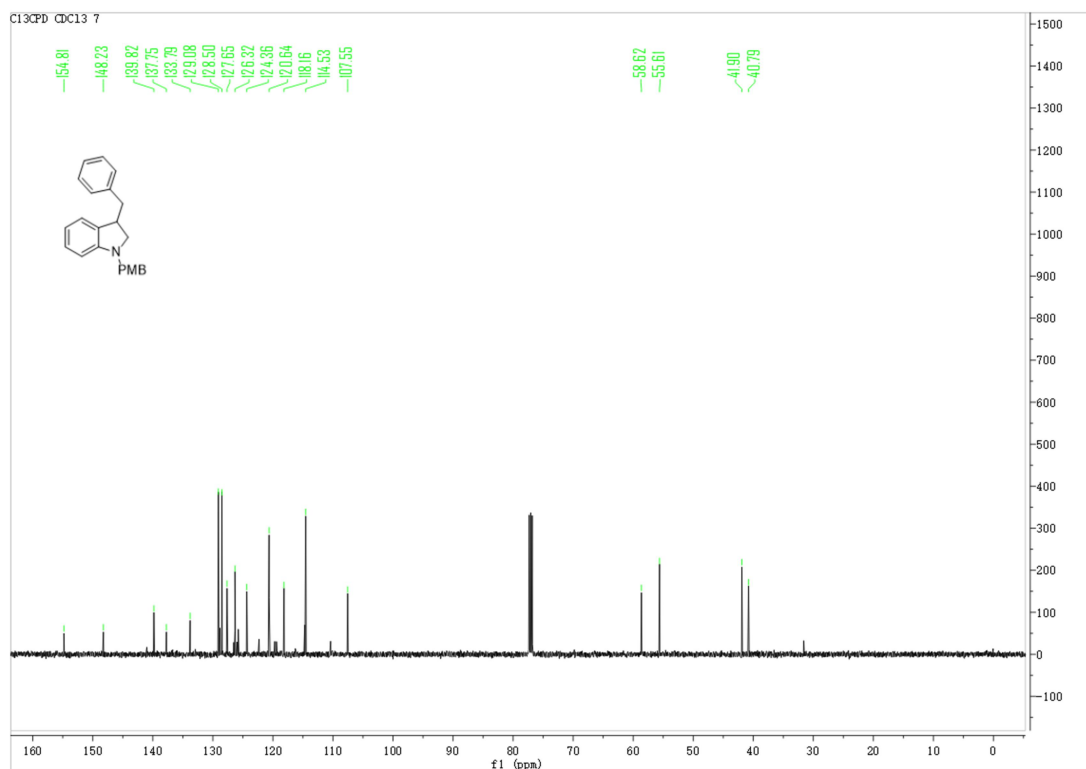

Supplementary Figure 215.  $^{13}\text{C}$  NMR spectrum of 7 in  $\text{CDCl}_3$ .

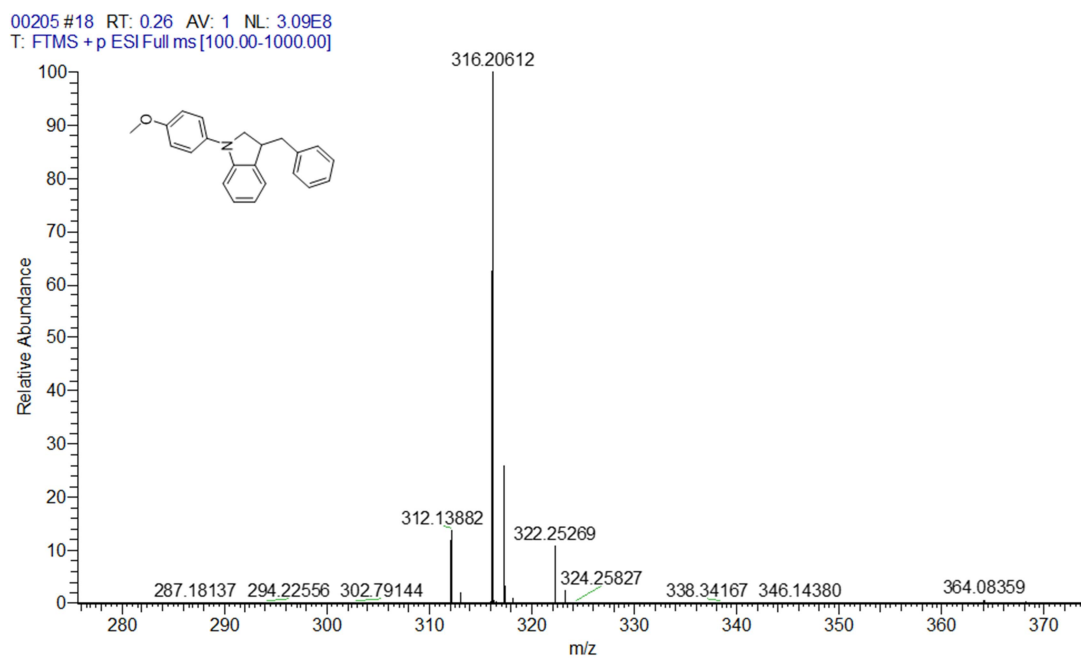

Supplementary Figure 216. HRMS of 7.

### Supplementary References:

1. C. B. Gilley, M. J. Buller and Y. Kobayashi. New entry to convertible isocyanides for the Ugi reaction and its application to the stereocontrolled formal total synthesis of the proteasome inhibitor omuralide. *Org. Lett.* **2007**, 9, 3631.
2. T. Matsuda, Y. Sakurai. Palladium-catalyzed ring-opening alkynylation of cyclopropenones. *Eur. J. Org. Chem.* **2013**, 20, 4219.
3. M. Larsson, H. E. Hogberg. Diastereoselective addition of methylmetal reagents to 2-methylaldehydes. *Tetrahedron* **2001**, 57, 7541.
4. Parthasarathy Gandeepan, P. Rajamalli, Chien-Hong Cheng. Palladium-catalyzed dehydrogenative  $\beta$ -Arylation of simple saturated carbonyls by aryl halides. *ACS Catalysis* **2014**, 4(12), 4485-4489.
5. B. O. A. Tasch, L. Bensch, T. J. J. Müller. Masuda borylation-Suzuki coupling (MBSC) sequence of vinylhalides and its application in a one-pot synthesis of 3,4-biarylpyrazoles. *Org. Biomol. Chem.* **2013**, 11,6113-6118.
6. X.-L. Zhang, Y.-Q. Wang. Dehydrogenative  $\beta$ -Arylation of saturated aldehydes using transient directing groups. *Org. Lett.* **2019**, 21, 2731-2735.
7. X. Song, A. Song, W. Wang. Direct stereoselective  $\alpha$ -arylation of unmodified enals using an organocatalytic cross-coupling-like reaction. *Nature commun.* **2011**, 2, 524.
8. J. Liu, X. Wen, C. Qin, N. Jiao. Oxygenation of simple olefins through selective allylic C-C bond cleavage: A direct approach to cinnamyl aldehydes. *Angew. Chem. Int. Ed.* **2017**, 56, 11940-11944.
9. N. Lahmar, J. Aatar, T. B. Ayed, M. Bellassoued. A general route to  $\alpha$ -alkyl (E)- $\alpha,\beta$ -unsaturated aldehydes. *J. Organomet. Chem.* **2006**, 691, 3018-3026.
10. J.-H. Kim, R. J. Kulawiec. A tandem epoxide isomerization-aldol condensation process catalyzed by palladium acetate-tributylphosphine. *J. Org. Chem.* **1996**, 61, 7656-7657.
11. I. Choi, S. Chun, Y. K. Chung. Bimetallic Cobalt-Rhodium nanoparticle-catalyzed reductive amination of aldehydes with nitroarenes under atmospheric hydrogen. *J. Org. Chem.* **2017**, 82, 12771-12777.
12. H. Doušová, R. Horák, Z. Růžičková. An intramolecular C-N cross-coupling of  $\beta$ -enaminones: a simple and efficient way to precursors of some alkaloids of *Galipea officinalis*. *Beilstein J. Org. Chem.* **2015**, 11, 884-892.
